# Supplementary material for: RNA-Seq Analysis Reveals Hub Genes Involved in Chicken Intramuscular Fat and Abdominal Fat Deposition During Development
Source: Front Genet. 2020 Aug 28;11:1009. doi: 10.3389/fgene.2020.01009 (PMC7493673; doi:10.3389/fgene.2020.01009)
Supplement: TABLE S1 — Phenotypes of RNA-sequenced chickens. [file Data_Sheet_1.xlsx]

## Sheet: Table S1
Table S1. Phenotypes of the RNA sequenced chickens
Number	Individual_ID	Familiy_ID	Developmental stages	Gender	Body_Weight (g)	Abdominal fat weight (g)	Breast muscle weight (g)	IMF of breast muscle(%)	breast muscle ratio (%)	BM_RNA-seq library	AF_RNA-seq library
1	E12_07	07	Embryonic day 12	Female	4.8124	0	0.0948	0.0134023	0.0196991	1	0
2	E12_14	14	Embryonic day 12	Female	5.1776	0	0.1018	0.0134023	0.0196616	1	0
3	E12_19	19	Embryonic day 12	Female	4.6344	0	0.0729	0.0134023	0.0157302	1	0
4	E17_07	07	Embryonic day 17	Female	19.5626	0	0.3218	0.0133064	0.0164498	1	0
5	E17_14	14	Embryonic day 17	Female	19.0707	0	0.3093	0.0133064	0.0162186	1	0
6	E17_19	19	Embryonic day 17	Female	20.288	0	0.4202	0.0133064	0.0207118	1	0
7	D01_07	07	Day 01	Female	33.53	0	0.4	0.136667	0.0119296	1	0
8	D01_14	14	Day 01	Female	33.81	0	0.53	0.136667	0.0156758	1	0
9	D01_19	19	Day 01	Female	38.96	0	0.77	0.136667	0.0197639	1	0
10	D07_07	07	Day 07	Female	74.01	0.32	1.75	0.0148306	0.0236455	1	1
11	D07_14	14	Day 07	Female	63.6	0.27	2.4	0.0148306	0.0377358	1	1
12	D07_19	19	Day 07	Female	62.7	0.23	1.85	0.0148306	0.0295056	1	1
13	D21_07	07	Day 21	Female	184	3.35	13.18	0.0133199	0.0716304	1	1
14	D21_14	14	Day 21	Female	200.5	4.33	14.73	0.0133735	0.0734663	1	1
15	D21_19	19	Day 21	Female	221.4	5.63	20.28	0.0194968	0.0915989	1	1
16	D56_07	07	Day 56	Female	569	11.5813	58.7813	0.022312	0.103306	1	1
17	D56_14	14	Day 56	Female	657	19.3813	63.3813	0.0146755	0.0964708	1	1
18	D56_19	19	Day 56	Female	552	12.6813	54.3813	0.0185387	0.0985168	1	1
19	D98_07	07	Day 98	Female	1217	57.49	118.05	0.0177175	0.0970008	1	1
20	D98_14	14	Day 98	Female	1367	73.24	139.86	0.0141047	0.102312	1	1
21	D98_19	19	Day 98	Female	1286	65.89	122.83	0.00970865	0.0955132	1	1
22	D140_07	07	Day 140	Female	1904	103.59	228.64	0.0385148	0.120084	1	1
23	D140_14	14	Day 140	Female	1632	139.43	168.29	0.03514	0.103119	1	1
24	D140_19	19	Day 140	Female	1769	107.22	185.22	0.0368	0.104703	1	1
25	D180_07	07	Day 180	Female	2196	104.64	286.08	0.0738614	0.130273	1	1
26	D180_14	14	Day 180	Female	1593	83.93	185.54	0.066904	0.116472	1	1
27	D180_19	19	Day 180	Female	2146	98.01	228.29	0.0703	0.106379	1	1

## Sheet: Table S2
Table S2. Alignment summary
Sample_ID:	E12B07	E12B14	E12B19	E17B07	E17B14	E17B19	D01B07	D01B14	D01B19	D07A07	D07A14	D07A19	D07B07	D07B14	D07B19	D21A07	D21A14	D21A19	D21B07	D21B14	D21B19	D56A07	D56A14	D56A19	D56B07	D56B14	D56B19	D98A07	D98A14	D98A19	D98B07	D98B14	D98B19	D140A07	D140A14	D140A19	D140B07	D140B14	D140B19	D180A07	D180A14	D180A19	D180B07	D180B14	D180B19
Number of input reads |	28397464	31154635	34355781	30788281	31638144	34958202	32003310	33170722	30155565	29983963	24064869	31480005	34172988	34636642	25011996	30772292	23143902	26447659	23611803	33617142	27574031	30902773	25208184	31307329	30752987	28909127	32288236	25809539	25138983	26571550	25349153	27608919	29779835	22336609	24760264	26436391	24810966	25585671	26870413	29638998	28102068	24755415	28119326	26303985	27814030
Average input read length |	2×125	2×125	2×125	2×125	2×125	2×125	2×125	2×125	2×125	2×125	2×125	2×125	2×125	2×125	2×125	2×125	2×125	2×125	2×125	2×125	2×125	2×125	2×125	2×125	2×125	2×125	2×125	2×125	2×125	2×125	2×125	2×125	2×125	2×125	2×125	2×125	2×125	2×125	2×125	2×125	2×125	2×125	2×125	2×125	2×125
UNIQUE READS:
Uniquely mapped reads number |	26767839	29514176	32037351	28396066	29400101	32549431	27440209	29446306	26367627	28486156	22085091	29711314	29298832	30468384	22037082	29263948	21694089	24850729	21144244	30593173	24843007	28953934	23305162	28901793	27515867	25432840	29641181	23988017	23755866	24577622	22348731	25129197	24885936	20127791	22152708	24402944	21140032	21963708	23266985	26795868	25585028	22503693	24769044	22841871	23111626
Uniquely mapped reads % |	0.9426	0.9473	0.9325	0.9223	0.9293	0.9311	0.8574	0.8877	0.8744	0.95	0.9177	0.9438	0.8574	0.8797	0.8811	0.951	0.9374	0.9396	0.8955	0.91	0.901	0.9369	0.9245	0.9232	0.8947	0.8798	0.918	0.9294	0.945	0.925	0.8816	0.9102	0.8357	0.9011	0.8947	0.9231	0.852	0.8584	0.8659	0.9041	0.9104	0.909	0.8809	0.8684	0.8309
Average mapped length |	248.54	248.62	248.45	248.57	248.57	248.56	248.41	248.47	248.45	248.64	248.47	248.43	248.5	248.56	248.49	248.53	248.48	248.53	248.63	248.51	248.62	248.57	248.67	248.57	248.6	248.58	248.74	248.64	248.52	248.57	248.41	248.6	248.41	248.29	248.37	248.44	248.25	248.38	248.3	248.46	248.33	248.51	248.45	248.17	248.55
Number of splices: Total |	19813891	24416493	23645522	28566668	27744988	30656176	26114784	25520154	24101556	21446254	15927136	21178894	33091966	31868103	21048927	20430524	16014946	16182007	23669230	28383725	27198047	21121615	17490427	20290339	28776696	32439734	34171620	17481001	17104678	17883439	21851042	26039620	27123053	13864466	16640815	17122557	22674238	21304812	26677038	19122055	17558951	14607314	23114943	21780777	19799188
Number of splices: Annotated (sjdb) |	19322516	23903979	23093463	27977184	27156610	29985251	25388228	24792933	23404215	21097289	15673463	20832808	32616999	31220821	20501270	20067708	15727024	15884796	23278650	27701549	26820511	20770839	17193758	19937396	28209158	32087508	33760245	17191120	16816913	17574877	21472225	25651009	26698585	13628012	16372305	16854150	22344688	20950892	26333117	18811337	17260597	14345336	22637642	21307116	19436891
Number of splices: GT/AG |	19586943	24153480	23390924	28323346	27499590	30381157	25869946	25292101	23882973	21234358	15760855	20973609	32874837	31505134	20820039	20235673	15866021	16018554	23459543	28210451	26969893	20923424	17324695	20099141	28479845	32275507	33851643	17311938	16941171	17707099	21669032	25816213	26964841	13730303	16488947	16962610	22490714	21125649	26489543	18946981	17394744	14461490	22933610	21593454	19631885
Number of splices: GC/AG |	138084	167376	138469	155776	152466	168720	171070	149887	149723	125787	101579	115855	144064	295375	177488	111554	84832	88082	160577	114088	175124	113002	95588	106552	233818	117988	262748	94389	93355	101391	129145	171182	94548	75346	92157	90886	139205	134223	141450	99395	91472	81864	131388	133327	118274
Number of splices: AT/AC |	17452	20995	20584	17336	17493	19655	14425	15164	13299	16988	11206	16364	11761	13116	8387	16134	11344	12437	8553	7574	8896	15054	12356	15396	11258	6961	11531	12640	12205	13074	8040	9402	8491	9583	11443	12019	8862	9435	9698	13391	12035	10313	9215	10291	8785
Number of splices: Non-canonical |	71412	74642	95545	70210	75439	86644	59343	63002	55561	69121	53496	73066	61304	54478	43013	67163	52749	62934	40557	51612	44134	70135	57788	69250	51775	39278	45698	62034	57947	61875	44825	42823	55173	49234	48268	57042	35457	35505	36347	62288	60700	53647	40730	43705	40244
Mismatch rate per base, % |	0.0054	0.0051	0.0051	0.0051	0.0049	0.0049	0.0046	0.0048	0.0044	0.0053	0.0051	0.0056	0.0048	0.0048	0.0051	0.0054	0.0058	0.0055	0.0046	0.0049	0.0048	0.0057	0.005	0.0049	0.0048	0.0052	0.0047	0.0053	0.0057	0.0055	0.0051	0.0049	0.0051	0.0053	0.0053	0.0049	0.0047	0.0049	0.0045	0.0044	0.0047	0.0043	0.0037	0.0045	0.0034
Deletion rate per base |	0.0003	0.0002	0.0003	0.0002	0.0002	0.0002	0.0002	0.0002	0.0002	0.0002	0.0003	0.0002	0.0001	0.0002	0.0002	0.0003	0.0003	0.0003	0.0001	0.0002	0.0002	0.0003	0.0003	0.0003	0.0002	0.0001	0.0001	0.0003	0.0002	0.0002	0.0002	0.0002	0.0001	0.0003	0.0002	0.0003	0.0002	0.0002	0.0002	0.0003	0.0003	0.0003	0.0002	0.0002	0.0002
Deletion average length |	2.14	2.13	2.13	2.14	2.08	2.11	2.06	2.06	2.01	2.06	2.01	2.07	2.03	1.92	1.89	2.1	2.13	2.15	1.85	2.01	1.96	2.07	2.11	2.08	2.02	1.88	1.84	2.11	2.08	2.08	1.97	1.9	1.88	2.08	2.11	2	1.94	2.02	2.15	2	1.99	2.03	1.82	1.85	1.92
Insertion rate per base |	0.0003	0.0003	0.0003	0.0002	0.0003	0.0002	0.0002	0.0002	0.0002	0.0003	0.0004	0.0003	0.0002	0.0002	0.0002	0.0003	0.0003	0.0003	0.0002	0.0002	0.0002	0.0003	0.0003	0.0003	0.0002	0.0001	0.0002	0.0003	0.0003	0.0003	0.0002	0.0002	0.0002	0.0003	0.0003	0.0003	0.0002	0.0002	0.0002	0.0003	0.0003	0.0003	0.0002	0.0002	0.0002
Insertion average length |	1.91	1.87	1.88	1.81	1.92	1.84	1.73	1.79	1.75	1.85	1.91	1.8	1.65	1.76	1.83	1.9	1.9	1.89	1.82	1.77	1.75	1.9	1.86	1.88	1.82	1.61	1.77	1.88	1.86	1.91	1.78	1.76	1.61	1.86	1.79	1.88	1.72	1.77	1.71	1.85	1.8	1.84	1.72	1.79	1.73
MULTI-MAPPING READS:
Number of reads mapped to multiple loci |	419365	444815	598493	738905	706591	788036	962446	1075149	1169908	474877	470824	472308	594736	787777	589904	458880	390644	499439	355515	564431	463145	470554	410441	609584	603727	464145	529931	514039	439532	481543	485918	525513	715068	388941	380962	370280	465103	703118	492872	451644	561986	474690	502344	615806	1771826
% of reads mapped to multiple loci |	0.0148	0.0143	0.0174	0.024	0.0223	0.0225	0.0301	0.0324	0.0388	0.0158	0.0196	0.015	0.0174	0.0227	0.0236	0.0149	0.0169	0.0189	0.0151	0.0168	0.0168	0.0152	0.0163	0.0195	0.0196	0.0161	0.0164	0.0199	0.0175	0.0181	0.0192	0.019	0.024	0.0174	0.0154	0.014	0.0187	0.0275	0.0183	0.0152	0.02	0.0192	0.0179	0.0234	0.0637
Number of reads mapped to too many loci |	17198	14919	20542	14574	14550	18020	10667	11724	8412	19464	10848	12000	6964	11189	7533	15047	10399	11113	4567	3550	4898	13952	11446	17338	7543	3710	6191	8248	7911	8655	5534	6094	3976	12706	12918	9495	4660	6979	5432	10272	8250	9756	5344	7811	4315
% of reads mapped to too many loci |	0.0006	0.0005	0.0006	0.0005	0.0005	0.0005	0.0003	0.0004	0.0003	0.0006	0.0005	0.0004	0.0002	0.0003	0.0003	0.0005	0.0004	0.0004	0.0002	0.0001	0.0002	0.0005	0.0005	0.0006	0.0002	0.0001	0.0002	0.0003	0.0003	0.0003	0.0002	0.0002	0.0001	0.0006	0.0005	0.0004	0.0002	0.0003	0.0002	0.0003	0.0003	0.0004	0.0002	0.0003	0.0002
UNMAPPED READS:
% of reads unmapped: too many mismatches |	0	0	0	0	0	0	0	0	0	0	0	0	0	0	0	0	0	0	0	0	0	0	0	0	0	0	0	0	0	0	0	0	0	0	0	0	0	0	0	0	0	0	0	0	0
% of reads unmapped: too short |	0.0409	0.0368	0.0481	0.0522	0.0469	0.0448	0.1111	0.0786	0.0855	0.0326	0.0615	0.04	0.1241	0.0963	0.0941	0.0327	0.0445	0.0399	0.0883	0.0724	0.0812	0.0463	0.0578	0.056	0.0843	0.1034	0.0646	0.0495	0.0363	0.0557	0.0981	0.0698	0.1392	0.08	0.0885	0.0618	0.1283	0.113	0.1148	0.0794	0.0686	0.0705	0.1003	0.107	0.1047
% of reads unmapped: other |	0.0011	0.0011	0.0013	0.001	0.001	0.0011	0.001	0.0009	0.001	0.0009	0.0008	0.0008	0.0009	0.0009	0.001	0.0009	0.0008	0.0012	0.0009	0.0007	0.0009	0.0011	0.0009	0.0008	0.0011	0.0007	0.0008	0.0008	0.0009	0.0009	0.0008	0.0007	0.001	0.0009	0.0009	0.0008	0.0008	0.0008	0.0008	0.0009	0.0007	0.0008	0.0008	0.0009	0.0005
CHIMERIC READS:
Number of chimeric reads |	0	0	0	0	0	0	0	0	0	0	0	0	0	0	0	0	0	0	0	0	0	0	0	0	0	0	0	0	0	0	0	0	0	0	0	0	0	0	0	0	0	0	0	0	0
% of chimeric reads |	0	0	0	0	0	0	0	0	0	0	0	0	0	0	0	0	0	0	0	0	0	0	0	0	0	0	0	0	0	0	0	0	0	0	0	0	0	0	0	0	0	0	0	0	0

## Sheet: Table  S3
Table S3. Gene_expression_raw_counts_matrix. Library names were developmental stage plus tissue plus family ID. B stands for breast muscle and A stands for abdominal fat.
Ensembl_gene_id	E12B07	E12B14	E12B19	E17B07	E17B14	E17B19	D01B07	D01B14	D01B19	D07A07	D07A14	D07A19	D07B07	D07B14	D07B19	D21A07	D21A14	D21A19	D21B07	D21B14	D21B19	D56A07	D56A14	D56A19	D56B07	D56B14	D56B19	D98A07	D98A14	D98A19	D98B07	D98B14	D98B19	D140A07	D140A14	D140A19	D140B07	D140B14	D140B19	D180A07	D180A14	D180A19	D180B07	D180B14	D180B19
ENSGALG00000029657	0	0	29	17	0	15	0	2	0	3	28	21	26	8	0	6	2	13	0	8	0	19	18	2	0	8	0	2	9	0	8	9	22	0	0	0	0	0	0	27	19	0	0	19	14
ENSGALG00000018335	11	14	2	8	10	8	0	3	0	0	1	2	0	1	1	0	0	0	0	0	1	1	3	1	1	0	0	0	0	0	0	0	0	0	0	0	0	0	0	0	0	0	0	0	0
ENSGALG00000027608	560	695	1151	1736	1578	1652	1613	1769	1471	655	908	1089	2312	873	450	826	913	749	1091	1769	1404	856	569	854	1375	2542	1871	551	439	578	1739	1372	2813	398	436	484	1622	1171	2359	785	540	444	1447	1448	1307
ENSGALG00000050225	4	4	0	0	4	3	0	0	0	0	0	1	0	0	0	3	3	4	4	0	0	4	0	0	0	0	0	0	1	0	0	0	0	0	0	0	0	0	0	0	0	0	0	0	0
ENSGALG00000031381	316	417	751	283	388	406	273	366	230	675	783	915	237	144	130	1278	813	857	200	351	178	958	1107	1195	309	242	345	899	1029	1369	261	337	297	1229	1112	1261	283	230	278	1589	1240	1228	269	336	268
ENSGALG00000050223	2	0	9	10	5	12	0	0	0	2	0	0	0	0	3	3	0	2	0	0	0	3	0	0	0	0	0	0	3	0	0	0	0	0	4	0	0	0	0	0	0	2	0	4	0
ENSGALG00000050220	0	0	0	0	0	0	0	0	0	7	0	3	0	0	0	0	2	2	0	0	0	0	0	0	0	0	0	0	0	0	0	0	0	0	0	0	0	0	0	0	0	0	0	0	3
ENSGALG00000050221	0	0	2	0	0	0	0	0	0	0	0	0	0	0	0	0	0	0	0	0	0	0	0	0	0	0	0	0	0	0	0	0	0	0	0	0	0	0	0	0	0	0	0	0	0
ENSGALG00000035841	10199	11317	11068	5423	1912	6280	3621	4221	3588	4109	4496	8002	2031	4714	4122	6011	6733	6314	2958	2579	3178	9753	6776	7354	988	1176	3752	5080	7235	6682	1814	4749	1785	3855	6338	5652	2461	2698	2486	6801	6410	2838	3013	3713	2478
ENSGALG00000040292	0	0	0	0	0	0	0	0	0	0	0	0	0	0	0	0	0	0	0	0	0	0	0	0	0	0	0	0	0	0	2	0	0	0	0	0	0	0	0	0	0	0	0	0	0
ENSGALG00000014964	143	127	167	55	58	50	34	32	32	165	80	122	18	26	20	69	47	107	29	61	43	98	55	72	43	29	40	24	65	43	26	41	6	89	66	30	70	50	34	64	40	30	145	54	32
ENSGALG00000014965	20	2	9	40	24	136	17	0	42	5	0	0	13	194	41	5	3	2	0	0	5	8	0	9	7	0	3	0	0	0	0	0	0	0	0	0	0	0	0	0	0	0	0	0	0
ENSGALG00000014962	3	4	0	0	0	4	7	2	7	43	63	34	0	5	0	52	106	155	8	3	14	15	66	60	8	7	4	51	18	4	10	16	0	8	45	7	12	23	0	20	38	11	17	43	0
ENSGALG00000014963	937	1196	890	386	613	703	353	353	352	1648	996	2048	156	223	167	1239	845	947	187	92	163	846	982	899	200	64	230	1008	1840	831	147	281	80	415	451	436	96	199	158	711	554	544	177	189	96
ENSGALG00000026594	75	111	145	97	123	117	113	100	125	16	30	30	40	90	171	0	8	0	101	64	146	6	0	15	110	8	112	0	0	0	138	64	43	0	0	0	246	309	97	0	0	0	431	756	242
ENSGALG00000054582	442	41	42	23	8	231	47	127	121	14	4	4	1	2	7	32	7	2	12	0	1	1	1	25	20	0	15	2	1	41	2	2	12	18	0	15	20	1	10	9	0	49	14	0	9
ENSGALG00000014979	0	0	2	0	0	0	0	0	0	93	13	0	0	0	0	4	0	0	0	0	0	0	0	0	0	0	0	0	0	0	0	0	0	0	0	0	0	0	0	0	0	3	0	0	0
ENSGALG00000014991	2371	2992	3176	418	1051	1049	192	392	732	473	852	1303	188	390	311	733	406	746	174	274	126	601	384	1291	319	10	417	370	412	302	106	34	42	30	273	341	82	11	95	257	265	99	229	87	101
ENSGALG00000051082	2265	2790	3605	1363	1968	1700	602	862	760	1018	1312	1584	272	423	355	863	598	878	148	314	264	637	675	1268	246	82	354	533	477	370	184	211	39	413	270	295	89	79	65	549	415	361	184	152	85
ENSGALG00000003604	212	221	238	395	331	347	125	187	198	167	81	131	112	159	115	119	147	145	31	19	50	95	123	127	77	64	68	90	72	129	45	31	38	24	61	48	11	34	39	43	28	60	32	48	12
ENSGALG00000003657	33	58	43	6	12	4	13	0	0	65	21	16	0	0	0	2	6	42	0	0	0	0	10	23	4	0	0	0	0	71	0	0	0	0	0	12	0	0	0	0	0	14	0	0	0
ENSGALG00000003665	741	860	1116	485	365	517	358	488	346	801	1089	1296	353	228	143	960	797	1289	112	229	131	1067	849	845	212	213	179	842	690	1001	281	160	301	565	524	684	94	166	135	1116	640	803	117	160	88
ENSGALG00000026077	1939	2837	4600	9742	6221	9175	1365	2345	1634	1638	2231	2615	292	272	246	1006	1107	1465	94	153	114	1082	1646	1945	190	151	151	761	1987	3499	148	399	719	2654	4830	6721	108	883	254	3887	4272	4571	263	716	139
ENSGALG00000048771	2750	2821	3008	2609	2832	2502	1317	1910	1925	1512	762	939	862	451	360	607	678	547	370	198	329	993	917	998	438	616	353	624	583	760	543	349	672	375	582	536	242	393	237	517	422	421	178	292	187
ENSGALG00000037709	433	568	1261	652	593	693	234	328	251	765	1006	937	361	148	136	500	663	727	107	388	168	745	513	439	226	209	176	394	455	829	110	200	278	393	377	915	221	208	282	591	543	403	207	156	127
ENSGALG00000000146	1334	1202	1060	763	1025	956	504	649	383	700	127	558	419	591	381	692	468	486	352	149	334	822	355	600	388	152	468	366	493	384	343	598	241	244	265	206	283	332	230	225	234	219	214	386	284
ENSGALG00000030512	55	55	87	355	226	214	142	205	228	9	14	8	652	169	292	0	7	8	115	356	134	4	9	0	163	167	119	0	0	13	88	43	144	0	3	7	12	18	14	0	9	19	5	11	0
ENSGALG00000028210	58	38	28	970	572	628	1564	1245	1491	0	0	0	1394	838	680	3	22	5	376	1103	468	5	4	6	559	575	660	0	2	3	585	590	893	4	2	4	386	273	472	0	0	8	405	238	261
ENSGALG00000026315	195	250	283	150	160	163	39	86	96	199	302	334	84	69	5	247	161	200	56	154	81	132	95	173	89	67	79	125	196	166	6	84	127	166	92	175	40	62	0	200	106	126	4	71	56
ENSGALG00000011739	0	0	0	10	9	5	0	3	3	0	0	2	0	0	0	0	0	0	0	0	0	0	0	4	0	0	0	0	0	0	0	0	0	0	0	0	0	0	0	0	0	0	0	0	0
ENSGALG00000037124	5	5	3	3	5	10	0	3	0	0	24	5	0	0	0	13	8	0	0	0	0	25	15	17	0	0	0	5	0	0	0	0	0	0	6	0	3	0	0	11	7	0	0	0	0
ENSGALG00000007494	723	722	996	614	532	633	470	490	532	437	367	505	242	434	261	558	354	442	143	290	156	476	346	553	210	35	238	330	394	439	129	205	114	326	289	432	175	188	133	399	364	380	199	190	181
ENSGALG00000007516	451	457	169	177	194	254	89	104	91	276	59	103	32	87	58	212	116	70	64	4	47	165	156	103	63	7	39	85	173	88	53	82	31	100	130	93	45	122	60	78	66	57	57	65	57
ENSGALG00000032992	1004	1288	689	1432	1492	1850	719	743	651	768	220	353	166	547	342	150	345	127	197	15	156	106	773	736	271	84	416	528	520	723	249	306	96	269	470	314	209	209	185	404	389	312	171	250	168
ENSGALG00000031255	116	399	390	270	323	336	388	1578	157	494	263	274	663	151	93	44	212	60	691	293	356	26	12	55	656	653	431	29	70	36	154	152	136	8	6	25	311	51	117	21	56	16	145	377	154
ENSGALG00000033938	581	712	938	593	673	741	23	510	297	703	479	697	282	241	283	545	775	539	149	193	138	771	865	1149	178	88	204	802	61	576	304	186	216	31	511	65	170	274	265	692	730	717	223	237	164
ENSGALG00000012322	128	74	65	11	22	44	0	2	14	8	7	0	0	0	4	3	0	0	0	0	0	2	0	0	4	0	0	0	7	0	0	0	0	0	5	0	0	0	0	0	0	0	0	0	0
ENSGALG00000052007	44	16	36	3	14	20	0	0	11	0	10	0	0	5	5	0	0	0	0	0	0	0	0	0	0	0	0	0	0	0	0	0	0	0	0	0	0	0	0	0	0	0	0	0	0
ENSGALG00000007404	1203	1854	1942	726	1224	1311	299	350	399	1877	1362	2383	226	223	208	970	682	1104	120	132	147	1117	1230	1429	153	136	200	1716	1113	1636	177	212	101	1090	1113	1580	144	221	168	1585	1384	1374	223	252	191
ENSGALG00000037523	0	3	0	0	2	0	0	0	0	0	0	0	4	0	0	0	0	0	0	0	0	0	0	0	0	0	0	0	0	0	0	0	0	0	0	0	0	0	0	0	0	0	0	0	0
ENSGALG00000050914	3	0	0	4	3	3	0	5	0	31	21	15	0	0	0	6	0	0	3	3	2	0	7	0	2	0	0	0	0	8	0	0	0	0	0	0	0	0	0	0	0	0	0	2	0
ENSGALG00000050915	0	0	0	0	0	3	0	0	0	8	0	4	0	0	0	0	0	17	0	0	0	0	5	13	2	0	0	3	11	0	9	0	2	0	2	10	0	0	5	0	0	0	0	7	0
ENSGALG00000050911	0	0	0	0	0	0	0	0	0	0	0	0	0	0	0	0	0	0	0	0	0	0	0	0	0	0	0	0	0	0	0	0	0	0	2	0	0	0	0	0	0	0	0	0	0
ENSGALG00000050912	35	59	33	17	25	30	0	7	0	19	22	14	0	0	8	13	20	16	0	0	6	8	8	8	9	0	2	2	7	4	0	7	0	0	6	2	0	6	2	13	2	4	0	6	3
ENSGALG00000050913	0	0	0	0	0	0	0	0	0	0	0	6	0	0	2	0	9	0	0	0	5	0	0	0	3	0	0	0	0	0	0	0	0	0	3	0	0	0	0	0	0	0	0	0	0
ENSGALG00000050918	6	0	0	0	0	6	0	0	0	1	2	0	0	0	0	0	1	1	0	0	0	0	0	0	0	0	0	3	6	0	0	0	1	0	0	0	0	0	0	0	0	0	0	0	0
ENSGALG00000054219	38	8	9	9	2	0	0	0	0	2	15	0	0	17	13	2	0	0	0	0	0	5	0	0	0	0	0	6	0	0	0	2	0	0	6	0	0	0	0	6	0	0	0	0	0
ENSGALG00000054218	0	0	0	0	0	0	0	0	0	3	0	0	0	0	0	0	0	0	0	0	0	0	0	0	0	0	0	0	0	0	0	0	0	0	0	0	0	0	0	0	0	0	0	0	0
ENSGALG00000054213	10	6	0	0	0	0	0	4	0	0	0	0	0	0	0	0	0	0	0	0	4	2	7	0	0	0	0	0	0	0	0	0	0	0	0	0	0	0	4	0	0	0	15	0	0
ENSGALG00000054211	0	0	0	0	0	0	0	0	0	0	0	0	0	0	0	0	2	0	0	0	0	0	0	0	0	0	0	0	0	0	0	0	0	0	0	0	0	0	0	0	0	0	0	0	0
ENSGALG00000054217	5	0	0	0	0	0	0	0	0	0	0	0	0	1	1	0	0	0	0	0	0	0	0	0	0	0	0	0	0	0	0	0	0	0	0	0	0	0	0	0	0	0	0	0	0
ENSGALG00000054214	6	0	0	0	0	2	7	0	2	2	3	13	0	0	0	5	2	2	4	0	0	6	0	8	5	0	0	0	0	0	0	2	0	3	3	0	5	0	2	0	2	0	3	0	0
ENSGALG00000011498	489	529	686	433	412	477	657	518	540	778	452	564	185	347	174	828	522	388	223	379	241	624	402	841	311	35	311	480	531	562	137	194	51	510	622	503	204	238	205	720	638	553	341	324	280
ENSGALG00000019622	398	302	241	1316	1266	1042	670	601	422	117	43	47	47	30	68	20	65	25	28	5	12	34	11	24	32	0	16	10	13	10	58	19	0	24	16	26	29	27	51	0	14	9	27	18	13
ENSGALG00000052964	0	2	2	2	0	6	0	0	0	0	2	0	0	0	0	4	0	0	0	0	0	0	0	0	0	0	0	0	0	0	0	0	0	0	0	1	0	0	0	0	0	0	2	0	0
ENSGALG00000054787	9	7	8	3	2	5	0	0	0	0	10	0	0	0	0	3	0	0	0	0	0	0	3	0	0	0	0	0	0	0	0	0	0	0	3	0	0	2	0	0	5	0	0	0	0
ENSGALG00000042371	251	335	209	258	305	456	204	203	175	412	358	486	106	259	123	452	376	412	119	98	82	482	417	526	186	42	146	463	405	533	64	87	34	377	445	286	47	72	71	487	349	366	90	125	91
ENSGALG00000040363	314	478	477	293	422	421	456	619	613	5254	9499	5616	298	1078	541	15952	8809	7743	376	1549	604	16591	9267	13388	673	92	661	4155	4260	6325	491	656	182	6447	5930	6939	747	794	768	6248	6709	6708	692	966	732
ENSGALG00000011518	521	713	602	532	538	529	391	378	387	467	241	440	510	807	450	302	234	375	516	401	962	313	284	444	2	1004	3	309	272	293	414	854	806	154	225	151	667	603	766	256	178	159	532	670	522
ENSGALG00000039920	842	998	641	1107	972	1023	1025	1127	901	1236	626	1173	173	658	432	2726	1324	1410	403	90	218	1897	1760	3021	517	123	698	2028	1951	2088	729	343	96	1592	1790	1253	338	322	584	1457	1628	1371	276	249	239
ENSGALG00000043379	242	239	503	330	311	343	93	207	176	199	346	356	199	125	94	306	189	196	16	246	205	363	149	256	116	60	149	282	220	195	86	117	8	394	251	306	94	131	0	467	414	277	146	127	4
ENSGALG00000037533	25	30	25	15	18	15	1	7	5	6	0	4	3	10	2	0	0	0	0	0	5	4	0	0	0	0	2	0	6	0	0	0	0	2	0	0	0	0	0	0	0	0	0	0	0
ENSGALG00000017190	0	3	3	0	3	6	0	0	4	93	28	59	3	9	0	18	10	12	8	3	6	10	37	31	0	0	4	20	5	20	6	12	0	8	19	37	4	4	3	20	24	32	0	0	1
ENSGALG00000017197	4	0	4	0	0	0	0	2	0	0	0	2	0	0	0	0	0	0	0	0	0	0	0	0	0	0	0	0	0	0	0	0	0	4	3	3	0	0	3	0	0	0	0	0	0
ENSGALG00000016822	2	12	9	0	0	0	0	0	0	4	8	6	0	0	0	3	1	0	0	0	0	2	0	0	0	0	2	0	2	0	2	2	0	0	5	0	2	0	0	0	1	0	1	0	0
ENSGALG00000045914	0	0	5	0	0	0	0	0	0	0	0	0	0	0	0	0	0	0	0	0	0	0	0	0	0	0	0	0	0	0	0	0	0	0	0	0	0	0	0	0	0	0	0	0	0
ENSGALG00000007098	175	103	214	24	35	80	108	69	41	1828	1301	1812	20	447	202	3161	2139	1361	236	214	126	3140	1326	2089	248	24	123	1014	545	1421	200	213	6	984	1364	1766	125	228	93	1065	1971	1471	70	239	74
ENSGALG00000007025	88	95	158	65	90	102	43	104	98	439	533	416	29	50	47	933	672	379	43	36	16	645	434	699	70	4	86	561	516	435	70	149	19	517	629	485	67	68	86	824	656	367	73	90	77
ENSGALG00000049464	14	10	46	11	21	26	2	7	8	7	32	9	2	6	2	19	12	9	0	0	2	25	11	10	0	0	6	10	9	9	0	0	0	0	14	21	14	0	0	30	52	12	4	0	25
ENSGALG00000038806	16	20	10	8	6	6	0	5	4	16	30	8	2	0	5	15	25	15	0	0	7	31	4	16	9	0	4	7	5	0	0	7	3	16	3	3	5	0	5	19	14	9	3	2	0
ENSGALG00000042554	170	187	76	127	134	140	485	267	275	880	1005	708	599	290	195	1962	1451	1130	197	104	147	2353	1862	1490	293	61	183	1214	943	1412	130	126	43	666	1644	658	186	212	170	966	1109	800	133	170	125
ENSGALG00000042244	0	0	3	0	0	0	0	0	0	0	14	0	0	0	0	3	7	0	0	0	0	10	7	11	0	0	0	8	3	9	0	0	0	0	6	12	0	0	0	5	6	0	0	0	0
ENSGALG00000007917	184	128	241	81	199	322	40	45	41	39	8	25	18	34	35	9	11	15	7	18	9	12	15	46	14	6	48	10	10	16	23	21	0	4	6	0	8	8	4	0	0	10	9	0	4
ENSGALG00000007183	1340	1593	1926	825	850	918	642	554	661	1841	1624	2165	436	609	550	3594	1721	2121	652	770	579	3039	2506	3026	901	119	798	3344	2648	3778	335	661	260	2475	3324	3644	547	605	560	3301	3178	2589	688	782	565
ENSGALG00000007161	334	225	344	178	223	220	217	170	212	744	220	456	56	115	121	554	345	296	138	110	107	391	375	491	189	30	156	362	329	321	122	120	50	170	292	277	83	144	92	264	182	272	136	86	71
ENSGALG00000035940	148	219	157	91	90	124	56	42	72	251	43	201	16	38	33	148	118	77	35	18	27	173	122	135	42	7	64	155	168	182	51	34	14	70	119	111	20	46	32	53	57	107	27	25	26
ENSGALG00000046759	2	7	0	0	3	3	3	0	0	0	0	0	0	0	0	0	0	0	0	0	9	0	0	0	10	0	15	0	0	0	0	3	5	0	0	0	0	2	0	0	0	0	0	0	0
ENSGALG00000046758	0	0	0	0	0	0	0	0	0	0	0	0	0	0	0	0	0	0	0	0	0	0	0	0	0	0	0	0	0	0	0	0	0	0	0	0	0	0	0	0	2	0	0	0	0
ENSGALG00000046757	2	15	13	1	8	13	2	13	3	10	2	5	1	4	2	3	1	1	0	1	0	0	1	13	3	0	2	0	3	0	0	0	0	0	5	0	0	0	1	0	3	7	0	2	0
ENSGALG00000046756	0	0	0	0	0	0	0	0	0	0	0	0	0	0	0	0	0	0	0	0	0	0	0	0	0	0	0	0	0	0	0	0	0	0	0	0	9	0	0	0	0	0	0	0	0
ENSGALG00000046753	0	0	0	0	0	0	0	0	0	2	0	3	0	0	0	5	0	0	0	0	0	0	0	0	0	0	0	0	0	0	0	0	0	4	2	0	2	0	0	0	0	0	0	0	0
ENSGALG00000046752	2	7	10	0	0	0	0	0	0	0	0	0	0	0	0	0	0	0	0	0	0	0	0	0	0	0	0	0	0	0	0	0	0	0	0	0	0	0	0	0	0	0	0	0	0
ENSGALG00000009616	5	6	16	2	6	8	0	2	0	17	18	2	0	0	0	0	0	0	0	0	0	5	0	14	0	0	0	0	2	4	0	0	0	0	2	0	0	0	0	2	0	0	0	0	0
ENSGALG00000009627	1154	1571	1386	683	831	1085	485	489	403	1190	628	869	114	404	233	870	650	588	185	192	145	609	532	646	339	17	340	472	625	438	211	208	47	432	411	402	111	168	207	588	442	414	180	146	85
ENSGALG00000009612	10153	10456	15020	5889	6282	6521	1461	2248	1941	2465	4599	4187	373	1840	1367	4747	2260	1470	697	1316	638	2106	1445	4043	835	226	1477	1105	898	866	1294	1409	264	792	998	1258	447	592	430	1364	1371	1517	1571	1424	1355
ENSGALG00000009615	525	636	783	327	316	420	226	293	265	349	314	502	68	225	139	614	257	318	57	348	129	458	257	389	137	38	214	362	448	419	114	199	81	433	417	443	120	178	150	878	1055	524	218	200	149
ENSGALG00000041996	13	11	13	36	7	21	169	109	118	20	27	4	18	8	10	7	10	7	9	45	7	23	8	23	8	3	72	0	4	2	4	37	5	14	3	12	71	55	129	0	10	5	49	14	122
ENSGALG00000009678	2043	2496	3230	978	1273	1475	606	589	579	747	634	894	639	724	401	1263	672	692	526	447	656	720	597	1019	602	696	650	983	738	1112	619	1043	715	461	816	923	732	819	624	688	768	584	640	754	1036
ENSGALG00000052518	10	0	0	15	0	14	0	3	0	0	0	0	0	0	3	0	0	0	0	0	0	0	0	0	0	0	0	0	0	0	0	0	0	0	0	9	0	2	0	0	0	0	0	0	0
ENSGALG00000009645	212	414	207	519	508	595	462	543	368	120	73	106	96	249	122	110	111	76	64	89	29	150	122	72	112	12	134	73	152	90	68	68	32	69	80	96	74	140	98	52	117	69	89	87	98
ENSGALG00000015845	0	3	0	0	4	0	0	0	2	0	0	0	0	0	0	0	0	0	0	0	0	6	0	0	5	0	0	0	0	0	0	0	0	0	6	0	0	0	5	0	3	0	0	0	0
ENSGALG00000009687	139	175	119	349	223	383	70	29	43	30	94	24	10	42	13	134	48	86	16	22	30	234	80	200	27	5	57	92	56	84	26	20	4	61	27	43	28	74	28	48	68	41	13	7	6
ENSGALG00000009690	1653	4390	2745	1177	2003	2099	762	2056	3198	2781	998	6559	227	717	1191	285	371	320	55	570	66	579	256	792	184	58	295	150	177	227	170	135	39	56	173	180	63	208	71	99	64	58	165	113	30
ENSGALG00000015841	2	1	0	2	6	0	0	0	0	0	0	0	0	0	0	0	0	0	0	8	0	0	11	0	0	0	0	6	10	0	2	0	0	6	2	0	0	0	2	8	1	0	5	2	0
ENSGALG00000046585	0	0	21	6	15	9	3	0	0	0	12	0	5	2	0	0	0	0	0	0	2	7	60	5	0	0	0	20	3	43	0	3	12	30	73	93	0	31	0	67	105	50	4	75	0
ENSGALG00000043988	16	17	24	12	6	16	0	13	11	9	4	8	9	7	6	7	8	8	3	0	5	0	11	27	8	14	16	0	8	6	0	22	12	0	5	0	0	11	0	6	11	7	0	9	9
ENSGALG00000047402	0	0	0	0	0	0	0	0	0	0	0	0	0	0	0	0	0	0	0	0	0	0	0	0	5	0	0	0	0	0	0	0	0	0	0	0	0	0	0	0	0	0	0	0	0
ENSGALG00000047400	0	0	0	0	0	0	0	0	0	2	0	0	0	0	0	0	0	0	0	0	0	0	0	0	0	0	0	0	0	0	0	0	0	0	0	0	0	0	0	0	0	0	0	0	0
ENSGALG00000047401	0	0	0	0	0	0	0	0	0	0	0	0	0	0	0	0	0	0	0	0	0	0	0	0	0	0	0	0	0	0	0	0	0	4	0	0	0	0	0	0	0	0	0	0	0
ENSGALG00000047406	2	2	5	0	0	0	0	2	0	0	0	6	0	0	0	0	2	0	0	0	0	0	0	9	0	0	0	0	2	0	0	0	0	0	0	0	0	0	0	0	0	0	0	0	0
ENSGALG00000047405	0	0	0	0	0	0	0	0	0	0	0	9	0	0	0	0	0	0	0	0	0	0	0	0	0	0	0	0	0	0	0	0	0	0	0	0	0	0	2	0	0	0	0	0	0
ENSGALG00000024498	5	2	9	4	10	10	0	2	3	1	0	2	1	1	1	4	6	8	4	8	2	2	0	4	2	0	1	4	2	0	0	1	0	0	0	0	2	2	1	0	0	0	0	0	0
ENSGALG00000051637	0	0	0	0	0	0	0	0	0	5	0	0	0	0	0	0	0	0	0	0	0	0	0	0	0	0	0	0	0	0	0	0	0	0	0	0	0	0	0	0	0	0	0	0	0
ENSGALG00000004120	2	1	1	0	0	0	0	0	0	1	0	0	0	0	0	8	1	0	0	0	0	5	0	4	5	3	0	0	2	0	0	0	8	2	1	0	0	2	6	0	0	0	0	2	0
ENSGALG00000051633	0	0	0	0	0	0	0	0	0	0	1	0	0	0	0	0	0	0	0	0	0	0	0	0	0	0	0	0	0	0	0	0	0	0	0	0	0	0	0	0	0	0	0	0	0
ENSGALG00000015119	3580	4071	430	1586	1951	256	927	100	121	1600	1007	84	272	678	492	228	85	1070	315	457	304	1388	900	1774	68	77	482	95	1102	1076	360	584	118	136	1161	1369	240	356	333	1716	1674	1288	459	499	315
ENSGALG00000033244	59	50	46	85	74	58	68	151	71	13	34	46	20	24	16	36	49	38	36	35	36	62	14	37	30	0	41	62	17	12	16	30	17	15	8	8	33	31	20	46	14	0	14	44	18
ENSGALG00000043669	1146	947	778	747	784	978	439	477	332	1341	335	577	126	514	296	993	722	633	310	67	265	1101	753	1065	268	35	500	569	1080	1077	292	377	53	460	1051	487	135	436	287	560	384	661	218	311	159
ENSGALG00000052925	2	0	0	0	0	0	0	0	0	0	0	0	0	0	0	0	0	0	0	0	0	0	0	0	0	0	0	0	0	0	0	0	0	0	0	0	0	0	0	0	0	0	0	0	0
ENSGALG00000021074	46	29	53	255	198	162	192	283	84	95	128	144	42	22	62	196	355	268	76	155	136	563	1373	547	97	189	94	759	546	3644	264	305	1248	1357	1239	676	309	374	339	2107	981	321	275	301	181
ENSGALG00000051585	8	16	20	2	8	11	0	0	2	3	14	2	0	0	0	6	10	2	0	0	0	8	4	0	4	0	7	5	0	0	5	3	10	0	0	0	0	0	2	5	5	2	10	0	0
ENSGALG00000003206	232	285	361	243	174	223	191	134	145	84	63	74	105	79	64	70	76	65	20	29	49	101	95	85	48	43	50	81	95	85	86	97	216	64	78	143	136	77	71	79	63	85	117	66	75
ENSGALG00000049890	78	77	80	77	128	172	0	3	9	0	0	0	2	2	5	0	13	0	0	0	0	0	0	0	0	4	0	0	0	6	0	0	0	0	0	0	0	0	0	0	2	0	0	2	0
ENSGALG00000003250	116	167	195	62	59	72	49	40	76	72	112	193	60	50	38	59	75	76	19	90	34	65	53	59	49	46	34	63	94	67	60	46	71	67	63	123	36	49	56	88	103	113	38	45	43
ENSGALG00000015132	4182	4172	3637	1411	1552	2162	224	206	206	454	276	385	45	192	104	155	147	215	44	91	52	114	207	298	39	35	102	303	485	277	103	128	33	101	126	58	32	140	35	298	152	140	82	94	60
ENSGALG00000015140	0	0	5	0	0	0	0	0	0	684	111	3	0	0	0	0	0	0	0	0	0	0	0	0	0	0	0	0	0	0	0	0	0	7	0	0	0	0	0	0	0	0	0	0	0
ENSGALG00000011221	477	644	710	943	814	802	1250	1511	612	3990	3147	6103	742	616	264	1496	1027	4645	268	724	315	1185	818	1411	363	144	530	3280	1892	2928	265	417	139	950	1191	1134	407	496	352	1762	1101	878	761	483	1302
ENSGALG00000049661	5	0	2	0	6	0	0	0	0	2	0	0	0	0	0	0	0	0	0	0	0	0	0	0	0	0	0	0	0	0	0	0	0	4	0	0	0	0	0	0	0	0	0	0	0
ENSGALG00000049662	0	3	2	0	7	8	0	3	0	5	0	0	0	0	0	0	0	0	0	0	0	0	2	0	0	0	0	0	0	0	0	0	0	7	0	0	0	2	0	0	0	4	0	0	0
ENSGALG00000049664	0	0	7	0	0	0	0	0	0	0	0	0	0	0	0	0	0	5	0	0	0	0	0	0	3	0	0	3	0	0	0	0	0	0	0	0	0	0	0	0	0	0	0	0	4
ENSGALG00000049666	0	0	0	0	0	0	0	0	0	17	17	13	2	0	0	47	10	20	0	2	0	26	27	10	0	0	0	13	11	0	0	0	0	14	33	46	0	0	8	0	27	31	0	2	0
ENSGALG00000049667	10	6	0	0	0	0	0	0	3	0	0	0	0	0	0	0	0	2	0	0	0	0	0	0	3	0	0	3	0	0	0	0	0	0	0	2	0	0	0	0	0	0	0	0	0
ENSGALG00000049669	4	0	3	0	0	0	4	0	0	2	0	0	0	0	0	0	0	0	0	0	0	6	0	0	0	0	0	0	0	0	0	0	0	0	0	0	0	0	0	0	0	0	0	0	0
ENSGALG00000034860	1690	2114	1165	5384	2853	2950	1404	774	1164	284	44	103	58	964	280	30	16	28	51	58	47	56	48	17	110	22	97	19	29	10	85	31	13	10	37	0	48	60	20	38	15	3	25	58	13
ENSGALG00000042159	44	66	103	62	53	79	92	50	78	20	22	29	30	8	20	0	14	0	11	0	4	2	0	4	9	4	18	0	0	0	3	6	6	0	3	0	0	3	8	0	0	7	0	7	0
ENSGALG00000009533	527	493	824	342	407	415	464	592	431	253	385	396	201	574	252	424	343	225	417	607	280	360	207	299	647	80	461	260	148	160	122	243	46	147	216	215	235	190	129	388	255	262	274	242	197
ENSGALG00000048373	5	10	10	0	0	7	3	0	4	3	21	8	3	50	22	0	15	3	18	45	45	3	0	0	54	0	19	0	0	0	12	18	3	0	8	0	53	6	33	0	0	0	20	56	27
ENSGALG00000052162	367	314	105	1013	902	1232	1042	898	721	362	128	174	155	1938	826	162	80	151	279	193	232	105	89	53	368	88	312	143	183	189	334	347	110	129	175	97	285	487	277	183	105	186	317	583	382
ENSGALG00000054759	599	567	643	1256	1178	1386	1417	1420	1353	1337	1086	1311	195	1965	1004	776	500	1375	565	635	500	601	539	799	1016	74	560	1536	1305	1902	640	470	146	1173	1169	1174	482	729	448	2355	1377	1613	825	1044	1204
ENSGALG00000043623	16	27	12	32	19	17	6	10	6	56	59	24	10	4	5	24	21	41	11	4	3	38	19	18	11	3	5	29	25	37	3	10	3	6	8	23	18	19	36	17	18	18	27	13	27
ENSGALG00000009549	5120	6322	7305	5081	5285	5706	5057	5781	4580	4426	3957	4863	1526	6451	4041	5307	3359	3563	4516	5695	3747	4009	2907	4500	7381	642	4838	4401	3889	3914	4083	4928	1428	3907	3758	4979	5094	7426	3970	5720	5311	5134	9211	8595	10750
ENSGALG00000050972	0	2	0	0	1	1	0	0	0	0	0	2	0	0	0	2	0	0	1	0	0	1	0	1	0	0	0	2	1	1	0	1	0	0	1	0	0	2	0	1	0	0	0	0	0
ENSGALG00000042723	11	8	8	5	6	17	10	3	3	11	0	1	9	19	8	11	6	14	14	30	13	14	8	2	7	11	10	7	13	13	30	12	6	3	6	5	12	7	3	6	7	6	18	21	9
ENSGALG00000032259	5	4	8	6	0	5	2	0	0	2	0	0	0	0	0	10	2	0	0	0	0	0	0	0	0	0	0	0	0	0	0	0	0	0	2	0	0	0	0	0	0	0	0	0	0
ENSGALG00000039108	5561	6512	5971	6207	5994	6940	3729	3903	3278	1926	1294	1758	2088	1988	975	2135	2559	1465	789	359	762	3283	3219	3672	997	1022	899	2062	1786	2518	1168	880	1721	2058	2866	2826	814	1139	966	2083	1697	1634	756	1166	940
ENSGALG00000037712	1602	2358	2552	2107	2393	2376	2778	2286	2271	1739	1942	2718	3338	3732	2456	2611	1998	2400	1365	1652	2082	2599	1943	2196	1954	3084	1581	2573	2087	2919	2665	2926	5009	2762	2520	3426	4302	4647	3848	3988	2807	2646	3960	3749	3513
ENSGALG00000001031	200	155	247	28	45	132	6	12	39	33	0	0	10	3	0	0	0	0	2	0	0	6	3	0	2	0	10	10	5	0	0	0	4	0	6	0	4	11	6	0	0	11	11	4	12
ENSGALG00000001028	163	133	236	19	35	65	2	10	30	949	392	27	0	0	0	15	6	16	4	2	2	27	43	29	6	6	8	6	7	6	2	6	4	6	4	0	10	0	0	0	2	8	4	4	0
ENSGALG00000047188	0	2	4	0	0	3	3	0	0	12	16	4	0	2	0	4	3	4	2	0	0	2	2	24	0	0	0	7	0	6	0	0	0	0	4	0	0	0	0	0	0	4	0	0	0
ENSGALG00000032717	0	0	2	0	0	0	0	0	0	38	67	67	0	0	0	61	45	64	0	0	8	61	200	57	12	17	16	47	421	74	9	35	46	622	178	691	0	25	8	669	462	405	3	86	7
ENSGALG00000040908	590	597	435	505	528	570	88	353	81	82	24	154	35	35	58	131	115	177	43	11	20	210	126	98	128	76	103	142	142	169	72	43	149	26	41	62	34	65	72	51	33	104	24	84	53
ENSGALG00000034478	4	6	12	0	0	4	0	3	3	74	73	56	21	0	0	128	273	266	15	14	49	38	72	137	38	37	9	32	508	37	70	1058	1335	510	357	203	32	42	148	164	697	53	101	470	67
ENSGALG00000053868	74	54	126	150	140	158	228	346	194	287	427	204	433	350	170	296	286	310	180	48	250	313	342	319	261	377	86	299	254	278	127	415	449	233	296	352	386	324	410	304	348	227	594	73	607
ENSGALG00000042533	269	171	323	109	160	312	101	78	62	165	49	120	56	141	107	106	87	128	44	22	75	121	161	215	137	33	122	79	99	140	68	44	31	84	93	83	82	57	31	81	122	100	61	37	23
ENSGALG00000043603	0	0	0	0	0	0	0	0	0	0	0	5	0	0	0	32	28	40	0	0	10	25	32	29	3	21	13	15	34	0	0	15	23	23	44	21	0	1	10	31	26	8	0	6	9
ENSGALG00000000944	25	1102	33	819	953	721	467	1266	433	21	1610	892	687	311	195	958	676	604	352	606	391	615	483	11	486	424	3	474	669	563	373	326	404	551	595	500	229	204	359	1080	738	383	349	389	217
ENSGALG00000018344	3	0	1	1	2	0	2	1	1	3	1	3	0	0	0	4	6	16	1	1	1	0	4	14	1	0	0	0	1	0	0	2	0	2	3	0	3	1	0	2	1	5	4	3	0
ENSGALG00000017098	319	335	483	259	200	240	114	102	159	408	329	530	96	192	122	340	230	278	213	382	254	233	185	345	229	45	333	173	179	148	105	216	31	188	165	219	241	185	298	300	180	174	312	307	148
ENSGALG00000052037	579	564	535	241	407	392	136	175	174	325	309	456	56	140	98	443	264	325	90	124	39	324	302	400	104	15	137	270	350	289	117	118	16	251	215	229	44	63	59	207	223	235	60	101	80
ENSGALG00000034376	6	2	557	495	460	635	213	287	264	401	98	263	91	175	160	319	274	182	93	26	59	304	371	402	91	22	166	229	279	344	159	132	44	357	378	344	80	128	125	372	316	276	105	107	99
ENSGALG00000030011	786	1083	748	546	682	619	353	377	559	1475	1052	1592	212	338	326	1992	1275	1498	229	198	156	2013	1341	2074	206	59	444	1481	1386	1150	212	365	90	1391	1346	1828	224	266	384	1769	1609	1217	269	359	221
ENSGALG00000050729	289	235	188	230	242	315	97	183	209	246	65	138	23	54	59	217	199	163	86	69	40	224	193	203	115	22	137	155	113	123	93	56	22	97	76	129	42	46	71	122	129	75	94	63	44
ENSGALG00000052945	87	142	278	56	122	157	78	106	74	100	93	89	77	57	24	97	123	130	15	44	32	152	185	286	27	20	24	96	66	121	48	25	111	176	132	261	28	99	50	226	234	203	63	90	66
ENSGALG00000032585	4	4	8	2	8	7	5	8	3	4	5	3	2	1	3	4	3	5	2	2	2	6	2	3	3	1	2	3	2	1	1	1	3	1	1	2	2	0	0	0	1	3	3	0	1
ENSGALG00000033402	1	1	1	0	1	1	2	2	1	0	0	1	2	2	2	1	0	0	0	0	1	2	0	0	0	0	0	1	0	0	1	1	0	0	0	0	0	1	1	1	1	0	0	0	0
ENSGALG00000033609	21116	21392	29744	36873	28318	36379	64670	45343	49581	7192	6212	11156	34040	30918	21376	9746	6078	8739	12762	14202	12036	7510	7066	4665	17989	18111	13339	5948	7692	7125	16133	12153	22860	6985	8501	13417	14084	13752	17771	8474	9204	6126	14050	15703	15933
ENSGALG00000041973	129	68	169	53	37	63	33	20	45	11	23	84	34	26	9	33	1	51	2	0	11	13	17	54	6	0	0	5	0	28	0	8	3	35	20	47	1	8	0	47	44	18	0	0	7
ENSGALG00000041909	51	47	93	88	92	139	87	174	101	296	419	368	71	60	26	441	398	491	50	100	59	519	452	501	102	57	67	513	227	307	59	39	187	425	218	458	65	99	136	513	296	335	97	68	92
ENSGALG00000052195	88	92	88	132	122	142	149	139	106	73	67	45	81	66	3	68	123	59	23	6	53	171	195	141	14	15	24	102	43	127	49	25	68	102	171	144	70	88	72	94	139	105	48	90	30
ENSGALG00000034701	0	0	7	9	11	15	8	14	0	5	0	0	11	0	0	0	31	11	0	0	7	44	25	0	4	0	0	37	0	0	0	0	16	27	19	36	4	5	8	25	23	26	5	7	9
ENSGALG00000047482	0	0	3	0	0	0	0	0	0	0	0	0	0	0	0	0	0	0	0	0	0	0	0	0	0	0	0	0	0	0	0	0	0	0	0	0	0	0	0	0	0	0	0	0	0
ENSGALG00000038757	68	60	77	61	53	65	73	33	44	28	20	34	26	27	14	41	15	40	24	10	28	73	34	54	16	16	12	36	35	31	14	29	43	27	12	39	27	20	24	57	40	30	38	34	15
ENSGALG00000029588	202	134	217	144	176	190	183	206	174	186	95	161	123	101	44	118	225	113	38	33	74	207	292	242	18	58	68	155	147	166	72	45	95	215	262	278	46	119	90	205	189	172	69	109	43
ENSGALG00000041938	0	0	0	0	0	0	0	3	0	0	0	0	0	0	0	0	0	0	0	0	0	0	0	0	0	0	0	0	0	0	0	0	0	2	0	5	0	0	0	0	0	0	0	0	0
ENSGALG00000021304	8	22	22	25	34	53	9	34	29	501	422	871	3	10	11	567	332	921	8	3	5	267	202	321	7	2	10	972	404	907	10	8	0	500	818	1338	2	20	25	706	1333	1561	11	14	15
ENSGALG00000003582	12	21	41	0	4	6	10	10	7	186	87	189	2	0	0	2	44	12	0	4	0	4	0	0	0	0	0	38	2	0	0	0	0	0	0	0	0	0	0	2	0	0	0	0	0
ENSGALG00000023552	8	6	7	8	3	0	0	0	0	164	26	16	0	0	0	0	7	0	0	0	0	0	0	0	0	0	0	0	0	0	2	0	0	0	6	0	0	0	0	0	0	0	0	0	0
ENSGALG00000013372	0	2	6	2	0	0	11	43	2	140	159	149	27	12	12	180	237	194	14	62	46	191	232	211	45	11	83	115	212	75	78	45	8	99	94	112	62	96	62	115	102	75	97	133	46
ENSGALG00000026625	4	7	6	2	3	9	4	8	5	24	25	19	6	0	1	4	10	8	4	23	10	9	9	17	4	1	16	1	6	1	2	1	1	6	2	5	0	1	1	4	2	1	3	3	0
ENSGALG00000003446	75	54	48	23	26	30	18	16	28	124	65	46	15	13	5	51	73	34	22	56	9	67	19	46	25	3	30	11	24	48	13	2	0	13	15	0	8	5	19	8	13	24	8	0	0
ENSGALG00000003547	1116	1494	1547	562	600	695	389	401	429	1250	1197	1397	109	430	286	1192	793	821	162	431	228	839	607	1129	275	35	289	862	863	900	199	307	74	634	846	959	183	319	134	1104	1302	1122	305	279	308
ENSGALG00000003558	109	156	185	59	93	98	47	47	62	139	44	63	5	47	14	177	111	71	28	9	12	154	156	162	30	0	41	122	83	107	48	39	6	68	131	142	26	46	34	65	113	161	31	40	19
ENSGALG00000013376	0	0	0	0	0	2	0	0	0	126	51	3	0	0	0	2	41	0	0	0	0	0	0	0	0	0	0	0	0	0	0	0	0	0	0	0	0	0	0	0	0	0	0	0	0
ENSGALG00000013377	108	159	95	70	74	104	38	36	38	245	56	109	7	113	51	162	77	81	19	18	18	126	124	130	40	2	30	128	152	115	36	23	11	94	173	112	18	67	63	147	104	78	32	34	20
ENSGALG00000039773	989	1280	1406	691	954	1121	210	639	414	417	601	535	476	151	155	503	585	541	157	102	172	499	512	661	178	62	113	457	218	284	177	138	231	245	281	326	148	188	134	373	300	278	198	250	150
ENSGALG00000039974	538	1610	690	468	944	1029	648	556	777	930	460	368	682	781	482	969	264	30	322	728	466	399	588	300	421	143	333	740	718	748	310	572	432	563	643	713	345	425	311	354	628	299	490	453	394
ENSGALG00000050416	328	375	465	272	349	410	326	323	246	200	155	246	224	98	90	395	480	347	78	16	151	772	933	815	98	107	140	597	362	523	131	148	289	447	550	484	102	116	138	489	506	392	108	127	64
ENSGALG00000052865	53	9	34	12	27	8	42	5	7	17	9	27	6	2	3	13	11	17	3	0	15	9	6	10	12	1	8	8	3	11	6	2	14	10	1	8	2	0	2	26	2	23	32	4	7
ENSGALG00000039408	204	212	317	128	145	214	164	120	184	126	120	187	72	43	27	227	170	277	44	45	53	214	264	232	79	25	39	142	139	135	64	56	63	81	161	247	17	76	27	220	162	136	56	65	31
ENSGALG00000046729	62	51	144	25	68	105	71	66	27	45	32	53	12	12	2	37	107	82	2	3	21	79	89	177	25	3	34	55	31	116	13	17	12	53	56	61	25	15	25	54	43	48	13	12	20
ENSGALG00000029971	0	0	89	6	0	2	0	0	0	33	20	0	0	0	0	8	2	4	0	0	0	0	43	0	0	0	0	0	20	2	5	0	0	0	2	0	0	0	0	0	0	0	0	0	0
ENSGALG00000034328	1178	1442	2106	1285	1204	1485	1889	1477	1532	1673	1675	2376	1058	998	567	2138	2138	2622	583	757	748	1886	1883	2120	1019	894	778	1784	1604	2033	953	752	1283	976	1059	1363	577	603	851	1763	1288	1358	817	918	807
ENSGALG00000039573	4485	4087	3108	3571	3780	4579	3529	2730	2679	2647	968	1908	1447	1989	1012	1602	1435	1301	713	334	658	1924	1903	927	970	1104	834	1446	1490	1657	1180	980	1525	1026	1314	1038	659	885	730	1207	1079	893	598	890	705
ENSGALG00000039156	17	7	35	13	18	15	13	10	7	42	12	37	5	0	0	64	90	78	26	6	15	96	144	168	26	53	25	54	75	33	22	14	58	49	87	52	12	51	30	69	86	33	26	76	20
ENSGALG00000020985	5	8	5	15	12	16	18	59	22	17	26	9	28	19	8	14	23	27	20	12	25	10	26	15	29	21	28	6	27	12	20	16	11	57	23	82	20	33	45	18	18	29	35	14	28
ENSGALG00000050793	0	0	2	0	0	0	0	0	0	4	0	0	0	0	0	0	4	16	0	0	0	6	14	9	0	0	10	13	35	0	0	7	0	3	17	8	0	5	3	2	0	4	0	11	2
ENSGALG00000051487	5	0	0	0	0	0	0	4	0	4	0	2	0	0	0	3	0	0	0	0	1	0	37	10	0	0	2	2	10	5	0	14	0	0	3	0	4	7	3	7	10	2	4	0	6
ENSGALG00000020986	0	4	0	0	0	0	0	0	4	13	14	22	0	0	0	37	23	52	2	0	6	42	39	20	8	0	0	29	130	10	16	8	0	65	32	38	22	20	28	79	107	29	33	44	6
ENSGALG00000047316	0	3	5	0	3	6	0	0	0	53	0	43	0	3	0	64	113	50	6	6	13	51	93	56	13	15	15	66	150	37	17	24	8	66	117	20	16	27	21	71	65	58	22	37	8
ENSGALG00000037223	0	0	0	0	0	0	3	0	0	15	0	4	0	0	0	18	19	16	9	0	0	35	17	31	3	0	24	8	45	11	0	6	0	8	32	7	15	10	21	12	38	27	9	29	7
ENSGALG00000052803	0	0	0	2	0	0	0	0	0	3	0	2	0	0	0	0	6	3	0	4	0	4	0	0	8	0	4	0	7	0	0	0	0	0	4	0	4	6	0	0	0	0	0	0	0
ENSGALG00000005544	0	0	0	0	0	0	0	0	0	0	2	0	0	0	0	3	2	3	0	0	0	19	4	0	0	0	0	0	4	0	0	4	2	0	0	0	0	0	0	0	2	0	7	6	4
ENSGALG00000005543	0	0	0	0	0	0	0	0	0	9	14	29	0	0	0	7	40	18	2	25	4	58	21	7	21	11	28	2	64	6	14	32	14	17	41	32	34	44	16	10	60	38	48	78	23
ENSGALG00000036111	849	1523	1087	427	482	702	173	250	267	245	155	289	92	157	60	160	104	134	55	58	50	195	185	280	131	29	224	142	218	109	118	119	48	67	111	73	53	91	86	72	116	89	72	111	93
ENSGALG00000051583	0	2	0	0	0	0	0	0	0	0	0	0	0	0	0	0	1	6	0	7	0	0	0	0	0	0	0	0	0	2	0	0	0	0	0	0	0	2	0	0	0	2	2	2	0
ENSGALG00000051085	121	286	223	99	188	155	15	42	78	42	28	78	35	20	37	73	55	82	22	113	31	86	54	61	46	8	93	25	60	15	79	81	17	48	48	43	54	35	65	78	27	40	131	68	59
ENSGALG00000016293	604	687	542	177	176	285	53	19	61	168	133	261	20	182	43	181	108	301	111	16	58	345	329	208	151	0	78	278	391	152	8	7	0	201	154	173	0	29	41	123	336	107	30	50	4
ENSGALG00000016294	18	23	20	26	12	20	0	0	0	17	12	10	0	2	0	3	14	13	3	11	0	13	9	38	11	0	9	7	27	16	9	8	4	5	12	8	7	4	2	30	4	17	0	3	4
ENSGALG00000016299	17	47	32	2	47	23	8	4	4	375	53	71	2	0	10	0	15	2	0	0	0	0	4	2	4	0	0	2	24	0	0	0	0	0	6	0	0	0	0	0	4	0	0	0	2
ENSGALG00000016300	16	6	17	69	83	49	284	138	138	0	0	17	47	295	106	0	28	0	233	100	168	2	11	4	193	64	288	0	0	9	86	83	29	0	0	0	32	19	13	0	0	0	90	18	0
ENSGALG00000016301	78	103	44	339	681	882	1274	1326	1212	75	0	23	751	1304	990	0	139	0	328	563	437	0	0	0	1026	137	571	0	0	0	282	249	129	0	0	0	492	648	446	0	4	0	522	693	628
ENSGALG00000046637	5	4	10	25	18	52	8	8	17	4	0	4	2	25	60	3	0	0	14	10	3	4	0	0	4	0	5	0	0	0	13	8	2	6	5	0	8	8	7	0	0	0	31	4	16
ENSGALG00000016309	3566	4363	2226	9841	9484	11271	12837	12427	10938	16	0	151	4474	39641	19691	0	546	24	12652	6017	7505	5	0	0	20568	2393	16997	6	4	0	5515	7979	1888	0	0	3	5874	7693	3644	0	0	0	4077	3347	3848
ENSGALG00000016313	258	298	45	502	478	1230	105	286	220	58	11	229	55	1080	104	346	184	194	78	69	84	264	307	291	131	29	93	224	40	251	146	430	69	292	377	469	76	117	115	345	35	448	162	124	126
ENSGALG00000054058	0	3	0	0	0	0	0	0	0	0	0	0	0	0	0	0	0	0	0	0	0	0	0	0	0	0	0	0	0	0	0	0	0	0	0	0	0	0	0	0	0	0	0	0	0
ENSGALG00000026814	0	0	0	0	0	0	0	0	0	0	0	2	0	0	0	0	0	0	0	0	0	0	0	0	0	0	0	0	0	0	0	0	0	6	0	0	0	0	2	0	0	0	0	0	0
ENSGALG00000015709	2797	2953	1673	696	883	1019	449	555	768	1489	850	1086	88	313	162	539	455	561	70	64	81	792	663	964	154	28	279	62	523	432	103	104	35	438	708	664	118	210	353	459	561	594	211	231	93
ENSGALG00000015705	362	315	308	68	81	125	26	85	82	164	40	102	15	68	48	43	24	39	18	2	20	26	57	36	29	0	20	7	30	3	14	19	3	17	15	38	2	10	7	0	11	14	22	26	1
ENSGALG00000015699	2223	2662	2424	1213	1609	1754	801	1103	1067	3197	1820	1771	304	802	801	1701	1075	1048	357	194	343	1319	1065	1671	657	107	502	872	875	814	418	396	86	642	728	704	225	351	266	711	588	747	283	304	198
ENSGALG00000020745	16	18	16	14	5	8	0	2	0	0	0	7	2	3	0	10	0	7	0	0	0	4	0	0	0	0	0	0	5	0	0	0	0	4	0	7	4	0	0	3	2	5	0	4	0
ENSGALG00000015706	368	311	161	188	147	233	106	74	112	336	105	249	28	328	122	404	164	78	99	106	70	281	191	186	114	22	109	192	263	235	120	133	43	110	197	139	101	150	41	195	195	190	111	133	109
ENSGALG00000015708	288	164	379	209	314	221	141	258	124	804	511	635	12	25	34	172	133	650	15	78	16	112	181	171	44	17	52	784	734	578	58	27	17	439	468	393	41	23	25	1484	1433	910	63	51	40
ENSGALG00000025605	7	8	4	4	2	1	0	2	0	3	0	2	0	3	2	2	2	2	0	0	1	0	2	0	2	0	0	0	0	0	0	0	0	0	0	0	0	0	0	0	0	0	0	0	4
ENSGALG00000050742	2185	2230	1457	659	814	991	388	481	695	995	282	669	100	931	526	394	294	345	104	134	137	334	401	345	264	48	235	193	236	181	130	142	33	262	224	265	68	216	68	182	200	256	190	218	235
ENSGALG00000026676	0	0	1	0	0	0	0	0	0	0	0	0	0	0	0	1	0	0	0	0	0	0	0	0	0	0	0	1	0	0	0	1	0	0	0	0	0	0	0	0	0	0	0	0	2
ENSGALG00000016531	1064	938	563	852	981	1113	842	772	545	1553	409	758	546	607	453	1100	1006	684	332	124	324	1119	1323	1112	421	249	554	790	1259	1019	436	328	167	505	868	544	269	492	327	524	465	608	170	448	219
ENSGALG00000052746	72	125	305	155	197	161	157	278	189	36	396	100	161	35	12	26	196	18	11	42	99	181	203	414	58	47	16	163	30	183	29	31	233	199	117	275	134	172	129	175	151	155	146	283	158
ENSGALG00000031281	80	136	174	103	110	108	139	101	111	53	68	96	98	79	46	112	62	48	60	24	55	95	106	113	59	89	51	76	62	70	78	75	197	73	64	99	87	105	94	71	52	45	51	116	72
ENSGALG00000042005	42	162	175	63	143	74	78	84	90	6	56	132	66	29	21	9	85	27	13	0	58	86	70	98	15	42	52	23	28	61	11	43	47	27	49	71	23	19	18	28	45	38	37	14	28
ENSGALG00000054823	0	0	0	0	0	0	0	0	0	4	3	0	0	0	0	0	0	0	0	0	0	0	0	0	4	0	0	0	0	0	0	0	2	0	0	0	0	0	0	0	0	0	0	0	2
ENSGALG00000041454	1068	1218	2708	2164	2194	2335	1734	1513	1483	557	1076	744	251	587	686	390	957	364	394	329	532	882	612	1287	440	80	221	439	270	656	500	224	230	604	591	1016	476	749	626	620	398	452	454	674	416
ENSGALG00000038191	53	69	26	21	0	25	0	0	9	22	0	0	0	0	2	13	5	1	9	0	8	30	11	19	0	2	14	17	19	13	16	0	0	0	11	0	0	0	0	0	0	17	0	0	0
ENSGALG00000031726	333	264	485	336	299	333	246	315	160	265	304	383	463	281	157	286	412	308	326	512	235	419	325	294	301	542	338	348	155	259	215	245	733	348	200	578	275	352	314	329	218	438	252	512	414
ENSGALG00000041028	548	818	787	46	66	72	0	0	0	0	0	2	4	0	0	0	0	0	0	0	0	0	0	0	0	0	0	0	0	0	0	0	3	0	0	0	0	0	0	0	0	0	0	0	0
ENSGALG00000015602	0	0	2	383	276	397	10070	3329	3631	0	0	72	9644	11452	8459	0	271	2	4368	4289	6446	0	0	0	6586	5146	5717	0	3	0	9736	8358	13024	0	0	0	16515	8049	9707	0	0	0	12428	9657	11621
ENSGALG00000015598	20	59	35	57	102	54	15	32	14	14	16	15	8	2	8	6	3	34	6	7	6	21	46	14	10	5	7	11	21	73	3	17	0	14	61	34	0	10	8	40	32	17	10	0	0
ENSGALG00000053579	0	0	0	0	0	0	0	0	0	0	0	0	0	0	0	0	0	0	0	0	0	0	0	0	0	0	0	0	2	0	0	0	0	0	0	0	0	0	0	0	0	0	0	0	0
ENSGALG00000054030	114	99	12	23	47	2	29	11	29	8	29	71	5	1	0	24	13	25	9	5	0	0	15	34	1	0	22	7	1	1	0	7	0	3	10	20	0	0	5	5	1	3	17	13	0
ENSGALG00000050450	0	0	0	0	0	0	0	0	0	0	0	0	0	0	0	0	0	0	0	0	3	0	0	0	0	0	0	0	0	0	0	0	0	0	3	0	0	0	0	0	0	0	0	0	0
ENSGALG00000015618	45	39	71	6	2	5	0	6	0	0	0	0	0	0	0	0	0	0	0	0	0	0	2	0	0	0	6	0	0	0	0	0	4	2	0	0	2	0	0	0	0	0	5	2	0
ENSGALG00000015617	8967	11676	16597	11012	11428	10239	2762	8017	6182	3984	13725	4774	7323	2070	4088	65	4277	8561	3856	5221	5285	10242	7757	8115	7702	2395	9158	8315	21	2582	1660	5181	4753	4904	4557	3105	1514	3455	2470	3766	6301	2558	1850	1936	1561
ENSGALG00000027714	228	277	479	366	314	298	354	368	253	304	244	268	152	115	72	537	283	261	74	136	102	367	308	331	173	22	171	526	329	322	51	84	20	320	246	278	77	97	108	375	507	630	71	114	89
ENSGALG00000023089	258	298	323	197	247	290	135	139	142	127	123	180	63	225	124	101	82	58	37	82	49	55	39	110	62	14	77	46	55	11	45	31	6	17	44	34	12	16	36	52	56	45	52	60	12
ENSGALG00000015603	308	409	589	289	273	345	300	302	222	363	331	529	321	213	169	490	321	579	157	295	162	78	421	349	217	240	150	330	433	591	309	346	219	387	240	508	287	225	159	468	385	298	367	444	419
ENSGALG00000053588	3	7	3	0	0	0	0	0	0	2	0	0	0	0	0	0	0	0	0	0	0	0	0	0	0	0	0	0	0	0	0	0	0	0	0	0	0	0	0	0	0	0	0	0	0
ENSGALG00000053586	5	0	0	0	2	3	0	0	0	3	9	5	0	3	0	4	2	0	0	0	0	8	0	0	0	0	0	0	0	0	0	0	0	0	2	0	0	0	0	0	0	0	0	0	0
ENSGALG00000053587	3	0	0	0	0	0	0	0	0	7	0	0	0	0	0	0	0	0	0	0	0	0	0	7	0	0	0	0	2	0	0	0	3	0	0	0	0	2	0	0	0	0	0	0	0
ENSGALG00000053580	0	0	2	0	0	0	0	2	0	0	0	0	0	0	0	2	2	3	1	2	3	2	0	0	2	3	2	0	0	0	0	0	0	0	0	0	0	0	2	0	0	0	0	0	0
ENSGALG00000053581	0	0	0	0	0	0	0	0	0	0	0	0	0	0	0	0	0	0	0	0	0	0	0	0	4	0	0	0	0	0	0	0	0	0	0	0	0	0	0	0	0	0	0	0	0
ENSGALG00000048737	94	43	53	43	56	85	5	16	15	67	20	40	6	21	18	13	10	7	22	13	6	10	14	5	21	6	7	15	14	5	4	10	8	34	6	18	17	6	22	15	0	4	6	5	10
ENSGALG00000012264	266	432	330	773	704	705	174	123	235	206	112	158	104	366	280	102	97	109	102	240	168	129	48	202	234	40	211	123	105	95	121	214	61	129	104	101	139	187	167	113	174	125	235	197	163
ENSGALG00000012245	1480	1935	2347	947	1060	1074	370	1015	684	1147	625	986	404	495	279	570	345	616	172	85	259	597	362	495	200	201	245	381	530	372	207	299	299	329	475	361	164	270	219	377	554	335	210	198	170
ENSGALG00000020160	44	19	341	2	7	13	0	0	3	171	20	56	0	2	0	29	38	4	3	4	0	19	177	13	3	0	0	0	182	3	0	0	1	0	1	0	0	0	0	0	5	0	0	0	0
ENSGALG00000054856	28	6	50	5	6	6	0	0	0	77	26	39	0	0	0	3	15	0	0	0	0	0	1	4	0	0	1	0	10	0	0	0	2	0	0	0	0	0	0	9	0	0	6	0	0
ENSGALG00000030614	183	107	715	37	82	79	0	4	18	468	267	227	16	8	7	41	106	8	26	0	4	32	76	12	19	2	12	62	973	38	29	30	4	4	26	0	2	38	15	26	17	25	16	52	18
ENSGALG00000047368	19	2	19	2	0	0	0	0	0	3	6	11	4	7	2	12	29	24	5	11	0	15	0	20	2	0	12	14	6	2	0	5	2	4	0	8	2	2	8	14	0	18	4	0	0
ENSGALG00000012227	167	137	79	68	77	74	26	18	21	18	13	17	7	8	13	9	6	15	9	0	7	22	10	20	8	0	23	17	12	22	8	11	9	4	7	4	13	26	30	6	4	6	35	15	16
ENSGALG00000042112	196	229	195	108	97	129	100	146	119	171	120	189	503	194	119	141	112	75	127	192	1596	114	111	101	142	73	108	96	138	122	84	173	533	54	96	98	156	119	145	132	129	96	139	196	1930
ENSGALG00000012239	1012	1178	1107	663	625	664	567	518	501	719	367	718	225	792	669	623	436	377	186	199	369	467	352	426	338	68	336	599	684	525	271	478	154	415	509	455	296	391	286	655	453	468	429	412	441
ENSGALG00000054581	19	10	11	6	0	6	0	0	4	0	0	0	4	0	0	2	0	0	0	0	0	7	12	0	0	0	0	0	4	0	0	2	11	0	3	3	6	0	0	0	0	0	7	0	3
ENSGALG00000054587	0	0	0	0	0	0	0	0	0	0	0	3	0	0	0	0	0	0	0	0	0	0	0	0	0	0	0	0	0	0	0	0	0	2	0	3	0	0	0	0	0	0	0	0	0
ENSGALG00000054584	0	0	0	3	3	6	0	0	0	0	0	1	0	0	2	0	0	0	0	0	0	0	0	0	2	0	0	0	0	0	2	0	0	0	0	0	0	0	0	0	0	0	0	2	0
ENSGALG00000016734	38	45	63	63	54	64	31	64	31	40	21	19	8	11	9	22	31	32	0	10	11	42	9	24	20	8	20	21	21	46	7	13	11	24	28	46	19	27	34	14	10	12	18	20	9
ENSGALG00000051163	0	18	6	5	3	8	10	0	9	5	5	3	12	0	0	0	0	0	10	0	18	4	6	10	0	0	0	0	0	0	4	2	13	0	0	5	6	4	6	4	0	2	3	7	13
ENSGALG00000031375	6	6	109	621	724	709	264	217	118	5	22	2	104	2	0	2	103	2	0	0	30	159	144	146	0	0	2	217	0	169	2	0	52	41	104	99	41	78	109	55	41	47	20	49	46
ENSGALG00000049965	761	960	1012	2426	2428	2860	1062	1791	835	913	842	1204	543	391	135	964	741	1006	276	410	206	1079	853	1196	446	313	381	1390	757	806	454	279	261	604	718	695	180	392	389	722	639	638	365	315	287
ENSGALG00000051166	0	0	0	0	0	0	0	0	0	0	0	0	0	0	0	0	0	0	0	0	0	0	0	0	0	0	0	0	0	0	0	0	0	6	0	0	0	0	0	0	0	0	0	0	0
ENSGALG00000016735	153	282	144	90	164	199	91	97	104	173	82	139	27	74	21	269	149	204	41	6	34	158	170	162	68	10	43	162	82	114	49	35	10	35	130	34	59	37	52	48	79	75	24	40	24
ENSGALG00000016737	1022	1120	1344	1016	1049	1208	601	760	643	987	1026	1307	485	533	295	1455	948	1232	309	375	503	1225	1058	1513	507	395	584	1585	1276	1362	322	504	166	1187	1069	1227	324	430	454	1740	1504	1170	466	494	364
ENSGALG00000051165	4	4	7	4	0	0	0	0	0	2	5	0	0	0	0	0	0	0	4	2	0	0	11	0	2	0	0	0	0	0	0	0	0	0	0	0	4	0	0	0	0	0	0	0	0
ENSGALG00000053053	2	0	0	0	0	0	0	0	0	0	0	0	0	0	0	0	0	0	0	0	0	0	0	0	0	0	0	0	0	0	0	0	0	0	0	0	0	0	0	0	0	0	0	0	0
ENSGALG00000053056	0	0	3	0	3	0	0	0	0	0	0	0	0	0	0	0	0	0	0	0	0	0	0	0	0	0	0	0	0	0	0	0	0	3	3	0	0	0	0	0	0	0	0	0	0
ENSGALG00000053059	13	2	0	0	0	0	0	0	0	0	0	0	0	0	0	0	0	0	0	0	0	0	0	0	0	0	0	0	0	0	2	0	0	0	0	0	0	0	0	0	0	0	0	0	0
ENSGALG00000005011	227	242	209	117	57	140	54	98	110	175	98	275	19	67	93	50	19	125	21	14	41	53	11	17	23	2	51	14	81	5	45	69	8	24	60	58	13	21	35	58	48	7	72	100	75
ENSGALG00000048077	52	55	49	39	23	54	41	31	36	30	9	19	4	26	25	3	10	5	10	7	14	29	19	7	2	2	15	14	8	7	4	13	4	0	15	22	13	20	12	33	15	6	16	26	9
ENSGALG00000025506	19	17	8	8	22	21	6	24	11	43	59	30	3	32	14	78	26	36	12	2	4	23	23	54	6	2	11	32	15	36	5	2	3	14	29	22	1	2	1	6	47	19	1	2	1
ENSGALG00000004885	496	430	549	192	193	276	93	117	122	281	164	165	20	102	72	182	102	106	50	27	28	126	108	227	82	14	61	80	125	101	54	69	7	67	97	123	37	40	49	109	105	85	31	36	46
ENSGALG00000032546	754	606	1105	386	397	471	172	286	316	658	362	490	75	113	153	284	233	264	63	69	66	305	290	419	118	30	110	303	222	241	80	99	42	189	201	246	50	137	122	242	209	186	120	108	83
ENSGALG00000026105	2	2	2	0	2	2	0	0	0	5	9	0	0	2	0	0	0	0	0	0	1	1	0	0	0	0	1	0	2	0	0	1	0	0	1	1	0	1	2	0	0	0	0	0	0
ENSGALG00000038032	3443	3005	3417	457	940	957	365	766	1097	799	116	893	146	590	314	284	229	473	187	250	359	649	544	664	310	99	427	348	399	347	167	306	99	264	393	403	144	273	276	576	557	389	189	314	261
ENSGALG00000004960	1757	3695	2118	2719	3596	4424	1053	1209	1093	10214	8837	11472	1315	866	633	4373	2504	3961	493	434	518	4599	1627	5843	1132	248	1586	1969	680	1830	1141	889	214	375	1373	657	168	344	258	642	501	418	601	476	133
ENSGALG00000052770	567	522	905	134	184	254	86	150	218	428	381	455	14	61	70	230	125	244	47	102	64	179	158	372	74	13	78	78	72	159	44	56	24	74	79	104	39	53	42	120	122	141	51	78	50
ENSGALG00000048828	86	84	82	8	20	16	7	13	10	46	5	50	0	14	8	28	7	4	0	0	4	28	5	16	15	0	12	12	0	5	0	8	0	5	0	0	0	0	7	7	7	5	3	3	4
ENSGALG00000054745	0	9	20	2	5	0	2	0	0	174	93	18	0	2	0	16	6	17	2	0	4	20	27	38	0	0	0	9	16	5	0	0	4	0	0	3	0	0	3	3	0	10	0	4	0
ENSGALG00000024171	35	19	62	40	26	42	31	18	26	731	143	53	5	20	5	57	61	71	18	16	20	94	65	58	37	10	21	33	126	54	18	109	100	32	24	22	8	6	57	4	5	16	28	20	9
ENSGALG00000003355	267	336	521	232	156	185	200	179	163	171	234	425	271	155	173	251	181	175	54	245	138	165	154	205	162	170	139	182	278	179	260	250	557	203	141	317	284	190	345	158	149	121	274	232	239
ENSGALG00000003348	0	138	1267	770	606	646	1121	1069	839	0	2302	147	1233	72	0	72	967	35	0	197	638	919	837	1123	0	63	16	1285	0	1247	0	0	1641	1176	739	1714	958	639	1431	1246	917	660	826	628	393
ENSGALG00000003370	21	1405	1300	556	584	884	345	582	396	10	940	1225	506	458	289	6	745	6	264	364	326	47	979	56	400	501	478	1060	16	1015	532	764	724	649	940	1049	324	413	430	1209	929	797	433	616	558
ENSGALG00000003360	23	26	29	14	24	24	10	27	18	63	109	44	7	9	3	24	73	12	7	4	19	37	20	45	14	6	13	41	55	16	3	10	13	36	24	24	0	20	9	20	16	10	21	11	3
ENSGALG00000024172	732	837	1270	646	468	629	402	437	426	403	394	520	231	154	118	431	298	315	90	141	104	354	195	229	113	144	105	240	316	244	192	184	285	228	249	301	79	99	69	233	239	168	163	117	67
ENSGALG00000003377	367	391	550	181	239	112	202	157	229	430	245	556	225	616	438	509	303	456	1068	441	1236	128	390	448	923	1026	1414	279	397	82	815	1359	1219	309	284	288	1453	996	1371	342	355	286	1024	997	1121
ENSGALG00000033332	6	7	17	8	2	6	4	5	2	108	69	24	0	2	3	14	11	23	0	0	0	22	8	34	0	2	5	0	17	11	2	20	24	10	9	9	9	3	12	9	7	0	2	12	6
ENSGALG00000027920	22	43	58	22	18	22	9	9	11	236	62	33	6	10	6	23	37	24	7	10	7	29	18	34	7	22	16	20	26	13	15	7	18	18	21	36	6	10	14	15	15	7	11	7	6
ENSGALG00000049374	5	4	0	2	1	3	0	0	2	8	0	4	2	0	2	8	2	1	0	0	0	5	0	8	2	0	2	5	0	12	1	0	2	1	2	5	0	2	0	0	0	2	0	0	0
ENSGALG00000053788	4	3	2	3	6	4	0	0	5	36	26	31	0	4	4	80	74	175	7	22	26	106	276	190	35	4	56	225	248	112	72	49	18	587	583	496	73	97	92	490	912	265	111	280	51
ENSGALG00000007186	29	65	92	34	34	50	14	33	13	337	372	624	38	9	7	534	192	751	3	42	20	197	317	405	31	32	34	640	557	779	27	27	26	656	564	452	0	77	22	1018	518	542	34	21	6
ENSGALG00000007174	27	67	52	39	53	51	4	16	11	347	108	202	11	13	9	44	87	42	11	5	6	44	52	49	6	0	17	72	58	13	11	57	5	70	120	48	19	0	0	71	128	34	16	24	8
ENSGALG00000035198	6	0	6	0	0	0	2	5	0	6	0	3	0	3	0	0	0	9	0	0	0	0	0	0	0	0	0	0	0	0	2	0	0	0	0	0	0	3	0	0	0	0	0	0	0
ENSGALG00000051635	8	6	17	8	9	7	2	5	4	5	8	7	0	5	2	3	3	8	0	0	0	3	6	0	2	0	1	0	13	5	0	0	0	5	8	11	0	0	2	21	16	12	2	2	0
ENSGALG00000039990	2794	635	346	232	252	387	200	21	88	1336	1238	1334	33	336	59	3217	1102	1296	320	82	46	8219	14463	4412	180	53	39	3299	5171	4850	385	2061	1145	7556	11245	14292	293	573	435	5221	5503	6031	1897	608	1793
ENSGALG00000007079	382	366	565	132	156	218	138	142	74	184	26	139	19	31	37	16	7	74	27	8	9	4	39	8	49	2	14	83	205	121	11	18	0	39	122	47	0	33	31	121	77	120	8	17	5
ENSGALG00000007038	142	53	39	37	35	45	11	5	0	38	0	15	3	0	0	0	0	18	0	0	0	0	5	0	0	7	2	22	11	80	0	0	3	3	0	11	0	0	0	8	20	5	0	0	3
ENSGALG00000034426	685	618	543	367	413	431	375	283	173	386	155	300	192	183	152	318	220	233	74	24	129	244	228	274	142	106	182	240	206	206	129	177	124	121	163	61	130	134	94	143	77	137	110	120	98
ENSGALG00000012857	3463	3915	2936	2182	2396	608	286	1357	879	160	420	144	888	599	336	580	1536	1090	335	440	415	3698	1571	2943	496	285	728	1009	939	300	492	381	316	1184	1015	297	207	261	466	167	993	977	357	59	257
ENSGALG00000028505	603	738	1408	1044	1043	1071	1074	1427	1033	511	992	698	2727	707	473	562	605	549	529	1911	1070	749	695	953	831	988	767	868	465	998	1045	791	2764	941	862	1165	1548	1433	1969	1250	1022	918	1476	1513	1769
ENSGALG00000051868	2	15	5	3	4	3	0	5	0	88	12	15	0	2	0	0	0	10	0	0	0	0	2	6	0	0	0	9	0	17	0	0	0	0	0	0	0	0	0	0	0	0	0	0	0
ENSGALG00000032595	112	158	552	427	397	412	532	295	423	218	523	464	375	171	121	302	243	350	182	343	395	356	336	574	221	252	228	280	243	467	211	221	673	476	222	853	485	396	622	561	383	329	344	332	331
ENSGALG00000012850	142	180	119	337	191	286	223	42	52	283	67	107	112	321	264	31	12	48	212	129	198	5	18	22	116	85	125	9	43	63	184	239	104	11	17	15	472	333	400	16	6	6	367	169	388
ENSGALG00000012852	2621	2598	3493	1931	2643	2792	1989	2197	1464	3505	2777	3613	1611	1929	1286	3432	2379	2675	862	907	1272	3067	2845	3828	1636	514	1352	2588	3213	3251	1118	1706	1560	2378	3084	3172	1839	1988	1395	3426	2925	2976	2794	2436	2953
ENSGALG00000000905	332	388	831	867	590	632	474	593	486	358	310	578	857	317	143	323	492	340	341	413	468	445	398	369	668	394	410	393	258	606	408	522	1010	484	411	731	689	715	1009	473	650	588	660	921	640
ENSGALG00000052544	15	12	10	10	20	18	16	8	3	5	0	3	2	17	51	14	4	6	3	2	3	8	7	0	0	0	4	0	0	1	6	9	0	4	4	4	6	0	0	2	4	0	2	3	0
ENSGALG00000032955	176	196	265	138	186	193	60	113	54	454	525	366	61	24	35	327	227	126	34	12	20	223	186	184	17	18	35	112	210	85	28	35	18	212	233	284	14	23	10	336	150	130	6	14	20
ENSGALG00000000920	117	104	234	31	74	102	35	45	21	639	543	30	34	12	6	21	19	19	10	8	5	34	35	9	7	3	5	9	33	3	3	2	3	15	4	11	0	0	2	5	5	8	7	7	5
ENSGALG00000012865	197	172	172	104	131	138	75	70	96	214	94	122	15	68	58	177	96	137	51	18	28	155	118	200	81	12	40	151	126	105	43	76	18	128	158	113	57	94	62	109	161	121	61	84	21
ENSGALG00000028879	1203	1506	2040	1255	1262	1598	1273	1256	1133	1389	1316	1830	1083	957	548	1474	931	1299	657	1168	777	1157	672	907	1227	1224	1209	1040	830	889	751	881	1038	807	558	860	940	1030	1548	1154	812	928	1151	1029	969
ENSGALG00000016664	0	0	0	0	0	2	0	0	0	0	0	0	0	0	0	0	0	0	0	0	0	0	0	0	0	0	0	0	0	0	0	0	0	0	0	0	0	0	0	0	0	0	0	0	0
ENSGALG00000055129	0	0	1	4	0	0	0	0	0	20	0	0	0	4	0	0	0	4	0	5	2	0	0	0	4	0	0	0	7	0	0	0	0	0	0	0	0	0	0	0	3	0	0	0	0
ENSGALG00000051908	3	0	0	0	2	0	0	0	0	0	0	0	0	2	4	0	6	2	0	0	0	2	0	2	0	0	0	0	2	0	0	0	0	0	2	0	0	0	0	0	0	0	0	0	0
ENSGALG00000016816	458	575	705	154	235	145	104	122	124	215	178	290	35	84	69	216	151	160	65	120	68	223	103	180	94	29	57	133	152	166	77	69	14	123	131	132	44	61	56	209	205	213	75	83	91
ENSGALG00000050442	20	53	119	9	10	18	7	22	11	54	27	68	3	7	20	9	22	32	9	10	5	10	23	5	11	3	0	15	23	29	5	18	8	6	5	43	0	10	15	5	0	6	24	0	0
ENSGALG00000016823	1648	1895	2064	537	671	536	209	279	419	648	564	561	68	297	215	323	195	199	115	164	99	300	214	337	128	36	169	185	222	147	130	236	45	316	176	192	131	176	152	323	205	145	368	244	195
ENSGALG00000035839	11	6	14	24	7	25	2	9	10	37	62	49	11	30	9	25	26	39	4	14	10	53	31	33	14	9	9	45	26	36	11	8	5	57	3	11	13	6	8	31	10	31	14	6	6
ENSGALG00000016820	235	245	345	179	264	262	243	423	288	2683	1905	2748	189	141	62	1096	1480	1447	95	216	147	1587	1701	1758	263	70	295	1204	1089	1100	477	469	192	905	1040	739	287	368	428	1030	793	731	560	264	319
ENSGALG00000016817	2936	3162	3210	3413	4103	3679	1831	2420	1465	1133	763	1508	323	1630	1150	1186	911	961	353	500	331	746	924	1435	840	74	733	725	1099	759	488	557	178	672	687	978	224	610	273	763	696	740	483	867	499
ENSGALG00000029145	597	644	748	530	578	796	683	554	577	399	353	367	282	728	841	432	212	228	605	1023	521	315	180	377	893	92	702	268	229	242	558	726	157	297	157	290	626	646	512	235	268	425	992	936	884
ENSGALG00000016824	434	387	381	119	216	281	163	110	110	336	218	296	61	89	90	398	263	263	78	69	48	276	231	291	123	10	112	200	242	177	60	54	18	175	163	133	75	54	55	263	194	260	51	109	36
ENSGALG00000040514	0	0	0	0	1	0	0	0	0	0	0	0	0	0	0	0	0	0	0	0	0	0	0	0	0	0	0	0	0	0	0	0	0	0	0	0	0	0	0	0	0	0	0	0	0
ENSGALG00000054872	0	0	0	0	0	0	0	0	0	0	0	0	0	0	0	0	0	3	0	0	0	0	0	0	0	2	0	0	0	0	2	0	0	0	0	0	0	0	0	0	0	0	0	0	0
ENSGALG00000054875	2	0	3	0	0	0	0	4	0	0	0	0	0	0	0	0	0	0	0	0	0	0	0	0	0	0	0	0	0	0	0	0	0	24	6	0	0	0	3	0	0	0	0	0	0
ENSGALG00000009944	1610	1926	2410	1021	1172	1158	780	1269	1011	1528	1272	1722	1156	894	565	1960	1100	1348	604	626	520	1863	1249	1927	771	573	743	1361	1165	1262	579	722	439	1049	963	1029	408	522	431	1510	1317	1476	568	784	556
ENSGALG00000009943	77	327	156	584	216	598	420	85	762	385	366	143	139	571	58	184	56	138	61	115	114	172	77	524	117	167	102	293	35	236	39	153	114	471	156	240	81	244	176	518	318	456	119	501	274
ENSGALG00000032702	63	101	173	88	125	80	68	28	51	268	94	161	23	47	22	56	79	58	17	14	16	148	43	32	10	15	11	20	15	29	36	13	37	38	30	153	6	17	70	32	39	16	19	8	3
ENSGALG00000040529	23	5	88	0	2	17	8	6	4	11	13	8	0	3	0	10	19	0	0	0	0	17	7	33	0	0	0	2	0	0	2	0	2	0	12	13	0	2	4	5	0	8	0	0	0
ENSGALG00000046427	3	6	8	4	11	2	2	0	0	0	0	0	0	0	0	0	0	1	0	0	2	2	2	0	0	0	0	0	0	0	0	0	0	0	0	3	0	0	0	0	0	0	0	0	0
ENSGALG00000045846	24	28	58	223	158	4	5	693	864	39	118	33	612	139	78	148	280	43	238	161	2	440	140	111	180	206	3	90	28	141	4	2	349	3	82	225	196	99	170	193	3	101	119	329	227
ENSGALG00000029917	354	367	828	1423	1549	1253	2872	2416	1837	7	17	76	1827	1621	789	2	122	10	619	741	585	16	13	7	846	657	586	0	8	22	354	156	779	0	12	10	187	184	277	21	14	23	152	179	169
ENSGALG00000029276	426	556	1114	679	930	936	551	579	530	458	673	473	328	274	237	705	966	762	123	126	254	1298	1232	1684	158	193	258	1039	428	1027	271	131	574	641	913	894	154	382	245	832	921	657	258	322	153
ENSGALG00000046825	0	0	0	0	0	0	0	0	0	0	0	0	0	0	0	6	0	8	0	0	0	0	0	0	0	0	0	0	0	0	0	0	0	0	2	0	0	0	0	0	0	0	0	0	0
ENSGALG00000046824	0	0	0	0	0	0	0	0	0	0	0	5	0	0	0	0	0	0	0	0	0	0	0	0	0	0	0	0	0	0	0	0	0	0	0	0	0	0	0	0	0	0	0	0	0
ENSGALG00000046822	3	4	3	0	4	3	0	0	3	0	0	0	0	3	0	3	0	0	0	0	0	4	0	0	4	0	0	0	4	0	2	0	0	11	0	0	0	0	0	0	0	0	10	0	0
ENSGALG00000054434	41	29	18	31	68	46	5	40	15	2	0	4	5	8	7	1	6	6	3	5	0	2	0	0	5	2	0	0	0	0	0	0	0	4	6	3	0	0	0	5	10	8	2	0	0
ENSGALG00000051344	0	0	0	0	0	0	0	0	0	0	0	0	0	0	0	0	0	0	0	0	0	0	0	0	4	0	0	0	0	0	0	0	0	0	0	0	0	0	0	0	0	0	0	0	0
ENSGALG00000051345	4	9	14	0	3	4	0	0	0	6	0	5	0	0	0	2	15	22	0	0	0	0	0	0	3	0	0	0	3	0	0	0	0	0	0	0	0	0	0	0	0	0	0	0	0
ENSGALG00000051342	17	10	13	0	8	8	7	9	3	0	0	2	0	0	1	2	0	0	0	0	0	0	10	0	5	0	4	9	4	0	6	7	0	0	3	0	0	0	0	0	0	0	0	11	0
ENSGALG00000051348	3	6	3	0	3	6	0	2	2	4	6	10	0	0	0	0	0	0	0	0	0	0	0	5	0	0	0	0	0	0	0	0	0	2	5	0	0	3	2	0	3	0	0	0	0
ENSGALG00000045639	0	0	0	0	0	0	0	0	0	0	0	6	0	0	0	11	10	8	5	2	0	16	19	17	11	2	18	11	25	0	0	6	0	11	12	11	11	13	7	9	8	13	3	9	0
ENSGALG00000032958	17	0	28	0	2	0	0	0	0	0	0	0	0	13	17	0	0	0	0	0	55	0	4	0	57	0	0	0	0	0	0	0	0	0	0	0	4	0	0	0	0	0	0	0	0
ENSGALG00000031635	142	181	241	92	102	110	57	142	103	198	248	243	43	120	63	292	195	250	53	156	70	169	90	280	134	8	90	192	141	188	43	69	14	205	144	165	40	66	49	381	273	238	165	75	58
ENSGALG00000043636	226	338	225	168	133	166	86	110	92	331	174	195	42	144	95	205	138	154	119	44	68	161	118	176	155	18	147	146	163	141	81	144	26	119	190	134	102	123	121	144	164	120	106	127	133
ENSGALG00000037112	94	133	135	55	47	55	28	48	29	149	125	151	3	45	38	137	82	70	22	47	37	79	64	131	57	2	45	67	98	70	28	31	8	159	81	90	35	56	28	138	121	102	61	77	72
ENSGALG00000031893	3481	5076	4668	1947	2582	2727	1090	1616	1484	4255	3899	4649	391	1002	840	3053	1812	2570	453	510	464	2298	2119	3771	759	82	886	2706	2902	2936	395	554	135	2411	2461	2271	242	431	448	3337	4077	2316	557	517	392
ENSGALG00000043243	942	972	675	426	589	683	359	364	306	668	555	800	166	377	292	959	741	658	200	669	371	1006	662	613	330	41	243	461	551	450	284	265	147	350	487	491	162	292	209	452	421	441	265	350	199
ENSGALG00000046769	1888	1768	2143	814	843	1066	509	522	494	1229	779	1092	206	649	410	1129	926	783	394	274	317	1048	888	1102	431	78	528	762	852	742	505	442	136	669	832	963	315	350	359	1017	1031	812	369	465	291
ENSGALG00000050651	108	85	122	30	39	52	20	16	27	120	48	145	10	34	24	202	110	117	22	29	21	122	111	180	37	6	59	223	66	75	42	27	4	126	100	88	9	19	13	524	292	416	23	28	27
ENSGALG00000031294	55	61	92	51	55	58	20	35	25	24	43	34	2	19	11	37	48	18	9	7	18	56	27	23	13	0	23	24	24	44	13	18	2	19	44	30	10	8	22	55	36	45	20	16	3
ENSGALG00000040060	91	42	67	84	85	66	45	48	164	251	83	159	108	186	160	219	114	53	135	141	97	37	45	90	78	115	53	149	57	86	81	101	60	66	76	38	75	113	31	51	59	79	46	96	51
ENSGALG00000054860	0	0	1	0	0	0	0	0	0	0	0	0	0	0	0	0	0	0	0	0	0	0	0	0	0	0	0	0	0	0	0	0	0	3	0	0	0	0	0	0	0	0	0	0	0
ENSGALG00000038520	34	29	63	84	116	81	354	226	383	7	11	17	233	330	589	4	6	8	23	8	12	4	5	0	89	14	20	3	4	5	33	21	5	0	0	0	5	7	3	0	4	3	15	14	13
ENSGALG00000047596	14	10	16	11	9	7	0	5	10	48	34	25	6	0	7	15	9	13	0	8	5	8	0	12	7	6	2	11	13	23	8	8	7	9	14	19	5	0	4	19	13	16	6	4	4
ENSGALG00000036114	3470	3996	5738	5369	4755	4876	3808	5063	3583	2803	2899	3795	3575	2543	1701	2871	2245	2177	2040	2973	2701	2800	2726	3222	2297	5433	2516	2001	1792	2444	3239	3985	6358	1501	1527	1912	3870	3519	4422	2612	2040	1519	2783	4646	3103
ENSGALG00000032868	749	884	18	718	11	905	1019	6	772	741	555	18	978	9	438	604	496	650	759	894	888	689	561	669	1113	666	792	579	636	639	863	1146	1328	538	509	532	1569	1117	1324	816	559	777	900	1121	1274
ENSGALG00000039982	87	90	112	47	84	101	32	63	44	256	297	342	67	21	18	272	551	334	11	17	57	233	212	332	46	23	72	110	204	61	42	57	68	150	225	234	19	213	60	157	116	135	74	177	37
ENSGALG00000039420	277	139	579	232	423	439	300	156	185	63	40	81	301	180	27	113	89	44	128	0	58	48	155	115	59	250	78	179	74	116	245	202	383	37	113	66	252	348	243	19	21	68	117	220	204
ENSGALG00000040549	59	48	51	89	92	88	47	53	76	226	251	330	35	13	13	587	510	518	21	5	23	694	639	1147	22	11	90	348	398	550	14	16	57	329	446	769	14	83	93	346	382	449	18	44	22
ENSGALG00000031975	2898	3360	3074	3688	3334	4311	2945	3565	2284	5070	6723	5852	2276	6657	2880	6592	5077	5561	1542	2727	1865	7035	5024	7609	2221	402	2494	5060	3506	4310	1745	3553	993	6257	5353	5929	2854	3282	2204	7396	5420	5553	3396	3668	4050
ENSGALG00000008003	301	331	450	278	241	291	219	214	224	169	89	223	219	80	66	164	138	132	87	133	99	212	169	131	101	133	104	176	155	178	138	115	286	102	110	149	138	127	122	180	123	127	212	220	141
ENSGALG00000051962	29	26	16	0	9	6	6	10	9	4	0	2	0	0	0	3	2	12	0	0	0	0	0	0	0	0	0	0	4	0	0	2	0	0	0	0	0	0	0	0	0	2	0	7	0
ENSGALG00000051963	8	13	10	5	7	1	0	0	0	0	0	2	1	4	0	0	0	0	0	0	0	0	7	0	0	5	2	0	0	0	2	3	0	0	0	0	0	0	0	0	5	0	0	6	0
ENSGALG00000051961	0	2	0	0	0	0	0	0	0	0	0	0	0	0	0	0	0	0	0	0	0	0	0	0	0	0	0	0	0	0	0	0	0	0	0	0	0	0	0	0	0	0	0	0	0
ENSGALG00000051965	0	0	0	14	6	0	0	0	0	0	0	0	0	0	0	0	0	0	0	0	0	0	0	0	0	0	0	0	0	0	0	0	0	0	0	0	0	0	0	0	0	0	0	0	0
ENSGALG00000051969	0	0	0	0	3	3	3	0	0	0	0	0	0	3	0	0	5	0	0	2	0	0	0	0	9	0	5	0	0	5	0	3	5	3	0	0	0	5	0	0	0	0	0	0	0
ENSGALG00000031812	11	7	4	0	2	3	5	0	0	0	0	7	0	0	0	2	0	9	4	0	4	0	0	0	0	4	0	0	0	0	3	0	27	0	0	0	0	3	0	0	0	0	0	4	2
ENSGALG00000055041	0	0	0	0	0	0	0	0	0	0	0	0	0	0	0	0	0	3	0	0	0	0	0	0	0	0	0	0	0	0	0	0	0	0	0	0	0	0	0	0	0	0	0	0	0
ENSGALG00000055040	3	0	2	0	0	0	0	0	0	4	2	6	0	0	3	0	2	0	0	0	0	2	7	8	2	0	14	0	0	0	0	0	0	0	3	0	2	3	2	5	0	0	0	0	2
ENSGALG00000055042	3	4	7	0	0	4	0	0	0	0	4	4	0	0	4	0	0	0	0	0	0	0	0	0	0	0	0	0	0	13	0	0	0	0	0	0	0	0	0	0	0	2	0	0	0
ENSGALG00000055046	0	0	6	0	0	0	0	0	0	0	0	5	0	0	0	7	1	0	0	1	0	5	11	4	4	0	4	0	4	0	0	2	0	0	0	0	0	3	0	0	0	3	0	0	0
ENSGALG00000049076	15	9	33	3	12	2	0	4	5	59	126	150	2	5	12	78	76	89	7	20	8	49	26	47	22	0	8	30	22	20	20	14	3	11	11	6	6	2	0	20	25	32	30	10	8
ENSGALG00000011442	754	1207	469	1317	3263	260	1273	1466	869	1524	432	1391	720	748	402	1570	66	1379	531	83	272	1704	1145	1454	175	375	1248	1067	1073	1512	420	604	221	407	758	437	293	432	424	609	478	508	318	324	200
ENSGALG00000036148	43	56	66	27	35	28	23	26	13	70	81	52	11	40	21	49	57	43	35	40	14	74	57	60	36	0	35	32	70	68	14	44	15	44	60	53	50	44	17	92	93	55	31	47	37
ENSGALG00000011428	394	424	442	219	267	344	210	220	179	629	540	536	91	230	130	655	488	440	135	108	134	574	647	805	203	31	218	629	479	760	117	332	87	653	752	880	256	363	299	896	989	914	371	482	413
ENSGALG00000011439	96	35	117	56	76	79	45	10	35	75	380	190	15	4	4	151	93	187	7	19	15	100	80	75	18	0	0	164	104	147	14	7	10	66	44	50	0	22	15	52	51	61	38	33	32
ENSGALG00000053702	17	6	39	0	10	12	0	0	6	28	57	53	2	0	6	26	28	29	2	4	18	40	44	40	7	0	8	9	6	18	15	4	6	7	6	14	0	0	11	0	6	3	7	4	6
ENSGALG00000011314	138	244	161	49	133	141	282	745	183	69	57	109	51	29	20	28	44	25	15	4	4	38	12	16	12	2	13	13	17	4	8	0	4	6	4	5	0	2	0	0	10	7	6	4	2
ENSGALG00000011405	272	264	251	232	428	375	624	522	369	84	34	81	12	160	134	80	75	55	29	10	13	68	32	26	88	0	57	15	62	3	46	31	7	10	60	46	17	34	35	0	8	27	22	4	23
ENSGALG00000027247	0	0	0	0	0	0	0	0	0	20	19	18	3	3	0	206	194	487	26	4	75	211	351	680	63	70	67	127	293	101	13	45	39	100	215	127	8	36	78	81	133	118	20	32	32
ENSGALG00000025811	442	571	827	357	427	371	281	349	319	625	545	622	131	455	326	475	418	445	252	633	321	321	300	501	705	38	530	287	367	314	254	453	110	295	273	344	758	734	795	489	447	335	886	765	593
ENSGALG00000047885	0	0	0	0	0	0	0	0	0	2	1	1	0	0	0	0	0	0	0	0	0	0	0	0	0	0	0	0	0	0	0	0	0	1	1	0	0	0	0	0	0	0	0	0	0
ENSGALG00000047882	0	6	2	0	0	4	0	3	0	0	9	0	0	2	0	0	0	0	0	0	0	0	3	0	7	0	0	4	0	0	0	0	0	0	0	0	0	0	0	0	0	0	0	0	0
ENSGALG00000047883	0	0	0	0	4	0	0	0	0	0	0	0	0	0	0	0	0	0	0	0	0	0	0	0	0	0	0	0	0	0	0	0	0	0	0	0	0	0	0	0	0	0	0	0	0
ENSGALG00000047881	0	0	0	0	0	0	0	2	0	0	0	0	0	0	0	0	0	0	0	0	0	0	0	6	0	0	0	0	0	0	0	0	0	1	2	0	0	0	0	0	0	0	0	0	0
ENSGALG00000047888	1	0	0	0	0	2	0	0	0	1	1	0	0	0	0	0	0	0	0	0	0	0	0	0	0	0	1	0	0	0	0	0	0	0	0	0	0	1	0	0	0	0	1	0	1
ENSGALG00000032413	1432	1564	1860	539	746	712	460	687	712	4818	2718	54	172	496	459	191	959	3432	353	532	380	50	3870	5552	611	47	583	4720	9	59	615	653	109	3097	114	4993	342	841	655	1017	4951	4683	690	689	515
ENSGALG00000001334	8787	12290	12642	5833	6031	6769	2601	3062	3790	11620	9612	13235	1375	2860	1887	13473	2856	10004	1029	1678	1557	12765	11572	14815	2061	473	515	11526	1549	10633	2081	3235	753	11246	11481	12726	1874	3132	2430	14064	13152	12235	3377	3230	2467
ENSGALG00000001374	2637	3296	2870	828	1554	1389	413	396	500	1262	760	1258	244	431	271	1162	757	825	213	108	225	1088	1087	1166	282	120	282	936	1027	945	181	289	61	637	956	748	172	276	222	814	1235	1097	344	293	255
ENSGALG00000021676	1477	1882	2366	1013	1116	1165	753	578	845	2788	1615	3101	506	908	665	2621	2251	2491	919	860	1450	2178	1856	2516	1298	941	1154	1913	2170	2203	785	1255	995	1646	1888	2120	887	1230	992	2130	2861	2764	876	1610	1318
ENSGALG00000001392	1524	1464	1886	887	2285	1770	157	285	246	2124	1340	2420	164	277	253	984	881	1647	182	536	324	1526	668	1672	261	58	592	1069	737	697	600	217	31	425	622	372	90	212	130	749	509	418	335	206	38
ENSGALG00000001382	537	583	966	209	337	411	141	110	149	633	420	642	51	175	167	633	416	423	95	215	125	937	511	677	138	23	204	471	456	357	166	126	52	525	472	662	128	124	152	462	675	598	264	175	212
ENSGALG00000001483	894	1146	1009	510	477	644	226	226	169	382	218	445	173	79	35	321	291	382	93	158	79	587	678	731	134	85	287	541	405	272	196	107	124	215	209	178	81	73	69	415	466	468	127	79	103
ENSGALG00000001473	614	706	669	413	526	435	480	481	447	1150	505	685	217	512	325	883	511	900	251	213	263	902	678	925	346	104	300	1322	1237	1307	234	539	175	819	1026	831	310	405	382	1145	1202	1070	357	387	384
ENSGALG00000001489	396	483	666	309	336	457	377	409	366	534	539	618	259	259	202	679	642	332	235	472	283	612	386	600	392	47	335	542	501	393	251	324	132	530	676	964	431	371	455	891	876	826	683	674	750
ENSGALG00000037713	3	4	54	42	39	29	7	6	14	0	7	0	2	0	0	0	24	0	0	0	6	34	36	18	0	0	0	28	0	25	0	0	5	58	42	60	6	2	2	52	40	44	5	0	12
ENSGALG00000035228	14	16	34	19	15	69	0	9	0	108	13	11	13	0	3	30	25	17	12	17	4	14	31	0	8	0	0	0	14	32	5	5	0	12	10	10	0	0	0	0	0	7	0	0	0
ENSGALG00000035221	0	0	0	0	0	0	0	0	0	0	0	0	0	3	0	0	0	0	0	0	0	0	0	0	0	0	0	0	0	0	0	0	0	0	12	0	0	0	0	0	4	0	0	0	0
ENSGALG00000036040	11	13	29	6	0	4	0	0	6	14	0	5	4	0	0	8	3	3	0	4	0	5	13	0	2	0	0	0	0	9	4	4	0	6	0	19	0	0	3	12	3	3	3	0	5
ENSGALG00000034574	0	0	0	0	0	0	0	0	0	2	0	0	0	0	0	0	0	0	0	0	0	0	0	0	0	0	0	0	0	0	0	0	0	0	0	0	0	0	0	0	0	0	0	0	0
ENSGALG00000000684	584	602	916	756	509	890	178	278	219	17	9	5	40	19	58	7	8	21	14	13	9	3	19	37	18	15	16	0	8	0	14	21	10	9	11	26	7	11	6	0	3	5	34	16	0
ENSGALG00000044191	115	181	153	70	101	106	31	79	70	2	6	5	23	16	31	0	0	7	3	11	7	0	0	7	5	8	2	0	0	0	5	0	0	0	3	0	4	0	0	0	0	3	0	0	0
ENSGALG00000000611	1711	1828	1852	1090	1835	1953	1144	1687	1300	2544	1273	2087	789	1515	1150	2033	1168	1269	1024	783	664	1618	1922	1906	847	834	1209	1616	2160	1801	2460	3124	1295	1415	1596	1845	1051	1287	1081	1406	1776	1469	1354	1526	2164
ENSGALG00000037043	1032	944	980	1283	1391	1813	628	583	635	195	59	224	203	445	568	137	144	113	126	77	127	245	246	231	396	152	226	139	92	101	451	220	444	51	115	79	154	199	237	89	76	77	118	187	174
ENSGALG00000000636	1681	1272	800	488	606	810	194	455	333	557	272	697	111	453	320	620	390	553	25	99	21	508	532	669	64	197	29	25	489	29	12	223	120	190	525	119	275	639	280	202	264	15	294	457	8
ENSGALG00000031776	646	931	1290	210	231	81	288	389	310	1579	10712	2190	340	220	298	14128	9003	3699	212	398	353	21635	20435	707	235	74	449	27109	24436	29725	246	221	97	24456	2530	31806	38	119	197	40277	33611	37390	141	198	89
ENSGALG00000000668	2165	2270	2607	1168	1357	1334	1328	996	1160	1813	1360	1986	941	1357	983	2190	1141	1811	473	705	632	1905	1560	2218	871	606	856	1898	1457	1776	610	963	700	1153	1252	1359	654	796	567	1604	1590	1519	834	808	636
ENSGALG00000041123	324	345	282	251	347	397	274	210	178	415	130	242	97	218	144	427	230	257	122	33	94	325	412	331	175	61	158	327	374	394	107	146	56	225	395	135	96	169	82	326	221	221	57	125	117
ENSGALG00000034281	113	562	433	1954	1303	244	529	807	382	2272	1825	3034	979	1460	1831	11798	4789	5366	816	594	1033	13864	9152	6585	1408	913	1130	11594	7995	12493	1409	1803	668	12499	19177	14960	1238	2321	678	15630	7528	11570	1179	1603	1421
ENSGALG00000036616	3	9	17	4	9	5	0	3	2	70	25	78	0	2	0	135	36	128	0	0	0	70	149	89	7	0	0	103	247	172	2	2	3	244	128	49	5	0	0	531	167	154	0	0	0
ENSGALG00000036598	0	13	0	0	0	0	0	0	0	0	0	0	0	0	0	0	0	0	0	0	0	0	0	0	0	0	0	0	0	0	0	0	0	0	0	0	0	0	0	0	0	0	0	0	0
ENSGALG00000048301	1	0	2	0	0	2	0	5	0	0	0	0	0	0	0	0	0	0	1	2	0	0	0	0	0	0	0	0	0	0	0	0	0	1	0	0	0	0	6	0	0	0	0	0	0
ENSGALG00000048304	0	0	0	0	0	0	0	0	0	4	0	0	0	0	0	0	0	0	0	0	0	0	0	0	0	0	0	0	0	0	0	0	0	0	0	0	0	0	0	0	0	0	0	0	0
ENSGALG00000052085	7	6	5	0	3	0	0	0	0	9	0	7	0	0	0	0	2	0	0	0	0	0	0	0	0	0	0	0	0	0	0	0	0	0	0	0	0	0	0	0	0	0	0	0	0
ENSGALG00000034684	16	2	11	0	2	0	0	0	2	9	9	9	0	0	0	0	0	0	0	0	0	0	0	5	0	0	0	0	0	0	2	0	0	3	0	0	0	2	0	0	0	0	0	0	0
ENSGALG00000052080	5	0	0	0	0	0	0	0	0	0	0	0	0	0	0	2	0	0	0	0	0	0	0	0	0	0	0	0	0	0	0	0	0	0	0	2	0	0	2	0	0	0	0	0	0
ENSGALG00000052082	0	2	0	0	0	0	0	0	0	0	0	0	0	0	0	0	0	0	0	0	0	0	0	0	0	0	0	0	0	0	0	0	0	0	0	0	0	0	0	0	0	0	0	0	0
ENSGALG00000047307	0	0	0	0	0	0	0	0	0	0	0	0	0	0	0	0	0	0	0	0	0	0	0	0	6	0	0	0	0	0	0	0	0	0	0	0	0	0	0	0	0	0	0	0	0
ENSGALG00000047306	2	0	0	0	0	0	0	0	0	6	0	0	0	0	0	0	0	0	0	0	0	0	0	0	0	0	0	0	0	0	0	0	0	0	0	0	0	0	0	0	0	0	0	0	0
ENSGALG00000011270	12824	18594	10709	650	1500	1319	77	122	298	23	24	123	13	202	205	0	15	6	13	4	22	0	4	28	57	0	40	11	0	0	3	11	0	0	6	0	0	8	0	0	0	0	0	0	0
ENSGALG00000011269	96	68	62	4	0	14	0	2	5	12	21	36	4	5	5	12	10	15	3	0	3	0	5	12	4	0	5	11	6	0	7	3	0	0	0	0	0	0	0	0	0	0	0	0	0
ENSGALG00000030550	1929	1737	2226	465	827	841	1057	892	1141	1223	623	666	145	927	492	705	600	496	181	333	173	513	348	701	417	47	311	396	400	292	295	514	79	383	517	415	184	256	170	403	466	434	291	348	288
ENSGALG00000035493	593	605	769	153	162	166	52	114	120	375	164	316	16	100	99	242	169	116	53	18	48	113	92	161	78	9	83	124	94	114	56	45	22	52	96	140	38	66	54	105	150	79	68	93	48
ENSGALG00000011207	1127	974	1373	1761	974	1377	1665	917	865	1384	780	1241	456	409	271	1320	698	1236	188	387	450	1480	1476	2228	421	222	577	443	1391	1262	299	735	530	868	824	1771	232	220	435	920	534	814	407	323	186
ENSGALG00000011206	23	24	25	34	30	52	16	16	23	114	14	61	5	13	9	55	48	44	13	11	8	83	73	103	30	0	34	25	50	55	23	10	5	14	43	22	24	26	27	19	28	24	10	11	12
ENSGALG00000033106	405	1739	181	868	723	1065	584	638	577	1345	1592	1577	103	546	410	2155	1324	145	224	545	280	293	1258	1990	457	32	412	163	216	1182	357	288	100	1052	1109	1246	160	230	179	187	1080	1137	256	201	154
ENSGALG00000051263	27	86	84	22	43	26	0	16	0	36	118	79	0	7	7	49	27	38	0	25	0	23	12	49	17	0	15	0	30	10	0	9	0	31	6	7	0	7	6	18	38	4	0	0	11
ENSGALG00000049176	323	314	379	113	143	156	76	60	84	296	357	359	22	116	77	218	163	137	54	99	59	191	154	391	93	12	77	150	137	167	66	70	14	105	162	165	47	105	34	141	143	180	74	71	60
ENSGALG00000011168	191	222	207	66	80	169	45	51	54	146	104	113	12	57	60	175	65	127	49	39	56	70	54	179	44	14	84	93	59	136	69	43	31	104	135	145	81	76	83	122	81	195	57	28	58
ENSGALG00000052559	0	0	0	0	0	0	0	0	0	0	0	0	0	0	0	0	0	0	0	0	0	0	0	0	5	0	0	0	0	0	0	0	0	0	0	0	0	0	0	0	0	0	0	3	0
ENSGALG00000052555	0	0	0	0	0	2	0	0	0	0	0	0	0	0	0	0	0	0	0	0	0	0	0	0	0	0	0	0	0	0	0	0	0	6	0	0	0	0	0	0	0	0	0	0	0
ENSGALG00000052551	0	0	0	0	0	2	0	0	0	0	0	0	0	0	0	0	0	0	0	0	0	0	0	0	0	0	0	0	0	0	0	0	0	0	0	0	0	0	0	0	0	0	0	0	0
ENSGALG00000005978	2	4	0	5	3	0	3	0	0	0	0	0	0	0	0	0	0	0	0	0	0	0	0	0	0	0	0	0	0	3	0	2	0	0	0	0	0	0	0	3	0	0	0	0	0
ENSGALG00000048875	3	0	2	3	0	4	0	3	0	6	7	0	2	0	0	23	2	6	0	0	0	24	18	14	0	0	0	3	2	8	4	0	0	0	10	0	0	0	0	0	4	0	0	0	0
ENSGALG00000048870	0	0	0	0	0	0	0	0	0	0	0	0	0	0	0	0	0	0	0	0	0	3	0	0	0	0	0	0	0	0	0	0	0	0	0	0	0	0	0	0	0	0	0	0	0
ENSGALG00000048871	0	3	0	0	0	0	0	0	0	0	0	0	0	7	0	0	0	0	0	0	0	0	0	0	0	0	0	0	0	0	0	0	0	0	0	0	0	0	0	0	0	0	0	0	0
ENSGALG00000042584	7	19	21	14	6	8	2	0	0	0	0	0	0	0	5	0	0	2	0	4	2	0	0	0	0	0	2	0	0	0	0	0	0	0	0	0	0	0	0	0	0	0	0	0	0
ENSGALG00000036861	2	3	0	0	0	0	0	0	0	2	0	0	0	0	0	0	0	0	0	0	0	0	0	0	0	0	0	0	0	0	0	0	0	0	0	0	0	0	0	0	0	0	0	0	0
ENSGALG00000036869	4	9	17	4	12	17	6	4	6	0	0	0	0	0	6	0	0	0	0	0	0	0	0	0	0	0	0	0	0	0	2	0	0	0	0	4	0	0	0	0	0	0	0	0	0
ENSGALG00000011347	2	2	18	8	2	8	11	14	5	3	0	3	7	0	0	5	20	0	4	0	2	8	24	8	4	5	4	0	2	6	8	0	3	2	0	0	0	2	8	0	0	0	5	0	8
ENSGALG00000052271	41	18	93	20	46	41	60	60	52	70	111	91	95	47	49	65	63	59	77	90	65	40	32	104	70	60	47	18	35	57	109	34	132	34	21	40	61	87	124	51	11	63	62	103	142
ENSGALG00000034212	0	0	0	0	0	0	0	0	0	322	38	17	0	0	0	0	0	0	0	0	0	2	0	0	0	0	0	0	5	36	0	0	0	10	0	8	0	0	0	24	20	39	0	0	0
ENSGALG00000011349	0	0	0	0	0	0	0	0	0	0	8	0	0	0	0	0	0	0	0	0	0	0	11	0	0	0	0	0	0	0	0	0	0	0	0	0	0	0	0	2	0	3	0	0	0
ENSGALG00000011358	17	2	116	16	12	17	0	5	5	8	0	2	0	2	0	2	0	0	0	0	2	0	5	2	0	2	0	0	6	0	0	8	0	2	0	5	8	0	4	0	0	0	0	2	0
ENSGALG00000011355	2	0	30	4	2	9	0	0	0	4	0	0	0	0	0	0	0	0	0	0	0	0	4	0	0	0	0	2	0	0	0	0	0	0	0	0	0	0	0	0	3	0	0	0	0
ENSGALG00000011360	50	22	58	158	190	273	248	147	166	22	14	13	872	2339	1673	0	6	10	1034	1117	1333	7	0	0	1286	1107	608	0	2	0	1440	957	1683	10	5	9	1259	1309	1187	0	0	16	1052	1176	706
ENSGALG00000002470	41	47	162	269	227	295	281	520	158	97	25	35	335	280	106	28	83	28	76	51	108	48	322	53	263	205	20	39	183	44	86	54	69	12	13	23	28	25	45	47	30	16	31	69	41
ENSGALG00000027991	189	209	171	121	142	152	190	156	85	227	51	160	534	642	227	101	93	89	195	55	206	85	91	110	206	318	109	52	143	115	163	145	239	38	55	64	254	259	202	79	31	91	86	191	70
ENSGALG00000041015	0	0	0	0	0	0	0	0	0	0	0	0	0	0	0	0	0	0	0	0	0	5	0	13	0	0	0	0	0	0	0	0	0	0	4	0	0	4	0	0	0	0	0	5	0
ENSGALG00000041014	0	8	5	0	14	28	17	12	0	10	10	14	0	7	0	18	12	13	0	0	3	15	20	0	0	0	0	4	13	19	0	0	0	0	20	22	0	0	2	16	14	20	0	6	0
ENSGALG00000036196	147	182	257	99	118	120	109	79	106	112	122	113	73	67	54	114	74	127	13	74	6	82	104	121	37	33	0	84	124	103	58	9	61	101	73	128	41	29	32	80	136	120	37	39	39
ENSGALG00000014877	191	218	127	86	93	93	45	28	44	2520	736	1481	10	66	27	120	285	129	88	109	42	83	147	101	107	34	222	258	217	90	273	367	46	56	133	92	191	357	250	166	43	96	340	279	161
ENSGALG00000014874	303	444	517	540	401	558	561	537	484	274	285	249	274	215	86	314	326	255	115	69	157	427	286	365	165	27	144	309	139	235	64	117	61	187	313	367	220	190	214	291	321	243	206	198	227
ENSGALG00000014872	290	435	446	51	188	95	24	82	37	234	196	295	55	23	20	251	164	236	57	19	45	238	139	232	40	0	67	167	247	96	34	28	0	94	93	46	14	24	15	137	154	115	56	51	32
ENSGALG00000014869	961	714	284	1336	909	1112	2857	1772	1400	324	22	191	254	1848	580	133	150	109	198	26	211	139	166	132	414	24	353	197	153	183	203	188	35	106	214	80	319	483	168	94	163	115	141	295	288
ENSGALG00000014867	236	254	217	274	156	390	166	184	178	368	265	271	30	497	84	225	264	105	36	87	92	222	216	284	136	24	98	256	134	161	37	60	25	152	114	102	184	182	116	174	180	145	154	78	194
ENSGALG00000014865	56	52	70	103	94	121	39	54	30	50	45	64	43	12	13	29	57	39	14	8	12	43	36	35	38	2	17	20	16	25	6	6	0	6	14	22	21	20	19	15	16	0	17	17	14
ENSGALG00000014863	291	339	420	263	265	281	170	183	152	270	183	281	94	168	132	185	128	145	89	59	97	153	146	227	139	72	121	141	177	212	90	115	67	117	109	156	70	88	102	144	151	99	137	118	97
ENSGALG00000014891	744	890	1021	776	806	811	692	463	523	1424	759	560	711	737	462	1893	842	1208	474	599	582	1241	949	1131	593	483	610	1617	1512	997	561	917	836	1290	1219	1228	701	409	680	1854	1616	1277	786	762	712
ENSGALG00000014880	21	25	18	21	11	30	15	8	6	115	34	143	3	15	10	41	70	37	3	0	6	41	16	56	9	5	16	11	41	18	14	12	0	19	39	60	9	19	16	33	27	25	10	25	9
ENSGALG00000007843	9247	1142	13558	4135	581	455	2880	5395	3706	6024	316	10155	686	3270	2216	9074	6120	766	967	377	973	479	4427	744	2479	193	161	4449	308	4341	2011	2042	464	287	168	521	1115	57	1209	343	446	5573	135	90	1408
ENSGALG00000007861	1794	2176	2279	991	1228	1144	706	772	882	2908	1896	2689	232	622	498	1576	1060	1500	224	269	310	1388	1350	1552	386	65	357	1253	1151	1177	188	293	91	745	1151	1109	149	342	219	917	1101	997	284	286	182
ENSGALG00000007755	676	761	325	157	192	209	107	57	63	117	14	13	13	29	38	9	18	3	39	5	13	18	0	16	22	3	44	3	20	7	64	21	5	8	4	0	9	0	13	0	3	0	6	10	3
ENSGALG00000025264	0	0	0	0	0	0	0	0	0	0	0	0	0	0	0	0	0	0	0	0	0	0	0	0	0	0	0	0	0	0	2	0	0	0	0	0	0	0	0	0	0	0	0	0	0
ENSGALG00000007750	2453	2806	2000	1439	1734	1880	1107	1274	976	1508	774	1000	475	1461	683	1337	1128	805	761	289	464	1196	1110	1167	964	100	791	840	860	832	445	558	147	761	1064	887	409	576	487	1193	1009	922	443	501	459
ENSGALG00000052050	109	120	164	40	28	23	20	21	24	31	11	11	0	2	12	0	3	5	5	0	7	6	0	4	6	4	5	0	5	0	18	12	0	2	3	3	0	0	6	7	0	0	2	4	0
ENSGALG00000007793	135	181	325	243	147	266	58	85	114	167	193	197	25	57	39	199	146	115	27	41	53	181	183	242	58	27	61	185	205	165	54	75	28	157	179	282	96	86	108	230	219	229	86	113	144
ENSGALG00000007806	32	54	60	42	71	42	27	48	25	23	18	14	65	9	16	3	30	6	165	32	73	49	0	26	174	39	119	3	0	10	87	291	52	0	6	6	431	37	124	0	0	0	246	106	562
ENSGALG00000007788	308	272	211	161	158	208	60	84	52	152	41	68	8	129	68	86	59	45	39	9	23	115	83	84	50	7	55	55	69	58	30	24	19	42	71	44	55	52	38	49	70	68	28	44	17
ENSGALG00000050618	2	4	9	0	4	11	0	0	0	4	4	0	0	0	0	0	3	0	0	0	0	0	10	0	0	0	4	0	0	0	0	0	0	0	0	5	0	2	5	0	0	0	0	0	0
ENSGALG00000012975	93	65	38	152	90	119	6	8	7	25	0	17	3	0	6	0	0	0	0	0	0	3	0	0	0	0	0	0	0	0	0	0	0	2	7	0	0	0	0	0	0	3	0	8	0
ENSGALG00000052931	14	39	29	16	0	12	0	0	0	34	18	14	0	5	0	0	0	0	0	0	0	0	0	0	0	0	0	0	0	0	0	0	0	0	0	0	0	0	0	0	0	0	0	0	0
ENSGALG00000053507	307	299	382	61	132	130	33	29	44	106	50	93	10	17	7	97	141	86	9	0	3	99	101	161	17	4	17	78	94	109	11	7	3	40	25	9	0	7	14	19	40	15	13	6	12
ENSGALG00000053509	288	281	354	82	113	130	38	45	55	317	213	256	47	37	22	173	159	174	31	40	26	170	106	138	43	7	47	71	79	135	21	24	22	68	103	96	28	17	22	127	86	160	33	34	18
ENSGALG00000012145	0	0	0	0	0	0	0	0	0	0	0	2	0	0	0	0	2	0	0	0	0	3	0	0	0	0	0	0	0	0	0	0	0	0	0	0	0	0	0	0	0	0	0	0	0
ENSGALG00000052938	7	1	13	4	2	2	0	0	0	3	0	2	4	0	1	2	1	6	1	0	3	3	3	3	0	0	0	17	3	2	3	3	9	7	0	6	1	2	0	7	6	6	2	2	1
ENSGALG00000012140	0	0	0	0	0	0	0	0	0	0	16	0	0	0	0	0	0	0	0	0	0	0	0	0	0	0	0	0	0	0	0	0	0	2	0	0	0	0	0	0	0	0	0	0	0
ENSGALG00000048460	3	0	3	0	2	0	0	0	2	5	7	12	0	0	0	1	0	0	0	2	0	0	2	7	0	0	1	0	7	4	6	0	0	6	10	7	0	4	10	1	6	0	2	0	0
ENSGALG00000048465	32	0	0	23	0	0	0	0	0	31	17	15	0	0	0	10	0	0	0	0	0	0	0	0	0	0	0	0	0	0	0	0	0	0	0	0	0	0	0	0	0	0	0	0	0
ENSGALG00000048464	2	0	0	0	0	0	0	0	0	0	0	0	0	0	0	0	0	0	0	0	0	0	0	0	0	0	0	0	0	0	0	0	0	0	0	0	0	0	0	0	0	0	0	0	0
ENSGALG00000048469	0	0	2	0	0	0	0	0	0	0	0	0	0	0	0	0	0	0	0	0	0	0	0	0	0	0	0	0	0	0	0	0	0	2	0	0	0	2	0	0	0	0	0	0	0
ENSGALG00000015737	15	11	7	22	7	20	4	5	7	0	0	0	0	4	3	0	0	0	0	0	0	0	3	0	0	0	0	0	0	0	0	0	0	0	0	0	0	0	0	0	0	3	0	0	0
ENSGALG00000009217	720	1015	518	402	373	546	149	218	164	339	190	362	121	151	84	354	222	239	50	29	25	389	403	227	89	40	103	191	364	259	48	115	30	145	234	133	65	64	75	172	198	160	48	62	35
ENSGALG00000054184	0	0	0	0	0	0	0	0	0	0	0	1	0	0	0	2	2	2	0	0	0	1	1	1	0	1	1	1	6	0	1	0	0	1	14	1	0	10	0	2	7	0	3	28	0
ENSGALG00000008709	0	4	5	2	2	0	0	0	0	9	10	13	2	0	0	11	4	9	0	2	0	5	0	20	2	0	0	0	12	0	0	0	0	0	4	2	0	3	0	0	8	7	0	7	7
ENSGALG00000009048	19	44	25	77	88	154	43	46	30	69	64	84	26	12	11	363	174	236	22	8	24	426	230	147	50	6	52	198	307	261	58	24	3	141	288	233	27	20	22	82	212	231	21	15	7
ENSGALG00000031404	9	246	125	115	140	183	102	114	86	255	66	157	28	146	79	161	83	91	75	28	79	141	171	204	94	22	112	78	160	116	50	79	29	76	129	101	112	80	47	72	58	16	43	72	35
ENSGALG00000020679	0	0	1	0	0	0	0	2	0	46	0	7	0	0	0	5	0	0	0	0	0	2	4	0	0	0	4	0	0	0	0	0	0	3	0	0	0	0	0	0	0	0	0	0	0
ENSGALG00000008938	1180	1332	963	334	354	544	99	130	162	293	183	343	20	130	135	189	126	139	50	81	55	166	131	145	101	24	102	129	129	126	60	99	14	63	68	79	78	124	54	92	71	86	95	115	62
ENSGALG00000008914	464	482	296	4590	2303	3578	6913	8564	5721	33	13	178	888	8983	3964	4	147	0	1719	2974	1242	0	10	0	3196	462	4096	5	17	0	1863	5752	1324	7	2	0	4116	4770	3222	0	3	0	9036	4446	11966
ENSGALG00000051727	9	9	7	4	5	7	0	2	0	6	15	12	7	0	0	8	4	8	3	6	3	6	11	2	2	2	0	2	4	0	2	0	0	7	0	4	0	4	0	0	0	0	2	5	2
ENSGALG00000008704	105	85	173	91	150	158	112	261	119	87	68	78	23	31	19	5	8	9	56	71	31	0	0	0	43	5	51	2	19	28	24	37	8	5	5	5	36	41	12	0	38	6	37	26	16
ENSGALG00000008999	275	197	274	203	482	585	169	107	89	111	0	104	24	46	33	49	34	79	21	7	26	125	208	60	38	30	91	109	238	39	108	179	162	53	106	36	37	44	39	85	33	24	41	0	22
ENSGALG00000008946	622	698	315	268	395	363	274	227	153	412	168	194	39	205	147	293	169	137	97	66	57	255	197	211	158	13	161	128	217	211	130	104	11	135	196	94	48	90	95	89	122	68	56	57	27
ENSGALG00000008949	47	61	95	31	57	78	123	77	51	109	104	111	47	36	0	118	126	98	39	27	50	169	137	184	45	32	86	108	132	199	62	53	80	141	87	220	36	115	158	143	180	143	59	76	72
ENSGALG00000053176	0	0	2	1	0	1	0	2	0	2	5	2	0	0	0	1	1	2	0	1	0	1	1	0	0	0	1	2	0	0	0	1	0	0	0	0	0	0	0	0	0	0	0	0	0
ENSGALG00000042705	157	163	123	465	343	335	177	51	143	0	0	8	26	392	119	0	14	0	27	8	62	0	0	0	95	87	102	0	0	0	172	125	43	0	0	0	4	58	5	0	0	0	151	72	170
ENSGALG00000047993	12	12	16	12	8	15	11	5	5	14	0	9	3	5	0	5	10	8	8	5	0	0	0	0	7	4	0	0	0	15	0	4	0	0	0	1	0	6	0	0	0	2	2	5	0
ENSGALG00000016586	1007	1111	1529	195	1200	199	1086	1217	1322	315	1372	335	923	910	679	7	23	1590	769	1472	319	1373	18	325	1302	655	1091	1356	1072	200	1118	1446	1439	1002	874	1194	1635	1241	1227	1659	1386	1235	1503	1730	1922
ENSGALG00000016583	314	294	350	164	126	138	141	220	186	1103	403	260	152	105	92	74	81	75	79	74	99	84	80	97	95	67	69	79	51	58	113	115	254	23	36	33	98	123	96	95	38	15	86	98	79
ENSGALG00000016582	109	999	1082	116	214	260	73	195	309	981	355	752	73	82	63	29	32	61	0	31	32	62	61	88	18	41	6	16	25	19	13	21	26	10	23	48	10	21	5	31	33	4	23	11	0
ENSGALG00000016580	574	1081	1035	1211	1302	1096	1812	1381	935	2318	6577	3509	2186	481	297	6837	4699	2810	558	601	432	5008	1681	5753	934	517	918	1468	944	1236	1100	388	798	435	759	680	167	337	570	1124	794	260	365	814	148
ENSGALG00000045940	0	0	0	17	3	2	15	0	0	360	185	35	28	0	0	123	209	78	22	9	8	120	18	38	22	0	8	13	15	30	7	4	4	23	18	0	0	19	2	45	24	10	3	7	0
ENSGALG00000053296	0	0	0	0	0	2	0	0	0	836	592	247	16	5	5	78	407	114	11	11	8	100	52	30	10	10	6	54	16	4	0	0	0	54	34	19	6	17	0	62	13	28	15	23	0
ENSGALG00000016595	109	240	274	151	144	152	125	133	165	379	1013	619	232	87	52	779	187	750	68	92	71	789	658	892	108	90	188	660	900	603	102	156	140	630	856	1317	42	112	136	962	557	212	114	72	78
ENSGALG00000016591	0	5	4	0	3	2	0	0	0	119	37	7	0	0	0	0	0	0	0	0	0	10	1	0	4	0	0	0	0	0	0	0	0	0	0	0	0	0	0	0	0	0	0	2	0
ENSGALG00000011831	7702	10471	3559	6027	6447	6024	1794	1669	2203	1894	338	1059	410	1269	896	1315	1021	1089	775	175	610	1637	1808	1460	1014	346	1822	1408	2163	1821	935	833	275	704	1190	647	395	490	589	1012	787	707	451	479	301
ENSGALG00000053932	0	0	0	0	0	0	0	0	0	8	0	0	0	0	0	5	4	0	2	0	2	0	0	0	0	0	0	0	0	0	2	0	0	0	0	0	0	4	0	0	0	0	0	0	0
ENSGALG00000053931	2	1	4	2	2	0	1	1	0	17	1	5	0	2	0	16	2	1	5	3	8	29	1	16	2	1	0	3	5	2	2	1	0	7	3	8	1	1	0	12	1	9	1	2	0
ENSGALG00000053930	24	20	30	0	6	2	0	0	6	13	0	10	2	0	0	7	0	0	0	2	0	7	7	7	7	0	0	0	8	0	0	4	0	4	0	0	0	0	0	0	0	0	8	0	0
ENSGALG00000053935	0	0	0	0	0	0	0	0	0	2	0	0	0	0	0	0	0	0	0	0	0	0	0	0	0	0	0	0	0	0	2	0	0	5	0	0	0	0	0	0	0	4	0	0	0
ENSGALG00000054628	8	0	0	0	0	0	0	0	4	5	0	0	0	0	0	0	0	0	0	0	0	0	0	0	3	0	3	0	0	0	3	0	0	0	0	0	0	0	0	0	0	0	0	0	0
ENSGALG00000054627	0	0	0	0	0	0	0	0	0	0	0	0	0	0	0	0	0	0	0	0	0	0	0	0	0	0	0	0	0	0	0	0	0	1	0	0	0	0	0	0	0	0	0	0	0
ENSGALG00000054625	4	3	4	0	0	7	3	0	0	3	4	3	0	0	0	0	6	0	0	0	0	0	0	0	0	0	0	6	0	0	0	0	0	0	0	0	0	3	0	0	0	0	0	0	0
ENSGALG00000054622	9	3	11	0	0	0	0	0	0	4	0	0	0	0	0	0	0	0	0	0	0	0	0	0	0	0	0	0	0	0	0	0	0	0	0	0	0	0	0	0	0	0	0	0	0
ENSGALG00000054620	1	1	0	0	0	0	0	1	0	0	0	0	1	0	0	0	0	0	0	0	0	0	0	0	0	0	0	0	0	0	0	1	0	0	0	0	0	0	0	0	0	0	0	0	0
ENSGALG00000054621	0	3	3	0	0	0	0	0	0	0	0	0	0	0	0	0	7	0	0	2	0	0	0	0	7	0	3	0	0	0	0	0	0	0	0	0	0	0	0	0	6	0	0	0	0
ENSGALG00000014466	18	36	27	9	19	12	6	20	3	10	0	7	5	0	0	4	14	14	3	7	3	15	22	7	0	7	7	4	20	0	20	3	4	8	4	8	2	3	10	14	0	3	20	3	5
ENSGALG00000050815	23	20	10	15	20	22	0	12	2	27	24	14	2	48	0	0	18	22	4	24	4	0	6	10	30	0	12	0	4	2	8	30	0	2	2	0	10	2	0	0	0	0	16	2	67
ENSGALG00000013287	2	0	0	0	0	0	0	0	0	0	0	0	0	0	0	0	0	0	0	0	0	0	0	0	0	0	0	0	0	0	0	0	0	0	0	0	0	0	0	0	0	0	0	0	0
ENSGALG00000012308	120	116	127	248	277	299	55	174	110	381	261	295	50	55	20	511	492	521	35	62	43	436	315	599	124	15	133	544	472	512	31	51	16	367	525	421	18	42	43	540	424	475	39	29	13
ENSGALG00000012304	141	81	125	104	340	332	232	379	83	830	80	519	96	251	159	860	695	578	208	258	196	684	548	1047	318	65	328	381	678	441	210	275	70	623	182	621	233	259	240	98	821	543	284	402	234
ENSGALG00000027860	203	235	242	200	189	183	264	169	235	239	144	189	131	88	75	192	123	186	82	91	73	157	144	158	149	18	117	142	150	108	40	116	16	186	178	178	120	120	133	181	160	235	162	88	67
ENSGALG00000012311	4355	5737	6755	3945	3889	4318	4665	7139	4337	5381	4266	5448	2678	4928	2411	5976	4876	4612	3602	3954	2835	5243	3781	5796	5545	1187	3921	3831	5118	3895	1557	3735	684	3582	4060	4992	2315	2955	2149	4824	5015	4576	4084	3817	4033
ENSGALG00000012338	179	267	321	289	297	244	250	308	230	464	434	459	62	190	100	656	552	430	113	178	180	582	235	626	209	37	206	338	231	270	73	102	28	373	336	322	160	191	165	337	483	435	210	206	150
ENSGALG00000012319	156	242	257	204	378	361	137	97	82	103	115	92	22	118	94	119	84	98	27	29	30	65	82	88	47	11	40	69	86	140	14	16	9	191	114	97	6	14	9	64	101	184	0	13	10
ENSGALG00000013281	5	10	7	0	3	2	0	0	0	342	66	11	0	4	0	0	11	5	0	0	0	0	0	0	4	0	0	0	0	0	0	0	0	0	0	0	0	0	0	0	0	7	0	7	0
ENSGALG00000013208	1993	2343	1257	133	363	340	107	268	509	873	315	1080	15	113	189	17	31	61	4	40	3	60	21	53	21	0	57	0	6	18	4	7	5	17	19	20	5	19	2	0	0	0	4	6	0
ENSGALG00000029714	218	328	338	172	292	302	161	175	226	195	321	176	234	63	69	184	168	218	32	22	73	286	596	243	62	24	31	200	198	227	60	51	225	151	433	636	73	130	106	216	228	270	79	131	80
ENSGALG00000012836	1145	1153	1724	315	441	496	273	665	756	1055	712	1132	227	152	207	90	114	148	40	77	49	181	131	254	45	60	92	121	117	129	126	80	97	98	105	243	36	77	57	115	160	156	94	74	64
ENSGALG00000035194	676	950	1224	458	743	703	89	233	177	718	581	158	289	139	177	904	836	1166	184	103	310	760	1273	1473	163	154	384	470	743	635	376	427	206	456	512	708	115	204	102	471	524	620	260	386	166
ENSGALG00000000120	0	3	20	0	7	0	0	0	0	4	3	0	0	0	0	3	0	0	0	0	0	0	0	0	0	0	0	0	0	0	0	0	0	0	0	0	0	0	0	0	0	0	0	0	0
ENSGALG00000039187	0	27	44	0	0	0	0	0	0	24	0	9	0	0	0	0	0	0	0	0	0	0	0	0	0	0	0	0	0	0	0	0	0	0	0	0	0	0	0	0	0	0	0	0	0
ENSGALG00000030603	777	1119	984	317	644	629	104	85	102	538	338	479	110	115	86	1013	441	421	70	53	127	730	581	1110	96	72	252	443	409	554	173	168	25	227	362	292	25	36	25	329	452	326	69	35	16
ENSGALG00000036391	5039	5716	6137	1692	2475	2812	480	669	882	118	1492	3860	392	381	311	2987	2059	2661	173	51	289	2397	2575	2343	311	216	423	3241	48	3364	374	638	190	1838	2747	2492	159	321	184	2071	2744	2247	296	376	176
ENSGALG00000008297	175	229	589	478	441	472	288	397	250	201	688	249	224	78	59	178	385	43	38	80	62	363	598	595	52	78	36	269	50	165	54	142	386	396	158	229	90	81	109	275	223	191	69	139	21
ENSGALG00000030046	0	0	0	0	0	0	0	0	0	1	0	0	0	0	0	0	0	0	0	0	0	0	0	0	0	0	0	0	0	0	0	0	0	0	0	0	0	0	0	0	0	0	0	0	0
ENSGALG00000041911	387	412	272	205	229	314	140	111	114	395	104	185	97	134	105	174	163	158	100	28	81	267	237	141	124	84	131	169	220	205	87	97	73	134	189	126	64	125	106	138	108	92	75	103	83
ENSGALG00000051674	2105	2473	2022	2000	2055	2271	683	827	773	519	326	517	453	363	210	984	581	564	166	83	220	820	607	645	276	266	234	709	631	601	288	281	459	411	518	467	138	238	200	491	474	409	174	232	139
ENSGALG00000035976	150	67	195	177	96	157	161	196	222	39	66	93	123	54	45	72	29	37	147	287	146	14	17	57	71	76	153	41	40	19	86	78	109	23	16	50	143	41	145	27	47	23	88	85	104
ENSGALG00000047140	9	15	10	0	6	8	5	6	14	21	16	12	0	0	0	19	2	20	0	0	5	11	10	0	6	0	6	15	2	2	4	2	0	0	2	0	0	2	0	28	6	4	0	0	0
ENSGALG00000047146	2	0	5	0	0	0	0	0	0	0	0	0	0	0	0	0	0	0	0	0	0	0	0	0	0	0	0	0	0	0	0	0	0	0	0	0	0	0	0	0	0	0	0	0	0
ENSGALG00000008691	41	328	499	192	193	289	62	102	81	243	312	43	33	52	30	26	181	27	24	62	32	219	248	358	70	16	57	19	175	226	43	46	6	209	152	1	49	110	25	354	207	14	83	42	40
ENSGALG00000008702	6	8	13	3	2	0	0	0	0	63	5	10	0	0	0	0	0	0	3	0	0	6	0	11	0	0	0	0	8	0	6	0	0	0	0	0	0	0	0	0	0	0	0	0	0
ENSGALG00000008707	1817	1977	2045	1015	1169	1243	786	1018	1241	1204	659	900	508	1029	588	1522	805	939	438	602	488	1261	730	1431	702	189	707	1161	845	927	388	565	260	901	761	667	511	555	490	1084	964	752	583	497	517
ENSGALG00000008731	78	46	65	12	10	32	6	9	14	85	27	23	5	10	12	19	10	28	19	0	1	6	16	8	4	0	0	6	4	12	0	3	0	5	3	0	2	2	9	14	0	0	2	1	0
ENSGALG00000008749	346	383	669	353	397	407	268	377	414	339	372	403	178	386	161	331	232	293	310	444	352	332	233	414	349	44	413	278	259	183	201	283	61	238	126	234	335	228	395	372	243	198	231	274	278
ENSGALG00000008793	396	1052	891	336	482	449	160	148	183	854	617	1017	106	68	64	553	566	653	48	98	43	546	498	635	119	82	96	515	614	532	77	127	122	364	428	444	62	112	102	522	467	494	151	145	98
ENSGALG00000033140	461	329	656	375	298	590	519	525	150	3	8	448	703	272	276	103	6	724	485	1152	737	380	8	614	121	836	896	3	509	6	863	807	1254	2	267	480	100	515	1124	446	324	45	872	382	781
ENSGALG00000008808	748	887	1098	555	514	526	558	551	719	610	600	575	310	819	497	462	397	328	691	836	891	263	240	540	1161	111	816	239	223	175	317	459	142	200	169	187	548	458	619	193	275	217	620	558	533
ENSGALG00000041236	19	9	11	19	26	23	19	27	20	33	5	13	23	11	4	31	24	14	22	7	14	24	21	36	26	6	25	9	15	4	11	7	5	7	17	5	9	13	15	3	9	5	2	15	5
ENSGALG00000012178	546	602	571	913	838	1037	557	595	527	842	448	1021	127	250	197	728	876	893	129	141	129	1771	1824	2202	198	96	343	575	1271	1037	586	515	168	1211	744	804	203	98	145	988	867	654	274	258	145
ENSGALG00000041604	63	63	130	127	118	102	85	85	85	29	6	54	37	34	103	18	25	19	37	7	15	27	8	31	48	23	13	6	4	6	33	53	81	7	12	7	11	24	5	16	21	17	10	21	12
ENSGALG00000036867	1342	1219	681	1412	1343	1524	950	944	796	391	96	236	473	834	490	181	215	147	154	28	152	251	326	365	223	134	142	217	178	178	124	205	86	63	130	127	111	332	207	69	89	61	125	206	64
ENSGALG00000049586	68	54	25	3	0	54	0	0	4	9	0	2	0	0	4	0	0	3	0	0	0	2	12	2	0	2	0	2	6	18	0	0	0	0	9	0	0	0	0	0	0	3	0	0	0
ENSGALG00000029382	445	505	778	226	162	280	52	23	69	427	171	212	5	9	0	107	26	108	3	5	0	24	52	26	0	0	0	100	83	69	28	8	5	65	113	46	11	13	7	51	79	104	12	20	10
ENSGALG00000028230	212	201	259	162	266	198	309	349	191	113	38	123	174	229	76	248	219	260	109	25	80	448	458	453	110	40	54	170	246	235	49	89	160	170	261	102	32	114	88	238	161	149	57	98	50
ENSGALG00000034504	1	0	0	0	4	0	0	2	0	0	0	0	0	0	0	1	0	0	1	2	0	3	8	0	0	0	0	0	0	0	0	0	0	8	0	0	1	1	0	8	0	11	0	0	6
ENSGALG00000001161	1157	1211	1014	1646	209	226	766	1022	882	2091	1640	244	314	725	414	340	265	3152	542	510	504	513	308	4963	1138	225	1588	2526	440	365	78	125	277	2901	2831	3733	647	819	1239	3294	90	247	1211	882	551
ENSGALG00000030783	4662	5511	5924	4574	4342	4736	2416	2477	2419	2964	1838	3146	1817	2571	1759	3195	2051	3129	835	928	1254	3149	2930	3238	1296	974	1364	2964	2974	2532	1835	1670	1692	2042	2094	2222	686	1181	835	2472	2128	2363	1195	1375	956
ENSGALG00000001181	642	834	961	1779	1307	1149	889	788	525	153	85	262	73	338	130	87	133	184	13	10	27	172	233	287	24	35	23	58	342	112	113	72	166	74	583	1153	10	64	127	103	319	229	58	66	26
ENSGALG00000001167	0	3	0	0	0	8	0	0	0	0	0	0	0	0	0	3	0	0	2	0	0	0	0	4	0	0	0	0	0	0	0	0	0	0	6	0	0	0	0	0	0	4	0	0	0
ENSGALG00000051028	2	1	0	1	1	1	0	0	0	1	0	1	0	1	0	1	0	0	0	0	0	0	0	0	1	0	0	0	0	0	1	1	0	0	0	0	0	0	0	2	0	0	0	0	0
ENSGALG00000029197	180	235	254	118	165	155	33	75	82	40	5	68	71	27	16	12	1	7	5	0	8	17	16	27	12	11	9	18	12	30	15	17	9	5	2	12	0	6	3	5	10	6	15	9	4
ENSGALG00000001143	642	1143	584	1208	1046	1235	502	411	565	780	110	603	140	237	195	786	902	826	191	110	196	1335	791	1466	352	107	579	679	1589	905	315	691	270	696	876	613	244	226	440	573	375	396	301	419	170
ENSGALG00000038377	12	8	6	16	5	14	11	5	2	21	11	13	0	3	2	29	19	28	0	8	0	46	38	50	11	0	10	31	35	27	6	2	0	61	18	0	0	3	0	15	39	13	0	7	0
ENSGALG00000012422	0	0	3	0	2	0	0	0	0	10	0	15	0	0	0	19	23	23	5	2	0	22	32	19	5	11	7	7	26	6	4	7	9	6	13	10	2	14	6	4	10	0	0	9	0
ENSGALG00000052718	2	0	0	0	0	0	0	0	0	0	0	9	0	0	0	0	0	0	0	0	0	0	0	0	0	0	4	0	0	0	0	0	0	0	0	0	0	0	0	0	0	0	0	0	0
ENSGALG00000052714	0	0	3	0	0	0	0	6	0	0	0	0	0	0	0	0	0	0	0	0	0	0	0	0	0	0	0	0	0	0	0	0	0	12	0	9	0	10	0	0	0	0	0	0	0
ENSGALG00000052715	28	18	36	12	14	13	10	13	7	25	4	8	3	10	8	14	5	8	0	10	0	11	8	5	3	0	3	0	0	3	3	8	0	6	3	3	4	4	3	0	2	0	0	2	4
ENSGALG00000052716	3	6	8	0	0	0	0	0	0	0	0	0	0	0	0	10	2	6	0	0	2	4	0	0	0	2	0	0	10	0	0	3	0	0	0	0	0	0	0	0	3	5	0	0	4
ENSGALG00000052717	30	13	39	0	0	3	0	0	0	7	0	0	0	4	0	0	0	0	2	0	2	0	0	0	0	0	0	0	0	0	0	0	0	12	2	5	0	2	0	0	0	0	0	7	0
ENSGALG00000052710	0	0	0	0	0	0	0	0	0	6	16	0	0	0	0	0	0	0	0	0	0	0	0	0	0	0	0	0	0	0	0	0	0	0	0	0	0	0	0	0	0	0	0	0	0
ENSGALG00000052713	0	0	0	0	0	0	0	0	0	0	0	0	0	0	0	2	0	1	0	0	0	0	0	0	0	0	0	0	0	0	0	0	0	0	1	0	0	0	3	0	0	0	0	0	0
ENSGALG00000051072	32	65	58	40	46	54	53	48	17	83	79	119	32	20	20	36	97	88	11	5	36	72	72	71	28	23	37	48	34	46	20	16	34	34	49	32	17	27	21	63	25	42	28	31	7
ENSGALG00000042708	61	60	91	112	41	66	129	84	11	173	164	159	62	28	44	105	222	254	21	31	69	224	94	228	102	25	78	138	44	91	88	21	30	70	63	80	60	28	43	122	28	63	68	17	19
ENSGALG00000054162	0	0	0	0	0	0	0	0	0	0	0	0	0	0	0	0	0	0	0	0	1	0	0	0	1	0	0	1	2	1	0	0	0	0	1	1	0	5	2	1	1	0	0	3	0
ENSGALG00000050085	0	0	0	0	0	0	0	0	0	0	0	0	0	1	0	0	0	0	0	0	0	0	1	0	0	5	3	3	3	1	0	2	1	0	1	0	0	0	0	0	0	0	0	1	1
ENSGALG00000045285	1	1	2	0	0	0	0	0	0	0	0	0	4	0	0	0	0	0	0	0	1	1	1	2	1	0	0	0	1	6	0	1	2	0	2	0	0	1	1	0	1	1	3	8	0
ENSGALG00000047310	0	0	1	0	0	0	0	0	0	0	0	0	0	0	0	0	0	0	0	0	0	1	1	0	0	0	1	1	3	1	1	1	1	0	4	4	0	1	1	0	2	2	2	2	1
ENSGALG00000054241	21	13	23	20	8	28	17	4	6	15	11	22	10	3	3	43	12	23	10	2	14	21	6	16	7	0	13	10	14	1	6	11	1	14	9	7	6	2	11	23	0	17	12	1	5
ENSGALG00000050716	2	0	0	2	0	0	0	0	0	0	0	0	0	0	0	0	0	0	0	6	0	0	0	0	0	0	0	0	0	0	0	0	0	0	0	0	0	0	0	0	0	0	0	0	0
ENSGALG00000050714	0	0	0	0	0	0	0	0	0	2	0	0	0	0	0	0	0	0	0	0	0	0	0	0	0	0	0	0	0	0	0	0	0	7	0	0	0	0	0	0	0	0	0	0	0
ENSGALG00000050710	0	0	0	0	0	0	0	0	0	0	0	0	0	0	0	0	0	0	0	0	0	0	0	0	0	0	0	0	0	0	0	0	0	1	0	1	0	1	0	0	0	0	0	0	0
ENSGALG00000050711	0	0	0	0	0	0	0	0	0	1	0	0	0	0	0	2	0	0	0	0	0	0	0	0	0	0	0	0	0	0	0	0	0	0	0	0	0	0	0	0	0	0	0	0	0
ENSGALG00000017289	256	329	282	250	324	244	54	150	166	134	112	141	41	50	48	74	61	60	42	151	32	52	37	98	126	21	32	51	66	32	29	75	0	31	66	43	58	28	65	86	92	64	95	56	26
ENSGALG00000017290	548	606	745	271	418	407	178	102	279	772	754	755	32	278	143	462	362	429	65	188	79	369	230	539	169	17	252	259	228	222	92	90	27	209	196	238	83	126	125	245	218	333	291	228	142
ENSGALG00000017291	290	416	44	164	182	256	72	38	107	557	108	119	19	122	104	126	145	120	44	41	45	196	151	225	74	18	129	91	142	116	77	77	25	71	134	55	107	108	155	61	64	99	112	167	132
ENSGALG00000046686	81	57	79	27	41	56	13	25	20	63	59	57	0	11	13	75	14	28	11	15	4	47	34	55	22	4	11	23	12	45	30	8	7	26	26	26	7	29	11	18	32	55	21	11	10
ENSGALG00000051865	3	2	3	0	0	0	2	9	0	10	37	9	0	6	0	9	3	9	1	11	3	18	2	13	19	0	3	3	0	3	4	0	0	0	10	10	0	6	0	0	0	3	0	7	0
ENSGALG00000031666	161	234	173	232	441	270	99	167	73	214	103	127	6	242	69	107	56	105	13	69	16	94	96	182	47	2	29	131	62	72	62	30	8	100	152	103	52	67	61	61	212	120	71	35	49
ENSGALG00000049576	16	24	48	8	22	23	0	0	8	12	0	9	3	4	0	6	3	6	0	0	6	0	0	16	0	0	4	3	0	22	6	6	0	20	3	10	6	6	11	20	10	34	6	0	16
ENSGALG00000017295	184	81	90	37	53	51	0	17	24	14	11	52	28	23	11	83	32	34	12	54	25	107	43	105	24	15	39	61	19	16	10	23	6	0	24	31	14	23	7	0	11	12	36	19	15
ENSGALG00000026776	395	269	375	357	243	304	933	476	392	272	235	277	344	1087	366	188	153	126	454	1047	714	178	175	158	607	103	421	306	237	177	543	1023	226	267	224	244	1662	1125	746	351	348	227	1684	1264	866
ENSGALG00000027791	7	0	0	0	0	5	0	0	0	9	0	0	0	0	0	0	0	0	0	0	0	0	0	0	5	0	0	0	0	3	0	0	0	0	0	0	0	3	0	0	3	0	4	0	0
ENSGALG00000000109	260	265	471	187	203	218	98	124	80	162	148	267	62	65	31	164	120	173	65	42	51	184	164	179	40	46	38	211	111	183	83	59	104	110	138	159	62	59	98	209	167	182	59	53	54
ENSGALG00000007191	2480	958	3893	8	11	5	528	371	1452	5	1055	887	264	326	408	121	88	152	27	50	76	195	202	402	87	130	108	112	120	123	104	102	118	39	103	136	29	144	49	42	37	60	82	47	20
ENSGALG00000027902	1290	1534	1757	3558	2796	2845	5231	6284	4147	2054	1931	2443	6203	3431	2021	2229	1611	2323	3601	4046	2746	2102	1239	1708	4041	3129	2613	1970	1941	2159	3171	2459	4522	1146	1555	2164	2857	2671	2984	2207	1625	1918	3081	3830	3209
ENSGALG00000038875	198	205	236	134	129	148	131	120	74	62	49	96	102	39	9	123	84	102	32	14	27	141	132	102	39	14	43	48	46	65	62	23	37	49	58	101	19	31	64	26	35	57	29	23	38
ENSGALG00000038671	318	648	752	652	982	943	780	1045	719	4055	6499	4701	903	370	191	3948	4263	4731	395	642	539	4503	3477	4277	684	756	946	3112	3705	3848	658	812	816	3778	3696	6264	557	979	1429	3631	4067	4275	803	1080	724
ENSGALG00000019795	324	311	441	241	198	342	121	133	150	564	876	394	124	97	75	385	426	295	71	64	53	236	190	371	83	102	94	143	200	215	70	129	129	167	189	262	60	120	150	253	242	114	111	145	44
ENSGALG00000052581	37	35	61	58	40	79	26	26	39	10	12	11	21	10	0	15	11	24	0	0	0	17	21	16	12	0	5	3	15	22	0	6	10	6	11	12	0	5	3	20	7	6	0	0	0
ENSGALG00000007224	455	505	459	462	369	409	342	282	324	444	215	578	502	277	135	555	553	482	131	110	142	686	373	511	202	153	137	532	398	573	263	160	333	478	474	552	188	174	225	594	411	547	246	289	230
ENSGALG00000045753	217	300	728	607	531	461	772	765	721	326	560	443	601	306	239	294	457	347	215	422	374	468	330	475	307	290	285	366	167	349	220	312	935	274	284	459	627	436	810	418	396	304	320	636	415
ENSGALG00000032336	209	207	742	179	219	109	82	27	105	154	72	92	92	33	18	263	491	88	27	23	45	694	455	565	35	19	27	303	130	479	46	27	80	577	283	394	31	69	96	426	558	286	46	44	56
ENSGALG00000008063	3	2	2	2	3	0	0	0	0	0	0	0	0	0	0	0	0	0	0	0	0	3	1	0	0	0	0	2	0	0	0	0	0	0	0	0	0	1	0	0	0	0	0	2	0
ENSGALG00000039880	463	654	70	26	453	29	638	620	528	857	1122	1306	67	503	282	1128	589	569	532	1423	1212	1122	906	1508	1022	565	3	1015	717	734	527	1288	494	1069	637	1122	1737	1183	83	1321	1142	1203	1408	67	102
ENSGALG00000023454	9	4	24	9	4	6	4	4	0	895	290	3	4	0	0	14	0	6	0	0	3	13	9	0	0	0	0	0	23	0	0	0	0	0	3	0	0	0	0	9	0	6	2	0	4
ENSGALG00000006181	308	302	480	268	299	314	296	48	293	1455	1115	1144	144	500	320	2380	1001	1248	253	569	298	1497	1482	1486	402	65	436	1543	1731	1634	227	453	95	1397	6	1615	744	1068	581	2380	2417	2011	1119	792	1016
ENSGALG00000019690	789	922	1247	264	397	416	117	168	136	867	1097	1313	90	38	34	3640	1827	1265	31	37	36	3934	2367	4058	30	29	91	1041	936	1333	60	66	46	1004	685	849	37	60	54	749	903	1240	74	66	24
ENSGALG00000006189	25	24	27	11	14	10	11	17	0	37	109	58	11	9	13	19	19	25	7	28	7	78	88	42	15	0	5	13	32	35	9	15	7	27	27	51	8	26	12	33	54	75	13	25	13
ENSGALG00000053252	0	4	16	0	2	2	2	2	5	26	28	22	0	0	0	28	6	14	0	5	3	17	18	18	4	0	5	14	14	20	0	4	4	22	0	4	0	0	14	2	2	13	0	5	5
ENSGALG00000053090	0	0	0	0	0	0	0	0	0	0	0	0	0	0	0	0	0	0	0	0	0	2	0	0	0	0	0	0	0	0	0	0	0	0	0	0	0	0	0	0	0	0	0	0	0
ENSGALG00000006173	71	27	103	22	24	46	0	8	9	72	23	50	0	13	9	45	25	47	10	2	9	15	9	36	16	2	20	18	20	10	5	0	0	13	3	0	0	2	6	5	6	3	0	6	0
ENSGALG00000047432	9	17	6	15	2	23	0	0	0	12	9	3	0	0	0	27	2	14	0	2	0	12	14	0	0	0	10	15	2	0	0	0	0	0	3	16	0	0	0	0	24	6	0	0	0
ENSGALG00000010116	0	0	0	0	0	0	0	2	2	0	0	2	0	0	0	0	0	0	0	0	0	0	0	0	0	0	0	0	0	0	0	3	0	20	0	0	0	0	3	0	0	0	0	0	0
ENSGALG00000047928	0	0	0	0	0	0	4	2	0	4	0	0	0	0	0	0	0	0	6	5	5	0	0	0	0	0	0	0	0	0	0	0	0	0	0	0	0	0	0	0	0	0	0	0	0
ENSGALG00000047926	0	2	0	0	2	0	0	0	0	0	0	3	0	0	0	9	0	5	0	0	0	16	0	0	0	0	0	8	0	0	0	0	0	3	0	10	0	0	0	6	11	8	6	0	0
ENSGALG00000047922	0	0	0	0	0	0	0	0	0	0	0	0	0	0	0	0	0	0	0	0	0	0	0	0	0	0	0	0	0	0	0	0	0	3	0	0	0	0	0	0	0	0	0	0	0
ENSGALG00000039883	286	269	267	100	175	183	91	80	88	126	125	125	16	40	52	184	110	100	30	16	19	150	221	220	55	8	31	61	153	127	67	52	35	80	113	71	36	58	36	100	74	78	34	42	39
ENSGALG00000029316	947	1024	633	575	442	779	390	277	336	749	128	405	229	593	229	331	270	367	197	40	180	390	475	317	274	118	302	215	415	346	171	220	120	191	255	181	101	197	181	161	166	215	142	213	120
ENSGALG00000049750	0	0	0	105	55	88	17	20	8	0	0	0	0	6	0	0	0	0	0	0	0	0	0	0	0	0	0	0	0	0	0	0	0	0	0	0	0	2	0	0	0	0	0	4	0
ENSGALG00000006197	2784	1172	3357	587	334	278	1524	416	1602	1940	101	672	400	1177	314	1674	704	499	758	1514	240	140	984	1309	1001	68	834	363	169	346	656	314	470	66	87	408	853	932	281	77	1453	93	327	1197	325
ENSGALG00000006201	248	397	264	451	518	489	406	397	339	331	168	428	295	315	165	365	333	351	224	60	181	356	470	317	255	346	195	502	479	455	237	231	355	196	356	201	192	212	174	182	346	227	108	230	186
ENSGALG00000054306	174	242	572	456	393	306	206	247	235	971	1423	1852	662	69	95	821	910	1092	121	231	81	1098	1684	1217	159	79	124	2153	2331	2345	98	111	193	2343	2257	3819	85	221	122	2892	2206	1590	235	301	94
ENSGALG00000032207	25111	27842	37439	11761	13363	15270	6620	12391	13440	10617	8446	13943	7003	4518	3585	6760	6064	6523	1996	4755	3332	8976	5387	10034	3387	3274	4144	4282	4367	3776	2515	4399	2893	4662	3199	5220	3272	2951	3512	5604	5254	3789	4026	6139	2922
ENSGALG00000006194	160	282	186	131	81	153	108	40	93	209	130	131	145	46	35	30	107	76	46	21	32	123	189	124	46	34	27	91	150	101	54	54	93	150	120	142	99	107	57	220	144	100	92	99	65
ENSGALG00000028912	58	62	61	54	48	79	6	0	0	0	0	2	2	0	0	0	0	2	2	0	0	0	0	0	0	0	5	0	0	0	0	0	0	0	0	0	0	0	0	0	4	0	0	0	0
ENSGALG00000040755	209	283	331	504	637	794	702	492	442	291	149	363	188	200	101	401	376	581	141	51	96	512	889	679	162	198	246	461	557	663	345	203	467	267	177	239	139	117	175	226	237	181	88	80	86
ENSGALG00000046425	55	44	403	487	531	549	328	205	176	4	67	7	130	12	11	0	50	0	4	2	32	48	75	67	2	4	0	67	17	40	0	0	53	149	66	50	169	76	66	112	52	26	139	211	76
ENSGALG00000004160	4513	5648	6035	2477	2742	2846	2247	1771	1997	2150	1258	2306	928	3295	2598	2371	1447	1388	1173	2856	2554	1679	1760	1883	1757	1036	1750	1659	1965	1465	2361	4403	2138	1392	1494	1707	3484	2925	2449	1856	1914	1410	3507	3648	3438
ENSGALG00000006203	28	15	36	36	38	59	21	34	50	97	170	175	28	4	9	51	45	153	2	11	9	48	72	66	0	0	16	129	110	133	10	6	2	108	89	143	5	4	4	145	113	105	12	0	1
ENSGALG00000041611	2	6	12	0	10	0	8	13	8	32	377	133	25	0	0	114	751	200	18	203	207	338	525	775	39	44	54	365	68	233	44	75	533	279	241	395	121	287	300	479	467	117	218	446	67
ENSGALG00000004101	59	36	78	3	15	0	0	0	0	8	0	0	0	0	0	0	0	0	0	0	0	0	0	0	0	0	0	0	0	0	3	0	0	0	0	0	0	0	0	0	0	0	0	0	0
ENSGALG00000042624	286	296	333	837	736	823	1269	1232	839	420	309	375	764	811	591	497	284	463	272	233	400	290	99	197	264	136	423	228	131	280	216	129	133	118	199	217	370	591	491	103	121	165	322	670	470
ENSGALG00000048119	0	0	0	0	0	0	0	0	0	0	0	0	0	0	0	0	0	0	0	0	0	0	0	0	0	0	0	0	0	0	0	0	0	1	0	0	0	0	0	0	0	0	0	0	0
ENSGALG00000048118	0	0	0	3	0	0	0	0	0	0	0	0	0	0	0	0	0	0	0	0	0	0	0	0	0	0	0	0	0	0	0	0	0	0	0	0	0	0	0	0	0	0	0	0	0
ENSGALG00000033517	0	0	0	0	0	0	0	0	0	4	10	0	0	0	0	0	6	2	0	0	0	0	2	0	0	0	0	0	0	0	0	0	0	0	0	0	0	0	0	0	0	0	0	0	0
ENSGALG00000048111	0	0	15	3	0	0	0	0	0	0	0	0	0	0	0	3	0	0	0	0	0	0	0	0	0	0	2	0	0	0	0	0	0	0	0	0	0	0	0	0	0	0	0	0	0
ENSGALG00000048110	6	10	14	2	3	4	3	5	14	4	0	4	0	0	0	0	2	0	0	0	0	0	0	4	12	0	2	2	0	0	6	0	0	16	0	0	0	0	6	0	0	0	3	0	0
ENSGALG00000048112	25	16	20	0	0	8	0	4	0	3	0	0	0	0	0	0	0	11	0	0	0	0	0	0	0	0	0	0	3	9	3	1	0	0	5	0	0	0	0	0	5	0	0	0	0
ENSGALG00000051632	0	0	7	0	0	0	0	0	4	11	0	0	0	0	0	0	0	0	3	0	0	0	0	0	0	0	0	0	0	0	0	3	0	13	3	0	0	3	0	0	0	0	3	0	3
ENSGALG00000021158	32	23	39	6	13	16	0	4	0	7	0	18	0	2	8	3	0	2	1	0	2	12	9	9	2	0	12	10	2	0	2	0	0	5	4	3	0	4	4	0	0	3	0	7	0
ENSGALG00000030724	0	0	0	0	0	0	0	0	0	0	0	0	0	0	0	0	0	0	0	0	0	0	0	0	0	0	0	0	0	0	0	0	0	2	0	0	0	3	0	0	0	0	0	0	0
ENSGALG00000012396	15	13	17	33	51	68	37	66	26	68	41	43	28	12	8	36	117	45	9	0	13	95	121	159	28	23	23	45	152	94	9	71	188	63	96	96	4	34	81	103	118	78	44	81	22
ENSGALG00000047585	25	9	24	21	12	7	5	9	9	134	56	101	0	9	0	53	96	67	10	2	12	72	10	47	8	0	10	64	33	44	17	10	0	27	15	25	6	37	5	55	33	31	7	14	8
ENSGALG00000012394	3705	4246	3304	11411	7112	9293	2854	2988	3291	529	215	408	1956	799	712	181	292	202	226	24	541	518	610	409	461	574	526	402	287	507	800	587	1232	118	343	125	253	613	566	152	122	73	485	601	249
ENSGALG00000029768	7	26	244	112	153	108	89	97	41	183	715	237	69	16	10	123	555	162	18	52	52	209	229	384	35	25	31	277	183	284	14	64	313	153	222	189	28	134	67	187	174	100	62	144	50
ENSGALG00000012379	738	1054	1491	619	918	849	474	646	598	674	677	808	413	701	665	517	483	465	564	1445	789	488	488	603	960	461	978	449	399	461	515	1048	444	338	341	468	1061	920	1462	472	387	342	1615	1478	1123
ENSGALG00000053371	7104	6969	9757	7367	7368	8332	1961	2986	3235	1193	966	2191	1775	1152	1118	424	535	736	459	1029	720	619	480	699	887	1108	1118	701	529	430	1220	1313	1299	224	362	356	263	395	340	303	307	224	834	608	306
ENSGALG00000012374	1286	1136	1427	1238	1722	1789	564	996	626	1092	946	1664	669	325	221	1175	959	905	238	227	306	1352	1006	1411	325	269	398	555	972	710	494	756	577	573	904	1151	204	224	184	816	806	527	325	390	180
ENSGALG00000027629	1431	1895	3269	979	998	957	119	137	170	1123	1322	1997	209	123	119	627	647	1013	60	203	102	672	733	1139	138	74	229	658	898	778	134	176	220	668	811	1063	81	175	136	1328	818	871	140	157	54
ENSGALG00000020340	65	99	90	32	114	95	19	30	41	15	69	26	11	33	14	35	34	13	7	3	19	0	35	40	11	16	11	13	15	6	0	26	9	2	19	17	7	14	15	3	37	35	13	46	27
ENSGALG00000049526	25	13	13	2	5	0	0	0	5	11	0	0	0	5	0	0	0	0	2	0	0	0	0	8	0	0	0	0	2	0	0	0	0	2	4	2	0	4	0	0	0	0	8	0	0
ENSGALG00000009405	113	158	118	4	17	25	0	2	2	9	8	14	0	2	0	0	0	2	0	4	6	3	1	14	0	0	8	0	3	12	3	5	0	10	95	1	0	3	1	8	79	45	3	8	0
ENSGALG00000009395	70	127	36	3	3	15	7	3	0	4	0	0	0	3	0	0	5	4	0	0	0	12	0	14	0	0	3	13	0	0	0	0	0	6	0	0	0	3	0	0	4	0	0	0	0
ENSGALG00000049032	1	2	1	0	0	0	0	0	0	1	0	0	0	0	0	0	0	0	0	0	0	0	0	0	0	0	0	0	0	0	1	0	0	1	0	0	0	0	0	0	0	0	0	0	0
ENSGALG00000027468	0	0	0	0	0	0	0	0	0	0	0	0	0	0	0	0	0	0	0	0	0	0	0	0	0	0	0	0	0	0	0	0	0	0	1	0	0	0	0	0	0	0	0	0	0
ENSGALG00000026253	392	488	865	304	397	919	86	238	227	738	842	712	50	132	122	781	892	858	127	168	104	530	704	1746	347	44	455	410	431	779	116	107	42	252	444	656	91	170	120	332	535	496	147	176	72
ENSGALG00000042411	1297	1793	619	1358	1523	1421	506	314	498	506	176	575	54	613	571	460	411	395	189	52	246	852	938	700	315	40	455	604	487	483	479	375	59	313	917	409	212	125	226	470	453	356	368	256	126
ENSGALG00000052557	6	43	17	29	21	18	9	32	26	7	52	21	9	25	31	21	79	5	0	23	0	7	21	26	10	0	0	69	39	13	0	5	0	29	8	29	7	0	24	89	34	0	0	6	0
ENSGALG00000009429	139	131	177	88	68	123	62	63	30	239	246	352	45	67	31	346	435	402	45	6	67	189	185	527	73	5	77	128	61	180	34	36	4	42	69	43	47	41	10	60	101	117	12	39	41
ENSGALG00000009451	279	286	324	282	187	279	105	109	277	274	163	187	30	287	84	365	67	307	28	2	39	85	258	343	83	2	230	355	189	77	52	82	11	325	363	181	128	100	87	168	280	217	115	46	0
ENSGALG00000009442	907	3568	4948	6781	5119	6235	7902	3618	1022	2298	2467	793	1272	1788	2178	2200	1765	368	641	208	1048	2038	596	662	342	401	1211	1814	1373	1756	671	810	555	1747	1505	1614	1175	1083	1006	2343	2199	547	1570	1104	1191
ENSGALG00000029721	35	42	157	128	125	159	65	96	73	18	108	40	49	12	11	26	110	25	9	10	34	71	77	110	17	10	13	54	19	43	4	4	26	24	36	32	12	25	18	71	36	39	14	24	11
ENSGALG00000025658	0	0	0	0	0	0	0	0	0	0	0	0	0	0	0	0	0	0	0	0	0	0	0	0	0	0	0	0	0	0	0	0	0	1	0	0	0	0	0	0	0	0	0	0	0
ENSGALG00000017644	12915	14398	21981	13223	11305	15856	3663	5019	4694	12327	14270	20364	4235	2454	2379	16310	15501	17239	1933	3136	2807	14151	9967	14716	3413	3930	5659	10070	15494	7714	3138	4835	3016	7734	11301	7304	1647	4988	2506	10786	12099	8364	4888	4938	1471
ENSGALG00000005651	946	1158	1387	698	724	961	532	465	438	913	988	1064	213	478	280	1017	922	1230	220	366	279	700	715	1267	288	130	527	895	876	983	262	477	202	704	670	984	178	360	337	740	883	730	307	364	251
ENSGALG00000005674	3109	4432	2527	2724	2406	3123	1864	1243	1573	1423	522	1223	478	1754	1354	1414	947	946	490	370	652	1320	993	1173	833	137	856	1109	1348	1135	744	1001	316	644	1003	973	785	847	625	1075	998	834	840	986	758
ENSGALG00000052114	361	444	196	286	322	501	94	254	179	325	157	149	220	171	78	351	271	267	102	33	75	426	304	311	69	169	151	318	223	335	104	104	193	127	211	240	48	98	85	216	187	60	80	82	50
ENSGALG00000005708	4	0	8	7	1	4	0	2	7	24	4	7	0	3	0	14	21	8	0	2	2	23	18	0	3	0	0	11	10	6	0	2	2	0	4	9	0	4	2	0	4	27	0	13	5
ENSGALG00000042522	291	342	284	226	191	257	181	118	114	376	164	189	44	92	44	184	136	114	39	10	33	161	159	171	79	6	62	182	119	132	49	47	11	55	104	184	43	60	38	136	124	149	56	76	30
ENSGALG00000039008	77	55	102	36	40	60	39	51	43	920	1149	209	171	46	30	727	675	676	67	149	95	935	390	233	122	120	127	551	425	414	141	111	19	550	290	379	67	104	91	640	495	433	106	116	86
ENSGALG00000036593	153	27	39	27	20	50	4	20	10	53	200	96	9	0	4	73	139	31	0	2	14	410	200	109	7	2	11	152	98	112	8	11	4	223	569	1034	3	4	11	129	3005	534	5	33	5
ENSGALG00000033322	183	103	233	110	106	112	136	145	155	300	194	399	84	156	179	248	194	198	165	508	186	241	93	105	312	65	212	156	145	126	123	187	67	113	104	130	233	160	146	189	237	188	311	280	184
ENSGALG00000047756	16	10	23	25	33	20	177	249	153	32	28	73	87	228	185	102	57	212	102	86	214	151	146	132	213	47	167	208	181	261	142	122	243	221	204	252	126	93	196	333	296	346	106	116	240
ENSGALG00000055047	0	0	22	0	0	0	0	0	0	0	0	0	0	0	0	0	0	0	0	0	0	0	0	14	0	0	0	0	0	11	0	0	0	0	0	0	0	0	0	0	0	0	0	0	0
ENSGALG00000054023	0	0	143	0	0	0	0	0	0	0	0	0	0	0	0	0	0	0	0	0	0	0	0	0	0	0	0	0	0	0	0	0	0	0	0	0	0	0	0	0	0	0	0	0	0
ENSGALG00000049343	38	39	19	16	5	7	2	3	4	3	4	1	2	4	1	26	6	3	9	1	0	2	21	15	4	1	4	1	111	5	0	36	1	5	6	1	18	5	2	8	32	6	10	14	3
ENSGALG00000050627	18	31	11	9	6	5	0	6	0	5	3	0	3	2	1	15	2	5	2	1	2	1	33	17	1	2	6	7	111	11	0	58	1	3	13	1	12	12	1	3	36	3	9	32	2
ENSGALG00000053425	59	64	135	50	55	104	63	53	59	96	51	88	38	43	36	66	60	77	37	46	45	60	55	54	47	57	39	49	48	57	39	27	79	36	30	113	25	24	38	65	58	67	25	39	31
ENSGALG00000049663	31	32	14	13	4	7	2	3	4	2	2	1	1	3	1	22	5	3	8	1	0	2	17	12	3	1	3	0	85	5	0	30	1	3	4	1	14	3	2	8	24	5	8	8	3
ENSGALG00000041225	3	3	0	0	0	0	0	0	0	0	0	0	0	0	0	0	0	0	0	0	0	0	0	0	0	0	0	0	0	0	0	0	0	0	0	0	0	0	0	0	0	0	0	0	0
ENSGALG00000041229	0	1	0	0	0	0	0	1	0	0	0	0	0	0	0	0	0	0	0	0	0	0	0	0	0	0	0	0	0	0	0	0	0	0	0	0	0	0	0	0	0	0	0	0	0
ENSGALG00000004975	307	407	549	230	288	255	153	177	181	514	592	737	151	167	71	511	336	446	77	109	111	334	285	340	134	188	77	266	377	353	129	109	142	217	206	334	61	99	104	331	156	208	91	115	63
ENSGALG00000049010	0	0	0	0	0	0	0	0	0	0	0	2	0	0	0	4	7	4	1	0	3	1	1	0	0	5	2	0	6	0	1	1	0	0	29	6	0	17	5	6	14	0	3	32	0
ENSGALG00000030810	1232	1260	1569	527	1097	1068	585	602	496	1146	672	1171	105	283	219	844	787	759	219	193	212	1178	934	1137	269	47	268	1049	766	639	191	290	71	999	915	1014	163	303	142	1520	1119	1198	218	261	210
ENSGALG00000037504	426	656	576	281	269	308	69	193	103	255	331	285	44	112	38	181	131	128	61	171	58	205	93	295	99	21	169	147	114	122	51	69	20	123	138	149	42	53	40	131	190	113	46	65	48
ENSGALG00000051201	19	23	20	6	18	25	0	0	0	47	59	27	7	9	5	16	8	7	0	7	5	10	2	7	3	0	8	14	3	7	7	0	0	0	5	3	3	3	0	0	3	8	0	0	0
ENSGALG00000005968	1221	1810	1830	1025	1213	1334	552	490	511	860	710	1075	609	391	246	866	561	994	156	365	207	665	452	958	322	148	315	416	498	413	204	191	312	238	328	564	135	197	226	487	376	511	333	168	175
ENSGALG00000051779	1195	1464	1759	578	833	823	187	269	289	671	574	939	156	231	116	403	345	467	79	125	157	259	305	466	163	109	172	322	336	276	142	140	110	155	227	275	82	113	106	277	228	286	167	198	141
ENSGALG00000031265	462	558	504	359	437	431	385	241	293	465	220	514	113	411	297	450	258	397	127	312	195	369	185	431	353	34	268	281	251	337	148	254	71	190	280	234	330	215	211	434	290	313	275	288	335
ENSGALG00000006326	1067	1187	2581	733	273	753	319	584	757	525	1138	1198	456	158	121	2360	922	1922	125	633	380	1589	1242	1260	242	292	25	2047	2204	1840	258	361	773	1635	2085	921	385	484	495	2146	1833	2534	500	39	206
ENSGALG00000006320	0	2	3	0	5	2	0	0	0	4	0	0	0	0	0	1	0	0	0	1	0	0	0	0	0	0	0	0	4	0	0	0	0	0	3	8	0	0	0	0	0	0	0	0	0
ENSGALG00000000112	81	115	144	1096	317	690	1210	996	776	3	29	12	142	180	119	6	9	2	169	80	105	0	0	0	203	101	143	0	0	0	97	51	76	0	0	0	24	28	51	0	0	0	15	43	37
ENSGALG00000004918	2	1	695	277	333	345	211	209	171	269	190	299	133	200	125	269	215	334	130	66	176	224	220	196	150	210	122	238	349	234	200	248	358	137	197	135	193	237	220	147	193	189	122	267	175
ENSGALG00000004948	44	45	43	30	53	58	96	52	54	278	99	223	145	69	24	371	321	240	60	53	63	234	138	191	76	77	54	104	160	169	55	33	32	134	195	187	48	103	39	194	111	235	79	63	77
ENSGALG00000004936	10	17	11	41	26	36	7	8	7	0	0	0	0	2	4	0	0	0	2	0	0	0	0	0	0	0	2	0	0	0	0	0	0	0	0	0	0	0	0	0	0	0	0	0	0
ENSGALG00000032770	229	177	202	98	65	51	24	30	22	264	115	252	9	60	41	262	211	322	34	43	25	196	276	242	136	29	54	176	131	144	46	83	25	43	32	111	46	64	26	46	66	161	62	73	78
ENSGALG00000043080	459	60	299	538	536	164	313	267	331	436	200	393	107	137	122	93	319	357	37	6	71	146	1102	1095	71	21	151	437	332	645	131	137	41	965	753	1096	162	116	240	397	416	418	160	95	74
ENSGALG00000003574	179	177	248	107	118	152	124	118	78	588	405	500	26	145	53	1131	614	534	121	147	119	920	703	983	212	22	162	748	555	490	178	174	47	549	721	743	129	209	176	842	875	753	232	262	176
ENSGALG00000003560	27	76	68	10	29	36	25	6	22	16	2	5	7	25	3	19	21	24	15	7	14	12	4	42	22	10	30	11	25	5	62	40	5	4	14	36	6	11	22	41	6	18	13	6	5
ENSGALG00000048700	276	364	580	326	320	409	417	269	319	306	271	281	279	238	242	392	334	240	92	96	183	354	355	556	163	130	162	262	216	430	165	173	350	227	316	345	200	179	236	215	193	258	133	214	172
ENSGALG00000048067	136	156	129	34	53	62	48	26	29	108	126	136	53	89	64	90	108	117	36	81	41	89	40	56	74	0	63	69	115	97	31	64	25	31	79	114	67	71	80	160	97	98	93	71	49
ENSGALG00000029858	10	3	9	5	6	12	59	53	66	4	0	14	258	73	89	5	8	9	49	60	110	9	2	10	72	38	89	17	0	6	60	34	67	0	0	13	141	54	133	0	6	5	97	67	58
ENSGALG00000003396	3119	3369	1616	1720	1656	2407	1405	837	840	2335	448	1460	242	2455	1891	1518	1037	847	531	98	569	1477	1283	1080	871	261	956	1036	1252	1254	621	670	179	894	1260	837	543	904	750	923	1096	873	375	454	291
ENSGALG00000034179	637	716	436	289	200	389	109	170	62	447	107	378	20	137	120	513	249	316	103	5	32	542	319	308	155	24	136	415	360	300	129	107	11	205	415	167	24	93	63	135	336	189	42	73	15
ENSGALG00000003433	129	139	103	17	52	32	36	29	21	935	663	812	18	33	26	372	735	345	38	38	40	370	138	343	90	4	44	245	116	296	57	18	10	98	277	307	34	175	98	150	101	455	98	91	90
ENSGALG00000047507	1	0	0	0	0	4	0	0	0	0	0	0	0	0	0	0	0	0	0	0	0	3	7	0	0	0	0	0	0	0	0	0	0	0	0	0	0	0	0	0	0	0	0	0	0
ENSGALG00000003425	0	3	0	0	4	0	0	0	5	0	0	0	0	0	3	3	0	0	0	0	0	0	0	0	0	0	0	0	0	0	0	0	0	0	0	0	0	0	0	0	0	0	0	0	0
ENSGALG00000030543	10	44	21	67	27	74	91	30	56	727	468	1078	76	26	22	2701	1290	1915	21	25	30	1611	1083	1157	32	41	106	1885	1779	1927	46	65	39	1341	1753	1180	38	52	61	1309	1614	1673	40	51	41
ENSGALG00000030028	165	162	428	716	410	293	430	369	387	230	224	287	744	435	328	198	151	257	315	771	388	189	83	72	398	1020	464	85	153	149	502	875	986	92	48	58	371	263	722	119	49	125	560	451	292
ENSGALG00000027794	0	0	0	0	0	0	0	0	0	0	0	0	0	0	0	0	0	0	1	0	0	0	0	0	0	0	0	0	0	0	0	0	0	0	0	0	0	1	2	0	0	0	0	0	0
ENSGALG00000006307	139	140	225	60	87	111	47	73	79	86	57	94	15	77	58	78	35	82	30	72	43	53	61	83	58	5	55	49	56	71	34	41	14	37	39	32	35	34	22	48	53	42	32	36	34
ENSGALG00000004578	121	133	69	81	70	139	76	85	61	266	93	117	7	101	54	198	138	138	35	18	60	194	165	136	56	10	77	139	208	99	29	61	5	110	124	134	81	99	83	152	127	148	52	162	78
ENSGALG00000004587	342	488	403	516	530	501	334	354	290	802	882	297	165	451	698	388	178	356	270	755	219	351	411	489	216	99	305	205	431	251	353	457	114	181	374	166	288	346	261	327	282	371	229	232	318
ENSGALG00000004591	47	55	1000	71	54	77	8	30	33	368	70	54	93	5	3	169	51	15	18	48	14	63	1488	90	28	15	35	61	846	126	24	16	15	22	63	19	9	29	15	12	31	44	17	25	22
ENSGALG00000004597	1011	1012	362	971	955	1203	710	596	544	593	103	345	316	942	436	533	239	343	474	97	335	577	741	560	554	224	536	373	638	686	330	827	176	276	747	298	615	975	736	296	205	253	339	727	238
ENSGALG00000024984	12	19	16	2	3	5	3	4	1	7	3	6	2	1	2	8	5	3	2	2	3	10	6	11	4	3	3	4	2	3	2	1	3	1	3	5	2	1	2	1	4	6	2	2	2
ENSGALG00000047479	301	529	582	253	444	418	99	225	151	361	334	381	231	152	59	290	306	396	79	98	64	364	240	382	113	31	118	208	247	332	71	62	55	141	131	153	45	74	67	229	178	193	88	84	65
ENSGALG00000006122	151	180	267	83	92	137	82	71	110	113	87	117	37	34	25	124	72	161	17	26	36	146	94	77	17	20	20	69	62	70	33	19	42	43	40	46	0	28	31	84	57	56	15	15	13
ENSGALG00000006117	248	316	335	166	195	261	155	231	167	201	197	296	443	273	136	229	174	202	513	615	404	198	180	250	690	191	611	141	194	223	301	496	317	161	279	249	781	865	1071	192	185	221	647	971	602
ENSGALG00000006301	42	26	76	30	62	57	27	24	37	23	34	40	24	7	3	30	32	25	7	18	36	30	49	58	12	8	16	55	33	40	15	23	43	27	37	60	25	37	24	18	45	37	33	26	38
ENSGALG00000047475	5	4	5	12	14	11	24	30	31	3	0	0	8	0	3	4	0	3	31	18	22	5	7	0	40	43	39	0	15	0	37	20	31	0	5	0	22	19	18	8	0	5	13	30	10
ENSGALG00000006286	651	552	517	343	528	512	415	513	427	392	132	236	222	285	226	418	156	196	182	130	197	316	407	405	269	160	384	329	380	345	216	310	170	115	337	214	197	266	258	214	210	200	158	341	222
ENSGALG00000006270	107	72	128	63	93	104	91	122	73	27	11	31	103	49	27	35	47	24	66	24	74	51	47	34	62	31	70	11	21	17	72	62	59	18	43	21	40	65	57	49	40	36	24	60	58
ENSGALG00000026359	1138	1469	887	749	750	967	352	367	298	375	144	341	191	128	130	368	155	179	155	28	133	346	331	356	98	107	203	161	328	205	157	142	38	110	145	176	81	78	58	163	101	159	91	141	79
ENSGALG00000004228	82	112	105	23	73	103	17	47	31	222	72	55	10	45	38	78	40	48	29	0	34	74	82	90	34	0	25	47	62	20	11	23	2	8	83	6	19	50	0	0	28	34	0	10	7
ENSGALG00000009887	680	619	667	435	425	630	400	279	309	644	379	584	217	304	232	856	409	497	179	170	198	606	322	607	256	46	278	732	567	662	187	217	107	572	931	521	165	244	185	947	884	790	192	137	127
ENSGALG00000053358	0	3	19	0	0	0	0	0	0	0	0	0	0	0	0	0	0	3	0	0	0	0	7	0	0	0	0	0	0	0	0	0	0	0	0	0	0	0	0	0	0	0	0	0	0
ENSGALG00000004196	5	7	193	6	9	11	5	0	21	158	4	16	16	0	0	74	13	4	0	0	0	151	195	6	0	0	0	12	192	28	0	8	6	4	12	0	3	4	4	3	6	4	0	0	5
ENSGALG00000009896	615	819	553	373	320	495	125	260	233	1477	594	963	254	279	159	1237	764	756	229	113	177	1093	730	905	252	73	281	790	676	796	166	238	64	670	834	591	138	329	285	709	812	695	164	352	132
ENSGALG00000052743	830	1310	1859	390	407	793	443	101	259	1166	1486	1183	98	83	52	1287	1466	1139	23	47	81	1098	826	1112	47	34	66	717	1027	515	79	118	177	1041	1842	1981	36	330	90	1467	1756	866	259	270	128
ENSGALG00000048103	157	156	491	292	364	318	165	239	212	153	207	106	138	92	60	145	249	80	55	42	139	290	293	304	52	30	51	215	127	253	59	90	185	158	221	269	156	147	196	220	139	143	110	169	156
ENSGALG00000009911	630	579	487	445	536	621	242	247	264	546	134	265	43	292	150	465	353	228	214	21	81	324	308	409	212	11	261	216	259	289	172	126	13	155	185	113	87	127	137	173	96	126	82	157	102
ENSGALG00000051006	97	95	71	69	67	152	27	20	35	15	0	0	7	48	25	2	10	8	0	0	3	9	15	24	9	2	14	7	18	24	0	3	6	5	8	3	0	0	0	16	19	19	5	6	0
ENSGALG00000004274	677	1498	1924	157	360	258	14	49	57	1135	1202	2771	84	53	57	892	454	1767	81	32	51	674	1471	1044	46	16	61	3573	3787	2329	47	58	30	1533	2319	1155	6	14	14	5846	6373	2615	33	35	12
ENSGALG00000004272	208	277	122	221	135	227	98	68	94	297	93	281	194	211	134	214	134	154	234	82	269	255	204	176	268	319	329	346	322	418	298	447	361	252	309	181	693	515	493	326	232	255	457	463	453
ENSGALG00000054460	10	27	29	4	24	13	0	19	12	40	85	51	19	2	13	73	55	54	2	11	16	132	41	49	15	6	11	26	39	36	7	18	0	21	30	78	15	6	9	28	7	51	15	22	3
ENSGALG00000025884	815	778	944	247	370	495	247	435	277	721	330	745	507	602	823	310	253	314	160	126	363	310	375	397	231	106	172	351	711	495	239	597	315	324	500	618	460	436	336	253	548	264	518	448	541
ENSGALG00000022926	2000	2178	2213	1364	1399	1623	459	463	509	1175	1536	2413	574	361	199	1976	1038	2436	263	362	294	1803	1133	1463	213	224	333	1479	1518	3298	338	341	474	982	1282	1837	165	222	232	1291	1275	1412	328	201	160
ENSGALG00000014477	10	23	29	18	7	33	6	0	0	23	9	24	0	0	8	96	47	96	9	15	26	65	48	93	21	4	43	27	64	22	15	14	0	18	63	0	16	11	21	14	85	8	38	30	6
ENSGALG00000034438	28	11	79	53	63	69	21	6	20	28	21	48	18	50	10	94	25	60	18	2	3	39	22	72	4	0	20	56	3	2	16	6	2	11	11	19	10	14	2	37	21	11	4	2	2
ENSGALG00000014490	198	217	414	276	493	488	98	112	83	136	189	185	83	52	36	102	118	119	21	12	26	144	95	166	43	8	30	100	33	95	28	17	22	27	63	70	10	14	24	72	36	40	17	8	11
ENSGALG00000014525	571	871	986	718	370	527	192	249	218	345	106	280	456	89	80	133	100	389	27	0	43	394	159	367	130	1	122	223	125	330	88	67	41	114	271	340	76	43	50	297	187	245	188	102	42
ENSGALG00000014513	515	622	1270	181	292	239	94	165	310	326	262	424	68	44	76	15	36	19	0	7	14	28	54	62	17	18	21	17	17	9	8	17	27	29	24	16	7	18	13	13	5	0	14	19	0
ENSGALG00000007513	1545	1851	2240	1361	1303	1471	1471	1832	1361	1854	2422	3266	1889	1130	765	3570	2120	3324	781	1489	942	3710	2396	3294	1364	520	1423	1844	2150	1970	560	757	651	2831	2418	3271	680	748	840	4477	3168	3832	919	914	706
ENSGALG00000014526	7035	9076	11079	3659	2503	1976	63491	52559	52485	4860	400	207	256489	157085	104449	6396	1051	824	134218	6648	156389	624	147	4383	128063	200154	169669	517	716	4374	20740	17130	34171	3157	3041	3203	12119	79147	149767	95	6214	3520	11042	9758	9247
ENSGALG00000030419	123	149	119	33	60	64	50	35	18	275	145	273	54	278	214	364	156	165	349	379	485	161	201	166	676	118	308	271	233	206	360	660	174	137	182	135	621	609	369	150	164	171	289	287	416
ENSGALG00000007527	237	283	275	152	282	434	55	107	33	223	68	183	68	88	70	261	202	127	55	4	57	227	350	311	103	20	129	145	223	259	68	93	23	257	416	393	100	117	50	167	251	264	55	91	81
ENSGALG00000033087	0	0	4	0	0	0	0	0	0	17	7	18	0	0	0	13	3	22	2	8	1	32	13	22	2	3	5	13	26	6	8	2	0	6	21	26	0	3	7	8	36	14	11	33	3
ENSGALG00000007651	1023	1261	1424	740	837	1027	572	633	563	6491	4506	5395	996	1066	672	4208	4429	5173	668	471	961	3351	1834	2813	1131	376	1264	2333	2367	1852	909	951	459	1732	2402	1508	558	1172	811	2308	3219	2619	925	1630	1194
ENSGALG00000007712	600	645	411	203	365	315	245	252	207	418	75	289	32	165	70	208	90	238	38	14	18	241	438	299	141	18	171	204	379	338	105	150	24	206	515	251	52	92	117	110	164	343	55	52	44
ENSGALG00000050004	10	8	17	0	6	4	0	4	4	3	0	5	2	0	0	0	0	9	0	0	8	0	0	0	6	0	0	0	2	4	6	2	0	9	5	0	0	0	2	0	0	2	0	0	0
ENSGALG00000054293	3	0	5	0	0	0	0	0	0	0	0	0	0	0	0	0	0	0	0	0	0	0	0	0	0	0	0	0	0	0	0	0	0	0	0	0	0	0	0	0	0	0	0	0	0
ENSGALG00000054291	0	0	0	0	0	0	0	0	0	0	0	0	0	0	0	0	0	0	0	0	0	1	0	0	0	0	0	0	0	0	0	0	0	0	0	0	0	0	0	0	0	0	0	0	0
ENSGALG00000054290	0	0	0	0	0	0	0	0	0	0	0	0	0	0	0	0	0	0	0	0	0	0	0	0	0	0	0	0	0	0	0	0	0	5	2	0	0	0	0	0	0	0	0	0	0
ENSGALG00000054299	4	0	0	0	0	0	0	0	0	0	0	0	0	0	0	0	0	0	0	0	0	0	0	0	0	0	0	0	0	0	0	0	0	0	0	0	0	0	0	0	0	0	0	0	0
ENSGALG00000050996	0	0	1	0	0	0	0	0	0	0	0	0	0	0	0	0	0	0	0	0	0	0	0	0	0	0	0	0	0	0	0	0	0	0	0	0	0	0	0	0	0	0	0	0	0
ENSGALG00000050997	0	0	0	0	0	0	0	0	0	0	0	0	0	0	0	0	0	0	0	0	0	0	0	0	0	0	0	0	0	0	0	0	0	7	2	0	0	0	0	0	0	0	0	0	0
ENSGALG00000050990	0	3	3	0	0	5	0	0	0	0	0	0	0	0	0	0	0	0	0	0	0	0	0	0	0	0	0	0	0	0	0	2	0	0	0	0	0	0	0	0	0	0	0	0	0
ENSGALG00000050993	0	0	0	0	0	0	5	0	0	5	5	13	0	0	0	8	5	8	0	2	0	6	3	5	0	0	0	0	8	2	0	0	0	5	7	0	0	4	2	0	2	7	0	6	4
ENSGALG00000011681	173	222	277	99	91	139	72	102	77	57	9	56	7	32	10	6	11	5	8	0	2	3	17	6	12	0	22	7	9	0	10	2	0	0	0	8	0	0	12	0	0	12	11	0	0
ENSGALG00000011688	1161	1377	1329	551	825	832	348	317	334	769	885	633	110	714	285	987	590	901	279	435	411	1097	1163	1191	503	78	507	997	1231	1447	297	555	101	989	1529	1090	330	548	355	1547	1530	1192	497	455	370
ENSGALG00000031105	151	135	227	139	184	237	160	49	119	546	112	85	13	52	68	27	94	8	38	39	47	5	0	0	71	3	47	67	9	11	45	46	29	4	8	3	23	72	10	0	0	0	44	22	19
ENSGALG00000012030	2561	639	1868	1674	1468	574	1406	1018	1185	2535	732	1723	226	1837	1169	2452	1353	1331	951	907	718	1670	1312	1518	1117	239	1468	1070	1582	1506	946	241	330	1100	1982	1318	850	1505	1104	1209	1330	1169	687	1328	712
ENSGALG00000012020	202	178	143	16	24	26	11	9	9	17	0	0	4	8	4	0	4	0	0	2	0	0	0	11	6	4	2	0	0	9	2	0	0	0	2	4	2	2	2	0	0	0	0	6	0
ENSGALG00000038775	73	138	16	24	72	51	31	36	20	1644	219	959	54	37	34	1189	692	224	23	33	19	866	915	131	6	0	24	560	227	489	6	13	7	542	1070	306	0	10	2	630	874	685	3	0	6
ENSGALG00000011695	8183	8184	7680	7706	7998	9650	8508	9576	7117	2961	2213	2312	2424	9909	6959	4394	2499	2460	3748	4859	2766	3709	2664	3676	6867	866	4409	2511	2105	2719	2548	2889	720	2212	2677	2584	1956	4169	2735	3407	3396	3179	2436	3434	2955
ENSGALG00000050800	0	0	1	0	0	0	0	0	0	0	0	0	0	0	0	1	0	0	0	0	0	0	0	0	0	0	0	0	0	0	0	0	0	1	1	0	0	0	1	0	0	0	0	0	0
ENSGALG00000011685	740	765	1070	525	632	611	511	411	493	737	623	726	198	182	153	465	410	439	121	258	218	521	458	742	288	30	330	481	245	358	179	152	69	331	453	442	217	163	193	498	432	363	247	208	119
ENSGALG00000030266	0	4	4	3	8	2	0	0	3	2	0	0	12	0	0	0	3	3	0	22	10	5	0	0	12	0	13	5	0	0	0	8	6	1	0	2	4	9	6	13	0	0	14	10	5
ENSGALG00000010929	103	120	109	90	103	126	85	70	85	82	91	75	34	81	36	111	77	91	36	10	28	135	100	94	33	6	57	123	105	100	13	24	0	64	75	57	36	43	1	80	88	68	36	37	4
ENSGALG00000010932	213	295	300	223	209	313	308	241	229	368	544	348	183	239	165	371	386	493	82	147	173	479	452	596	179	106	200	504	353	464	136	183	216	242	204	289	128	126	179	389	332	540	245	250	323
ENSGALG00000051967	2	2	15	5	6	8	7	5	0	9	13	6	0	2	0	16	10	25	0	0	4	19	19	24	6	0	5	9	9	12	4	2	2	0	3	5	6	3	0	0	4	4	4	0	8
ENSGALG00000043675	202	3	105	89	247	5	81	0	35	0	10	2	84	61	0	246	39	43	0	2	1	202	87	75	0	0	3	133	37	28	70	63	0	4	34	0	9	5	0	70	108	0	0	0	0
ENSGALG00000051314	0	0	3	0	0	0	0	0	0	3	0	3	0	0	0	11	4	4	0	0	4	6	1	4	2	0	0	2	3	4	0	0	0	5	0	0	0	0	0	0	0	10	0	1	0
ENSGALG00000038372	2	36	78	26	52	33	67	59	83	7	73	4	53	7	0	105	159	19	5	81	27	37	9	191	19	0	24	37	0	11	17	0	23	36	21	65	26	51	47	5	15	7	32	44	0
ENSGALG00000035052	75	128	69	96	109	139	12	19	11	0	0	7	2	9	7	0	0	0	4	0	11	5	0	0	43	2	5	0	0	0	8	0	7	0	0	0	32	5	11	0	0	0	37	22	8
ENSGALG00000010903	187	249	155	485	518	88	96	271	146	191	379	321	63	173	28	53	535	313	87	153	67	473	198	380	190	17	178	154	285	114	27	152	30	231	170	169	36	73	58	244	153	153	132	76	72
ENSGALG00000010921	428	460	396	297	541	527	151	171	104	1354	716	1028	116	105	48	1191	550	442	150	25	129	646	518	787	135	35	249	455	502	338	110	101	12	213	744	419	24	131	62	928	560	724	270	105	30
ENSGALG00000048954	18	9	20	8	32	48	4	17	3	40	14	57	11	35	4	4	12	12	33	4	11	7	0	0	0	21	13	4	20	0	23	246	223	10	14	3	37	28	53	0	7	21	167	50	64
ENSGALG00000030902	1591	2174	1449	736	803	1148	235	202	216	2347	2329	3878	103	339	165	3826	3326	1789	135	132	91	3996	1607	2913	209	59	363	800	1126	662	139	207	53	1290	1609	1488	97	67	50	1348	2094	1377	173	112	45
ENSGALG00000015234	0	0	0	4	0	0	0	0	0	30	10	24	0	0	0	0	9	0	0	0	0	5	0	0	0	0	4	0	0	0	0	0	0	0	0	3	0	0	0	0	0	0	0	0	0
ENSGALG00000039536	12	9	190	308	146	227	12052	3677	6469	160	208	131	114	3619	1346	1082	696	496	14	20	11	2013	812	315	16	0	2	185	174	214	4	8	0	677	296	324	15	16	11	386	718	396	3	5	8
ENSGALG00000053658	3	2	0	4	0	4	2	4	0	0	0	0	0	0	4	0	6	0	0	0	0	0	0	4	0	0	0	2	0	0	0	0	0	0	0	0	0	0	0	0	2	0	0	0	0
ENSGALG00000042469	733	590	669	162	266	381	167	234	174	579	251	337	47	106	106	299	192	246	62	42	63	198	254	268	131	17	100	134	109	139	38	61	20	59	164	62	18	53	31	68	92	115	56	64	53
ENSGALG00000040180	2	3	75	150	165	141	378	527	173	47	355	64	3189	70	12	154	872	70	44	71	162	1176	387	703	26	27	23	704	59	525	50	26	577	1279	1288	3432	381	909	1879	1640	1958	887	267	657	399
ENSGALG00000028133	1324	1738	2064	1179	1188	1349	1051	1111	1338	1551	1414	1921	391	1497	1245	1296	1066	992	829	1273	1193	1222	924	1435	1824	197	1345	1064	1316	1155	979	1464	389	1573	1333	1994	2438	2243	2175	2220	2048	1622	3292	3307	3572
ENSGALG00000012915	2232	2474	2011	581	703	842	333	434	621	848	297	851	173	279	344	194	149	203	65	45	101	153	194	182	138	39	96	80	146	47	128	151	34	66	78	59	48	96	39	43	102	49	88	93	121
ENSGALG00000031035	736	970	656	878	1018	1046	1699	95	1086	175	4813	3764	353	5941	2584	10090	4907	279	2166	2564	2186	7530	4332	7463	74	615	3832	2953	2116	2896	976	1953	560	3170	2557	2148	2204	3230	1674	3811	2799	3159	1556	1655	2320
ENSGALG00000047942	0	0	0	0	0	0	0	0	0	0	0	0	0	0	0	0	0	0	0	0	0	0	0	0	0	0	0	0	0	0	0	0	0	0	0	0	0	0	0	0	0	2	0	0	0
ENSGALG00000051086	0	0	2	0	0	2	0	0	3	24	5	23	0	0	0	14	0	4	7	0	8	22	36	0	0	0	2	15	0	0	8	0	0	5	5	2	3	0	7	0	9	1	0	8	0
ENSGALG00000027868	7	13	2	1	2	4	5	6	0	33	0	9	0	2	5	14	22	5	6	0	5	6	37	14	9	0	11	15	3	0	5	6	3	0	0	3	5	5	18	10	2	2	10	6	2
ENSGALG00000035031	1714	2321	2645	3230	3738	2853	1361	1523	1128	711	328	542	431	493	588	931	676	758	506	220	409	1063	891	972	567	318	614	764	1170	1006	533	834	645	1163	726	1426	504	228	504	847	853	628	500	420	306
ENSGALG00000036749	766	993	1375	745	592	770	228	268	435	1993	2042	2742	501	254	321	1109	946	1172	150	548	334	905	939	1051	412	200	334	1065	1513	1187	209	364	282	795	889	874	334	308	437	1012	979	1023	456	357	296
ENSGALG00000035932	36	27	7	10	17	46	0	2	3	16	3	4	0	0	0	10	4	1	0	0	2	0	3	0	12	0	0	0	8	5	0	1	0	6	0	7	9	4	0	0	0	5	0	0	4
ENSGALG00000017104	560	578	698	137	173	188	90	110	129	236	265	334	47	109	65	334	317	235	71	90	87	395	209	477	95	7	43	149	155	154	65	75	14	122	162	185	35	61	71	190	198	237	81	46	36
ENSGALG00000017105	137	1541	1756	728	1029	106	561	616	517	37	700	839	115	578	398	1086	560	505	470	138	311	684	682	999	516	98	464	566	567	410	450	567	112	452	585	594	356	428	359	642	767	729	354	476	268
ENSGALG00000043035	18974	26083	32415	61466	58655	68613	2555	2722	2788	1089	466	1165	427	1144	274	502	401	428	162	148	144	463	687	772	153	166	168	1325	942	995	208	199	211	540	754	675	73	141	129	1535	641	436	277	143	228
ENSGALG00000017111	817	933	1091	652	546	491	384	467	460	503	359	497	168	369	232	587	396	345	213	253	240	569	406	496	253	58	237	434	308	430	199	263	78	302	305	368	191	210	179	556	371	380	255	227	225
ENSGALG00000037164	6898	5627	4833	2045	2400	2566	1007	1202	1019	3135	1558	3187	280	1214	781	3676	2194	2983	541	446	440	3084	2557	3348	906	226	1057	1891	2132	2226	904	496	133	1697	2239	1347	270	606	376	2616	2186	2447	317	652	224
ENSGALG00000017112	975	63	859	469	697	581	360	355	395	999	779	872	111	574	321	1013	583	685	235	249	204	879	48	1001	324	45	322	591	964	557	294	443	78	689	1020	697	234	468	151	870	616	887	343	254	298
ENSGALG00000051780	112	143	84	45	57	40	0	10	13	17	11	42	0	27	3	44	29	25	0	3	0	46	40	30	3	0	6	83	70	26	9	8	0	22	46	18	3	5	0	84	56	44	0	3	7
ENSGALG00000053740	0	0	0	0	0	0	0	0	0	0	0	0	0	0	0	0	0	0	0	0	0	0	0	0	0	0	0	0	0	0	0	0	0	7	0	10	0	3	0	0	0	0	0	0	0
ENSGALG00000027886	1300	1325	1819	841	1162	1219	584	742	763	1389	922	1641	510	554	378	1774	1149	1132	237	403	360	1396	1189	1831	462	226	505	1769	1336	1261	425	595	296	1118	936	1506	398	439	470	1429	1456	1392	453	372	315
ENSGALG00000053743	4	5	9	0	0	10	2	6	2	4	2	6	10	11	0	3	0	2	8	0	8	3	2	19	0	2	19	4	6	9	12	6	15	0	0	0	14	9	7	0	3	6	18	6	14
ENSGALG00000053744	0	0	0	0	0	0	0	0	0	11	0	4	0	0	0	4	0	0	0	0	0	0	0	0	0	0	0	0	0	0	0	0	0	0	0	0	0	0	9	0	0	0	0	0	0
ENSGALG00000013793	101	101	111	102	111	134	151	143	102	318	103	203	23	224	175	181	176	178	169	88	133	297	279	266	110	29	173	215	333	276	123	265	47	243	361	241	230	402	198	275	269	254	112	266	203
ENSGALG00000013907	541	632	600	589	741	768	709	849	891	854	596	1252	183	384	314	980	863	1836	213	154	135	862	1026	1691	472	205	620	1177	1430	1113	508	458	180	599	549	534	205	197	232	758	623	591	329	222	225
ENSGALG00000039354	5	0	17	5	10	3	0	0	0	11	0	9	0	0	4	5	5	3	0	0	0	13	21	17	0	7	5	1	4	2	0	0	0	37	6	30	5	13	4	32	88	132	34	34	42
ENSGALG00000017064	824	948	935	249	302	373	104	280	286	475	208	453	64	182	94	127	99	224	71	67	80	150	156	161	84	22	98	65	82	117	28	33	11	46	52	45	39	37	15	107	147	48	114	90	50
ENSGALG00000013764	572	611	724	333	416	503	168	193	150	375	196	212	48	202	142	278	343	212	114	24	85	207	184	357	240	15	214	155	162	168	63	96	16	66	153	90	29	123	49	136	91	170	74	68	45
ENSGALG00000008890	134	138	70	290	226	362	295	240	231	461	86	532	39	131	120	529	823	559	161	27	68	889	1019	1366	217	42	356	600	786	756	178	281	67	517	621	480	240	201	400	422	564	430	275	167	167
ENSGALG00000017070	2489	2768	3695	1227	1273	1199	686	438	1231	481	516	634	123	300	600	1274	358	691	209	1031	203	972	287	987	214	66	432	327	437	291	190	425	101	541	522	373	197	323	276	968	785	306	407	204	294
ENSGALG00000042339	7	6	12	12	11	10	15	4	5	21	5	24	0	1	0	29	30	33	6	0	0	30	28	22	10	0	14	37	36	21	11	9	3	8	21	17	5	13	8	21	8	18	6	0	2
ENSGALG00000017065	2655	3319	1469	1176	1260	1795	865	738	852	2787	439	1550	190	361	355	2541	1570	420	244	37	129	2776	2466	1371	280	73	398	2538	2557	2636	291	249	27	1570	3245	1288	125	249	249	2227	2607	1564	136	124	130
ENSGALG00000032610	488	572	718	927	716	766	758	549	545	611	1338	1091	439	251	142	1362	1578	962	106	282	219	1557	2088	2303	265	220	225	1556	979	2489	278	228	538	1488	1337	2050	190	284	360	2026	1355	1507	260	260	209
ENSGALG00000008902	17	17	19	34	31	22	51	35	49	31	15	23	3	36	7	5	22	2	8	12	14	29	20	21	11	0	11	24	12	22	45	45	23	22	16	12	88	177	68	16	24	6	392	270	455
ENSGALG00000008847	233	258	168	165	157	189	84	82	62	177	99	117	15	63	46	140	129	146	25	10	29	123	120	101	50	11	55	135	134	102	71	41	10	61	125	79	44	70	47	77	67	79	37	78	27
ENSGALG00000030003	1141	1147	1942	384	434	462	283	322	425	923	654	1372	414	210	304	1241	811	1079	236	317	244	691	591	931	357	403	241	784	813	792	574	479	840	564	600	788	231	314	287	687	780	638	385	325	342
ENSGALG00000027519	0	0	0	0	0	0	0	0	0	0	0	0	0	2	0	1	0	0	1	0	0	0	0	0	3	0	0	0	0	0	0	0	0	0	0	0	0	0	0	0	0	0	0	0	0
ENSGALG00000046710	0	0	0	0	0	0	5	0	0	3	35	3	0	2	5	2	0	2	0	0	0	0	0	0	0	0	2	0	0	0	0	0	0	0	0	0	0	0	0	0	0	0	0	2	0
ENSGALG00000034289	210	318	452	113	143	167	302	585	352	423	1002	474	616	394	124	275	147	309	168	106	159	281	156	257	242	90	136	209	294	209	62	58	106	193	222	263	22	86	22	229	253	122	54	160	114
ENSGALG00000006056	408	629	819	333	339	328	115	143	131	497	567	632	229	68	83	545	257	529	78	115	86	330	316	295	107	63	92	469	546	467	100	131	88	363	311	360	73	88	84	735	512	425	101	87	47
ENSGALG00000006047	58	186	592	612	42	604	885	1058	732	189	94	155	699	172	91	196	624	197	67	468	568	1812	1006	1010	138	74	110	1410	158	174	99	78	804	64	841	98	80	563	80	110	104	812	319	587	875
ENSGALG00000052886	0	0	0	0	0	0	0	0	0	0	0	0	0	0	0	0	0	0	0	0	0	0	0	0	0	0	0	0	0	0	0	0	0	4	0	0	0	2	0	0	0	0	0	0	0
ENSGALG00000006097	4697	6833	3106	2000	2868	3242	876	971	1099	2092	342	1136	388	689	468	2756	1784	1104	383	38	357	1728	3252	2439	528	144	580	1921	2210	2278	477	651	298	896	3261	1571	169	311	373	2059	2345	1312	177	346	270
ENSGALG00000051457	4	7	8	0	5	2	2	0	0	57	0	106	0	0	5	0	119	67	0	0	0	0	0	175	2	0	7	0	13	0	0	0	0	32	54	64	0	2	8	41	63	29	0	0	0
ENSGALG00000029632	336	478	270	132	187	167	39	56	75	893	438	912	72	32	31	1070	935	958	40	2	14	1845	3	1589	24	8	59	790	1078	1	33	38	12	1	1123	733	18	64	44	849	717	681	35	54	22
ENSGALG00000039363	1713	2268	2468	1382	1371	1450	1817	2162	1810	1585	910	1614	946	1218	794	1327	856	906	582	528	643	1129	751	1051	1135	209	924	1096	884	772	436	797	159	439	726	719	558	535	452	745	1027	772	735	600	869
ENSGALG00000048626	0	0	0	0	0	0	2	0	0	0	0	0	0	0	0	0	0	0	0	0	0	0	0	0	0	0	0	0	0	0	0	0	0	0	0	0	0	3	0	0	0	0	0	0	0
ENSGALG00000048622	0	0	0	0	0	0	0	0	0	0	0	4	0	0	0	0	0	0	0	0	0	0	0	0	0	0	0	0	0	0	6	0	0	6	0	0	0	0	0	0	0	0	0	0	0
ENSGALG00000029796	67	31	97	10	16	7	10	28	0	70	88	34	9	3	4	18	20	10	17	52	5	32	6	9	48	0	2	22	5	0	12	7	2	2	5	9	8	8	0	8	22	5	6	8	11
ENSGALG00000009435	1336	1391	716	10018	7746	8525	10899	5520	7104	6	0	85	2464	20908	13863	4	248	16	6292	12509	5496	0	0	0	12561	1845	10369	0	0	0	6663	7788	1738	3	3	0	6588	8328	4161	2	0	0	5474	7698	5330
ENSGALG00000009440	1435	1608	1542	566	128	679	326	355	264	928	856	811	81	260	159	1996	952	631	163	205	135	1736	1177	1990	324	33	367	1132	775	1180	271	232	57	1713	9	1883	163	244	278	1628	1674	1688	210	248	170
ENSGALG00000009443	1094	1112	472	515	592	654	249	258	333	771	203	461	107	383	258	467	432	335	133	39	139	367	427	355	283	92	237	393	431	362	151	252	39	214	427	120	121	249	146	216	241	180	118	167	60
ENSGALG00000026838	2851	3523	2742	2137	2956	2677	2184	2976	2160	6453	3317	5074	420	785	928	7868	4677	4004	893	608	582	6558	4211	6640	1628	153	2087	5078	3896	3488	974	1071	224	3329	3966	2815	618	729	1127	3681	3853	3021	1088	1065	485
ENSGALG00000009424	1109	1123	1135	410	500	570	168	251	209	613	138	210	58	150	83	90	71	57	83	31	34	88	19	27	92	11	44	83	35	46	62	42	12	66	41	35	30	25	41	99	41	30	17	28	17
ENSGALG00000052846	2	1	2	1	0	0	0	0	0	0	0	1	0	0	0	0	0	0	0	1	0	0	0	0	1	0	1	0	1	0	0	0	0	0	0	0	0	0	0	0	0	0	0	0	0
ENSGALG00000053114	13	0	20	0	0	0	0	0	0	6	0	0	0	0	2	0	0	0	0	0	0	0	0	0	0	0	0	0	0	0	0	0	0	0	0	0	0	0	0	0	0	0	0	6	0
ENSGALG00000048620	0	0	5	0	0	0	0	0	0	2	0	6	0	0	0	7	0	2	0	0	2	0	0	4	2	0	2	0	4	4	0	0	0	0	4	0	2	0	0	0	0	0	0	0	0
ENSGALG00000009446	93	86	170	495	476	683	529	731	887	24	0	38	221	874	610	3	115	14	817	1667	942	25	12	6	1872	120	1882	15	11	20	874	1511	351	2	2	12	1475	1028	1189	35	16	6	1508	1314	1235
ENSGALG00000009448	1166	1327	1728	843	1030	1122	615	861	578	2843	2667	3320	853	2659	1019	9585	4478	3430	607	988	738	7636	4374	6090	913	243	703	5032	5208	4004	2099	3149	786	4750	4209	5520	1078	1249	942	6056	11559	6198	1783	1909	1583
ENSGALG00000038946	32	50	17	27	43	47	473	445	109	30	11	14	551	398	89	12	131	21	235	114	516	17	13	7	534	154	143	15	12	13	43	75	108	0	5	0	519	393	252	8	0	15	97	86	263
ENSGALG00000052909	0	0	0	0	0	0	0	0	0	0	0	0	0	0	0	0	9	0	0	0	0	0	0	0	0	0	0	0	0	0	0	0	0	0	0	0	10	0	0	0	0	0	0	0	0
ENSGALG00000017342	5	5	0	4	6	15	8	8	2	6	0	6	2	0	0	0	0	0	2	0	0	0	0	0	0	0	0	0	0	0	0	0	0	0	0	0	0	0	2	0	0	0	0	0	0
ENSGALG00000052904	0	0	8	0	0	0	0	0	0	0	2	3	0	0	0	0	6	7	0	0	0	0	0	0	1	0	0	2	0	0	0	2	0	0	0	0	0	0	0	0	0	0	0	0	0
ENSGALG00000052906	2	2	2	0	0	0	2	0	0	0	0	0	0	0	0	0	0	0	0	0	0	0	0	10	0	0	0	0	0	0	0	0	0	0	0	0	0	0	0	0	5	0	0	0	0
ENSGALG00000052901	0	0	0	0	0	0	0	0	0	0	0	0	0	0	0	0	0	0	0	0	0	0	0	0	0	0	2	0	0	0	0	0	0	1	0	0	0	0	0	0	0	0	0	0	0
ENSGALG00000052900	0	2	0	0	0	0	0	0	0	0	0	0	0	0	0	0	0	0	4	0	2	0	0	0	0	0	0	0	0	0	2	0	0	0	0	0	0	0	0	0	0	0	5	0	0
ENSGALG00000003213	11	5	12	10	24	16	8	3	0	57	60	59	12	7	4	53	39	74	10	56	13	81	52	38	15	51	61	25	155	22	70	45	85	28	74	16	31	40	22	18	45	23	28	76	4
ENSGALG00000038556	842	996	1025	1144	1022	1156	979	694	747	1824	959	1832	277	259	155	2342	2203	1818	170	106	167	3080	3498	2768	212	293	527	1776	3444	2261	628	432	592	1492	1845	1239	222	171	245	1740	1353	1212	255	198	105
ENSGALG00000048873	387	564	537	216	242	362	34	69	65	262	178	331	38	50	20	99	104	148	62	59	46	136	48	165	46	12	40	62	57	93	30	23	10	48	63	38	0	44	19	54	89	66	34	19	8
ENSGALG00000006512	13959	17355	24877	7656	4810	5451	3563	1255	3202	22940	7754	15772	328	2664	6498	8296	3665	6565	1909	2794	3368	12761	16658	9230	1369	2185	3087	19340	25677	14489	17525	23176	19997	59927	22189	30522	15215	11175	10384	41842	46339	46223	31812	22173	26242
ENSGALG00000006507	4788	5805	4496	2063	3073	3275	968	1298	1122	3609	2042	4625	593	471	456	2884	1312	3167	217	88	340	1248	2420	2799	377	240	589	4481	6810	2765	312	520	215	2102	3552	2348	128	282	131	2797	4173	2065	333	244	145
ENSGALG00000007268	12	8	17	178	56	101	34	10	15	67	7	37	4	12	2	105	115	33	2	0	3	154	81	50	2	0	5	101	58	59	0	3	4	126	45	167	4	4	4	148	222	265	0	0	0
ENSGALG00000006490	21	87	92	59	53	19	47	24	10	193	432	13	10	9	13	12	3	11	3	6	4	17	118	8	15	0	0	53	8	18	20	20	10	6	41	5	8	14	18	13	14	12	34	0	12
ENSGALG00000007288	0	0	2	0	0	3	0	0	0	180	39	2	0	0	0	0	0	0	0	0	0	0	2	0	0	0	0	0	0	0	0	0	0	2	4	0	0	0	0	0	0	0	0	0	0
ENSGALG00000049555	0	0	0	0	0	0	0	0	0	0	0	0	0	0	0	0	0	0	0	0	0	0	0	0	0	0	0	0	0	0	0	0	0	0	0	0	6	0	0	0	0	0	0	0	0
ENSGALG00000007315	737	798	1281	642	599	721	710	390	480	500	386	641	808	701	328	359	327	266	347	402	415	458	393	526	572	154	453	618	589	636	323	529	260	453	648	687	646	785	955	665	922	646	942	1313	1356
ENSGALG00000001604	543	48	730	561	441	593	564	597	977	154	148	303	292	508	380	71	44	189	120	269	184	80	45	83	1	173	271	106	78	143	277	190	352	58	40	63	92	108	145	147	74	82	127	147	189
ENSGALG00000049558	0	0	0	0	0	2	5	0	3	0	0	0	0	0	0	0	0	0	0	0	0	0	0	0	5	0	0	0	0	0	0	0	0	24	8	0	0	0	7	0	0	0	0	0	0
ENSGALG00000013091	655	263	580	187	252	247	128	88	85	137	138	173	36	60	37	256	132	103	66	45	43	188	108	196	82	14	179	65	141	105	63	85	12	57	123	136	37	93	60	128	109	113	87	80	52
ENSGALG00000013092	1711	2354	2066	1227	1175	1330	952	928	775	1086	1068	1258	611	1130	629	998	791	836	506	571	529	955	599	962	748	217	484	864	800	836	336	482	180	705	708	1137	606	504	533	954	1034	973	901	771	739
ENSGALG00000013095	122	75	236	67	69	58	52	73	111	234	165	291	97	90	63	142	170	134	20	195	58	124	55	166	75	18	85	83	90	110	20	97	24	51	80	117	43	70	58	43	114	51	65	79	75
ENSGALG00000013098	724	986	1137	331	384	398	292	289	281	8163	8343	11491	205	175	201	13422	6491	11451	126	264	134	9306	7783	9286	211	140	34	13043	10749	13482	172	219	134	9974	9099	9235	128	198	155	12869	10670	334	44	193	75
ENSGALG00000036358	14	10	12	37	5	15	23	5	8	7	0	7	0	0	2	2	0	0	0	0	0	2	0	0	12	0	2	0	2	0	11	2	0	12	4	0	10	0	6	0	2	0	15	0	0
ENSGALG00000013112	494	762	436	525	563	855	233	198	291	882	495	1043	113	133	110	1560	784	1157	227	235	121	1262	1098	2993	306	80	461	1626	1221	1762	345	276	84	1364	627	724	251	100	189	1775	905	1680	565	150	242
ENSGALG00000013134	300	331	244	559	466	620	329	434	290	376	184	187	70	575	211	469	329	320	87	127	83	338	121	213	251	19	164	216	197	186	212	275	53	63	136	91	58	220	121	114	123	86	63	146	108
ENSGALG00000038026	626	860	794	530	507	677	405	434	454	531	281	514	99	386	225	679	352	324	117	147	117	489	305	515	218	12	206	248	328	287	184	169	78	292	288	458	135	137	140	369	371	280	189	198	93
ENSGALG00000038920	19	4	4	4	16	11	2	0	2	59	34	128	2	4	0	6	24	11	23	16	0	4	0	35	10	2	14	4	0	0	0	4	0	3	4	0	0	2	4	0	2	0	4	0	0
ENSGALG00000013143	193	168	50	131	122	275	116	94	58	282	44	164	16	52	13	107	83	65	25	9	18	78	97	63	40	7	66	49	95	67	63	52	19	25	71	20	23	23	26	12	20	26	13	13	16
ENSGALG00000047485	0	2	0	0	0	0	0	0	0	0	0	0	0	0	0	0	0	0	0	0	0	2	0	0	0	0	0	0	0	0	0	0	0	0	0	0	0	0	0	0	0	0	0	0	0
ENSGALG00000040133	0	4	10	8	0	0	2	0	5	0	0	0	0	0	0	0	16	0	3	0	0	0	0	0	5	0	0	0	5	0	0	0	0	0	7	0	0	0	0	0	0	4	0	3	0
ENSGALG00000050507	0	0	0	0	0	0	0	0	0	4	0	8	0	0	0	6	3	3	0	0	0	11	0	7	0	0	0	0	0	0	0	0	0	3	0	0	0	0	11	4	0	0	0	0	0
ENSGALG00000001949	1370	1422	2346	1642	1707	2224	3693	3704	2987	2019	1557	3310	2981	3046	2554	1473	1059	2192	1594	4926	2496	1193	1391	1263	2268	1837	2866	1884	2049	2033	2660	3752	2755	1630	1513	2019	2853	2230	2932	1445	1823	1690	2695	2243	4725
ENSGALG00000051520	12	7	19	103	376	473	171	357	77	7	8	56	41	6	37	4	10	5	12	118	11	34	38	14	36	3	45	0	46	28	283	72	507	91	11	154	201	96	141	111	36	63	786	472	146
ENSGALG00000001975	133	151	12	5	238	212	1206	1924	351	157	595	31	622	215	113	640	153	812	68	208	75	1112	511	546	193	3	196	836	6	424	5	99	144	3	722	10	96	114	38	1093	510	378	6	2	30
ENSGALG00000001963	0	8	5	0	6	3	2	0	0	27	0	15	0	0	0	7	3	7	0	0	0	0	0	0	0	0	0	0	0	6	0	0	0	4	0	0	0	0	0	10	2	0	0	1	0
ENSGALG00000035035	413	538	576	566	507	595	459	299	361	630	563	449	258	421	316	646	464	701	226	260	240	540	396	769	422	275	332	409	402	517	149	229	172	263	286	215	236	268	145	439	306	362	271	306	367
ENSGALG00000002053	848	893	1699	853	1191	1165	843	1126	768	6219	5727	10194	654	404	330	4932	2429	12248	233	338	230	2243	3158	4071	379	290	418	12712	11576	12309	581	305	403	6688	4662	5647	247	269	294	12761	9905	7995	367	348	236
ENSGALG00000002081	566	606	645	522	509	451	209	118	83	237	230	67	109	82	66	78	93	64	63	63	97	76	34	91	126	108	133	18	36	36	166	133	97	17	9	34	104	96	61	23	12	8	110	45	47
ENSGALG00000002060	1379	1547	1698	534	673	794	214	252	268	523	297	438	265	251	163	443	299	301	120	200	155	341	295	484	160	59	199	408	363	291	119	164	120	264	263	337	144	208	168	358	357	240	289	281	231
ENSGALG00000002086	190	260	305	150	139	258	9	17	5	16	7	21	0	0	0	0	4	9	7	2	0	0	32	0	5	0	0	0	63	0	0	7	5	0	5	0	0	11	8	2	8	0	10	11	0
ENSGALG00000020906	16	35	5	15	13	4	8	0	0	58	19	0	0	3	0	0	0	0	10	0	0	2	0	0	0	11	5	0	0	0	0	5	8	0	0	0	0	0	0	0	0	0	0	8	0
ENSGALG00000030194	120	138	313	125	179	177	90	127	134	131	157	166	140	48	53	106	82	164	24	32	38	67	61	120	60	67	37	50	89	92	73	44	55	51	35	79	34	47	52	82	46	72	42	64	44
ENSGALG00000011473	4	14	3	6	11	17	0	6	4	17	6	8	0	8	4	11	11	9	0	0	0	3	7	6	0	0	3	0	3	0	4	0	0	8	2	0	0	0	0	0	0	9	0	3	0
ENSGALG00000046990	0	0	0	0	0	0	0	0	0	5	0	0	0	0	0	0	0	0	0	0	0	0	0	0	0	0	0	0	0	0	0	0	0	0	0	0	0	0	0	0	0	0	0	0	0
ENSGALG00000046994	0	0	0	0	0	0	0	0	0	0	0	2	0	1	0	0	0	0	0	0	0	0	0	0	0	0	0	0	0	0	0	0	0	0	0	0	0	0	0	0	0	0	0	0	0
ENSGALG00000036994	0	0	0	0	0	2	0	0	0	0	0	0	0	0	0	4	0	0	0	0	0	0	0	6	0	0	0	0	0	0	0	0	0	0	0	5	0	0	0	0	0	0	0	0	0
ENSGALG00000001573	14	8	23	9	14	12	4	6	0	6	0	5	7	0	0	0	0	20	0	0	0	15	0	0	0	0	0	5	5	5	0	1	0	6	4	29	0	0	3	3	0	6	0	0	0
ENSGALG00000051665	355	403	565	196	264	294	198	276	186	274	284	286	196	159	105	325	216	205	152	241	145	217	201	276	192	86	219	189	264	305	98	115	49	165	176	247	92	114	146	294	259	225	180	127	86
ENSGALG00000047910	56	57	71	141	110	114	71	106	74	151	85	70	55	39	52	279	191	270	78	65	67	303	278	503	86	40	151	321	205	421	75	88	132	171	206	229	158	80	166	233	193	233	51	54	42
ENSGALG00000012801	103	148	290	508	127	546	556	61	83	2858	2278	2601	1022	341	49	6273	3588	3719	298	29	588	4716	198	6385	549	227	1712	2176	464	269	157	154	80	2464	2151	4343	190	68	562	2121	2425	4678	75	635	664
ENSGALG00000012802	229	2084	1504	1948	2175	2497	1365	1806	1641	1575	6713	14583	4137	909	681	2406	3307	392	424	678	905	8596	1197	595	178	219	2461	1677	282	2628	370	319	267	1055	2941	3479	156	5176	1077	547	396	1292	589	1104	434
ENSGALG00000043041	57	20	83	46	150	97	151	281	210	14	185	46	169	41	33	10	82	2	82	569	117	23	6	0	40	16	114	8	14	0	31	120	15	5	5	3	102	81	114	5	59	6	86	71	5
ENSGALG00000042481	679	727	676	570	82	732	336	259	401	296	92	331	49	385	252	304	226	222	234	192	247	301	258	175	241	166	260	238	320	320	163	202	154	261	224	184	175	196	165	307	274	218	253	200	222
ENSGALG00000012795	103	86	148	64	49	73	11	31	38	87	24	123	10	55	46	124	42	47	35	48	21	50	50	81	30	6	42	37	48	56	45	31	7	27	47	66	58	28	61	74	87	56	66	49	58
ENSGALG00000019568	129	106	127	90	89	89	37	55	27	198	121	156	49	52	47	167	130	91	49	45	42	158	68	115	115	14	71	79	56	46	41	35	3	80	43	49	66	40	13	70	57	69	32	45	22
ENSGALG00000012798	6602	1469	3549	3264	642	2430	496	1238	1282	990	412	669	548	1537	1171	426	2294	384	982	841	1236	523	2490	2857	1478	553	1497	1194	2497	829	867	1469	600	1888	2280	2842	1168	1026	764	2374	411	2258	1546	1782	938
ENSGALG00000012799	4000	4677	3798	4550	4752	5685	2228	2379	3025	2573	1129	1208	962	2417	1721	1702	1327	1236	719	671	752	1402	1378	1614	767	472	1079	932	1315	1111	762	667	156	463	694	406	388	774	462	676	694	596	517	656	334
ENSGALG00000048869	30	85	43	55	46	29	16	39	33	293	66	177	40	1	14	291	508	122	16	0	14	177	128	207	33	13	29	149	269	134	23	64	18	173	99	156	4	8	14	147	133	167	10	26	7
ENSGALG00000050814	92	196	91	94	101	119	62	49	66	691	347	673	113	32	48	720	530	594	27	12	54	525	461	555	62	31	69	521	870	542	64	171	50	443	406	652	45	66	97	509	529	533	58	126	68
ENSGALG00000007435	2057	2733	2569	1556	1706	1741	1353	1837	1477	2885	2712	3557	652	1600	904	3384	1917	2379	723	1045	935	2726	2346	2896	1170	234	1347	2857	2407	2488	905	1371	268	2174	2870	2442	1488	1572	1444	3771	3780	2786	1754	1771	1702
ENSGALG00000053860	0	0	20	0	0	0	0	0	0	180	31	70	0	0	0	23	120	0	0	0	0	73	52	0	0	0	0	0	511	0	0	19	4	11	165	101	0	0	0	0	200	0	5	0	0
ENSGALG00000007417	0	0	0	0	0	3	0	0	0	176	6	0	0	0	0	0	0	0	0	0	0	0	0	0	0	0	0	0	0	0	0	0	0	0	0	0	0	0	2	0	0	0	0	0	0
ENSGALG00000007426	145	86	37	38	36	70	25	15	12	22	13	3	2	38	13	51	11	6	11	5	4	22	44	28	20	4	25	5	20	19	16	37	2	27	25	39	15	17	22	21	23	29	22	34	4
ENSGALG00000039186	402	409	650	345	6	284	177	273	219	2	381	419	173	342	242	1	203	254	2	509	1	210	152	250	272	331	282	191	234	178	298	422	234	175	193	215	423	341	475	308	212	164	424	584	375
ENSGALG00000007408	71	69	108	34	38	106	70	123	112	72	23	23	17	49	44	52	36	41	10	11	17	31	5	20	24	0	92	28	17	19	0	10	3	11	13	19	3	10	9	8	17	24	36	8	0
ENSGALG00000007492	2104	3274	2866	1180	1646	1631	1484	1649	1157	3075	2195	2317	300	2526	1220	2637	1440	1610	942	1171	958	2264	2259	2589	1445	209	1071	2430	2228	2451	850	1277	308	1688	2096	1930	1016	1273	859	2691	2743	2277	1254	1185	1233
ENSGALG00000007507	555	531	632	97	199	202	90	115	194	468	243	409	53	104	94	38	56	53	10	14	6	62	43	74	26	29	37	17	48	16	32	14	4	28	49	18	6	23	12	22	23	27	26	0	17
ENSGALG00000042199	15	3	14	21	15	42	28	29	50	4	0	7	10	6	0	4	16	0	0	0	0	0	0	0	2	0	0	4	0	0	27	0	0	0	4	0	0	0	0	17	0	0	2	2	0
ENSGALG00000051279	0	0	0	2	1	2	0	0	0	0	0	0	0	0	0	0	0	0	0	0	0	0	0	0	7	0	0	0	0	0	0	0	121	0	0	0	0	0	0	0	0	0	0	0	0
ENSGALG00000037826	5	0	2	0	0	0	0	0	0	0	0	0	0	0	0	0	0	6	0	0	0	5	0	0	0	0	0	10	7	6	7	6	5	19	4	26	6	4	4	3	0	3	2	0	5
ENSGALG00000047998	0	0	0	0	0	0	0	0	0	4	2	17	0	0	0	9	21	14	0	10	4	10	10	19	0	3	0	0	11	0	0	2	16	0	14	0	0	12	0	4	11	0	11	20	4
ENSGALG00000043775	43	85	232	310	170	229	285	321	151	126	121	179	52	19	6	360	417	221	42	48	18	345	253	401	54	18	48	185	116	206	135	25	174	141	93	151	52	83	132	123	102	77	70	93	84
ENSGALG00000036380	690	950	1106	2511	2176	2382	3281	4673	3155	1974	3130	3114	3976	2455	971	5572	3920	3645	1624	2310	1883	2811	2395	3944	2281	3020	2635	3971	3687	5035	2051	2007	4022	2631	3691	3982	2349	2442	3327	4401	3959	4458	2528	3191	2316
ENSGALG00000052344	13	15	43	5	11	6	0	3	0	0	0	4	0	5	0	0	0	0	0	0	0	0	0	5	0	0	0	0	0	0	0	2	2	0	0	0	0	0	0	0	0	0	0	2	2
ENSGALG00000039710	1899	2364	2823	2823	780	789	2200	2275	1967	2322	192	4507	230	885	941	3000	261	550	707	777	74	3019	549	692	112	832	1468	1899	311	547	214	658	1445	68	1046	1207	92	635	870	1442	926	164	879	970	369
ENSGALG00000040220	23	48	42	10	2	7	2	0	5	0	0	4	0	0	3	16	0	0	4	0	0	4	0	3	11	0	0	0	5	5	0	0	2	8	0	0	0	2	0	0	0	3	0	0	3
ENSGALG00000033231	449	372	412	64	38	186	43	168	236	292	102	362	40	45	53	14	13	35	6	13	29	38	16	56	40	34	26	10	15	0	16	5	10	0	3	12	13	24	12	0	14	0	0	5	6
ENSGALG00000034025	58	70	35	27	25	18	11	17	26	5	0	3	5	7	9	0	0	3	0	0	3	0	0	0	0	0	5	4	0	0	11	0	5	3	0	0	6	1	7	0	0	0	0	5	0
ENSGALG00000026901	0	0	0	0	0	0	0	0	0	1	0	0	0	0	0	0	0	0	0	0	0	0	0	0	0	0	0	0	0	0	0	0	0	0	0	0	0	0	0	0	0	0	0	0	0
ENSGALG00000048638	0	0	0	0	0	0	0	0	0	0	0	0	0	0	0	0	0	0	0	0	0	0	0	0	0	0	0	0	0	0	0	0	0	5	0	0	0	0	0	0	0	0	0	0	0
ENSGALG00000048635	0	0	0	0	0	3	0	0	0	3	0	0	0	0	0	0	0	0	0	0	0	0	0	0	0	0	0	0	0	0	0	0	0	0	0	0	0	0	0	0	0	0	0	0	0
ENSGALG00000048636	9	10	0	0	0	0	0	0	2	0	0	0	0	0	0	0	0	0	0	0	0	0	0	0	0	0	0	0	0	0	0	0	0	4	0	0	0	0	0	0	0	0	0	0	0
ENSGALG00000003224	0	0	0	0	0	0	0	0	0	4	0	0	0	0	0	0	0	0	0	0	0	0	0	0	0	0	0	0	0	0	0	0	0	0	0	0	0	0	0	0	0	0	0	0	0
ENSGALG00000048094	0	0	0	0	0	0	0	0	0	4	0	7	0	3	0	0	4	0	0	0	0	0	0	0	0	0	0	2	4	0	0	0	0	0	0	0	0	0	0	0	0	0	0	0	0
ENSGALG00000048095	9	5	8	6	2	7	1	1	1	0	0	1	1	0	0	1	0	0	1	0	0	1	1	2	0	0	2	0	1	1	0	0	0	0	1	0	0	0	0	1	2	0	0	0	0
ENSGALG00000048096	2	2	0	0	0	0	6	0	0	0	0	0	0	8	7	0	7	0	0	0	11	0	0	0	3	0	0	0	0	0	0	10	0	0	2	0	3	4	0	0	0	0	4	0	13
ENSGALG00000048090	0	2	0	0	0	0	0	0	0	0	0	0	0	0	0	0	0	0	0	0	0	0	0	0	0	0	0	0	0	0	0	0	0	0	0	0	0	0	0	0	0	0	0	0	0
ENSGALG00000048098	9	15	21	20	11	16	0	0	0	8	10	12	2	5	4	0	0	0	0	0	0	4	5	23	0	9	0	19	11	7	14	4	0	5	3	13	0	6	0	0	9	5	0	2	7
ENSGALG00000048099	0	0	0	0	0	0	0	0	0	0	0	0	0	0	0	0	0	0	0	0	0	0	0	0	0	0	7	0	0	0	3	0	0	0	0	0	0	0	0	0	0	0	0	0	0
ENSGALG00000049948	0	0	0	0	0	0	0	0	0	0	0	0	0	0	0	0	0	0	0	0	0	0	0	0	0	0	0	0	0	0	0	0	0	0	4	0	0	0	0	0	0	0	0	0	0
ENSGALG00000049941	0	0	0	0	0	0	0	0	0	0	0	0	0	0	0	0	0	0	0	0	0	0	0	0	0	0	0	0	0	0	0	0	0	0	0	0	0	0	1	0	0	0	0	0	0
ENSGALG00000049940	2	0	0	0	2	0	2	0	0	0	0	0	0	0	0	0	0	0	0	0	0	0	0	0	0	0	0	0	0	0	0	0	0	0	0	0	0	0	0	0	0	0	0	0	0
ENSGALG00000049943	0	0	0	0	0	0	0	0	0	0	0	0	0	0	0	0	0	0	2	0	0	0	0	0	0	0	0	0	0	0	0	0	0	2	0	0	0	0	0	0	0	0	0	0	0
ENSGALG00000049947	0	0	7	0	2	0	0	0	0	0	9	0	0	0	0	0	2	0	0	0	0	0	0	0	0	0	0	0	0	0	0	0	0	0	0	0	0	0	3	0	0	0	0	0	0
ENSGALG00000033499	0	0	0	0	0	2	0	0	0	2	6	8	0	0	0	3	0	26	0	0	0	2	2	0	0	0	0	0	4	0	0	0	0	6	0	0	0	0	0	0	0	2	0	0	0
ENSGALG00000033720	1	0	0	0	0	0	0	0	0	0	0	0	0	0	0	0	0	0	0	0	0	0	0	0	0	0	0	0	0	0	0	0	0	0	0	0	0	0	0	0	0	0	0	0	0
ENSGALG00000054444	13	13	11	0	0	0	0	0	0	11	0	0	0	0	0	0	0	0	2	0	0	0	0	0	0	0	0	0	0	0	0	0	0	0	0	0	0	0	0	0	2	0	0	0	0
ENSGALG00000052252	50	76	67	3	4	22	10	2	0	228	53	0	0	0	3	0	2	0	3	0	4	3	2	0	15	6	8	0	3	15	9	3	0	0	0	4	0	3	4	0	0	0	16	4	2
ENSGALG00000008889	1236	1229	1573	371	796	1009	299	405	345	932	530	827	90	349	248	771	540	744	214	183	157	741	528	718	441	33	305	481	372	502	154	164	45	253	249	303	190	159	176	327	373	568	198	149	136
ENSGALG00000043386	8	11	14	2	14	9	6	4	2	2	0	4	0	4	2	3	0	0	7	4	2	3	0	5	9	1	6	2	0	0	14	3	2	9	1	0	4	5	0	0	0	0	4	2	6
ENSGALG00000008839	1554	1620	1712	899	1048	1307	569	489	556	2206	1012	1494	172	765	741	1288	857	1021	256	273	248	905	738	1256	370	65	381	766	737	668	327	299	100	562	670	605	156	215	177	754	965	916	292	318	195
ENSGALG00000043460	19	2	21	6	4	25	25	13	5	210	51	2	2	2	4	0	2	0	0	5	0	0	0	0	0	2	0	0	2	0	0	0	0	1	1	0	0	0	0	0	0	0	0	0	0
ENSGALG00000008852	205	229	408	269	267	261	464	514	513	13	401	11	263	442	412	782	549	161	514	123	829	470	398	625	795	258	1069	573	377	799	268	1047	570	502	404	1024	1145	1036	1406	924	713	24	52	1200	1196
ENSGALG00000008864	3244	3636	1585	4063	3380	3958	4161	1767	3975	836	346	1603	1198	7362	6835	1793	1200	1232	2621	5092	1010	1535	1389	1956	5369	523	4422	1663	308	1475	3748	1458	959	1499	1339	1673	3749	4151	2516	2020	1984	1693	6451	5373	7474
ENSGALG00000034694	0	1	0	1	0	0	0	0	0	0	0	0	0	0	0	0	0	0	0	0	0	0	0	1	6	0	1	0	0	0	0	0	2	0	0	0	0	0	0	0	0	0	0	0	1
ENSGALG00000008909	862	1123	502	2074	2066	2359	3298	2735	2180	124	7	114	753	6287	2624	46	370	44	1496	431	1796	150	40	298	3125	376	2774	213	67	244	1373	1728	516	35	46	139	2100	2447	1209	18	31	211	2895	2401	3277
ENSGALG00000002980	310	252	124	95	109	127	59	81	99	216	57	164	17	49	108	52	19	36	23	0	21	30	48	57	37	7	15	41	102	61	14	24	8	37	56	31	11	17	5	81	42	46	15	5	6
ENSGALG00000050680	81	95	89	93	76	75	89	96	50	96	62	123	52	235	115	47	44	79	236	398	244	56	75	100	200	89	274	36	30	32	129	270	126	13	33	37	135	197	203	40	25	33	201	214	231
ENSGALG00000047676	8	14	22	8	18	17	46	23	25	27	18	15	31	46	19	5	11	17	26	32	61	10	5	16	65	18	36	2	20	6	18	36	70	3	3	12	58	42	40	10	4	9	15	40	48
ENSGALG00000038593	0	0	165	81	119	152	44	47	46	0	41	0	83	0	0	0	53	0	0	0	65	33	32	50	0	0	0	48	0	51	0	0	97	49	57	99	74	46	88	36	26	19	58	61	23
ENSGALG00000050884	1529	1843	2162	779	1358	934	1038	812	736	1190	857	738	815	966	667	19	759	936	681	813	735	1076	1128	1707	645	627	534	1348	1288	1279	540	703	683	825	733	823	445	357	375	1234	1086	961	394	566	393
ENSGALG00000040971	5	8	80	54	62	87	65	22	44	11	11	10	35	8	2	13	23	11	10	13	13	284	187	47	9	4	7	59	60	76	45	13	174	366	244	782	47	27	71	472	556	253	56	159	19
ENSGALG00000053086	2	2	2	0	0	0	0	0	4	0	0	0	0	0	0	3	0	0	0	0	0	2	2	0	0	0	0	0	0	0	0	0	0	2	4	0	0	0	2	0	0	0	0	6	0
ENSGALG00000002959	877	1252	1101	938	1068	1030	1125	1377	805	1220	1019	1264	752	1980	1040	1011	817	724	3896	3314	3333	717	508	975	4276	492	3928	607	638	617	1820	3257	884	367	621	531	4202	4803	4118	481	587	504	3375	5078	3629
ENSGALG00000027741	0	0	0	0	1	1	4	0	0	0	0	0	0	2	0	2	0	2	0	1	0	2	0	0	0	3	0	0	1	0	0	0	5	0	0	0	2	0	0	0	0	6	0	0	1
ENSGALG00000002942	3387	3276	3238	2890	3119	4825	1601	2178	1886	3328	989	1981	394	1906	978	1932	1718	1376	766	629	488	1685	1586	2246	1136	262	1345	1189	1131	1356	1124	1212	263	1017	1757	1850	1037	1265	959	1576	1600	1471	849	825	544
ENSGALG00000018255	0	1	0	0	0	0	0	0	0	1	0	0	0	0	0	0	0	0	0	0	0	0	0	0	0	0	0	0	0	0	0	0	0	0	0	0	0	0	0	0	0	0	0	0	0
ENSGALG00000018254	0	0	0	0	0	0	0	0	0	2	0	0	0	0	0	0	0	0	0	0	0	0	0	0	0	0	0	0	0	0	0	0	0	0	0	0	0	0	0	0	0	0	0	0	0
ENSGALG00000011000	312	384	393	142	293	350	74	107	62	238	131	212	17	45	25	257	76	128	67	28	46	105	64	80	37	4	48	115	67	61	30	31	5	8	43	43	16	46	11	39	31	44	19	18	14
ENSGALG00000025349	0	0	2	0	0	1	0	0	1	0	0	0	0	1	1	0	0	0	0	0	0	0	0	0	0	0	0	0	0	0	0	0	1	0	0	0	0	0	0	0	0	0	0	0	2
ENSGALG00000007525	89	48	78	10	33	47	5	133	65	64	9	52	6	353	11	5	7	7	5	0	6	1	2	3	8	8	38	3	6	3	1	4	0	0	0	0	0	11	6	0	10	3	0	3	42
ENSGALG00000004841	468	586	937	3319	2548	2947	886	917	1017	168	389	484	198	146	64	67	478	118	14	16	52	384	443	992	38	14	160	233	36	400	21	13	51	52	36	69	26	16	6	48	30	137	18	12	12
ENSGALG00000054034	3652	5080	4121	2621	3123	3377	1758	1431	1193	6959	2834	5790	1442	893	518	6355	3754	4591	557	262	545	5566	4468	4539	656	702	1152	4813	5067	4901	1276	1069	1157	2823	4916	3798	388	737	657	5224	3880	3495	626	791	338
ENSGALG00000007520	1785	2110	2922	1122	616	780	798	1091	1235	522	1164	1082	893	513	152	668	443	235	376	115	370	612	745	433	304	191	404	801	552	306	310	341	286	464	617	742	256	433	472	722	793	656	372	206	189
ENSGALG00000040479	5	2	11	0	0	3	0	0	0	0	0	0	0	0	0	0	0	1	0	0	0	0	0	0	3	0	0	0	0	0	0	3	0	2	0	0	0	0	0	0	0	2	0	0	0
ENSGALG00000043860	2	4	0	0	0	3	0	0	0	0	0	0	0	0	0	0	0	0	0	0	0	0	2	0	0	0	0	0	0	0	0	0	0	0	0	0	0	0	3	0	0	0	0	0	0
ENSGALG00000020479	210	181	279	112	126	172	162	112	115	127	396	161	91	68	15	79	69	95	10	36	5	76	81	75	51	5	45	54	57	50	49	27	78	51	88	142	8	45	26	58	35	110	34	36	31
ENSGALG00000032903	191	211	1061	2033	1374	1470	1593	1522	1622	128	696	1	1574	446	292	98	441	115	40	31	153	454	375	527	50	24	96	413	46	342	33	53	282	283	366	463	45	193	95	425	322	232	228	254	200
ENSGALG00000004845	504	761	918	873	588	666	1122	1146	1381	400	460	657	1450	620	582	454	506	521	578	2151	588	307	275	571	698	1206	996	296	340	270	866	793	1343	297	235	449	569	423	1013	470	262	262	635	487	375
ENSGALG00000017320	1029	1243	1740	1082	823	1187	759	675	554	579	763	1137	333	519	423	1122	665	748	198	837	296	997	615	847	349	59	371	1022	810	743	312	505	187	880	901	1463	339	393	307	1259	1153	1024	523	465	454
ENSGALG00000017321	374	297	399	224	162	216	296	232	268	879	808	1201	219	178	122	1686	844	1067	198	372	223	1007	712	944	197	79	309	973	698	1211	216	222	208	661	505	772	221	224	287	1282	1139	805	388	328	219
ENSGALG00000047542	52	69	52	79	44	40	39	37	23	41	54	62	40	20	15	56	78	57	20	36	49	30	26	37	27	23	32	33	23	52	38	26	55	32	17	20	46	36	41	51	26	22	35	34	14
ENSGALG00000017319	800	918	1001	668	983	881	429	449	499	505	451	874	452	369	257	515	299	487	190	387	340	477	404	442	402	213	265	408	470	392	167	467	248	253	355	402	402	289	486	379	377	236	383	414	368
ENSGALG00000017317	0	2	2	8	2	10	6	4	0	30	0	2	0	0	0	16	6	15	0	5	0	5	0	6	0	0	3	0	0	3	6	0	3	0	0	0	0	4	0	0	0	0	0	0	1
ENSGALG00000017318	72	92	72	9	14	27	7	13	0	69	38	61	15	5	0	61	79	73	9	0	7	23	54	15	4	15	0	12	16	0	12	12	9	24	6	15	2	9	6	24	25	49	8	5	0
ENSGALG00000052611	174	201	264	84	79	104	80	89	87	168	107	130	93	42	27	69	74	88	28	48	27	115	108	123	48	20	55	56	52	57	19	16	21	41	38	37	16	38	35	39	59	65	21	48	19
ENSGALG00000017316	12	23	31	24	31	18	3043	1798	309	26	9	57	9010	6177	2698	3	370	31	5651	23144	9902	22	14	23	6215	11132	8013	2	15	20	5664	5568	15061	13	6	10	14087	18847	22765	10	13	0	4700	7225	10160
ENSGALG00000017312	3361	3572	4184	2305	2366	2333	1372	1397	1259	1698	924	1562	977	975	610	1999	1215	1664	407	234	451	1736	1416	2256	619	516	626	1541	1548	1491	678	522	665	896	1389	796	264	528	281	1689	1548	1342	523	571	353
ENSGALG00000017314	102	125	80	46	33	58	25	33	47	96	5	48	19	8	26	20	27	22	26	3	7	27	19	41	17	13	10	37	25	14	10	10	3	10	15	0	0	19	12	14	15	3	5	8	9
ENSGALG00000053504	0	0	0	10	0	0	0	0	0	5	0	4	0	0	0	0	0	2	0	0	0	0	0	0	0	0	0	0	0	0	0	0	0	0	0	0	0	0	0	0	0	0	0	0	0
ENSGALG00000053505	0	0	0	0	0	0	0	0	0	0	0	3	0	0	0	0	3	4	0	0	4	0	0	0	0	0	2	0	10	0	0	0	0	0	2	2	4	0	4	0	3	0	0	8	0
ENSGALG00000053501	0	0	0	0	0	0	0	0	0	0	0	0	0	0	0	0	0	0	0	0	0	0	0	0	0	0	0	0	0	0	0	3	0	0	0	0	0	0	0	0	0	0	3	0	0
ENSGALG00000053914	35	31	20	0	6	2	0	0	10	3	36	20	8	6	2	20	4	16	3	0	0	11	25	17	2	2	2	18	14	0	6	4	6	8	10	23	3	6	7	14	6	8	4	10	2
ENSGALG00000049172	6	4	8	0	3	4	0	4	2	0	38	6	0	0	0	15	47	55	0	0	0	10	23	55	3	0	11	11	55	11	17	3	12	20	17	6	3	0	10	13	17	2	5	14	2
ENSGALG00000053881	53	46	98	35	100	76	19	37	33	24	4	0	12	3	11	2	20	16	3	0	19	5	19	20	3	4	2	19	0	11	0	0	37	7	9	18	0	5	5	0	5	0	6	22	10
ENSGALG00000048430	1312	2050	2329	750	876	1697	508	772	1221	683	554	920	315	659	347	608	277	709	271	89	267	686	887	730	366	474	383	801	827	783	488	432	457	555	332	413	341	312	222	578	546	358	474	510	255
ENSGALG00000047094	137	122	490	38	78	293	60	101	185	22	10	36	12	23	24	52	34	272	34	14	72	169	108	299	38	8	119	89	70	122	90	12	54	17	16	35	25	16	36	24	38	40	64	84	14
ENSGALG00000032219	938	949	2187	407	793	799	339	625	321	360	383	542	101	10	10	243	682	487	80	8	108	690	661	568	129	0	44	419	253	291	85	66	112	341	322	409	88	92	13	263	304	264	161	233	50
ENSGALG00000047914	31	4	387	9	0	168	48	1	41	47	14	0	18	0	7	89	11	119	36	0	81	13	4	149	0	4	79	5	0	5	16	6	10	30	4	9	38	2	67	2	0	142	20	8	108
ENSGALG00000051331	10	48	256	23	10	85	18	10	32	56	16	9	11	0	0	72	12	143	0	2	22	6	63	108	0	14	16	0	61	2	8	8	0	49	23	33	9	14	15	17	25	177	0	4	14
ENSGALG00000048860	0	0	0	12	39	15	9	0	0	0	0	0	0	0	0	0	0	0	0	0	0	0	0	0	0	0	0	0	0	0	0	0	0	0	0	0	0	0	0	0	0	0	0	0	0
ENSGALG00000031341	64	22	26	28	46	35	3	18	36	77	12	94	5	45	11	84	134	89	31	6	16	203	179	150	60	0	44	62	123	144	30	5	24	104	71	148	57	123	125	60	59	96	32	72	0
ENSGALG00000006702	1431	2124	2150	2750	2419	3002	4620	5757	4097	7739	12383	8797	7380	2145	1252	39298	23173	22606	2500	5856	2319	55399	51449	60495	4841	5091	5095	31208	28856	36664	4991	4154	9018	30861	28797	34059	2150	2303	2759	53229	47756	50243	2527	2992	3020
ENSGALG00000021135	250	526	452	318	271	414	158	103	141	598	635	284	215	96	57	843	828	1233	54	113	162	355	538	1370	180	184	222	846	433	414	243	165	239	227	341	432	38	62	113	582	561	508	83	176	41
ENSGALG00000006725	482	108	47	126	93	321	16	0	31	50	51	160	0	22	10	10	13	118	4	0	0	6	3	0	4	3	0	13	12	47	3	0	0	18	14	10	0	3	0	24	8	6	0	0	0
ENSGALG00000044204	26	40	49	48	26	10	40	80	42	32	22	35	127	55	17	35	41	33	44	24	24	19	25	31	59	48	23	20	42	28	61	47	58	43	31	46	26	35	23	46	38	43	37	53	69
ENSGALG00000025378	0	1	0	0	0	0	0	0	0	0	2	0	0	0	0	0	0	1	0	0	0	0	0	0	0	0	0	0	0	0	0	0	0	0	0	0	0	0	0	0	0	0	0	0	0
ENSGALG00000018258	0	0	0	0	2	1	0	0	0	0	2	1	2	0	0	0	0	0	0	0	0	0	0	0	0	0	0	0	0	0	0	0	0	0	0	0	0	0	0	0	0	0	0	0	0
ENSGALG00000006750	413	422	277	305	277	363	212	214	202	360	115	233	198	195	140	236	213	137	183	49	275	260	252	206	178	299	312	162	197	200	226	286	314	84	189	112	222	273	310	88	90	113	234	306	191
ENSGALG00000006777	293	353	660	288	287	420	214	285	403	434	401	617	378	393	307	711	397	369	401	952	446	460	296	588	570	524	568	363	423	402	444	564	908	388	221	400	516	432	711	645	412	332	443	497	488
ENSGALG00000006782	329	497	772	529	584	701	476	430	477	264	355	537	440	396	192	380	325	385	101	460	248	353	181	361	194	78	309	370	291	330	197	250	438	189	299	374	382	291	406	350	409	237	389	308	355
ENSGALG00000046795	106	385	448	198	246	279	182	391	373	264	287	267	168	184	162	281	232	220	134	273	145	230	187	303	181	116	185	203	148	222	191	114	176	131	136	211	94	164	139	204	132	147	113	122	115
ENSGALG00000012229	264	372	265	386	328	412	30	25	304	233	24	616	19	17	6	519	608	382	38	1615	1506	22	343	290	524	40	29	8	18	386	31	742	2544	24	295	30	27	25	977	28	415	242	531	260	279
ENSGALG00000047825	1	0	2	0	0	0	0	0	0	11	5	27	0	0	0	13	0	40	0	0	0	11	1	0	0	0	0	0	0	0	0	0	0	0	0	0	0	0	0	0	3	1	0	3	0
ENSGALG00000047347	0	0	5	0	0	0	0	0	0	0	1	0	9	0	6	0	0	2	0	0	0	0	0	0	0	0	2	0	1	0	2	0	7	0	0	0	2	12	0	0	0	0	2	0	2
ENSGALG00000012263	1166	1180	1689	620	843	801	839	1533	1029	732	874	1208	742	862	647	1176	745	994	638	1630	719	923	597	899	1030	672	749	954	750	699	955	1174	1281	680	559	735	989	1014	1028	819	707	712	1397	1584	1530
ENSGALG00000012241	959	1217	1820	978	1549	1518	969	1766	1430	844	1384	846	1516	1349	430	1302	977	1113	1078	1460	1238	98	717	1556	1442	1260	1299	427	707	854	370	577	1696	563	381	397	540	1722	1539	908	714	396	425	2599	2358
ENSGALG00000019662	0	0	6	0	0	4	0	0	0	3	0	0	0	0	0	0	0	0	0	0	0	0	0	0	0	0	0	0	0	0	0	0	0	6	0	0	0	0	0	0	0	0	0	0	0
ENSGALG00000045557	0	2	27	0	0	2	0	0	0	10	0	18	0	0	0	0	10	7	0	0	0	0	3	0	0	0	0	0	0	0	2	2	0	5	4	3	0	5	2	2	11	6	0	3	4
ENSGALG00000053724	0	7	7	98	79	42	28	19	20	5	7	5	0	14	4	11	2	2	0	0	2	0	0	0	0	7	0	0	0	0	7	7	0	6	5	0	7	3	0	0	5	2	0	0	0
ENSGALG00000015795	392	567	497	369	346	655	202	170	107	768	341	706	120	93	61	1059	678	646	82	69	51	789	353	678	92	19	129	1209	866	835	34	36	13	245	429	256	16	24	11	605	452	312	11	44	20
ENSGALG00000020984	3	5	9	0	0	3	0	0	0	0	0	0	0	0	0	0	0	0	0	0	0	0	0	0	0	0	0	0	0	0	0	0	0	0	0	0	0	0	0	0	0	0	0	0	0
ENSGALG00000040342	569	700	647	1658	2055	1618	1850	1510	1366	1147	411	1182	865	149	144	1058	708	933	196	37	187	3109	3429	2182	201	121	212	2171	3216	1839	1316	1221	337	2752	3257	5591	294	505	899	1881	5617	1431	574	958	213
ENSGALG00000053764	43	38	51	11	17	36	22	4	15	37	7	19	4	0	6	13	6	15	0	0	7	19	16	56	6	7	18	17	11	21	15	2	6	14	14	20	7	4	17	17	7	11	13	0	0
ENSGALG00000020989	0	0	0	3	0	0	0	0	0	0	0	0	0	0	0	0	0	0	0	0	0	0	0	0	0	0	0	0	0	0	0	0	0	0	0	0	0	0	0	0	0	0	0	0	0
ENSGALG00000004442	702	982	1328	492	439	474	448	485	435	605	475	958	398	420	398	650	385	530	334	980	297	697	721	947	480	268	463	472	534	512	380	462	376	616	331	662	580	298	533	533	723	537	537	310	399
ENSGALG00000010792	3	7	9	8	0	0	0	8	3	11	0	3	0	14	0	4	0	3	16	46	38	14	7	16	39	4	45	16	25	3	51	46	7	8	22	11	95	42	43	11	9	13	118	44	86
ENSGALG00000033807	79	120	833	389	475	444	322	261	280	76	701	134	424	25	17	41	330	62	10	36	280	342	261	408	34	30	19	325	16	420	32	21	666	226	223	170	289	223	301	248	247	179	164	289	194
ENSGALG00000015802	296	369	456	212	257	235	109	184	181	377	320	403	216	154	87	261	210	257	158	293	125	196	134	297	167	126	245	107	216	146	112	169	96	121	195	130	196	154	145	144	171	70	195	204	111
ENSGALG00000014736	47	26	23	6	15	13	5	5	6	11	24	9	2	0	0	13	3	3	0	3	0	5	3	3	0	3	0	14	0	0	4	4	0	4	5	11	7	2	1	0	10	14	6	8	6
ENSGALG00000001849	301	366	227	286	274	381	199	76	112	124	78	83	38	87	48	68	128	101	36	14	46	143	315	194	30	79	51	48	95	85	69	60	68	22	106	103	24	58	42	49	77	75	33	44	25
ENSGALG00000002784	199	240	122	120	135	154	121	133	99	162	271	277	142	76	43	236	122	249	44	107	55	205	97	109	28	87	34	139	130	93	43	33	121	66	92	136	46	44	39	106	102	77	88	31	33
ENSGALG00000033303	152	91	221	87	99	174	90	62	27	87	111	111	75	62	47	99	104	104	43	44	45	101	181	232	35	20	44	210	72	206	101	21	57	105	120	178	46	39	29	158	71	149	63	73	50
ENSGALG00000002722	24	35	102	16	51	97	91	92	25	308	370	261	54	28	11	209	448	274	33	0	31	321	176	209	23	16	7	282	119	134	58	28	76	248	127	185	31	76	60	209	96	66	63	76	29
ENSGALG00000037784	13201	17687	17067	54781	48105	53955	28753	20844	22840	7952	6028	6766	6981	11559	6458	6818	8362	5910	2695	2407	4645	13832	15607	12187	4317	3406	3959	9294	6091	13818	4978	4564	8508	5985	11301	13197	2262	2423	2533	9317	9407	8572	2985	3774	2256
ENSGALG00000025844	99	96	1309	534	513	634	204	207	287	76	1180	231	147	14	10	68	605	92	17	8	53	877	1151	1225	11	8	22	755	31	979	20	27	177	786	1003	1636	41	117	59	1039	1025	802	89	104	73
ENSGALG00000050845	7	18	129	26	97	63	18	22	35	3	32	33	9	5	7	37	18	9	0	0	7	38	42	41	0	6	0	10	3	57	7	3	25	0	20	36	0	12	8	9	7	25	5	11	4
ENSGALG00000036263	147	322	388	202	230	254	123	160	133	87	191	159	30	27	26	142	157	60	25	56	23	210	100	133	25	33	16	69	63	89	37	52	116	53	84	112	11	25	10	58	85	83	24	19	21
ENSGALG00000002510	1561	1590	2090	1353	1645	1596	1483	1579	1132	1386	1320	928	992	400	338	1352	1414	1082	363	219	382	1502	1135	1461	570	557	497	718	884	928	514	370	695	635	662	830	276	343	342	735	692	855	287	443	268
ENSGALG00000002500	126	165	626	353	461	434	209	193	235	91	658	185	283	77	68	62	274	121	40	124	118	434	476	488	56	47	46	404	54	449	103	49	247	309	404	569	127	126	98	326	360	330	161	131	91
ENSGALG00000051217	0	0	0	0	0	0	0	0	0	0	0	0	0	0	0	0	0	0	0	0	0	0	0	0	0	0	0	0	0	0	0	0	0	18	2	0	0	0	0	0	0	0	0	0	0
ENSGALG00000016557	0	0	0	0	0	2	0	0	0	3	0	0	0	0	0	0	0	0	0	0	0	0	0	0	0	0	0	0	0	0	0	0	0	0	0	0	0	0	0	0	0	0	0	0	0
ENSGALG00000037026	26	57	48	15	25	35	5	4	5	44	97	83	15	4	6	104	148	127	9	48	0	70	44	86	19	24	40	40	76	34	19	30	17	30	30	34	6	30	10	59	36	49	14	47	7
ENSGALG00000030643	375	533	372	174	170	223	104	124	121	243	67	184	53	42	29	135	87	153	19	4	19	125	165	184	34	27	49	88	111	129	32	25	45	19	133	152	0	12	27	44	82	50	23	13	14
ENSGALG00000009147	477	578	555	260	332	361	166	197	158	868	536	663	129	198	101	747	448	656	40	97	119	512	424	728	133	86	190	520	442	468	116	157	93	352	268	425	100	74	82	361	307	324	97	129	35
ENSGALG00000036711	521	830	893	584	577	742	448	574	789	9084	12544	12850	732	328	362	4917	3607	11198	230	715	295	4891	9013	11165	461	470	478	7751	8470	10729	851	542	636	8318	9778	10363	129	465	502	11530	15176	10464	523	498	247
ENSGALG00000043660	10	0	28	5	40	3	2	3	6	23	38	32	8	6	5	17	5	37	3	0	1	8	64	74	11	1	2	27	24	28	21	7	1	3	13	17	6	5	8	7	12	22	4	19	5
ENSGALG00000027316	18	3	249	5	9	0	0	0	0	0	4	0	0	0	0	0	0	3	0	0	0	9	2	0	0	0	2	3	0	3	0	0	0	5	0	4	0	0	0	14	3	0	0	0	0
ENSGALG00000053966	0	0	0	0	0	0	0	0	0	0	0	0	0	0	0	2	0	140	0	0	0	6	10	5	0	0	0	0	0	0	0	0	0	0	5	22	0	0	2	0	0	0	0	0	0
ENSGALG00000054721	0	0	0	5	13	0	0	0	0	4	0	0	0	0	0	0	0	225	0	0	0	0	0	0	0	0	0	0	0	0	0	0	0	16	5	13	0	0	0	0	11	5	0	0	0
ENSGALG00000046393	0	0	0	0	0	0	3	0	0	12	0	5	0	0	0	35	29	64	2	0	8	30	46	57	5	15	13	18	39	7	1	3	20	3	24	7	0	16	17	0	0	11	0	25	4
ENSGALG00000006229	24	17	39	13	23	51	16	15	16	290	371	370	22	6	11	295	326	101	38	64	119	305	495	766	69	175	219	247	583	239	182	256	268	148	249	186	82	364	130	230	276	253	167	378	90
ENSGALG00000047404	0	0	1	0	0	1	0	0	0	0	0	0	0	0	0	0	0	40	0	0	0	0	0	0	0	0	0	0	0	0	0	0	0	0	0	0	1	0	0	0	0	0	0	0	0
ENSGALG00000054471	0	0	0	0	5	2	0	0	0	0	0	0	0	0	0	0	1	348	0	0	0	1	0	0	0	0	0	0	2	0	1	0	1	0	0	1	0	0	0	0	0	1	0	0	0
ENSGALG00000030051	720	459	394	390	464	528	259	100	324	149	445	619	100	204	201	493	416	131	198	300	177	484	322	161	198	53	196	333	172	346	221	225	77	214	175	337	99	75	65	381	216	106	143	252	305
ENSGALG00000049762	29	31	22	13	22	38	43	16	24	21	56	22	21	16	0	47	20	27	3	21	23	23	7	56	14	20	6	0	18	39	0	8	17	18	6	19	4	0	9	11	11	8	12	6	0
ENSGALG00000050359	2	0	3	0	2	0	0	0	0	11	0	8	0	0	0	4	6	27	0	0	6	15	8	3	6	2	11	31	25	1	0	2	5	11	3	10	4	7	5	6	10	1	9	18	9
ENSGALG00000033082	7	3	1	0	1	2	2	1	0	1	2	0	0	0	0	1	1	0	0	0	0	0	0	0	1	0	2	0	1	0	0	0	0	0	0	0	0	0	0	0	0	0	1	0	0
ENSGALG00000050600	0	0	0	0	0	0	0	0	0	0	0	0	0	0	0	0	0	0	0	0	0	0	0	0	0	2	0	0	0	0	0	0	0	0	4	0	0	2	0	0	0	0	0	0	0
ENSGALG00000047476	0	0	0	4	0	3	0	0	0	0	0	0	0	0	0	0	0	118	0	0	0	0	0	0	0	0	0	0	0	2	0	0	0	0	0	0	0	0	0	0	0	0	0	0	0
ENSGALG00000050877	0	0	0	0	0	0	0	0	0	0	0	0	0	0	0	0	0	19	0	0	0	0	0	0	0	0	0	0	0	0	0	0	0	0	1	0	0	0	0	0	0	0	0	0	0
ENSGALG00000042052	645	747	906	1040	978	966	800	813	809	452	425	581	278	399	284	645	519	534	174	174	172	753	549	634	182	107	192	546	522	513	200	157	109	504	377	615	191	196	191	638	588	751	196	220	175
ENSGALG00000033598	550	491	1853	1250	350	1135	373	315	507	908	532	678	210	267	334	191	428	560	181	203	185	689	619	821	238	58	72	53	775	212	199	411	93	739	1022	1039	296	330	241	149	993	65	312	387	361
ENSGALG00000044485	20	24	40	49	40	82	12	12	25	104	123	199	37	11	6	90	56	48	8	2	4	123	71	65	10	6	20	68	50	26	18	30	20	52	64	16	8	21	29	48	21	8	43	13	11
ENSGALG00000012449	2653	2855	1906	2920	2518	3139	1667	1800	1448	2469	580	1546	553	2375	1608	1732	1048	1162	1082	416	841	1550	1384	1191	1550	414	1519	1200	1294	1330	1228	1471	426	904	1235	779	1142	1456	723	1027	1192	1147	876	1640	1029
ENSGALG00000012448	7	5	304	89	91	158	24	35	67	135	89	26	27	38	45	102	44	101	39	77	32	41	64	55	41	19	46	86	70	99	11	23	12	90	86	86	26	26	25	153	101	124	19	13	27
ENSGALG00000012444	2522	2518	2067	2395	2292	2509	1150	1196	775	1514	789	980	319	721	516	769	951	673	258	179	473	1138	981	1129	377	94	347	642	672	1057	111	336	141	565	833	809	279	389	304	801	788	632	198	332	165
ENSGALG00000052331	0	13	15	2	0	0	0	0	0	36	26	44	5	0	0	49	31	18	0	0	0	12	0	10	2	0	0	7	2	0	4	0	0	13	0	7	0	4	0	7	0	7	0	0	0
ENSGALG00000047423	0	0	0	0	0	0	0	0	0	0	0	0	0	0	0	0	0	2	0	0	0	0	0	0	0	0	0	0	0	0	0	0	0	2	6	0	0	0	0	0	0	0	0	0	0
ENSGALG00000049902	76	77	70	21	42	67	4	9	3	143	118	141	15	13	12	290	125	171	10	19	28	143	173	273	37	2	12	159	94	162	20	4	2	66	88	77	10	14	7	97	111	186	14	5	12
ENSGALG00000041782	15	0	0	26	3	0	0	0	0	42	27	101	0	0	7	13	20	16	1	0	0	13	35	7	0	4	0	292	21	17	2	0	0	181	13	9	0	3	0	12	10	14	3	0	0
ENSGALG00000039152	7	10	28	3	3	6	3	1	3	18	10	47	3	3	4	19	21	34	1	9	6	7	12	23	8	0	4	4	14	22	2	2	0	4	2	19	3	4	2	25	11	11	2	2	5
ENSGALG00000012453	408	589	438	345	377	470	253	210	220	450	225	309	40	211	151	473	211	284	98	61	85	377	253	331	131	34	153	210	194	156	124	112	34	165	165	194	78	94	115	215	189	188	111	117	88
ENSGALG00000049133	33	38	39	34	45	31	38	39	35	61	30	34	8	28	24	41	37	30	16	13	18	24	31	39	27	4	25	26	21	32	19	21	9	17	26	27	11	16	13	24	27	39	21	19	25
ENSGALG00000048321	197	159	167	91	145	238	89	56	69	217	11	89	20	70	41	116	55	83	47	14	30	77	99	29	95	0	71	85	107	49	52	55	13	41	84	41	14	51	59	20	43	34	20	43	29
ENSGALG00000042079	4691	5925	1781	8030	9032	13341	3826	3849	3564	1456	266	1264	2895	2279	1268	743	656	720	999	263	1304	1547	1677	1170	1490	948	4096	1830	1574	2108	1938	2268	700	671	1580	753	1176	1782	2487	576	545	328	1515	1832	565
ENSGALG00000010843	398	450	613	348	254	267	135	121	159	1321	586	772	136	91	83	505	519	457	68	67	102	701	610	722	118	68	235	373	486	297	141	176	87	522	555	570	93	154	98	682	486	638	148	158	101
ENSGALG00000040000	56	74	54	45	31	43	19	16	0	102	17	49	9	30	12	48	40	31	3	0	6	45	54	66	14	0	23	35	38	38	14	11	0	32	54	20	9	20	1	29	45	46	11	13	0
ENSGALG00000031763	210	216	284	100	159	118	33	76	56	624	399	233	31	65	27	94	212	75	45	38	51	112	93	69	54	8	86	80	135	44	22	45	12	78	83	52	57	87	50	75	71	89	36	112	72
ENSGALG00000014371	181	211	414	87	151	120	52	85	78	153	506	549	22	61	63	533	609	144	39	76	82	657	506	474	115	17	82	671	206	580	101	136	26	25	1171	41	69	60	56	35	28	260	59	58	40
ENSGALG00000032799	131	163	200	22	25	60	8	37	41	90	66	56	0	17	20	68	63	63	25	15	9	47	18	54	23	4	11	30	78	28	12	41	16	28	32	40	3	8	5	25	20	34	0	9	10
ENSGALG00000051378	40	50	13	15	15	23	0	0	20	25	0	0	0	28	0	0	0	0	0	0	0	7	0	0	8	0	0	0	10	0	0	0	0	0	0	0	0	0	0	7	0	0	0	0	0
ENSGALG00000000996	944	816	1026	591	592	654	427	599	451	868	898	1369	369	427	247	1051	886	894	280	717	300	1124	654	973	335	97	328	971	952	722	299	298	150	760	818	894	204	219	161	1107	892	760	235	279	196
ENSGALG00000032840	115	80	96	54	62	94	20	31	36	173	20	112	3	26	14	107	48	75	21	0	8	100	141	113	52	0	35	31	54	26	31	26	0	31	27	51	19	11	18	48	25	47	5	38	16
ENSGALG00000050481	25	22	11	27	8	5	7	11	0	30	2	5	6	8	2	15	0	15	12	0	2	15	4	22	3	0	8	2	7	11	3	0	0	0	9	0	11	0	6	8	9	10	11	6	0
ENSGALG00000047638	57	50	66	55	73	33	15	18	3	121	116	107	45	24	4	80	164	178	14	63	55	133	38	117	34	42	20	134	90	57	57	49	38	35	52	37	12	78	13	60	32	36	26	59	19
ENSGALG00000021724	0	0	0	1	0	0	0	0	0	0	1	0	0	0	0	0	1	0	0	0	0	0	0	0	0	0	0	1	0	0	0	0	0	0	0	0	0	0	0	0	0	0	0	0	0
ENSGALG00000005090	707	934	1055	385	375	545	200	320	409	1284	1540	1580	175	215	164	1579	906	1393	173	166	199	1184	1022	1446	234	63	278	1482	1182	1663	121	123	60	1126	1068	1100	58	135	178	1759	1680	1053	186	227	122
ENSGALG00000005084	298	390	422	76	189	171	122	126	101	492	447	359	57	84	45	653	395	544	49	87	51	390	468	671	86	35	96	522	674	542	55	94	38	375	439	306	39	59	41	664	551	468	54	126	57
ENSGALG00000005061	737	810	706	240	455	443	706	365	487	505	411	507	109	398	250	607	462	457	377	451	269	503	545	637	463	51	341	409	700	365	380	417	163	604	646	784	137	242	98	688	664	584	162	261	138
ENSGALG00000040380	85	72	73	48	73	46	25	41	40	72	41	90	30	23	9	43	41	23	19	13	11	41	47	26	16	0	5	35	18	24	18	9	9	20	26	3	5	13	26	31	16	6	18	27	3
ENSGALG00000051839	3	3	1	0	2	13	0	1	3	1	3	10	0	0	0	10	3	2	0	5	1	23	6	1	2	3	5	1	8	8	3	2	6	8	1	5	1	4	1	1	0	2	2	1	1
ENSGALG00000025958	4	4	0	0	0	1	0	2	3	1	6	3	9	1	3	18	6	7	5	5	0	48	7	3	1	2	1	1	5	1	3	1	1	16	0	8	1	1	0	9	0	0	1	0	0
ENSGALG00000053144	5	4	6	0	1	5	0	2	5	3	9	13	8	0	0	29	7	3	1	9	1	83	13	6	3	6	4	3	15	8	8	4	7	22	6	19	2	12	2	5	0	0	8	2	2
ENSGALG00000054015	216	223	259	41	53	62	24	75	82	76	45	103	14	14	29	19	15	14	0	6	2	27	12	11	0	11	6	4	5	0	0	0	0	5	8	0	7	0	0	16	2	10	0	0	0
ENSGALG00000021775	1	1	0	0	0	1	0	0	0	0	0	0	0	0	0	0	0	0	0	0	0	0	0	0	0	0	0	0	0	0	0	0	0	0	0	0	0	0	0	0	0	0	0	0	0
ENSGALG00000011671	13	18	17	2	3	4	0	0	0	4	0	0	2	0	0	0	0	5	0	0	4	0	0	0	2	0	0	0	0	0	0	0	0	0	5	0	0	0	0	0	3	4	0	0	0
ENSGALG00000050077	5	0	0	0	0	0	0	2	0	11	0	15	0	0	0	0	4	14	0	0	0	5	0	15	0	0	0	0	5	0	3	2	0	3	0	0	0	0	0	0	0	0	0	0	0
ENSGALG00000050076	0	0	0	0	0	0	0	0	0	4	0	0	0	0	0	0	0	4	0	0	0	0	0	0	0	0	0	0	0	0	0	0	0	0	0	0	0	0	0	0	0	0	0	0	0
ENSGALG00000050073	0	0	0	0	0	0	0	4	0	0	0	0	0	0	0	0	0	0	0	0	0	0	0	0	0	0	0	0	0	0	0	0	0	0	0	0	0	0	10	0	0	0	0	0	0
ENSGALG00000050072	0	2	18	0	8	9	0	8	6	0	25	0	5	0	0	0	25	3	0	1	0	16	8	16	2	0	0	17	0	15	2	6	13	9	6	8	6	3	5	14	0	0	5	5	3
ENSGALG00000050070	0	0	2	0	0	0	0	0	0	0	0	0	0	0	0	0	0	0	0	0	0	0	0	0	0	0	0	0	0	0	0	0	0	0	0	0	0	0	0	0	0	0	0	0	0
ENSGALG00000051408	0	0	0	0	0	0	0	0	0	0	0	0	0	0	0	0	0	0	0	0	0	0	0	0	0	0	0	0	0	0	0	0	0	0	2	0	0	0	0	0	0	0	0	0	0
ENSGALG00000007205	1445	1946	3146	3473	3076	3346	10255	7189	6836	2296	5516	4098	3169	1576	985	2871	2370	3295	475	1938	1522	3356	3290	3391	864	639	983	3205	2609	3651	547	558	1942	3019	3334	6108	1032	757	2177	4344	3941	3191	803	940	531
ENSGALG00000004629	394	499	384	310	247	310	250	181	191	237	113	198	195	212	179	175	177	175	120	45	167	227	262	248	150	111	148	192	243	206	186	186	291	106	201	129	234	213	152	163	160	143	138	203	140
ENSGALG00000021128	6048	7275	12318	3714	4051	3955	537	767	974	683	354	924	449	247	240	146	266	231	37	20	109	450	512	679	85	174	197	370	494	395	340	238	171	254	436	366	73	74	36	383	105	142	63	48	15
ENSGALG00000004557	515	650	796	439	502	583	480	594	509	584	839	716	380	357	214	825	674	570	170	280	459	834	753	885	269	179	206	670	468	581	215	322	357	605	596	554	360	382	408	789	645	640	298	425	390
ENSGALG00000004530	93	74	77	330	200	252	393	192	187	33	47	38	386	475	164	34	45	65	68	122	98	60	24	50	215	174	115	139	50	105	254	361	524	41	35	15	271	249	428	65	74	43	143	359	385
ENSGALG00000040770	11005	11256	14225	11113	11855	13404	6671	8473	6049	8466	4101	8327	3045	3631	3116	8255	5690	6414	1602	1218	1655	7040	6150	8609	2022	928	2595	5586	4856	5605	1984	1299	999	4349	5195	4529	967	1021	989	5480	5850	6217	1046	1684	922
ENSGALG00000010497	121	157	241	60	107	120	36	50	34	51	59	67	40	19	28	73	67	76	30	14	20	66	52	48	43	16	28	14	28	49	37	15	20	28	29	44	4	31	12	24	16	25	12	25	22
ENSGALG00000031714	4	9	18	14	2	10	0	4	0	31	3	25	0	0	0	3	8	9	2	0	0	2	0	2	0	0	0	5	4	2	0	0	0	2	13	10	0	2	0	2	2	3	0	9	4
ENSGALG00000053225	5049	5090	3065	5288	6087	6062	3166	2905	2438	3193	903	1993	1041	1584	1117	2413	1854	1898	479	172	479	2200	2450	2717	587	348	756	1482	1579	1699	541	374	357	607	1501	773	343	448	414	734	1024	1005	270	486	227
ENSGALG00000009621	147457	157446	167149	54985	61306	71329	28699	37922	29724	137976	103633	153054	20673	16816	20447	123608	96781	145661	12217	20982	13932	120869	121303	118551	15306	16405	27819	140643	194805	157121	43065	46655	34911	153693	173030	176772	11414	31387	20022	235651	85023	181003	34045	40160	13571
ENSGALG00000004611	337	394	246	209	234	350	117	91	141	338	84	254	135	110	64	211	170	127	62	31	79	226	185	167	101	104	81	164	224	303	120	113	124	143	152	127	82	112	142	129	106	115	65	106	113
ENSGALG00000008498	0	0	1	0	2	0	4	2	0	7	0	9	0	0	0	3	2	4	0	0	0	29	4	0	0	0	4	9	2	11	0	0	0	13	3	4	0	2	0	9	37	11	0	0	0
ENSGALG00000054318	0	0	2	0	0	0	0	0	0	0	0	0	0	0	0	0	0	0	0	0	0	0	0	0	0	0	0	0	0	0	0	0	0	0	0	0	0	0	0	0	0	0	0	0	0
ENSGALG00000054316	18	3	0	0	0	0	0	0	0	0	0	0	0	0	2	0	5	0	0	0	0	2	0	0	0	0	0	6	0	0	0	0	0	2	4	0	0	0	0	0	0	0	0	0	0
ENSGALG00000054315	0	8	0	0	0	0	0	0	0	0	0	0	0	0	0	0	0	0	0	0	0	0	7	0	0	0	0	0	0	0	4	0	0	4	0	0	0	0	0	0	0	0	0	0	2
ENSGALG00000010961	5554	6508	7606	2957	3343	3109	1265	3209	1789	1328	1238	1708	1129	1640	1236	1038	897	968	471	411	660	526	484	784	835	79	307	278	268	261	183	135	52	202	224	189	74	181	76	253	337	167	117	209	73
ENSGALG00000010973	4620	5767	7688	2234	2832	2724	1332	1268	1494	3352	2502	3387	374	1376	1180	3487	1933	2775	692	837	914	2862	2557	3839	1190	253	1274	2069	2130	2158	940	1122	310	2028	1707	2363	884	918	810	2597	2511	2437	1274	1063	1056
ENSGALG00000010976	945	898	1185	481	632	616	463	467	512	1239	49	1026	39	1035	641	205	738	1018	450	477	479	1092	1134	1555	132	119	792	1301	274	1366	52	547	175	1115	219	1291	54	950	525	1595	199	1302	650	869	720
ENSGALG00000010983	0	0	8	0	0	0	0	0	0	47	19	82	0	0	0	12	5	29	0	0	4	59	39	0	0	0	3	14	80	0	0	0	0	21	277	8	0	0	0	0	286	33	0	0	0
ENSGALG00000010938	168	844	172	548	674	266	423	163	363	1267	148	857	233	365	182	940	630	664	339	343	208	723	647	1096	70	60	304	451	366	492	203	239	87	323	349	551	277	315	266	443	386	107	370	387	247
ENSGALG00000010942	269	316	357	115	118	173	129	103	151	804	418	392	249	198	92	202	125	159	104	243	190	184	101	128	195	224	149	119	182	106	205	292	342	189	184	230	197	185	258	199	234	200	246	211	235
ENSGALG00000010949	34	6	776	8	4	6	43	0	4	2362	1269	5213	26	8	0	1650	1155	4939	0	2	2	3747	2136	638	0	4	0	1857	1792	497	2	8	0	60	75	214	0	0	0	242	502	194	0	0	0
ENSGALG00000010954	1071	1265	1503	1038	796	1015	1269	1126	993	963	654	895	591	1260	652	723	429	657	784	1176	887	641	448	649	1039	296	943	549	587	650	506	1264	395	380	409	424	1323	1085	848	558	584	439	1374	1481	1068
ENSGALG00000010988	824	906	552	591	401	730	101	125	107	200	78	208	34	68	46	37	55	44	8	0	19	17	29	30	48	2	31	22	73	22	13	39	8	8	16	12	14	3	13	9	16	20	8	5	3
ENSGALG00000010997	542	92	709	296	423	403	122	130	151	366	376	391	163	221	104	324	302	328	41	94	119	411	253	594	183	61	237	245	361	289	66	125	78	120	261	175	29	88	57	12	150	124	61	46	32
ENSGALG00000047069	0	0	0	4	0	0	0	0	0	0	0	0	0	0	0	0	0	8	0	0	0	0	0	0	0	0	1	0	7	2	2	0	0	2	0	5	5	2	5	0	0	0	0	0	0
ENSGALG00000016941	63	48	57	23	39	35	4	8	4	0	3	0	3	7	3	3	3	0	0	0	4	4	0	0	0	2	0	0	0	0	3	5	0	0	4	0	0	0	0	2	8	0	0	0	0
ENSGALG00000016943	0	0	0	0	0	0	0	2	2	2	0	0	0	6	0	0	0	0	4	0	0	0	0	0	0	0	0	0	0	0	0	0	0	0	0	0	0	0	0	0	0	0	0	0	0
ENSGALG00000031578	2	0	5	0	2	0	0	0	0	0	0	0	0	0	0	0	0	0	0	0	0	0	0	0	0	0	0	0	0	0	0	0	0	11	9	2	0	0	0	0	0	0	0	0	0
ENSGALG00000000808	6	18	0	0	0	0	0	0	0	0	0	0	0	0	0	0	0	0	0	0	0	0	0	0	0	0	0	0	0	0	0	0	0	0	0	0	4	0	0	0	0	0	0	0	0
ENSGALG00000013738	547	688	1008	576	646	838	1360	813	818	3532	2110	4468	1235	1690	816	4714	2262	4266	1465	2666	2411	3767	3690	4615	3652	815	2276	4231	4230	4679	1753	2655	1074	3852	3932	3699	2382	2417	2358	4394	5606	4520	2925	4191	4483
ENSGALG00000030140	102	77	82	39	65	58	10	19	11	224	68	122	0	47	0	59	23	14	22	6	18	22	15	13	13	20	12	32	77	32	8	8	8	11	22	19	18	36	6	32	26	19	18	26	11
ENSGALG00000035636	74	122	82	103	384	481	0	3	619	533	438	1597	164	7	338	168	192	730	0	0	22	248	545	392	155	0	0	317	21	485	95	0	193	43	138	37	29	256	278	3	6	42	0	288	18
ENSGALG00000034198	462	413	433	58	111	126	29	38	71	149	17	139	29	35	27	0	15	29	37	24	36	29	11	37	28	14	24	30	33	19	28	51	21	9	2	6	24	76	17	10	2	11	19	41	33
ENSGALG00000003408	286	452	531	281	299	385	246	249	165	481	448	473	195	158	104	418	313	439	97	74	83	381	336	487	181	62	132	264	311	242	71	135	59	179	236	211	63	126	76	201	123	248	109	88	59
ENSGALG00000032335	1798	1973	6288	3127	3211	2995	1138	1343	1505	839	1661	1343	881	319	220	989	1631	785	148	251	334	1494	1126	2045	190	193	290	876	655	709	305	390	927	1481	989	1540	191	358	420	1494	1465	599	603	419	167
ENSGALG00000043593	58	41	82	32	516	535	544	646	469	62	49	36	407	591	358	92	40	834	250	532	3	1081	616	99	474	150	387	748	698	5	280	364	212	745	671	991	312	13	382	1183	965	1389	538	420	416
ENSGALG00000006682	1112	1289	1361	924	1121	1334	698	1051	805	3174	2544	3742	425	673	517	1555	1197	2051	790	1110	1152	1559	829	1464	979	256	1292	1902	1520	2002	661	1053	388	1036	889	1069	1223	1014	1132	1605	1091	1087	1043	1287	1296
ENSGALG00000054941	23	28	24	16	10	29	10	4	2	25	12	35	0	0	4	8	7	16	4	15	5	5	8	10	35	0	4	4	7	7	3	11	0	3	4	3	0	4	0	0	2	2	6	0	0
ENSGALG00000025462	2	4	3	0	2	2	3	2	0	5	5	4	0	0	2	2	3	1	0	0	1	3	2	4	4	1	0	2	2	3	2	1	0	3	2	1	0	3	0	0	0	2	0	0	0
ENSGALG00000003272	1352	1451	1766	804	892	1131	510	911	728	531	419	472	348	458	285	303	339	282	114	308	288	305	276	336	226	57	239	211	236	233	146	260	172	223	186	256	280	262	228	289	245	163	247	304	269
ENSGALG00000003287	519	350	488	334	316	205	173	122	223	237	178	109	224	179	102	346	223	228	68	110	97	299	181	318	95	94	160	143	226	187	95	83	118	97	93	109	39	87	54	120	100	74	77	50	21
ENSGALG00000017715	87	134	99	460	274	397	614	686	439	94	132	259	173	67	20	193	1331	208	70	73	143	2273	2024	1026	107	90	209	368	166	761	412	112	1026	1205	511	1911	348	295	623	378	353	347	206	115	276
ENSGALG00000040519	1096	1297	1761	1223	1195	1414	842	1193	727	1393	2338	2380	955	507	215	2770	1963	2025	318	840	271	3104	2125	2579	386	627	536	2490	2268	2142	586	560	831	2421	2077	3090	563	563	575	3438	2397	1901	634	667	598
ENSGALG00000026836	340	288	455	218	575	507	166	285	212	86	217	373	62	85	35	41	114	60	19	21	64	127	149	97	10	12	16	68	43	21	5	19	32	41	76	117	15	16	10	101	59	40	31	30	13
ENSGALG00000033989	779	854	1441	710	1063	1107	664	846	533	380	382	521	346	341	182	252	234	493	236	211	216	232	326	310	322	215	199	400	263	287	343	231	389	250	278	459	138	203	129	216	423	409	141	204	130
ENSGALG00000052001	6	0	0	0	0	0	0	0	0	0	0	0	0	0	0	0	0	0	0	0	0	0	0	0	0	0	0	0	0	0	0	0	0	0	0	0	0	0	0	0	0	0	0	0	0
ENSGALG00000046652	0	0	0	0	0	0	0	0	0	0	0	0	0	0	0	0	0	0	9	2	3	0	0	0	7	0	0	0	0	0	1	0	0	0	1	0	0	0	0	0	0	0	0	0	0
ENSGALG00000046657	0	0	2	0	0	0	0	0	0	0	0	1	0	0	0	0	0	0	0	0	0	0	0	5	0	0	0	2	0	0	0	0	0	0	2	0	0	0	0	0	0	0	0	0	0
ENSGALG00000047520	0	0	0	0	0	0	0	0	0	0	0	0	0	0	0	0	0	0	0	0	0	0	0	0	0	0	0	0	0	0	0	0	0	3	0	0	0	0	0	0	0	0	0	0	0
ENSGALG00000047523	10	14	14	0	2	4	0	0	0	6	0	13	4	0	0	6	8	5	0	0	0	0	0	4	3	0	0	0	0	0	2	0	0	0	0	0	0	0	0	0	9	0	0	0	0
ENSGALG00000047522	0	0	0	0	0	0	0	0	0	0	0	0	0	0	0	0	0	0	0	0	0	0	0	0	0	0	0	0	0	0	0	0	0	7	7	12	0	0	0	0	0	0	0	0	0
ENSGALG00000047525	0	2	6	0	16	0	0	0	0	0	0	0	0	10	0	0	2	0	2	0	0	0	0	5	4	0	0	0	0	0	0	0	0	0	0	0	0	0	0	0	0	0	0	0	0
ENSGALG00000047527	0	0	0	0	0	0	0	5	0	7	0	0	5	0	0	0	0	0	0	0	0	0	0	0	0	0	0	0	0	0	0	0	4	0	0	0	0	0	0	0	0	0	0	0	0
ENSGALG00000047528	0	0	0	0	0	1	0	0	0	0	0	0	1	0	0	0	0	0	0	0	2	0	0	0	0	0	0	0	0	0	0	0	1	0	0	1	1	0	0	0	0	1	0	0	1
ENSGALG00000028476	0	0	0	0	0	0	0	0	0	0	0	0	0	0	0	0	0	0	0	0	0	0	0	0	0	0	0	0	0	0	0	0	0	0	2	0	0	0	0	0	0	0	0	0	0
ENSGALG00000028478	0	0	0	0	0	1	0	0	0	0	0	4	0	0	0	0	0	0	0	0	0	0	0	0	0	0	0	0	0	0	0	0	0	0	0	0	0	0	0	4	0	2	0	0	0
ENSGALG00000051066	1	1	0	1	1	0	0	0	0	0	0	0	0	0	0	0	0	0	0	0	0	0	0	0	0	0	0	0	0	0	1	1	0	0	0	0	0	0	0	0	0	0	0	0	0
ENSGALG00000051064	0	0	0	0	0	0	0	0	0	4	4	0	0	0	0	0	0	0	0	0	0	0	0	0	0	0	0	0	0	0	0	0	0	0	0	0	0	0	0	0	0	0	0	0	0
ENSGALG00000051063	0	0	0	0	0	3	0	3	0	10	0	6	9	0	0	4	0	8	0	0	0	0	0	0	0	0	0	2	0	0	0	2	0	0	4	13	0	0	4	0	21	8	0	3	4
ENSGALG00000051062	0	15	25	0	0	0	0	0	0	0	0	0	0	0	3	0	0	0	3	0	0	11	3	14	0	0	0	0	0	0	0	0	0	0	0	15	0	0	1	0	6	0	0	0	0
ENSGALG00000051061	2	7	4	2	5	0	0	0	0	0	0	0	0	0	0	0	0	0	0	0	0	0	0	0	0	0	0	0	0	0	0	0	0	0	0	0	0	0	0	0	0	0	0	0	0
ENSGALG00000051060	0	0	0	0	0	0	0	0	0	2	0	0	0	0	0	0	0	0	0	0	0	0	0	0	0	0	0	0	0	0	0	0	0	0	0	0	0	0	2	0	0	0	6	0	0
ENSGALG00000049294	0	7	0	0	0	0	0	0	3	3	0	0	0	10	0	9	0	0	0	0	0	0	7	0	0	0	0	0	0	0	0	10	0	7	0	0	0	3	0	0	0	0	0	0	22
ENSGALG00000049297	3	4	5	0	0	0	0	3	0	0	0	8	0	2	5	0	0	0	0	0	0	0	0	0	0	0	0	0	0	0	0	0	0	0	0	0	0	0	0	0	0	0	0	0	0
ENSGALG00000049296	0	6	3	0	0	0	0	0	0	2	8	0	5	0	0	0	0	2	0	0	0	0	0	11	0	0	0	0	2	0	0	0	0	5	0	0	0	0	0	0	0	0	0	0	0
ENSGALG00000049291	0	0	0	6	0	0	0	0	0	0	0	0	0	0	0	0	0	0	0	0	0	0	0	0	0	0	0	0	0	0	0	0	0	0	0	0	0	0	0	0	0	0	0	0	0
ENSGALG00000049745	0	0	0	0	0	0	0	0	0	0	0	0	0	0	0	0	0	0	0	0	0	0	0	0	0	0	0	0	0	0	0	0	0	0	0	0	0	0	2	0	0	0	0	0	0
ENSGALG00000049742	0	0	0	0	0	0	0	0	0	2	0	0	0	0	0	0	0	0	0	0	0	0	0	0	0	0	0	0	0	0	0	0	0	0	0	0	0	0	0	0	0	0	0	0	0
ENSGALG00000049748	0	0	0	0	0	0	0	0	0	1	0	0	0	0	0	0	0	0	0	0	0	0	0	0	0	0	0	0	1	0	0	0	0	0	0	0	0	0	0	0	0	0	0	0	0
ENSGALG00000005821	35	50	11	23	25	23	26	8	15	20	0	12	12	21	9	16	16	9	5	0	4	19	28	6	17	8	15	7	19	16	9	15	0	0	11	3	7	9	10	11	9	10	10	9	2
ENSGALG00000005814	290	250	149	1637	968	1296	3098	1072	1906	459	106	166	1017	1269	1162	511	408	299	420	95	430	591	600	432	1222	333	559	624	712	932	315	362	319	276	384	151	576	396	410	609	357	191	357	438	280
ENSGALG00000030118	71	31	69	32	64	60	40	28	13	39	52	47	30	25	7	8	60	64	19	26	11	53	38	57	27	6	9	58	33	41	18	18	32	38	24	28	17	14	24	37	25	24	22	22	15
ENSGALG00000050115	2	1	2	1	2	2	0	1	1	2	1	1	1	0	0	1	1	1	0	0	0	2	1	0	0	0	0	0	1	0	0	0	1	0	1	0	0	1	0	1	1	1	0	1	1
ENSGALG00000032172	0	0	0	0	0	0	0	0	0	0	0	0	0	0	0	0	0	0	0	0	0	0	0	0	0	0	0	0	0	0	0	0	0	0	0	0	0	0	2	0	0	0	0	12	0
ENSGALG00000035981	4	12	3	19	20	23	17	2	13	3	0	5	13	16	0	6	0	0	0	2	4	0	0	0	5	0	0	0	0	0	0	0	5	0	0	0	0	3	11	0	0	0	6	13	7
ENSGALG00000044501	0	0	10	68	35	36	3	5	9	0	0	6	8	3	0	0	0	2	0	0	0	0	0	2	0	0	5	3	2	0	0	0	0	0	4	3	0	0	0	0	7	3	0	2	0
ENSGALG00000037111	0	0	3	0	0	0	0	0	0	3	0	0	0	0	0	4	3	0	0	0	0	0	0	0	0	0	0	0	0	0	0	0	0	0	3	0	0	0	0	0	0	0	0	0	0
ENSGALG00000045636	45	50	33	129	117	192	429	445	251	257	142	295	123	208	85	301	408	874	314	283	233	442	460	488	410	449	873	644	1010	655	1089	841	440	238	247	206	398	350	624	527	234	129	474	355	224
ENSGALG00000049916	14	25	28	4	62	29	0	2	0	62	21	71	15	8	0	135	172	147	4	14	8	84	91	141	6	11	38	90	134	80	11	37	35	81	76	158	5	46	7	145	75	93	29	53	0
ENSGALG00000049564	111	215	206	298	377	349	231	369	243	1149	2123	1510	616	701	191	492	749	708	238	395	680	1479	458	707	536	698	269	804	363	327	477	507	351	825	1634	594	445	1282	400	1040	2230	712	486	621	474
ENSGALG00000043012	0	2	3	0	3	1	0	1	0	14	0	3	0	0	0	6	7	11	1	2	0	2	3	2	0	72	48	0	21	13	36	57	42	2	5	4	9	26	3	8	1	8	29	43	0
ENSGALG00000046336	15	7	26	21	10	9	4	2	7	8	32	8	1	8	1	6	9	2	0	0	1	4	2	5	0	0	0	4	3	0	0	1	0	2	1	0	0	0	0	0	4	0	0	0	0
ENSGALG00000047671	0	0	12	0	2	0	0	0	7	17	0	3	0	0	0	0	6	0	0	0	0	0	0	26	0	0	0	12	0	0	0	0	0	5	0	0	3	0	0	0	0	3	0	0	0
ENSGALG00000052217	5	5	0	5	6	5	0	0	3	6	17	15	2	0	0	27	35	29	0	0	5	31	27	22	2	0	9	32	25	23	16	6	8	7	18	40	10	10	0	19	0	26	0	6	0
ENSGALG00000051284	0	0	0	0	3	0	0	0	0	13	6	16	2	0	0	20	46	40	0	0	4	4	19	28	5	6	0	13	15	3	7	0	2	16	38	23	0	2	6	28	30	8	0	15	4
ENSGALG00000052671	9	32	33	0	9	10	0	5	0	0	0	0	0	0	0	0	0	0	0	0	0	0	0	0	0	0	0	0	0	0	0	0	0	18	15	12	3	8	0	0	0	0	0	0	0
ENSGALG00000047133	0	0	7	2	4	4	0	0	0	0	0	0	0	0	0	0	0	0	0	0	0	0	0	25	0	0	6	0	0	0	0	0	0	30	31	13	7	16	67	0	0	0	0	0	0
ENSGALG00000050335	5	2	6	0	1	0	1	2	0	0	14	0	1	0	0	3	0	0	0	0	0	0	0	0	0	0	0	1	0	0	0	0	0	1	0	0	0	1	0	0	0	3	0	1	0
ENSGALG00000050331	0	0	0	0	0	0	0	0	0	0	0	8	0	0	0	0	0	0	0	0	0	0	0	0	0	0	0	0	0	0	0	0	0	0	0	0	0	0	0	0	0	0	0	0	0
ENSGALG00000050333	3	0	0	0	0	0	0	0	0	0	0	0	0	0	0	0	0	0	0	0	0	0	0	0	0	0	0	0	0	0	0	0	0	6	2	0	0	0	0	0	0	0	0	0	0
ENSGALG00000054378	12	7	28	7	23	18	2	21	24	61	25	44	3	2	7	17	14	18	0	0	0	17	16	0	0	0	2	7	10	13	3	0	0	5	10	11	0	0	0	0	7	3	0	3	0
ENSGALG00000038873	12	16	15	9	6	13	2	0	0	12	15	10	0	6	0	21	8	9	0	0	2	8	0	8	2	0	0	8	6	9	10	0	0	2	4	0	0	0	0	0	4	4	0	0	0
ENSGALG00000051523	0	0	0	0	0	0	0	0	0	0	0	0	0	0	0	0	0	0	0	0	0	0	0	0	0	0	0	0	1	0	0	0	0	0	0	0	0	0	0	0	0	0	0	0	0
ENSGALG00000003011	46	36	106	97	53	84	74	144	65	339	161	109	35	58	34	18	61	21	12	23	12	64	8	12	21	7	28	42	6	24	10	26	0	0	0	4	20	39	20	15	7	8	109	95	108
ENSGALG00000027190	509	786	812	507	518	629	446	396	391	348	317	372	245	408	266	381	270	320	160	374	287	363	290	447	266	93	278	301	410	328	218	465	211	228	315	322	428	295	284	321	293	233	416	409	398
ENSGALG00000003033	438	660	261	165	155	210	55	76	79	239	10	227	30	14	28	636	163	178	18	4	34	331	379	404	28	8	46	470	718	505	26	28	2	509	1412	281	14	33	17	975	1020	403	10	50	19
ENSGALG00000002932	4510	5408	10533	6390	6118	6968	4032	3975	5369	3222	5815	6349	8056	3899	2886	3203	2332	3051	2284	6119	2734	3164	2627	3587	3188	3963	5147	2676	2493	2685	2402	2732	3612	2571	2200	3715	2505	2311	3606	3201	2526	2415	2430	2200	1788
ENSGALG00000002954	3029	2950	3173	1686	1831	1894	1113	1482	1042	1742	1289	1229	425	1442	789	2434	1234	1387	541	482	632	1619	1780	2540	818	162	826	1162	951	1371	575	667	135	1077	1017	1197	399	617	559	840	1064	1133	427	446	325
ENSGALG00000002985	98	91	378	198	247	280	162	187	125	70	222	75	71	21	9	79	169	98	2	10	54	141	165	251	8	4	38	199	53	165	4	14	38	76	142	94	60	79	32	58	105	88	33	72	53
ENSGALG00000002993	273	533	690	107	98	204	24	14	33	9	32	4	1	6	0	6	4	4	0	0	4	7	10	0	18	0	0	19	31	27	2	0	0	59	33	40	4	4	2	32	7	28	5	6	0
ENSGALG00000042548	17	24	14	5	11	27	0	4	0	35	26	5	5	0	0	0	0	0	0	5	5	5	0	0	0	0	0	5	0	0	0	0	0	5	0	3	0	0	0	0	0	0	0	0	0
ENSGALG00000032066	0	0	0	6	5	0	0	0	0	8	8	6	0	3	0	9	0	3	0	2	0	11	2	5	5	0	0	0	0	0	0	0	6	6	4	0	0	2	0	0	0	0	2	0	0
ENSGALG00000006515	2	0	0	0	0	0	0	0	0	0	0	0	0	0	0	0	0	0	0	0	0	0	0	4	0	0	0	0	0	2	0	0	0	0	2	0	0	0	0	0	0	0	0	0	0
ENSGALG00000024565	27	18	31	5	10	7	5	6	8	19	16	11	4	1	6	16	21	13	3	1	4	11	10	24	7	0	7	15	7	5	5	0	4	4	7	13	0	2	0	3	3	14	3	4	2
ENSGALG00000029330	544	701	1388	1001	1048	1144	1350	1378	1727	593	1484	1194	2252	656	551	870	1071	909	910	2115	1135	714	609	954	1359	1818	1498	714	669	854	1182	1640	2985	1283	839	1743	1813	1382	2519	1368	1314	871	1109	1973	1091
ENSGALG00000039160	874	1217	1261	910	1140	1034	781	888	712	408	535	566	817	343	242	749	764	701	263	593	404	754	522	759	553	428	359	338	495	516	694	357	1039	405	353	622	394	388	463	550	424	399	436	597	474
ENSGALG00000042804	375	456	685	462	479	495	364	376	310	271	201	224	264	160	61	223	235	145	76	46	90	406	308	452	96	91	73	253	165	269	129	126	237	233	287	399	127	177	168	219	293	192	135	203	146
ENSGALG00000037879	188	216	1058	639	694	649	311	508	345	72	647	126	417	40	38	123	419	116	30	53	204	519	335	564	36	26	41	428	63	351	31	48	288	382	325	574	149	174	167	461	344	323	182	192	153
ENSGALG00000050372	12	8	30	8	23	3	6	4	19	2	13	1	6	10	4	4	8	1	3	6	13	8	2	4	0	5	0	1	0	4	1	2	13	0	3	5	6	3	33	0	2	2	0	0	4
ENSGALG00000048331	0	0	368	373	530	334	187	210	142	0	78	0	303	0	0	0	113	0	0	0	159	221	138	175	0	0	0	142	0	204	0	0	372	51	111	178	67	123	110	114	74	62	65	189	104
ENSGALG00000038667	254	327	1206	760	678	692	1208	1163	1136	244	1400	624	1329	348	214	368	898	379	143	1059	759	686	677	1042	350	318	233	695	198	800	229	496	2014	667	508	933	1183	865	1647	1019	796	588	1012	1047	817
ENSGALG00000031328	276	333	624	275	308	313	213	260	236	338	219	236	311	105	64	139	249	142	69	65	89	241	226	341	78	137	77	180	122	130	131	88	183	130	173	265	75	108	123	186	176	103	142	133	64
ENSGALG00000029691	110	155	721	847	808	745	1045	1294	1012	39	990	148	782	88	40	103	588	98	61	159	717	584	274	738	86	184	86	619	53	664	116	141	1714	626	614	832	1068	746	1165	869	691	558	739	1349	395
ENSGALG00000035641	26	31	98	55	71	57	45	39	11	6	6	7	33	6	1	3	18	3	0	2	13	13	14	18	8	2	0	27	1	7	4	4	33	4	12	33	7	5	0	14	16	16	5	15	13
ENSGALG00000014226	311	377	210	129	144	177	46	47	49	262	192	192	38	55	34	237	134	152	40	15	25	201	192	120	45	9	50	243	265	210	23	48	19	160	372	136	98	109	61	137	141	104	127	131	110
ENSGALG00000014222	3204	1179	639	1235	1602	2164	734	1192	1013	843	1393	2223	376	371	857	610	529	310	229	584	598	1860	437	2225	310	158	278	485	2156	533	940	393	288	1777	2210	2846	502	424	1170	2414	619	635	970	443	668
ENSGALG00000019261	0	0	0	0	2	0	0	8	0	52	4	64	6	17	6	38	47	33	2	0	11	27	49	129	16	6	21	16	85	56	5	70	15	16	41	74	13	19	46	34	22	31	29	15	27
ENSGALG00000014234	25	258	268	71	86	84	58	83	79	103	90	126	22	99	59	115	59	147	31	68	65	87	70	137	141	12	97	92	97	54	63	81	39	189	113	78	158	114	110	136	80	1	207	119	233
ENSGALG00000053735	0	4	20	0	2	0	0	0	0	4	0	9	0	0	0	0	4	0	0	2	0	2	0	0	0	0	2	0	0	0	0	0	0	0	0	0	0	0	0	7	0	0	0	0	0
ENSGALG00000014232	5	9	3	0	0	5	0	0	0	87	15	13	0	0	0	0	0	4	0	0	0	0	0	0	0	0	0	0	0	0	2	0	0	0	0	0	0	0	0	0	0	0	4	0	0
ENSGALG00000053512	9	11	13	0	0	0	0	4	0	11	4	0	0	0	0	4	0	0	3	3	4	0	0	0	0	0	0	3	0	0	6	0	0	5	0	0	0	3	0	0	7	0	0	0	0
ENSGALG00000049702	14	7	113	8	0	21	0	0	0	38	0	9	4	0	0	37	0	37	0	0	14	0	0	45	0	0	6	0	0	0	0	0	0	7	0	0	0	0	0	0	0	33	0	0	7
ENSGALG00000025541	12	7	14	4	9	9	3	10	6	28	15	33	6	3	9	18	12	17	5	4	3	24	26	21	13	0	7	8	12	11	7	6	3	13	6	16	2	5	7	11	23	11	10	9	4
ENSGALG00000013990	111	161	191	39	199	131	59	206	100	95	125	150	64	127	78	193	78	32	23	206	162	47	90	129	94	269	225	81	160	85	82	148	131	67	63	130	69	89	173	110	104	71	42	109	63
ENSGALG00000024890	7	4	9	2	3	3	1	4	3	5	4	6	0	0	1	5	4	1	1	1	0	3	3	6	3	0	1	1	1	4	1	3	0	1	3	4	0	2	0	0	4	1	1	1	2
ENSGALG00000025337	5	5	6	0	2	6	0	0	3	19	0	9	0	4	0	14	7	11	0	3	1	6	11	2	4	0	0	16	9	3	2	4	0	4	7	3	1	1	3	7	2	4	1	4	0
ENSGALG00000048790	0	3	0	4	15	8	4	0	2	15	10	19	0	0	2	4	8	6	0	6	0	8	9	13	0	0	2	8	4	0	10	2	2	0	0	2	0	4	0	0	2	6	0	0	0
ENSGALG00000029024	14	21	52	39	26	67	7	0	10	659	847	847	5	5	0	1144	588	665	0	0	4	993	1459	1780	2	0	16	410	613	578	2	11	9	304	317	489	0	11	2	459	292	198	13	0	4
ENSGALG00000053921	333	98	138	123	95	59	27	35	66	4181	444	555	20	13	141	56	342	40	19	6	8	41	28	44	260	0	16	26	22	46	19	13	6	42	4190	51	7	1830	4	41	18165	33	30	20234	14
ENSGALG00000031656	1009	817	750	529	762	535	275	226	220	68	45	74	96	576	323	118	54	98	285	301	217	49	101	24	683	84	364	41	97	101	262	371	117	77	62	9	360	372	315	86	137	105	468	448	459
ENSGALG00000013993	161	150	180	1580	1389	1038	509	1206	189	818	276	1261	774	387	53	873	729	414	156	248	215	561	331	494	347	49	144	362	1185	562	62	71	14	151	445	313	299	722	352	476	321	527	285	281	197
ENSGALG00000019961	173	199	199	74	63	93	64	87	42	163	85	140	45	107	45	196	94	115	36	138	39	139	72	158	24	39	37	170	124	125	20	68	39	162	105	107	73	71	25	257	124	155	67	50	57
ENSGALG00000010774	878	941	1247	426	516	552	343	406	380	461	597	441	393	296	153	467	398	382	230	384	228	313	266	471	260	119	264	332	318	295	203	242	185	302	228	437	189	164	236	423	343	319	222	296	159
ENSGALG00000010761	263	503	522	813	728	921	532	844	625	159	393	382	790	315	215	370	256	239	183	497	350	206	201	222	349	330	385	165	212	194	360	222	345	139	89	134	256	220	435	155	94	192	239	311	441
ENSGALG00000010758	1326	1296	2173	821	1006	889	465	691	590	805	869	1181	401	323	257	866	476	702	238	365	379	540	475	999	342	297	490	481	333	420	435	542	665	172	235	431	331	333	507	304	292	331	425	444	274
ENSGALG00000010752	15	9	9	7	6	5	10	9	8	21	14	18	5	0	0	6	40	21	2	5	4	41	16	30	24	2	13	0	10	4	8	0	6	18	12	21	16	4	13	5	0	25	0	14	15
ENSGALG00000010749	370	572	797	362	298	404	197	201	259	387	400	553	179	116	102	345	380	345	67	131	92	340	214	377	91	80	106	220	222	209	128	114	125	173	182	365	104	118	98	163	140	144	126	79	73
ENSGALG00000010746	1103	1205	1564	1345	1564	1418	1329	1581	1459	7324	4818	6103	603	1886	1152	4961	3096	4578	1286	1903	1815	3867	3866	5012	2541	511	1956	3947	3509	4402	1276	1801	564	2928	3090	2976	1566	1713	1351	4596	3813	3589	2361	2138	2390
ENSGALG00000020647	126	125	137	31	47	98	19	22	24	132	118	93	24	9	22	80	45	99	26	24	24	54	36	85	44	3	68	55	17	55	43	15	44	42	26	60	66	63	42	37	14	44	132	74	33
ENSGALG00000010743	358	539	567	482	326	549	239	152	195	384	235	300	240	196	87	425	234	301	217	197	124	257	309	406	175	76	287	492	254	517	210	258	170	466	386	410	404	451	519	668	727	637	733	560	560
ENSGALG00000038608	77	77	182	106	69	154	37	47	44	57	160	54	84	30	13	41	34	55	24	52	40	89	73	55	51	14	46	36	84	69	17	36	45	20	28	15	12	37	22	62	25	43	45	74	13
ENSGALG00000010736	9	0	19	0	9	5	0	3	2	9	0	0	3	0	0	3	4	0	0	0	0	0	6	0	0	0	0	8	9	3	3	0	0	5	0	3	0	0	0	0	0	4	0	0	0
ENSGALG00000026707	0	0	0	0	0	0	0	2	0	0	0	0	0	0	0	0	0	0	0	0	0	2	0	0	0	0	0	0	0	0	0	0	0	0	0	2	0	0	0	0	0	0	0	0	0
ENSGALG00000012228	27	54	23	37	31	34	13	16	11	10	0	0	0	6	0	0	11	0	0	0	0	0	0	0	0	0	0	0	6	0	0	0	0	8	0	0	0	0	0	0	0	0	0	0	0
ENSGALG00000051790	0	2	0	1	0	0	0	0	0	0	0	8	0	0	0	0	0	2	0	0	0	1	0	0	2	0	0	0	0	0	0	0	0	0	0	0	0	0	0	0	0	0	0	0	0
ENSGALG00000054159	0	6	2	0	5	9	2	10	0	0	0	0	0	0	0	0	0	0	4	2	4	5	0	0	5	0	2	0	0	0	0	0	2	0	0	1	4	6	0	2	0	0	0	0	0
ENSGALG00000054155	0	0	0	0	0	0	0	0	0	0	0	0	0	0	0	0	3	0	0	0	0	0	0	0	0	0	0	0	3	0	3	0	0	3	0	0	0	0	0	0	6	0	0	0	0
ENSGALG00000054156	0	0	0	0	0	0	0	0	0	0	0	2	0	0	0	0	0	0	0	0	0	0	10	0	0	4	0	0	2	2	0	0	0	3	4	0	0	2	0	0	3	0	0	0	0
ENSGALG00000016731	658	14	294	432	2	197	341	354	415	353	257	184	181	496	262	317	246	434	92	381	200	63	223	320	64	60	214	325	373	330	154	319	114	373	350	411	262	225	270	439	571	443	307	263	2
ENSGALG00000029012	32	24	31	35	53	59	46	37	18	35	25	34	15	18	11	21	31	62	4	4	6	48	51	28	20	13	22	34	49	35	12	14	12	31	41	60	22	27	33	35	34	35	29	17	12
ENSGALG00000016720	78	577	727	362	546	66	11	427	309	1018	1877	2410	147	227	197	3063	1647	1460	169	1	154	2938	1818	2777	273	84	351	2079	340	2748	98	267	192	3326	3048	3877	308	535	21	649	2283	773	231	410	507
ENSGALG00000055097	0	0	0	0	0	0	0	0	0	3	0	0	0	0	0	0	0	4	0	0	0	0	0	0	0	0	0	0	0	0	2	0	0	0	0	0	0	0	0	0	0	0	0	0	0
ENSGALG00000016719	1147	1405	1341	1285	1290	1650	1366	1203	1016	2455	1739	2072	1041	1613	499	2016	2259	1943	1273	931	1054	1854	1863	1973	1267	1809	1291	1309	1728	1745	1296	3438	3851	1482	2101	2018	1619	1968	2316	1760	1165	1294	1565	2810	2158
ENSGALG00000039320	178	219	128	225	191	191	550	89	250	489	253	600	79	326	122	324	244	1681	384	30	243	2441	704	1778	577	236	432	1247	1903	2498	999	1177	521	1466	1373	265	142	142	1140	809	90	834	712	62	323
ENSGALG00000033033	0	0	0	0	0	0	0	0	4	4	8	0	0	0	0	0	4	0	0	0	0	91	6	0	0	0	0	0	4	0	0	5	0	0	0	0	0	2	0	0	7	2	11	0	0
ENSGALG00000053468	0	0	0	0	2	4	0	2	0	7	0	0	0	0	0	0	3	0	2	8	4	8	3	12	1	6	6	5	0	5	8	11	53	5	0	5	24	19	74	6	0	4	33	35	37
ENSGALG00000040238	0	5	507	227	237	213	84	93	117	0	195	0	204	2	2	0	217	0	2	0	148	202	137	275	0	0	0	148	0	133	0	0	320	138	132	256	185	136	187	153	117	151	135	151	170
ENSGALG00000016713	402	521	890	272	294	479	203	330	341	1170	1000	1417	343	465	283	1440	1203	1613	359	443	246	1126	1076	1613	432	284	499	1101	1064	879	250	535	273	995	1373	726	391	567	457	929	752	722	866	840	1159
ENSGALG00000012220	393	494	545	104	99	152	29	126	116	353	214	448	60	37	62	77	41	57	35	0	12	50	37	118	21	6	13	31	73	48	16	13	11	20	24	15	3	34	4	33	6	25	8	12	7
ENSGALG00000006871	407	373	238	510	346	381	197	148	125	59	26	80	114	116	52	99	136	131	110	76	106	152	229	200	147	60	141	62	178	79	115	149	97	84	71	52	112	69	74	68	77	18	65	103	49
ENSGALG00000023032	0	0	0	0	0	0	0	0	0	161	204	148	0	0	3	34	36	200	0	0	0	6	8	20	0	0	0	15	109	332	0	0	0	7	13	47	0	0	0	6	46	36	0	0	0
ENSGALG00000014225	6	34	81	4	8	4	0	4	0	4	15	3	0	0	2	2	10	2	2	15	2	3	13	2	6	9	42	2	0	38	34	65	21	11	7	20	16	29	20	2	0	21	34	51	8
ENSGALG00000014242	60	51	68	16	11	16	10	0	7	79	8	5	4	0	0	0	11	0	4	0	0	0	0	0	0	8	4	0	0	0	0	0	0	0	0	0	0	0	0	0	0	0	0	4	0
ENSGALG00000014236	142	113	89	96	80	129	21	56	48	221	10	96	13	88	5	211	27	30	43	18	35	30	248	255	89	7	61	481	102	449	9	63	24	337	257	19	50	80	146	332	362	48	68	22	48
ENSGALG00000014248	1371	1381	1515	590	587	755	453	376	455	1418	728	1057	257	545	343	1421	901	1031	261	229	300	1287	1312	1510	393	95	357	1070	1136	1209	289	474	115	954	1283	1143	212	315	272	1068	1158	1151	271	304	299
ENSGALG00000031415	329	352	312	324	260	423	137	147	133	281	246	269	79	126	58	417	193	228	75	66	72	327	434	436	79	23	88	316	306	360	82	144	47	382	491	408	93	173	134	483	464	376	92	144	101
ENSGALG00000017025	5951	6813	5976	1273	1756	2042	640	1690	2416	2664	1125	2945	206	607	743	97	98	116	72	127	58	278	113	365	111	46	158	91	85	76	94	150	41	66	126	48	38	160	47	76	68	78	91	88	362
ENSGALG00000017026	1220	1532	1219	663	853	1154	596	394	487	1079	316	869	192	763	501	777	520	688	285	191	404	779	584	829	413	71	521	533	610	588	234	373	97	337	401	332	297	441	249	625	436	361	369	389	580
ENSGALG00000014262	420	581	244	441	344	564	232	170	179	272	94	215	53	97	79	196	139	129	99	22	42	166	329	213	108	36	134	159	336	211	94	94	11	134	168	119	92	120	136	127	86	168	60	58	40
ENSGALG00000017023	24	58	78	18	14	26	0	1	7	47	61	33	0	0	0	18	16	23	0	0	2	19	24	33	6	0	11	10	12	24	1	2	0	9	5	11	0	3	2	0	0	7	2	0	3
ENSGALG00000054610	121	140	118	11	10	17	0	0	0	0	0	0	0	0	0	0	0	0	0	0	0	0	0	0	0	0	0	0	0	0	0	0	0	0	0	0	0	0	0	0	0	0	0	0	0
ENSGALG00000017021	7	0	19	4	3	27	0	0	0	12	0	5	0	3	0	7	2	0	0	0	0	4	4	0	0	0	0	10	34	0	0	0	0	0	0	0	0	4	0	0	0	0	0	0	0
ENSGALG00000051011	171	213	145	16	0	31	0	0	0	0	6	0	0	0	0	0	0	0	0	0	3	0	12	0	0	0	0	0	6	0	0	0	0	0	0	0	0	0	0	0	0	3	0	0	0
ENSGALG00000054675	3	21	17	8	4	34	0	0	4	3	0	8	0	0	7	4	7	0	0	0	0	0	4	10	0	0	0	0	0	0	0	2	3	0	4	8	0	0	4	0	0	4	7	0	4
ENSGALG00000050758	6	0	13	0	6	2	0	0	0	37	25	18	0	0	4	21	29	31	5	0	6	7	3	30	4	0	12	0	10	27	8	12	0	11	7	0	0	6	6	19	2	15	4	4	6
ENSGALG00000048038	16	14	20	28	32	29	21	12	25	80	129	100	4	15	0	147	120	153	2	4	16	152	64	144	13	0	10	97	53	43	4	3	2	48	58	58	9	6	0	89	57	22	10	0	0
ENSGALG00000008802	0	0	0	0	0	0	0	0	0	0	0	0	0	0	0	0	0	2	0	0	0	0	0	0	0	0	0	0	0	0	0	0	0	0	0	0	0	0	0	0	0	0	0	0	0
ENSGALG00000053313	4	1	1	0	2	2	0	1	1	1	1	1	1	0	0	0	0	1	0	0	0	1	1	1	0	1	0	0	4	2	0	1	0	1	1	0	0	1	1	0	0	4	0	1	0
ENSGALG00000053312	0	0	0	0	0	0	0	0	0	0	0	0	0	0	0	0	0	0	0	0	0	0	0	0	0	0	0	0	0	0	0	0	0	4	0	0	0	0	0	0	0	0	0	0	0
ENSGALG00000053311	2	0	0	0	0	0	0	0	0	10	0	0	0	0	0	0	0	0	0	0	0	0	0	0	0	0	0	0	0	0	0	0	0	0	4	0	0	0	0	0	0	0	0	0	0
ENSGALG00000053319	9	2	9	0	0	2	0	0	0	9	12	4	0	0	0	0	0	0	4	0	2	2	0	0	0	1	0	0	0	2	4	1	0	0	2	0	9	0	0	0	0	0	0	4	0
ENSGALG00000037050	1306	2123	2322	5231	5974	7587	26904	35487	17359	23767	39653	39282	14407	3843	2583	18107	16602	34064	3961	4464	4692	25726	18066	23956	6956	3289	5320	27851	14332	24026	5125	2202	3790	15152	18799	17738	1351	2708	2153	18418	18483	12650	1017	2223	1304
ENSGALG00000021686	30	12	46	49	54	131	26	74	49	0	0	9	16	0	10	0	6	0	0	32	5	7	0	9	4	8	7	9	0	5	4	7	6	0	6	0	9	0	3	0	0	0	4	0	0
ENSGALG00000000615	459	491	821	223	342	259	139	190	192	219	204	308	321	115	75	145	114	119	99	121	109	200	175	215	101	120	116	161	124	81	174	144	166	115	64	170	150	110	202	142	94	133	151	182	184
ENSGALG00000000618	532	33	925	23	513	597	625	23	39	448	970	48	342	1	16	61	658	960	191	448	305	980	624	935	334	130	287	760	532	591	238	424	308	771	580	786	394	424	392	1	1122	894	1	3	501
ENSGALG00000000667	35	24	39	27	41	46	74	57	41	60	61	72	23	22	8	163	137	29	23	2	24	87	75	198	53	73	128	167	70	121	95	64	24	41	44	98	37	63	60	81	103	192	72	90	15
ENSGALG00000026153	166	200	281	1770	1611	1395	1267	1015	874	380	440	524	856	273	218	250	402	240	207	158	343	619	214	361	189	97	234	254	62	303	279	315	779	49	275	383	141	431	580	102	208	80	322	503	260
ENSGALG00000021685	382	444	570	557	1063	1111	1346	1367	1253	268	319	484	870	480	358	105	109	311	252	225	320	62	103	104	738	370	468	218	258	222	528	293	463	83	126	53	169	216	208	84	146	86	155	258	433
ENSGALG00000027365	1481	1784	986	721	762	1235	522	273	469	934	260	510	242	514	347	416	409	478	268	65	362	318	403	398	553	191	397	350	1435	377	594	739	241	456	664	527	278	644	347	525	437	357	272	593	200
ENSGALG00000031548	14	42	118	17	18	30	16	23	18	45	32	90	13	3	21	33	43	48	9	2	16	18	23	5	35	0	13	4	8	15	8	11	6	12	14	24	5	5	8	19	11	28	6	4	0
ENSGALG00000000672	238	242	321	363	362	584	389	287	262	233	86	299	243	293	189	295	211	170	92	57	99	342	260	261	134	109	103	195	143	258	144	96	204	137	159	169	81	101	155	214	130	181	99	112	127
ENSGALG00000008937	473	502	753	205	236	268	168	154	141	473	709	483	47	75	60	527	381	405	85	80	90	311	381	748	128	10	160	429	282	343	105	80	31	276	323	394	66	91	65	446	341	444	121	129	121
ENSGALG00000008942	690	135	186	301	200	505	231	116	247	227	71	132	149	409	67	198	233	312	50	20	140	165	156	145	176	67	319	84	166	85	188	117	16	84	141	157	36	242	80	89	95	70	86	76	31
ENSGALG00000008944	384	250	303	352	453	354	165	172	140	244	125	187	40	118	67	206	176	99	53	12	72	156	129	217	93	6	83	171	119	205	76	71	33	122	151	112	35	76	55	86	119	92	66	62	56
ENSGALG00000008957	4478	646	3274	1868	1940	330	1390	1271	1831	1907	558	1551	1148	2708	968	1417	1109	1132	655	570	1454	1377	1714	1793	1364	472	1214	1294	1294	1086	842	1507	696	670	1035	607	940	953	549	1177	866	682	817	790	483
ENSGALG00000034948	246	272	198	127	289	199	24	33	31	206	78	129	22	12	9	245	114	161	35	4	13	190	240	106	17	12	67	253	241	196	36	29	7	197	209	114	18	44	5	128	258	138	23	24	8
ENSGALG00000037375	804	798	667	348	530	554	279	234	308	1411	698	882	97	215	137	1580	866	1271	167	77	163	1734	1898	1921	197	39	223	2223	1498	2068	218	212	45	1136	1819	1081	112	227	182	1996	1932	1490	165	180	128
ENSGALG00000043013	39	62	69	55	33	26	0	9	10	13	107	20	6	7	4	45	14	48	3	8	2	7	127	88	4	3	4	6	87	47	4	11	0	0	51	30	0	8	3	0	18	19	8	7	0
ENSGALG00000047102	29	34	76	22	45	37	20	15	28	22	11	14	5	0	0	12	7	7	5	3	7	22	33	10	0	15	10	41	0	51	20	12	53	23	22	27	53	29	16	6	33	14	22	42	28
ENSGALG00000050552	193	12	386	170	335	28	261	271	225	268	529	326	118	23	93	319	25	222	24	251	33	232	214	293	26	36	17	45	4	146	4	161	469	225	145	22	106	40	31	260	190	177	108	258	175
ENSGALG00000041390	69	152	270	166	128	188	235	120	302	181	297	283	139	120	81	127	168	240	92	269	117	155	114	132	154	15	157	91	136	129	142	132	353	183	111	201	169	153	299	203	149	94	205	144	118
ENSGALG00000008930	366	387	476	174	195	267	100	208	176	7	297	539	75	74	71	414	444	413	89	67	83	327	303	545	192	18	101	294	289	171	83	161	17	308	376	258	43	110	94	229	436	195	55	195	69
ENSGALG00000008931	31	252	966	325	604	803	342	598	543	282	901	18	300	7	96	22	693	310	106	289	438	539	343	808	126	174	272	597	143	466	92	154	283	503	412	567	277	331	613	629	457	355	339	413	298
ENSGALG00000049652	0	0	0	0	0	0	0	0	0	5	0	0	0	0	0	4	0	0	0	0	0	0	120	78	0	0	0	9	0	0	0	0	0	100	0	116	0	0	0	0	4	20	0	0	0
ENSGALG00000021451	0	0	0	0	3	5	0	0	0	17	0	20	0	0	0	58	27	15	0	0	0	0	19	53	0	0	0	4	0	0	0	0	0	0	0	6	0	0	0	0	5	20	0	0	0
ENSGALG00000053446	0	0	0	0	0	0	0	0	0	0	0	0	0	0	0	6	0	3	0	0	0	6	9	39	0	0	0	3	5	0	0	0	0	202	14	114	0	0	0	0	93	255	0	0	0
ENSGALG00000052887	0	2	0	0	0	0	0	0	0	0	0	0	0	0	0	8	0	0	0	0	0	0	0	5	0	0	0	21	0	25	0	0	0	430	356	717	0	0	0	265	155	1358	0	0	0
ENSGALG00000054926	0	6	204	0	3	25	0	0	0	0	0	0	0	0	2	217	3	15	0	0	0	0	10	203	0	0	0	186	13	16	0	0	2	123	68	563	0	0	0	138	587	811	0	4	0
ENSGALG00000049254	0	0	0	0	0	0	0	0	0	0	0	0	0	0	0	8	3	0	0	0	0	0	0	30	0	0	0	0	0	0	0	0	0	50	5	43	0	0	0	16	16	61	0	0	0
ENSGALG00000030055	371	372	428	548	493	723	638	968	430	1003	649	785	222	223	169	856	262	592	138	39	122	457	1615	1159	215	134	266	374	726	165	390	220	309	32	135	670	225	220	232	325	396	106	223	203	162
ENSGALG00000001791	96	95	125	243	254	250	148	243	200	82	111	125	251	98	38	180	172	157	49	139	16	12	6	97	79	103	69	88	89	128	60	80	109	71	58	131	82	90	115	84	88	47	2	158	75
ENSGALG00000001824	33	36	96	34	40	57	26	14	18	22	16	9	0	15	15	31	19	17	4	0	0	38	31	45	3	11	0	39	20	33	12	11	8	18	12	375	0	4	0	0	75	500	0	5	7
ENSGALG00000001817	1837	3287	4795	1852	1126	1637	1761	933	1231	2832	2080	2790	439	1421	981	1568	1424	409	1043	2025	1110	1969	1572	2561	1272	422	1298	1359	832	1319	1222	1269	745	1007	963	1061	847	470	746	1277	291	1013	1179	1708	1145
ENSGALG00000015928	3	0	0	0	0	0	0	0	0	8	0	2	0	0	0	0	0	0	0	0	0	0	0	0	0	0	0	0	0	0	0	0	0	0	0	0	0	0	0	0	0	0	0	0	0
ENSGALG00000054399	51	32	63	20	27	17	0	0	10	12	0	8	0	16	3	0	3	9	7	0	7	8	6	0	8	5	18	0	4	2	4	5	3	4	3	7	8	14	4	0	0	0	10	10	0
ENSGALG00000007862	147	109	179	7	26	27	4	12	8	16	19	11	0	6	10	3	0	16	8	0	0	3	3	9	3	0	4	5	6	7	0	4	0	0	0	0	0	3	12	0	3	8	7	0	2
ENSGALG00000007017	1785	2259	2876	1888	2099	2242	1602	2349	1750	1914	1859	2398	3358	1765	1000	2027	1748	1879	2949	3149	3095	1678	1248	2065	4003	2869	3741	1462	1548	1343	1738	2519	2469	1139	1147	1573	2915	2028	3377	1683	1487	1193	2946	2808	2903
ENSGALG00000007819	3598	5057	4337	3357	3383	3879	4645	2064	2796	733	646	1228	828	3025	2791	599	600	764	1172	2298	1784	603	582	928	1603	407	1577	605	809	691	1342	1066	420	292	418	309	1360	1464	671	884	566	695	1834	1672	1650
ENSGALG00000007798	202	164	302	120	94	181	50	120	72	234	134	234	15	57	86	66	68	171	9	31	60	126	57	178	96	12	59	70	53	45	28	26	12	71	121	150	51	37	27	62	137	342	19	61	51
ENSGALG00000007804	5427	6799	6671	2522	3486	3349	934	1512	1174	3582	3569	4538	491	908	645	3956	1773	2563	553	648	618	3380	1583	4216	628	115	979	2151	1521	2354	398	611	88	1390	2076	1642	391	396	429	1729	1648	1604	563	404	303
ENSGALG00000006926	8	7	9	21	36	25	7	13	6	0	0	0	11	7	16	0	0	0	13	5	7	0	0	0	7	0	0	0	0	0	0	0	0	0	0	0	0	2	10	0	0	0	3	12	9
ENSGALG00000050962	1	0	0	0	0	0	2	0	0	1	1	0	1	0	0	3	0	0	0	0	0	0	0	0	0	0	0	0	0	0	0	0	0	0	0	0	0	0	0	0	0	0	0	0	0
ENSGALG00000026265	7	3	13	0	6	5	1	4	1	4	0	4	0	0	0	3	0	6	1	1	2	1	0	3	4	0	1	3	0	0	3	1	0	1	0	0	0	0	1	0	0	0	2	0	0
ENSGALG00000037856	24	39	33	42	26	31	60	74	95	197	68	245	12	12	11	18	30	44	15	16	13	25	7	37	24	3	9	26	7	14	19	30	11	9	15	16	18	11	26	7	47	35	0	25	9
ENSGALG00000017368	429	112	553	260	291	134	305	288	144	131	248	317	191	415	162	136	71	138	102	375	74	153	250	27	355	19	170	146	106	56	150	152	50	225	239	342	293	175	168	228	353	138	246	165	317
ENSGALG00000000141	21	66	202	169	44	170	63	60	89	916	4083	1236	473	190	54	6043	4523	4556	449	696	1396	7407	8318	16597	864	1137	1468	10322	3939	7970	1861	789	841	9244	6396	13462	1044	1605	1597	8702	8638	5006	426	2225	948
ENSGALG00000016744	41	11	0	0	0	0	0	0	0	10	4	4	0	0	2	0	0	4	0	0	0	0	0	8	0	0	2	6	0	0	0	4	0	0	0	0	0	0	0	0	0	0	0	4	4
ENSGALG00000016740	0	0	0	0	0	0	0	0	0	8	0	9	0	0	0	0	0	0	0	0	0	0	0	0	0	0	0	0	0	0	0	0	0	0	1	0	0	0	2	0	0	0	0	0	0
ENSGALG00000000122	7940	10609	15794	15744	14862	14309	8840	12810	10132	7858	10419	11400	12969	7204	4754	7817	7924	6657	6139	8019	6607	9886	6620	9909	6312	10833	8764	7374	5483	6544	6774	6772	10524	6553	5554	8026	5778	6044	8333	8965	7031	5906	5902	5948	5073
ENSGALG00000030569	238	289	264	218	288	352	328	232	330	377	262	293	298	275	169	400	463	393	145	46	271	459	362	511	252	149	162	429	316	355	264	237	478	280	337	304	243	223	283	437	356	339	289	313	345
ENSGALG00000038209	24	40	29	49	59	49	21	37	35	29	336	54	40	18	0	34	9	19	8	17	11	37	51	64	2	5	37	65	29	14	39	53	24	32	48	74	9	11	21	50	34	60	32	21	30
ENSGALG00000037170	2	4	10	7	5	24	3	20	6	15	10	16	7	0	0	32	26	44	6	6	0	34	32	66	12	4	29	21	36	2	20	17	16	22	26	44	11	18	21	20	30	47	0	53	11
ENSGALG00000000136	5	6	8	8	27	9	8	28	6	2	0	0	25	2	6	8	2	7	4	0	2	6	8	10	0	0	13	8	4	6	31	11	5	2	6	2	6	18	1	2	2	0	14	30	7
ENSGALG00000026396	74	61	44	34	74	57	28	67	47	36	26	14	50	12	19	34	27	12	24	26	9	15	22	21	21	8	43	20	8	3	73	36	10	10	7	4	15	25	2	8	12	3	38	72	14
ENSGALG00000052240	2323	2204	3352	6393	4408	8115	3286	2105	1969	259	190	276	893	2167	753	206	224	219	419	880	715	124	152	259	1799	209	1013	130	120	136	314	553	380	88	127	170	509	610	597	132	119	239	1429	4	855
ENSGALG00000017829	3	1	2	0	0	1	1	0	2	2	0	4	1	0	1	2	1	4	0	0	0	1	1	4	0	1	0	2	4	0	0	1	0	0	1	2	0	1	1	2	1	0	1	1	1
ENSGALG00000025549	0	0	0	0	0	0	0	0	0	0	0	0	0	0	0	0	0	0	0	0	0	0	0	0	0	0	1	0	0	0	0	0	0	0	0	0	0	0	0	0	0	0	0	0	0
ENSGALG00000025548	0	1	0	0	0	0	0	0	0	0	0	0	0	0	0	0	0	0	0	0	0	0	0	0	0	0	0	0	0	0	0	0	0	0	0	0	0	0	0	0	0	0	0	0	0
ENSGALG00000052929	0	5	3	7	15	9	0	0	0	7	0	5	0	0	0	0	0	0	0	0	0	0	0	0	0	0	0	0	0	0	0	0	0	0	3	2	0	0	0	0	0	3	0	0	0
ENSGALG00000025546	0	0	0	0	0	0	0	0	0	0	0	0	0	0	0	0	0	0	0	0	1	0	0	0	0	0	0	0	0	0	0	0	0	0	0	0	0	0	0	0	0	0	0	0	0
ENSGALG00000054938	3	3	3	0	0	0	0	0	0	29	0	0	0	0	0	0	0	0	0	0	0	2	0	0	0	0	0	0	0	5	0	0	0	0	0	0	0	0	0	0	0	0	0	0	0
ENSGALG00000054935	0	2	0	0	0	0	0	0	0	0	0	0	0	0	0	0	0	0	0	0	2	0	0	0	0	0	0	0	0	0	0	0	0	0	0	0	0	0	0	0	0	0	0	0	0
ENSGALG00000054933	0	0	0	0	0	0	0	0	0	5	0	0	0	0	0	0	0	0	0	0	0	0	0	0	0	0	0	0	0	0	0	0	0	2	0	0	0	0	0	0	0	0	0	0	6
ENSGALG00000040416	0	0	13	0	0	0	0	0	0	0	0	0	0	0	0	0	0	0	0	0	0	0	0	0	0	0	2	0	0	0	0	0	0	0	0	0	0	0	0	0	7	0	0	0	0
ENSGALG00000015216	8	17	7	0	8	13	0	0	0	12	8	8	0	0	6	34	45	41	2	0	12	22	30	42	8	5	8	52	40	13	8	2	0	6	27	53	5	29	5	9	17	33	8	10	0
ENSGALG00000015073	824	1033	847	716	811	821	413	435	476	1161	547	1229	516	346	177	1216	808	1026	335	183	267	1127	1176	1018	297	347	356	1000	1040	695	415	478	452	729	785	1138	246	356	263	891	909	915	373	366	331
ENSGALG00000015069	518	564	303	333	342	382	131	113	112	274	256	365	92	109	107	283	226	96	115	74	130	139	221	330	192	67	170	276	358	338	228	156	92	201	198	209	123	119	175	275	225	193	259	222	162
ENSGALG00000028971	3330	4291	5495	4063	4403	4532	3326	6285	3716	2337	3000	2831	3462	1996	1222	3402	2735	2678	2303	2883	2468	3941	2406	3759	2137	3203	2559	2510	2188	2038	2420	2346	3924	1939	1968	2717	1700	2157	2716	3365	2632	2051	1856	3046	1876
ENSGALG00000042796	2853	3094	3766	3263	2482	2993	2325	2687	3341	1262	820	1266	1030	2382	2021	1329	944	1135	923	708	1197	1133	944	1212	2415	276	940	933	961	1088	925	1169	654	633	776	741	1124	1106	1044	1471	1108	1155	1248	1583	1646
ENSGALG00000052994	428	427	585	349	455	498	273	269	265	97	81	161	185	161	98	52	66	104	61	84	112	138	78	122	108	94	153	66	49	109	90	36	120	49	22	36	60	56	72	58	29	37	42	93	56
ENSGALG00000003536	1525	1671	1369	872	954	1245	655	602	547	1753	557	903	158	301	236	2088	1063	825	222	49	196	1722	1666	1595	331	68	433	1215	1039	1109	241	240	47	730	1115	481	299	291	347	726	799	800	184	209	123
ENSGALG00000003464	17	13	18	11	26	13	31	0	9	383	112	47	5	4	4	34	25	11	8	4	12	23	22	18	2	0	5	2	15	9	6	5	0	6	6	7	3	5	6	4	0	0	0	8	2
ENSGALG00000003475	1180	1242	1645	98	429	425	2	176	46	1674	481	1391	101	118	130	787	333	593	32	43	68	671	502	592	94	38	64	1003	1268	891	133	138	80	377	496	545	50	66	44	552	532	180	97	50	55
ENSGALG00000014997	333	407	400	691	421	632	95	164	215	142	156	171	116	273	284	175	84	302	63	86	80	193	102	171	87	29	185	87	226	155	108	88	52	70	141	92	103	116	63	46	101	77	136	167	51
ENSGALG00000053632	0	0	2	3	0	4	2	2	0	52	10	22	6	4	0	12	10	6	0	7	0	15	2	0	0	2	0	0	0	0	0	8	6	0	0	8	0	12	0	0	0	0	59	13	11
ENSGALG00000032247	2733	3799	1989	3059	2270	3211	2287	1890	1518	5686	1761	6406	1027	1116	587	5096	5612	4429	1308	1117	560	7140	5512	4434	1552	855	1515	4338	5249	5135	1858	2351	2254	2960	4963	6095	1547	2617	3560	2396	6009	3858	2011	1340	2113
ENSGALG00000015006	75	54	121	21	29	24	6	7	0	105	84	110	7	4	3	31	37	76	9	6	6	54	28	37	11	0	37	52	21	28	15	4	0	16	4	3	8	17	28	22	28	34	3	2	2
ENSGALG00000023821	13	13	17	3	14	16	24	21	8	161	115	108	61	10	13	55	99	64	10	0	20	47	46	100	29	13	18	44	34	32	21	7	64	36	46	32	15	28	18	2	31	31	25	36	19
ENSGALG00000003403	152	112	136	143	233	171	328	314	297	30	20	40	64	67	55	6	9	5	26	19	10	16	5	10	36	8	24	2	7	0	59	46	44	0	3	15	5	8	0	0	0	14	7	38	18
ENSGALG00000015038	144	126	100	8	33	60	6	20	19	72	17	26	13	10	0	52	0	24	9	0	22	29	6	13	5	0	1	42	22	10	2	0	0	6	4	0	0	0	3	0	31	26	0	0	0
ENSGALG00000015059	800	707	895	471	520	570	344	280	275	586	326	433	265	217	115	510	409	732	159	78	146	492	353	490	234	72	257	383	371	536	153	128	102	289	248	210	59	99	94	436	267	189	138	74	85
ENSGALG00000051265	0	0	0	0	0	0	0	0	0	0	0	0	0	0	0	0	0	0	0	0	0	0	0	0	0	0	0	0	0	0	0	0	0	1	0	0	0	1	0	0	0	0	0	0	0
ENSGALG00000051264	0	0	0	0	0	0	0	0	0	0	0	4	0	0	0	2	2	6	0	0	0	4	0	0	0	0	0	0	0	0	0	0	0	0	0	0	0	0	0	0	0	0	0	0	0
ENSGALG00000051261	0	0	4	0	0	0	0	0	0	0	0	0	0	0	0	0	0	0	0	0	0	0	0	0	0	0	0	0	0	0	0	0	0	0	0	0	0	0	0	0	3	0	0	0	0
ENSGALG00000054050	3	0	0	0	3	0	0	0	0	0	0	0	0	0	0	0	0	0	0	0	0	0	0	0	10	0	0	0	0	0	0	0	0	0	2	0	0	0	0	0	0	0	0	0	0
ENSGALG00000054053	0	0	0	0	0	0	0	0	0	0	0	0	0	0	0	0	0	0	0	0	0	0	0	0	0	0	0	0	0	0	0	0	0	0	3	0	0	0	0	0	0	0	0	0	0
ENSGALG00000051881	0	3	2	0	0	2	0	0	0	0	0	5	0	0	0	0	2	0	0	0	0	0	0	0	0	0	0	0	0	0	0	0	0	0	2	0	0	0	0	0	0	0	0	0	0
ENSGALG00000051880	6	0	3	0	5	0	0	0	0	4	2	0	0	0	0	5	0	0	0	0	0	0	0	0	0	0	0	4	4	0	0	0	0	6	3	0	3	0	0	0	0	0	0	0	0
ENSGALG00000045173	35	52	28	8	12	23	0	0	0	179	144	290	40	27	0	140	227	275	8	0	31	131	161	151	5	29	64	92	98	101	40	0	7	37	131	54	0	127	15	75	73	119	74	3	0
ENSGALG00000051884	0	0	0	0	0	0	0	0	0	0	0	0	0	0	0	0	0	0	0	0	0	0	0	0	0	0	0	0	0	0	0	0	0	0	0	0	0	0	0	0	0	0	0	2	0
ENSGALG00000027424	0	0	0	0	0	0	0	0	0	0	0	0	0	2	0	0	0	0	2	0	0	0	0	0	0	0	0	0	0	0	0	0	0	2	2	0	0	0	0	0	0	0	0	0	0
ENSGALG00000054056	0	0	8	0	0	0	0	0	0	4	18	0	0	0	0	10	0	0	0	0	0	2	0	9	3	0	0	0	0	0	0	0	0	0	0	0	0	0	0	0	0	0	0	0	0
ENSGALG00000050139	4	15	10	3	4	5	1	2	1	3	0	0	1	1	2	1	2	6	0	0	1	3	0	0	2	0	0	0	0	16	0	5	1	1	1	0	0	4	1	1	2	7	0	4	1
ENSGALG00000050130	0	0	0	0	0	0	0	0	0	0	0	0	0	0	0	0	0	0	0	6	0	6	0	0	0	0	0	0	0	0	0	0	0	0	0	0	0	2	0	0	0	0	0	0	0
ENSGALG00000050137	5	0	0	0	0	0	0	0	0	0	0	0	0	0	0	0	0	0	0	0	0	0	0	0	0	0	0	0	0	0	0	0	0	0	0	0	0	0	0	0	0	0	0	0	0
ENSGALG00000050134	1	0	0	1	0	0	0	0	0	1	0	0	0	0	0	0	0	0	1	0	0	0	0	0	0	0	0	0	0	0	0	0	0	0	0	0	0	0	0	1	0	0	2	0	0
ENSGALG00000050135	0	0	2	0	0	0	0	0	0	0	0	0	0	0	0	0	0	0	0	0	0	0	0	0	0	0	0	0	0	0	0	0	0	0	0	0	0	0	0	0	0	0	0	0	0
ENSGALG00000047163	1003	1084	1553	557	774	840	399	438	454	677	403	652	335	367	241	564	361	524	162	142	146	540	440	589	206	189	248	520	381	367	202	184	229	206	293	287	145	176	179	402	325	414	193	239	103
ENSGALG00000008057	275	322	379	147	247	272	137	145	88	892	252	312	129	70	57	406	257	335	106	2	47	282	225	296	143	27	130	184	122	217	70	74	15	102	168	107	36	110	41	71	76	134	65	57	40
ENSGALG00000008023	599	1237	262	823	298	464	463	315	396	396	239	170	285	633	504	209	271	147	202	83	62	442	292	456	368	221	258	492	122	408	320	217	282	190	97	231	195	221	210	208	200	218	172	222	108
ENSGALG00000008034	1410	1501	1171	1979	1903	2064	320	1171	1117	1087	276	812	576	537	549	708	689	920	351	62	314	1151	1195	1069	408	345	676	686	1107	1604	778	407	551	611	804	1082	461	505	765	497	396	653	458	346	276
ENSGALG00000049838	648	681	476	679	626	630	850	436	393	417	63	230	472	491	361	305	285	228	250	27	267	371	264	148	303	362	291	291	186	118	427	236	540	158	194	133	178	173	199	225	161	191	159	183	158
ENSGALG00000052276	0	3	7	0	0	6	12	4	5	15	0	0	7	0	5	0	4	9	8	0	0	11	3	16	3	0	0	3	6	8	0	0	0	5	0	3	0	0	0	0	0	3	0	0	0
ENSGALG00000050158	55	86	259	173	233	176	157	144	98	24	130	21	123	2	11	0	113	31	0	25	64	110	132	181	27	17	0	106	26	75	0	0	114	71	82	113	87	92	72	76	76	84	64	86	67
ENSGALG00000054310	72	86	132	73	118	97	178	195	150	59	126	110	117	92	69	142	92	115	39	56	70	180	148	190	62	39	50	136	101	177	60	69	90	183	163	240	84	99	106	150	236	165	75	97	77
ENSGALG00000047339	0	0	37	20	0	0	0	0	0	0	0	0	0	0	0	0	1	2	0	0	0	0	0	0	0	0	0	0	0	5	0	0	0	0	0	0	0	0	0	0	0	0	0	0	0
ENSGALG00000051337	0	0	0	0	0	0	0	0	0	0	0	0	0	0	0	0	0	0	0	0	0	0	0	0	0	0	0	0	0	0	0	0	0	0	0	0	0	0	2	0	0	0	0	0	0
ENSGALG00000009737	3	0	0	0	3	6	0	2	0	0	0	0	0	0	0	0	0	0	0	0	0	0	0	0	0	0	0	0	0	0	0	0	0	0	0	0	0	0	0	0	0	0	0	2	0
ENSGALG00000004360	67	102	151	134	165	123	112	292	106	28	35	22	35	31	36	9	12	6	17	35	7	3	4	12	24	28	16	6	17	0	16	29	20	0	16	0	10	17	20	14	17	0	7	26	15
ENSGALG00000036161	0	0	0	0	0	0	0	0	0	2	0	0	0	0	0	0	0	0	0	0	0	0	0	0	0	0	0	0	0	0	0	0	0	3	1	0	0	0	0	0	0	0	0	0	0
ENSGALG00000042837	0	3	0	0	0	0	0	0	0	0	0	0	0	0	0	0	0	0	0	0	0	0	0	0	0	0	0	0	0	0	0	0	0	0	0	0	0	0	0	0	0	0	0	0	0
ENSGALG00000045823	2	0	0	0	0	0	0	0	0	0	0	0	0	0	0	0	0	3	0	0	0	0	0	0	0	0	0	0	0	0	0	0	0	0	0	0	0	0	0	0	0	0	0	0	0
ENSGALG00000042095	0	0	14	0	0	0	0	0	3	0	0	0	0	2	0	1	0	0	0	0	2	0	2	0	2	0	0	0	7	5	0	0	2	0	0	2	0	0	0	2	0	0	4	3	0
ENSGALG00000051119	0	0	0	0	0	0	0	5	0	0	0	2	15	28	0	4	0	0	0	0	0	0	0	0	0	0	0	0	0	0	0	0	0	0	0	0	0	0	0	0	0	0	0	0	0
ENSGALG00000030372	21	5	5	2177	377	1075	2314	1693	917	1	0	0	292	164	124	0	5	0	162	83	118	0	0	0	240	159	128	0	0	0	250	120	283	0	0	0	67	72	126	0	0	0	44	128	41
ENSGALG00000054449	123	192	374	301	265	222	727	499	586	192	156	315	471	479	286	138	169	273	250	535	393	226	118	183	263	538	370	250	195	126	455	339	1093	219	157	319	514	361	632	54	216	183	448	425	426
ENSGALG00000038231	0	2	13	2	7	2	0	4	0	9	62	0	0	0	0	0	0	0	0	0	0	0	0	0	0	0	0	0	0	0	0	0	0	0	0	0	0	0	4	0	0	0	0	0	0
ENSGALG00000043885	2	2	2	0	0	4	0	0	0	61	14	5	0	0	0	9	0	0	0	0	0	0	0	0	0	0	0	0	1	0	0	0	0	0	0	4	0	0	0	0	5	3	0	0	0
ENSGALG00000036086	478	764	451	380	474	1022	232	486	554	3734	3157	4160	495	420	265	2909	2367	3311	111	142	210	2981	3671	3044	141	482	511	2460	4094	3737	897	1073	1794	3601	3899	8395	124	462	454	6117	3709	3546	688	663	54
ENSGALG00000031193	202	232	316	202	273	258	217	181	132	165	201	180	162	100	50	91	148	121	47	26	89	183	181	210	49	60	42	189	73	205	72	43	145	100	143	183	53	107	117	134	126	116	76	108	83
ENSGALG00000039887	334	441	686	756	878	940	810	846	897	412	641	743	522	438	325	474	854	640	363	845	640	639	635	800	281	759	348	542	484	749	463	633	1318	480	439	760	423	662	759	457	453	400	741	677	442
ENSGALG00000022137	56	43	89	36	56	77	254	70	95	6702	8206	19917	498	25	13	4658	4151	12881	13	12	52	7354	4510	1185	35	24	25	3434	1092	675	11	13	18	193	150	494	13	12	18	287	1676	188	7	10	12
ENSGALG00000031300	0	0	6	4	0	3	0	0	0	0	0	0	0	0	0	0	0	0	0	0	0	0	0	0	0	0	0	0	0	0	0	0	0	0	1	0	0	0	1	0	0	0	0	0	0
ENSGALG00000031305	4	5	5	2	7	4	0	2	0	7	8	0	0	0	0	10	7	5	0	0	2	3	0	0	0	0	2	0	0	0	0	8	0	0	1	0	0	0	0	0	20	0	0	0	0
ENSGALG00000012882	197	252	236	134	168	193	147	189	123	314	243	223	104	186	124	529	247	169	216	214	211	460	404	482	247	48	297	343	222	351	105	127	49	267	314	211	163	201	163	256	271	311	233	191	155
ENSGALG00000009940	2409	3559	3466	1373	2197	2185	533	649	612	1695	1608	1886	429	458	281	2470	1230	1625	254	249	359	1473	2039	2240	414	216	491	1886	2086	2109	412	514	251	1609	2686	3076	324	658	542	1989	2468	2683	390	612	496
ENSGALG00000053128	7	13	19	27	51	37	8	38	22	56	36	64	32	4	8	70	39	42	15	8	10	51	24	43	16	4	11	22	15	8	17	3	0	32	37	37	9	13	20	19	39	28	0	17	0
ENSGALG00000049477	16	15	43	12	11	29	14	10	5	124	119	93	6	9	12	80	63	48	6	0	5	116	44	102	22	7	21	45	15	24	13	11	5	26	36	133	9	13	0	60	42	93	23	4	4
ENSGALG00000009942	1177	1198	1017	724	787	882	538	446	403	1539	774	946	161	939	667	1415	774	926	328	342	395	1062	791	1082	516	90	437	603	653	702	435	370	84	568	887	591	308	453	219	662	731	729	291	439	275
ENSGALG00000009945	136	121	199	875	651	960	1928	2135	1914	870	1083	1777	408	771	716	939	779	668	223	145	272	612	250	761	453	40	145	376	423	199	56	115	48	210	212	302	58	131	117	181	168	97	167	92	89
ENSGALG00000019355	2376	2575	2807	1481	1509	1696	697	767	397	361	543	726	417	473	221	744	663	532	356	254	274	552	581	792	406	155	399	476	593	447	268	395	127	421	560	839	254	385	111	728	814	467	351	382	359
ENSGALG00000009963	567	584	1011	189	315	283	172	155	154	645	331	348	89	135	94	341	213	247	70	156	128	304	255	503	94	27	127	256	244	191	68	137	54	290	179	326	87	118	100	367	403	336	193	178	141
ENSGALG00000009966	433	428	240	186	218	295	99	129	128	372	83	151	27	137	92	241	130	79	92	19	35	267	169	174	107	25	133	99	152	156	74	98	20	137	253	187	52	103	103	98	142	106	32	105	57
ENSGALG00000009975	1305	1479	1846	698	667	756	179	300	413	1117	705	1042	297	533	521	672	224	582	232	361	293	602	553	575	360	54	242	584	734	799	297	394	192	820	735	920	350	350	186	1194	825	654	641	467	645
ENSGALG00000052215	22	17	15	0	13	0	0	0	0	0	0	0	0	0	4	0	0	2	0	0	0	2	2	0	0	0	0	0	0	0	0	0	0	0	0	0	0	0	0	0	0	0	0	0	0
ENSGALG00000052216	0	0	0	0	0	0	0	0	0	0	0	0	0	0	0	3	0	0	0	0	0	0	0	0	0	0	0	0	0	0	0	0	0	0	2	0	0	0	0	0	0	0	0	0	0
ENSGALG00000052211	4	0	0	7	3	0	0	2	0	4	8	0	0	4	0	0	0	0	0	0	4	4	0	0	2	0	0	0	0	0	0	0	0	0	0	0	0	2	0	7	0	0	3	0	0
ENSGALG00000051743	3	0	0	0	0	1	0	0	0	0	0	0	0	0	0	0	0	0	0	2	0	0	0	0	0	0	0	0	5	0	0	0	0	6	4	0	0	0	0	0	0	0	0	0	0
ENSGALG00000051741	5	0	0	0	0	0	0	0	0	0	0	0	0	0	0	0	0	0	0	0	0	0	0	0	0	0	0	0	0	0	0	0	0	0	0	0	0	0	0	0	0	0	0	0	0
ENSGALG00000051749	13	25	17	0	9	9	2	8	0	0	0	5	0	3	0	5	11	5	0	0	0	0	3	5	0	0	0	3	7	3	0	0	13	11	0	0	0	0	6	6	6	4	0	0	0
ENSGALG00000012061	238	1681	14	107	96	234	84	25	197	33405	19259	44671	145	219	422	22138	14338	47460	58	24	26	26858	35759	27935	41	21	134	62075	35566	55879	245	233	42	46502	58063	58034	38	103	102	74997	58941	2443	136	101	43
ENSGALG00000012067	49	39	50	1	13	12	0	2	0	67	5	19	0	0	0	27	9	3	2	0	2	10	4	4	0	0	0	4	10	7	0	3	0	0	7	8	0	0	10	0	3	1	3	2	0
ENSGALG00000012055	258	346	465	339	453	512	214	253	212	274	355	311	256	59	36	412	321	421	86	64	93	471	185	604	94	65	181	116	150	130	52	49	91	65	201	185	24	98	119	109	160	138	70	111	58
ENSGALG00000012059	488	645	399	267	335	393	119	176	74	576	128	280	48	199	47	438	188	196	55	10	73	247	239	184	81	28	165	199	460	179	72	190	18	94	241	130	50	172	54	120	139	127	53	171	55
ENSGALG00000012049	264	307	241	159	184	205	102	220	104	233	261	172	73	101	192	212	105	141	207	90	98	138	97	182	101	24	100	110	126	115	166	188	30	60	98	83	35	180	112	188	103	246	131	138	37
ENSGALG00000012052	227	267	238	126	148	193	49	75	51	198	130	181	37	42	28	103	117	111	32	68	45	116	133	186	57	13	64	89	88	110	28	58	10	73	104	64	66	62	108	70	86	85	57	87	60
ENSGALG00000011813	874	971	453	1038	846	1078	1009	815	375	1069	397	942	319	625	388	1616	1304	882	585	30	234	508	2592	1646	602	626	958	828	1654	1520	1519	666	288	828	1312	909	639	781	953	665	577	461	617	669	282
ENSGALG00000012045	17	21	36	7	11	10	2	0	3	110	18	4	2	0	0	1	6	8	2	0	0	4	4	0	0	0	0	0	5	0	0	0	0	3	0	0	0	0	0	14	2	0	0	0	0
ENSGALG00000026422	23	42	45	76	59	52	67	54	39	1586	1031	709	28	106	39	926	1060	1213	126	128	118	1163	943	1128	213	47	272	754	642	624	281	201	65	653	821	858	171	226	325	464	713	542	203	238	120
ENSGALG00000012072	171	236	128	147	249	176	103	140	129	5661	2920	2943	218	747	470	2039	2073	1857	288	99	257	1550	1942	2205	503	100	627	1182	1213	1129	506	379	106	1191	2178	887	292	631	396	771	1451	914	355	744	296
ENSGALG00000002525	540	353	321	304	302	167	119	100	160	351	75	142	30	67	63	109	111	118	103	46	28	355	175	305	56	34	219	191	269	246	81	107	18	113	139	221	16	95	128	319	354	129	93	61	49
ENSGALG00000047218	0	0	0	0	1	0	0	0	0	0	0	0	0	0	0	0	0	0	0	0	0	0	1	0	0	0	0	0	1	1	0	0	0	0	0	1	0	0	0	1	0	0	0	0	0
ENSGALG00000002507	44	56	471	32	80	52	17	12	16	161	46	11	12	2	2	86	15	10	0	4	0	8	323	22	0	0	6	8	268	33	0	0	4	5	17	7	5	6	15	2	0	18	0	7	3
ENSGALG00000048598	25	30	13	15	53	8	2	13	5	0	0	0	0	9	0	0	0	0	0	0	0	0	0	0	2	0	0	0	0	0	5	0	0	0	0	0	0	0	0	0	12	0	0	5	0
ENSGALG00000002496	10	6	4	0	8	4	0	0	0	18177	3159	192	0	4	0	86	0	0	8	0	0	0	0	0	0	0	0	0	3	3	0	0	0	3	0	0	0	0	4	0	0	0	0	0	0
ENSGALG00000002503	4	19	45	0	13	22	0	14	0	27152	3706	132	0	6	0	3	8	3	22	0	0	0	4	0	0	0	0	0	10	0	0	0	0	0	0	0	0	0	0	0	0	7	0	0	0
ENSGALG00000002479	12859	19142	18390	19446	28225	29892	556	396	1545	452	47	133	97	1340	4716	156	29	33	114	306	246	30	355	34	379	25	268	26	562	130	161	113	77	44	49	36	64	36	22	69	76	54	121	84	96
ENSGALG00000050806	236	262	323	820	1136	835	50	427	110	525	304	12	56	14	9	101	5	0	0	8	13	12	481	8	10	13	0	10	681	165	0	12	7	19	50	0	11	11	8	6	12	8	9	7	12
ENSGALG00000002543	733	733	455	554	662	754	263	269	187	1253	428	1244	131	286	141	1306	941	1194	119	65	94	1072	511	762	203	63	238	1439	812	2039	151	198	42	1432	1558	1688	113	130	153	1743	1206	2057	140	228	123
ENSGALG00000002555	139	104	33	61	131	156	83	16	82	1095	912	1216	26	45	41	2986	2352	1629	10	7	6	3435	5250	2434	26	5	38	2187	2055	2379	19	39	0	2192	4226	1563	0	51	32	2123	2715	1761	4	23	4
ENSGALG00000049462	0	0	0	0	0	0	0	0	0	0	0	0	0	0	0	0	0	0	0	0	0	0	0	0	0	0	0	0	0	0	0	0	0	0	0	0	0	0	0	0	0	0	0	5	0
ENSGALG00000049463	0	0	0	0	0	0	0	0	0	0	0	4	0	0	0	0	0	3	0	0	0	0	0	0	0	0	0	0	0	0	0	0	0	0	0	0	0	2	0	3	3	0	0	0	0
ENSGALG00000049460	0	0	0	0	0	0	0	0	0	9	0	0	0	6	0	0	0	0	0	0	0	0	3	0	0	0	9	0	3	0	0	0	0	0	0	0	3	0	0	0	0	0	0	0	0
ENSGALG00000002886	0	0	0	0	0	12	0	0	0	0	0	0	0	0	0	0	0	0	0	0	0	3	0	0	0	0	0	0	0	0	0	2	2	0	3	3	0	3	0	0	0	0	0	0	0
ENSGALG00000049468	0	0	0	0	0	0	0	0	0	0	0	1	0	0	0	0	0	0	0	0	0	0	0	0	0	0	0	0	0	0	0	0	0	0	0	0	0	0	0	0	0	0	0	0	0
ENSGALG00000007131	3390	3451	3925	731	954	914	448	819	1202	1913	1267	2121	229	397	391	896	445	655	135	219	179	641	582	1105	250	44	168	730	679	490	144	169	64	595	404	533	174	210	188	758	817	603	310	324	164
ENSGALG00000007128	15410	17671	21077	3198	4201	4844	1497	2837	2520	34922	20995	50965	726	1171	1377	32037	20488	46179	912	1405	1129	24446	32427	31624	1695	560	2563	53180	53067	61048	1348	2282	415	55874	60312	57277	844	1580	1777	76831	71763	56720	2082	2124	1044
ENSGALG00000007123	43	72	87	12	35	53	18	30	20	208	236	236	12	11	14	171	183	276	7	29	14	146	128	298	43	19	74	93	220	96	35	40	19	99	154	65	53	87	30	98	240	75	55	113	18
ENSGALG00000007110	223	285	303	3681	3540	3123	3820	5885	3273	24	15	65	2599	5846	3133	35	142	6	1240	1708	1050	8	0	40	2615	754	1316	4	30	10	1265	1140	937	7	8	10	759	683	456	0	2	9	901	1198	795
ENSGALG00000052520	0	0	0	4	0	14	6	0	0	0	0	0	0	14	6	0	0	0	2	6	18	0	0	0	2	2	0	0	0	0	6	0	4	4	0	0	0	0	7	0	0	0	4	0	0
ENSGALG00000039896	0	0	0	0	0	0	0	0	0	0	0	0	0	0	0	0	0	0	0	0	0	0	0	0	0	0	0	0	0	0	0	2	0	0	0	0	0	0	0	0	0	0	0	0	0
ENSGALG00000049861	0	0	0	0	0	0	0	0	0	0	0	0	2	0	0	0	0	0	0	0	0	0	0	0	0	0	0	0	0	0	0	0	0	0	0	0	0	0	0	0	0	0	0	0	0
ENSGALG00000054566	0	0	0	2	1	2	0	0	2	0	0	0	1	0	0	0	0	0	0	0	0	0	0	0	0	0	0	0	0	0	0	0	3	0	0	0	0	6	0	0	0	0	0	0	0
ENSGALG00000029329	8	4	12	26	21	14	39	35	10	0	7	4	0	4	8	0	0	4	3	4	0	4	0	0	4	0	0	0	0	4	0	8	0	0	0	0	0	0	3	0	4	0	3	0	3
ENSGALG00000007041	565	589	358	239	381	448	102	115	97	205	62	157	35	135	77	168	82	107	57	38	48	139	105	172	97	4	120	105	125	98	81	117	16	101	122	143	60	138	90	135	98	125	49	100	45
ENSGALG00000039333	0	1	0	0	0	0	0	0	0	0	0	0	0	0	0	0	0	0	0	0	0	0	0	0	2	0	0	0	0	0	0	0	0	0	0	0	0	0	3	0	0	0	0	0	0
ENSGALG00000054205	289	253	478	224	206	271	214	292	226	362	261	350	99	189	127	483	326	450	125	134	84	513	372	446	158	72	150	286	334	386	76	167	88	205	301	253	76	164	112	369	318	383	119	135	96
ENSGALG00000032749	2	0	0	0	0	3	0	0	12	118	13	21	0	0	3	47	32	46	5	12	15	100	32	136	14	0	17	23	19	41	0	0	3	31	12	33	14	6	23	62	20	17	9	4	4
ENSGALG00000037880	2261	3467	4909	5810	4185	4923	15611	7730	7446	1286	1148	2743	5505	6600	5082	1927	1055	1518	1340	2260	2184	1202	1596	2152	2635	1385	1576	1632	2186	2151	1838	2251	1740	870	1196	1207	1833	1743	1114	1661	1817	1840	1269	1334	1406
ENSGALG00000040136	15	46	39	2	16	10	0	3	9	44	42	79	2	7	0	38	128	93	2	0	22	20	38	58	15	2	14	27	37	19	9	20	13	29	39	52	0	44	15	42	12	18	7	18	0
ENSGALG00000041081	188	247	177	228	234	282	104	112	133	194	87	138	78	153	95	229	85	153	49	31	76	208	318	284	89	55	62	147	163	191	63	160	42	174	96	237	93	126	75	143	236	192	99	91	83
ENSGALG00000040397	54	69	66	25	9	29	8	11	36	25	20	42	0	0	5	15	5	26	8	16	10	5	7	9	12	4	9	5	13	5	0	6	0	15	6	6	5	12	0	0	9	10	12	0	10
ENSGALG00000037829	186	152	76	36	35	32	0	9	3	0	0	5	7	18	18	0	0	0	6	2	5	0	0	0	2	0	10	0	0	0	0	0	0	5	0	0	0	0	0	0	0	0	0	0	0
ENSGALG00000031018	413	413	404	94	104	114	33	48	68	12	19	25	8	7	10	36	7	33	15	8	7	32	39	35	20	4	24	3	22	31	12	18	0	16	38	19	4	11	0	12	21	30	11	3	6
ENSGALG00000053325	8	4	0	7	9	6	2	0	0	4	0	0	0	2	0	2	7	0	0	0	0	3	0	0	2	0	2	0	0	0	0	0	0	2	7	0	0	2	0	9	4	2	9	0	0
ENSGALG00000035927	220	178	342	212	190	234	764	460	259	471	206	390	54	214	285	210	141	205	26	56	64	388	302	323	58	20	81	205	192	150	36	79	20	86	137	95	31	46	32	111	201	178	59	37	48
ENSGALG00000041800	2	0	3	0	5	0	5	12	0	31	18	34	3	0	0	23	15	11	9	0	0	14	14	21	8	0	5	11	10	5	0	8	0	14	10	30	0	5	2	3	19	19	3	10	13
ENSGALG00000048629	0	0	3	8	0	6	0	0	0	10	1	14	5	0	0	30	24	8	4	0	3	13	12	8	4	10	14	14	24	9	20	6	14	22	21	44	0	5	0	20	12	29	0	4	3
ENSGALG00000054588	8	0	21	19	3	28	0	0	0	62	67	81	20	5	0	186	73	124	16	23	10	119	124	91	45	42	38	136	153	80	31	15	32	166	143	257	8	53	9	246	133	40	20	99	9
ENSGALG00000048741	0	0	4	0	0	0	0	0	0	0	0	7	0	0	0	8	0	5	0	0	0	11	0	0	0	0	0	0	8	3	0	0	0	5	3	8	0	0	0	0	0	8	0	2	0
ENSGALG00000045473	0	0	0	0	4	4	0	0	0	16	0	8	8	0	0	17	42	31	0	0	3	31	15	21	4	3	3	19	18	7	2	3	0	12	25	36	0	4	4	21	20	9	0	3	3
ENSGALG00000055001	0	18	24	5	13	19	0	0	0	41	37	97	0	4	0	159	82	65	15	26	14	131	37	53	12	0	8	66	69	25	5	11	12	58	71	63	0	7	0	45	25	87	0	16	6
ENSGALG00000032887	18	11	31	11	28	37	0	6	0	50	80	62	21	6	0	128	151	143	15	0	22	98	107	100	8	34	8	104	108	72	35	23	46	69	144	115	9	47	7	85	77	76	8	35	16
ENSGALG00000048054	27	0	16	6	8	10	0	0	0	23	40	35	5	0	0	337	34	32	15	50	4	232	74	22	8	5	8	210	53	60	65	8	6	29	29	41	9	13	2	39	19	57	11	13	8
ENSGALG00000052414	0	0	0	0	3	0	0	0	0	8	0	6	2	0	0	27	29	16	0	33	0	128	0	4	0	0	0	21	16	7	6	0	0	19	18	23	0	2	2	17	9	6	0	4	3
ENSGALG00000051595	14	106	20	0	28	10	4	0	0	10	0	12	9	12	0	33	18	13	0	20	0	67	11	4	4	7	0	20	11	4	19	13	4	9	7	10	0	10	4	13	14	0	4	9	3
ENSGALG00000053052	0	0	0	0	0	2	0	0	0	0	0	7	3	0	0	20	9	12	5	0	3	17	9	8	0	0	0	16	8	3	4	0	5	6	3	9	6	6	10	15	7	8	0	2	0
ENSGALG00000022896	12	0	0	0	5	2	0	0	0	0	0	6	0	0	0	0	0	0	0	2	0	8	5	2	0	0	2	8	0	6	0	0	0	24	0	6	2	0	0	10	12	0	0	0	0
ENSGALG00000048784	0	0	0	0	0	0	0	0	0	0	0	0	0	0	0	0	0	0	0	0	0	0	0	0	0	0	0	0	0	0	0	0	0	0	0	0	0	3	0	0	0	0	0	0	0
ENSGALG00000048785	2	10	17	0	0	0	4	0	0	4	3	7	5	2	2	23	12	9	0	0	0	33	20	32	4	0	3	22	2	15	8	0	0	5	0	4	0	8	0	6	9	7	6	0	0
ENSGALG00000048786	4	13	47	11	42	60	8	16	0	3	0	9	6	2	0	2	10	2	0	0	0	5	6	9	0	0	0	0	0	0	0	0	0	0	0	0	0	0	0	0	0	0	0	5	0
ENSGALG00000047610	2108	2362	1692	1048	1712	2970	753	848	1008	1477	558	1895	811	638	246	1492	1626	1751	349	76	342	1767	1871	1953	568	448	501	1038	1405	1326	434	534	558	562	1612	778	226	530	282	1289	1112	619	172	359	173
ENSGALG00000054294	409	487	932	383	515	522	263	367	346	434	1014	606	336	55	60	307	742	374	39	108	228	962	623	972	135	60	9	691	209	854	58	48	118	587	624	837	57	71	101	798	197	514	46	228	94
ENSGALG00000048782	8	6	5	0	2	7	0	0	0	0	0	0	0	0	0	0	0	0	0	0	3	0	0	0	0	0	0	0	0	0	2	0	0	0	0	0	0	0	4	0	0	0	0	0	0
ENSGALG00000048783	0	0	0	0	0	0	0	0	0	0	0	0	0	0	0	0	0	0	0	0	0	0	0	0	0	0	0	0	0	4	0	0	0	0	0	0	0	0	0	0	0	0	0	0	0
ENSGALG00000050001	248	452	633	341	517	409	235	461	309	622	1682	862	768	433	150	632	595	667	544	768	532	825	994	750	429	807	424	705	542	1133	567	418	1087	739	998	1226	726	469	954	1183	1056	1159	456	606	638
ENSGALG00000050005	33	41	57	11	57	19	9	3	5	6	0	10	6	5	6	6	0	20	6	2	5	10	19	11	0	6	4	3	3	4	7	11	35	0	2	8	7	5	8	13	0	8	8	23	11
ENSGALG00000054251	107	429	486	47	422	385	21	190	36	130	250	181	27	121	66	53	41	119	9	4	47	31	197	96	13	93	51	45	141	83	16	32	61	24	157	25	6	100	5	20	227	77	15	86	40
ENSGALG00000049504	0	0	9	31	203	139	457	551	164	27	62	35	190	296	121	11	44	112	33	28	136	87	290	48	83	0	28	153	75	156	147	104	368	74	78	26	0	149	0	88	162	76	113	480	215
ENSGALG00000053042	3	4	4	0	3	2	0	0	0	0	0	6	2	0	0	16	6	6	0	0	0	35	8	0	0	0	0	6	14	7	0	0	3	9	9	12	0	5	0	9	9	13	0	0	0
ENSGALG00000049362	2	14	3	0	10	0	0	0	0	14	10	7	4	0	0	37	17	21	5	0	0	23	20	37	7	6	6	32	41	53	14	8	13	46	36	63	0	4	6	22	23	51	10	7	3
ENSGALG00000047182	4718	6529	5868	5386	11277	10669	3324	2510	3544	16	53	17	486	2191	1202	19	13	5	157	119	162	16	20	13	204	154	209	19	20	0	331	118	311	19	0	14	91	89	50	34	0	12	110	155	71
ENSGALG00000050829	3	9	9	3	13	17	0	6	6	113	216	131	6	14	6	20	17	80	0	3	17	39	107	66	4	31	13	34	28	37	4	7	23	17	85	5	3	32	0	26	157	56	4	50	16
ENSGALG00000002266	10	7	0	6	0	0	0	5	0	5	0	4	0	3	0	0	0	2	3	2	0	0	0	2	0	2	0	0	2	0	1	0	0	0	6	0	0	0	6	0	0	0	0	4	0
ENSGALG00000014501	16	3	6	0	3	3	0	0	5	18	13	9	0	0	0	3	8	3	3	0	0	0	0	0	0	0	2	6	0	0	6	10	0	0	0	3	6	10	0	0	0	3	0	5	7
ENSGALG00000010517	743	665	916	157	617	715	203	84	249	840	727	142	147	79	84	693	168	109	99	41	131	466	489	180	161	41	187	401	273	438	109	122	57	251	83	279	101	122	131	57	382	73	117	152	63
ENSGALG00000010500	8	3	17	0	4	19	0	3	0	2	0	0	0	0	0	0	2	4	0	0	0	7	0	0	6	0	0	0	4	0	0	3	0	11	9	0	0	0	0	0	0	3	4	2	0
ENSGALG00000010493	1300	1780	2093	1062	1418	1292	348	585	530	1166	916	1223	121	1	335	1152	946	748	241	269	217	913	866	1425	452	70	309	877	701	564	343	371	97	734	5	861	178	214	209	658	714	729	327	387	281
ENSGALG00000048257	0	4	2	0	0	0	0	0	0	2	5	0	0	3	5	7	0	0	0	0	0	4	0	14	0	0	0	0	0	13	0	2	0	0	0	12	0	0	0	3	4	3	0	0	8
ENSGALG00000020615	719	421	9	242	542	318	167	350	311	235	103	38	87	100	115	7	4	46	11	19	60	32	25	30	33	38	50	16	10	2	20	10	18	19	0	24	12	17	21	10	8	0	10	22	18
ENSGALG00000048255	0	0	0	0	2	0	0	0	0	0	0	0	0	0	0	0	2	0	0	0	0	0	0	0	5	0	0	0	0	0	0	0	0	1	0	0	0	0	0	0	0	0	0	0	0
ENSGALG00000010476	1099	1271	1483	2494	2024	2632	4954	8736	3672	2769	3923	2744	5960	3247	1803	10128	5210	3790	2346	3289	2581	10853	3480	6507	3351	2357	2258	4500	2928	3342	1662	2364	1250	4605	4185	4857	2633	3575	3329	5862	5589	5965	2705	4518	3379
ENSGALG00000010464	847	1069	1444	698	460	747	351	233	452	738	202	905	238	600	241	613	204	537	497	860	218	175	212	545	861	203	385	251	220	571	140	546	180	309	539	257	630	251	763	528	451	152	656	251	549
ENSGALG00000048251	1	1	1	1	0	0	1	0	0	6	0	0	1	1	0	0	1	1	1	1	2	0	0	0	0	0	1	0	0	0	3	0	2	1	0	0	2	0	1	1	0	0	0	0	1
ENSGALG00000021353	0	0	0	0	0	0	0	0	0	0	0	0	0	0	0	0	4	0	0	0	0	0	0	0	0	0	0	0	0	0	0	0	0	0	0	0	0	0	0	0	0	0	0	0	0
ENSGALG00000029832	11	10	17	15	15	25	0	0	3	0	0	9	0	5	3	0	7	2	0	0	0	0	0	0	0	0	0	0	0	0	0	0	0	0	3	0	3	0	5	0	0	0	0	5	3
ENSGALG00000029830	2	3	3	0	0	2	0	2	0	0	0	3	0	0	0	4	5	0	0	0	0	1	0	0	0	0	2	0	0	0	0	0	0	0	0	0	0	0	0	0	0	2	0	0	0
ENSGALG00000027864	748	932	1070	3866	3653	3271	3797	4301	3637	4790	6094	6352	2728	1254	692	16326	9090	8836	1369	2401	1204	11678	9833	10467	2183	2018	2685	13399	12414	7892	4132	876	2654	11635	9053	11124	2776	2654	3140	13192	21579	10356	3260	3416	2601
ENSGALG00000010060	747	1003	1159	710	691	753	585	440	523	703	948	944	648	418	221	916	745	680	181	561	514	900	804	890	843	202	530	755	1009	963	241	397	152	800	1153	1010	293	536	815	750	1584	1326	576	660	467
ENSGALG00000034264	601	758	376	84	410	601	254	164	212	637	328	266	146	278	184	1617	447	434	90	90	111	3964	437	743	151	35	154	508	2231	708	72	194	64	382	302	475	151	188	173	453	486	348	246	164	229
ENSGALG00000010052	184	267	223	133	183	122	94	135	124	156	216	264	54	123	94	264	128	172	70	142	85	184	217	224	93	24	86	156	138	183	53	71	37	212	156	172	89	96	85	321	248	229	180	126	99
ENSGALG00000010046	1867	2487	2693	2323	2556	2677	1934	2469	2003	4305	3740	5573	1045	2826	1843	6423	3665	5109	2279	2637	2874	5836	4050	3804	3292	626	3626	5116	5735	6004	2275	3388	1124	6980	6516	5298	3000	3892	3399	7606	6997	6638	3743	2972	3124
ENSGALG00000023135	428	559	677	278	358	312	175	266	268	645	616	728	87	206	142	739	314	473	89	323	97	466	378	644	205	29	208	480	589	535	160	250	45	567	439	683	247	240	228	627	633	665	382	338	338
ENSGALG00000010034	35	32	31	4	15	31	6	17	4	16	8	18	0	18	1	29	10	9	8	10	7	8	13	14	13	4	10	22	9	6	8	0	0	12	14	0	1	7	14	20	16	15	20	0	9
ENSGALG00000051250	20	10	20	20	18	13	13	5	8	25	33	52	3	23	6	15	19	63	21	3	4	13	31	17	18	2	10	27	53	70	4	6	3	22	32	13	0	9	6	46	17	41	9	5	2
ENSGALG00000052941	12	6	9	4	0	5	0	0	0	18	12	14	0	0	4	3	2	39	14	4	2	7	28	15	3	0	0	8	7	18	6	3	0	3	6	0	0	4	0	0	0	9	0	3	0
ENSGALG00000033647	38	203	343	0	0	12	0	0	0	140	33	347	0	0	0	129	93	85	16	44	0	112	0	146	0	0	0	70	86	0	0	8	0	63	6	92	0	0	18	101	0	56	0	35	0
ENSGALG00000054914	1257	1031	132	2854	3774	222	1646	1684	1167	326	960	490	1180	965	603	501	206	493	354	432	599	72	539	822	675	302	343	637	214	516	408	571	1211	583	417	711	511	498	720	797	748	494	670	976	728
ENSGALG00000053876	3	0	40	0	0	5	0	9	0	6	7	2	5	0	0	4	0	5	0	0	0	3	10	0	0	5	0	0	5	8	0	5	5	7	11	25	0	4	4	8	14	3	6	13	10
ENSGALG00000053877	0	0	0	0	0	0	0	0	0	0	0	0	0	0	0	0	0	0	0	0	0	0	0	0	0	0	0	0	0	0	0	0	0	1	0	0	0	0	0	0	0	0	0	0	0
ENSGALG00000053873	6	0	0	0	2	0	0	2	0	16	5	5	2	2	0	7	4	21	0	0	2	4	3	10	5	2	4	9	0	18	5	4	0	0	0	3	0	2	0	0	0	5	4	2	0
ENSGALG00000010977	10	2	3	0	2	0	0	0	0	2	0	0	0	0	0	0	0	0	0	0	0	0	0	0	0	0	0	0	0	0	0	0	0	0	0	0	0	0	0	0	0	0	0	0	0
ENSGALG00000031164	3	6	7	0	0	0	0	0	0	195	35	0	0	0	0	0	0	0	0	0	0	0	0	0	0	0	0	0	0	0	0	0	0	0	0	0	0	0	0	0	0	0	0	0	0
ENSGALG00000049609	492	599	374	295	330	466	306	220	235	430	159	309	191	238	187	329	277	269	108	30	168	388	336	323	186	269	186	187	363	299	266	233	370	175	253	282	166	231	213	221	244	216	162	245	109
ENSGALG00000008440	160	89	99	81	347	105	20	46	42	16	62	23	16	14	12	20	7	8	2	0	0	11	17	22	6	0	5	19	12	9	6	14	6	18	28	15	0	0	1	4	0	0	0	0	0
ENSGALG00000008436	2439	2818	3737	2837	3493	2926	1076	761	715	3735	992	3745	1880	1870	1243	4890	997	4731	1052	471	534	1481	1224	1971	1853	2028	1643	1285	3794	4468	1508	2010	680	2063	3229	827	1230	507	1124	4278	4997	1319	1277	664	1317
ENSGALG00000008403	910	1097	859	1517	1728	1023	702	1259	420	238	133	1733	553	614	1895	725	1423	1623	1308	1308	992	1865	393	644	2174	241	1761	1538	1418	232	1227	1588	367	1527	680	448	1340	1741	1293	1115	1690	1434	397	1902	1030
ENSGALG00000008393	478	1029	409	339	606	675	38	52	91	657	182	676	137	150	54	63	81	105	52	19	46	113	115	86	27	40	68	119	173	117	55	88	33	54	110	108	24	40	21	105	68	25	42	43	19
ENSGALG00000040527	0	0	3	24	23	51	2	0	0	2	0	0	0	0	0	0	0	4	0	0	0	0	0	0	0	0	0	0	0	0	0	0	0	0	0	0	0	0	0	0	0	0	0	0	0
ENSGALG00000008380	1029	98	108	37	1388	1756	767	861	645	3039	3341	3961	542	774	340	1989	165	3857	642	510	736	1888	1761	2872	740	905	702	3705	3228	3218	1000	946	1670	1562	1963	2167	658	929	918	2048	1784	1830	840	1168	849
ENSGALG00000030732	116	195	184	94	70	127	115	69	130	79	63	88	71	53	47	66	53	75	101	48	120	97	87	130	125	302	104	151	93	232	75	144	279	78	151	185	132	253	180	158	187	124	255	306	211
ENSGALG00000008421	416	465	543	329	285	444	250	336	266	391	246	352	350	280	209	270	301	432	149	252	167	320	222	320	152	159	162	254	290	199	342	216	237	185	229	243	124	114	156	259	188	191	147	189	129
ENSGALG00000008418	91	124	140	960	939	1348	684	640	459	378	89	94	168	693	746	93	57	84	172	79	197	113	72	101	301	177	278	74	119	77	431	248	449	47	68	25	145	172	126	90	37	67	138	216	201
ENSGALG00000051736	2	2	8	0	3	0	0	5	0	2	0	3	0	0	0	2	4	3	11	0	4	8	6	0	0	0	0	0	0	0	0	0	0	4	0	0	0	2	0	0	4	2	0	0	0
ENSGALG00000053292	0	0	0	2	0	0	0	0	0	0	0	0	0	0	0	0	0	0	0	0	0	0	0	0	0	0	0	0	0	0	0	0	0	2	2	0	0	4	0	0	0	0	0	0	0
ENSGALG00000053293	0	4	7	0	0	2	0	0	0	0	0	0	0	0	0	0	2	0	0	0	0	0	0	0	0	0	0	0	0	0	0	0	0	0	0	16	0	0	0	0	0	0	0	0	0
ENSGALG00000053291	0	0	2	0	0	2	0	0	2	0	0	0	0	0	0	2	0	0	0	0	0	0	0	9	0	0	0	0	0	0	0	0	0	0	0	0	0	0	0	0	2	0	0	0	0
ENSGALG00000053297	0	0	0	0	0	0	0	0	0	11	0	4	0	0	0	0	0	0	0	0	0	0	0	0	0	0	0	0	0	0	0	0	0	0	0	0	0	0	0	0	0	0	0	0	0
ENSGALG00000053295	1	0	0	3	0	0	0	0	0	1	4	0	0	0	0	0	1	0	0	0	0	0	0	0	0	0	0	0	0	0	0	0	0	0	0	0	0	0	0	0	0	0	0	1	0
ENSGALG00000053298	2	2	0	3	2	3	0	0	0	0	0	0	0	0	0	0	0	0	0	0	0	2	0	0	0	0	0	0	0	0	0	0	0	0	0	0	0	0	0	0	0	0	0	0	0
ENSGALG00000054477	25	5	8	5	6	7	3	0	0	0	0	0	0	0	0	0	0	3	4	0	2	0	0	0	0	0	0	0	3	0	2	0	0	0	0	0	4	2	0	0	0	0	11	0	0
ENSGALG00000054476	0	0	0	0	0	0	0	0	0	0	0	0	0	0	0	0	0	0	0	0	0	0	0	0	0	0	0	0	0	0	0	0	0	4	0	0	0	3	1	0	0	0	0	0	0
ENSGALG00000054474	5	4	0	0	0	6	0	0	0	0	0	0	0	0	0	0	0	0	0	0	0	0	0	0	0	0	0	0	0	0	0	0	0	0	0	0	0	0	0	0	0	0	0	0	0
ENSGALG00000054479	6	14	13	0	6	13	0	0	0	6	0	0	0	0	0	0	2	0	3	0	0	0	0	0	0	0	7	4	3	0	7	2	0	0	0	0	0	8	2	0	0	0	0	0	0
ENSGALG00000054478	0	0	0	0	0	3	0	0	0	0	0	0	0	0	0	0	0	0	0	0	0	0	0	0	0	0	0	0	0	0	0	0	0	33	3	0	1	3	0	0	0	0	0	0	0
ENSGALG00000052548	0	0	0	0	0	0	0	0	0	0	0	0	0	0	0	0	0	0	0	0	0	0	0	0	0	0	2	0	0	0	0	0	0	0	0	0	0	0	0	0	0	0	0	0	0
ENSGALG00000020554	153	149	25	253	399	478	96	75	68	26	0	15	69	55	15	24	14	6	43	17	20	76	38	42	67	21	74	25	16	29	87	34	9	6	12	6	12	19	18	32	3	2	12	10	5
ENSGALG00000028298	107	55	83	23	5	13	0	15	14	31	12	25	3	0	3	0	6	8	0	7	0	4	6	6	0	0	0	0	0	0	2	2	0	0	2	0	2	0	0	4	0	0	0	3	0
ENSGALG00000015101	106	1202	1280	540	644	642	261	252	305	753	498	620	105	102	153	402	398	253	157	123	149	360	254	240	122	54	187	227	179	227	217	170	58	110	210	198	74	103	92	344	251	235	168	153	35
ENSGALG00000049992	605	583	1084	588	602	719	466	400	742	2773	1174	633	75	510	456	64	427	35	232	141	170	79	69	49	286	47	230	338	41	45	278	157	88	23	88	85	170	380	69	85	92	21	366	299	274
ENSGALG00000015103	137	135	63	31	45	79	20	29	29	89	39	58	0	14	14	51	68	96	10	8	4	51	33	33	45	0	6	48	37	8	21	11	0	33	31	31	6	16	8	46	17	30	5	16	0
ENSGALG00000011612	6	0	818	0	19	14	0	0	0	171	3	0	24	0	0	69	0	0	0	1	0	0	801	0	0	0	0	4	595	23	0	0	0	0	0	0	0	0	0	0	0	8	0	12	0
ENSGALG00000011623	737	582	560	189	256	372	27	87	63	331	109	384	30	117	30	67	71	61	51	11	40	84	132	139	47	2	55	140	68	96	37	20	6	29	66	52	11	14	6	97	61	41	41	44	2
ENSGALG00000050902	3	0	4	0	0	2	0	0	0	0	7	0	0	3	0	5	2	0	0	0	0	2	0	0	0	0	0	0	0	1	0	0	0	0	0	0	0	0	0	0	0	0	0	6	0
ENSGALG00000011626	109	96	240	140	113	144	86	106	86	86	89	52	49	37	34	76	90	26	4	36	20	61	28	58	53	9	27	55	43	61	24	39	76	45	58	60	28	70	42	67	62	31	46	54	31
ENSGALG00000015091	716	826	550	195	240	281	108	126	132	357	120	203	24	157	89	165	98	108	67	7	41	98	141	140	80	4	75	111	86	131	57	31	14	58	115	87	107	85	41	91	103	117	119	50	265
ENSGALG00000027314	0	0	0	0	0	6	0	0	0	3	0	2	0	0	0	2	2	2	10	0	6	0	0	0	18	0	2	0	0	0	4	0	0	0	0	0	53	11	12	0	2	5	14	3	216
ENSGALG00000013858	183	152	232	21	72	99	26	58	41	187	135	161	33	51	34	85	78	99	25	38	43	79	51	102	56	15	54	49	75	68	30	40	23	49	56	31	28	34	26	41	47	49	48	25	31
ENSGALG00000048864	9	9	9	0	2	16	0	0	0	15	8	6	5	3	0	3	4	0	0	3	7	6	4	10	5	0	2	0	0	13	3	6	0	2	0	3	6	6	2	0	0	0	1	3	1
ENSGALG00000007000	2013	3687	6990	3521	3519	2672	1564	1165	1346	324	1238	402	592	922	1374	300	1833	1811	437	764	94	4226	2612	3483	77	210	134	1991	774	1647	750	678	369	2121	803	1238	436	239	685	1199	2848	2486	645	635	466
ENSGALG00000023122	9	18	46	13	15	19	27	43	34	128	350	184	82	10	4	149	194	151	10	20	26	117	46	120	35	5	18	62	13	13	2	5	0	19	23	44	7	0	0	0	64	77	9	30	11
ENSGALG00000049162	4	3	0	0	0	3	0	3	0	0	0	0	0	0	0	1	2	3	0	0	0	7	3	5	3	0	0	0	3	0	0	0	0	10	7	0	0	2	0	0	0	6	0	0	0
ENSGALG00000028916	0	0	3	0	1	0	0	0	0	1	0	1	0	0	0	0	1	4	0	0	0	0	0	0	0	0	0	0	1	0	0	0	0	0	0	0	0	0	0	0	0	0	0	0	0
ENSGALG00000047667	2	13	25	9	10	22	18	23	7	15	11	24	4	4	7	16	15	10	2	7	5	17	31	32	10	0	3	12	13	13	7	4	1	3	4	8	0	0	1	7	20	0	0	9	0
ENSGALG00000030510	20	36	24	0	20	15	0	3	10	17	12	20	0	0	3	23	16	6	5	6	0	11	29	41	12	0	3	4	6	10	7	5	2	0	2	2	0	4	7	0	6	4	0	7	0
ENSGALG00000049552	0	2	3	3	0	0	0	0	0	2	0	0	0	0	0	0	0	0	0	0	0	0	0	0	3	0	0	0	0	0	0	0	0	0	0	0	0	0	0	0	0	0	0	0	0
ENSGALG00000013867	617	698	789	255	411	415	211	287	262	543	388	657	135	226	123	613	463	498	121	168	127	478	334	533	204	19	162	316	462	330	144	187	46	501	526	625	91	178	143	457	567	402	242	231	150
ENSGALG00000030157	29	44	41	13	19	15	7	10	6	88	35	16	3	6	6	26	26	9	0	0	4	18	18	20	11	2	9	22	19	13	6	0	3	3	6	11	9	7	2	10	6	8	0	7	0
ENSGALG00000041838	6	14	46	9	16	10	6	8	0	0	0	5	0	4	0	8	11	6	3	3	2	13	7	12	5	0	0	5	9	0	0	2	3	0	5	0	0	4	8	0	2	5	8	3	0
ENSGALG00000053127	0	0	0	0	0	0	0	0	0	0	0	0	0	0	0	0	0	0	0	0	0	0	0	0	0	0	0	0	0	0	0	0	0	0	0	0	0	0	1	0	0	4	0	0	0
ENSGALG00000053123	0	0	0	0	0	0	0	2	0	0	0	0	0	0	0	2	0	0	0	0	2	2	0	0	0	0	0	0	0	0	0	0	0	0	0	0	0	0	0	0	0	0	0	0	0
ENSGALG00000043611	36	54	43	16	11	5	10	30	14	14	4	13	3	23	17	4	6	20	11	17	35	4	16	12	50	3	25	0	4	3	52	33	6	0	0	0	37	20	23	0	8	0	63	58	33
ENSGALG00000051466	297	177	133	119	123	170	108	82	81	118	50	113	69	124	86	170	149	97	75	39	98	145	164	107	148	29	108	83	154	100	44	67	16	89	86	77	84	143	71	96	76	72	104	73	72
ENSGALG00000011684	3	4	10	0	2	0	0	2	0	21	20	34	0	0	0	40	37	40	2	12	10	47	29	47	19	0	9	18	25	0	0	21	0	7	16	13	12	29	7	19	0	8	18	40	27
ENSGALG00000050745	1	1	1	0	1	0	0	0	0	1	1	2	0	0	0	0	0	0	0	0	0	1	0	0	0	0	1	0	0	0	0	0	0	0	0	0	0	0	0	0	0	0	1	0	0
ENSGALG00000016905	23	34	26	56	75	64	13	29	13	4	2	6	0	7	2	18	2	78	3	10	13	24	26	17	11	6	15	26	91	66	9	15	14	0	1	0	17	3	4	45	0	29	6	8	2
ENSGALG00000013814	121	175	151	113	158	187	75	91	70	86	30	83	47	92	53	60	29	60	100	31	142	47	57	106	77	22	173	50	65	90	128	123	50	17	20	21	193	332	197	20	28	22	188	168	115
ENSGALG00000054461	10	10	22	0	21	40	4	3	5	3	11	0	0	22	6	0	0	0	9	0	0	0	0	0	14	0	0	0	0	0	0	0	0	0	0	0	0	0	0	0	0	0	0	0	0
ENSGALG00000011812	97	94	245	393	328	438	363	707	356	1157	1609	2054	534	79	44	1890	1234	1697	28	253	85	1381	818	985	190	109	132	1297	797	2158	93	80	124	1010	1481	1646	39	161	169	1455	1452	1259	83	174	46
ENSGALG00000039477	3	0	0	0	0	0	2	0	0	9	0	5	0	0	3	0	3	2	0	0	0	0	4	0	0	0	0	0	6	5	2	0	0	0	0	2	0	6	0	0	0	0	0	0	2
ENSGALG00000039479	0	0	0	0	2	0	0	0	0	0	0	0	0	0	0	0	0	0	0	0	0	0	0	0	0	0	0	0	0	0	0	0	0	0	0	0	0	0	0	0	0	0	0	0	0
ENSGALG00000024024	0	0	5	0	6	0	0	0	0	0	0	0	0	0	0	0	2	0	0	0	0	0	0	0	0	0	0	0	0	0	0	0	0	0	0	0	0	2	0	0	0	0	0	0	0
ENSGALG00000016469	0	2	0	0	0	0	0	0	0	0	0	0	0	0	0	2	0	4	9	3	0	0	0	0	0	0	0	0	0	0	0	0	0	4	0	0	0	3	2	0	0	0	0	0	0
ENSGALG00000051276	886	1212	1687	816	625	994	365	442	307	307	248	414	585	364	299	641	560	486	680	455	448	549	388	511	506	510	509	498	495	512	554	655	961	453	536	392	517	577	505	611	536	406	434	582	679
ENSGALG00000048178	91	145	796	931	1503	1245	519	715	441	0	138	0	261	7	0	32	210	21	14	4	99	539	420	307	7	0	0	373	21	222	0	0	205	260	216	240	33	60	69	246	363	161	117	123	28
ENSGALG00000027046	214	187	338	175	356	382	208	196	192	157	180	132	66	18	23	70	49	17	76	27	45	114	64	104	22	9	70	123	106	133	108	62	140	85	49	107	26	131	152	160	40	120	56	92	81
ENSGALG00000011866	372	474	789	534	355	526	596	655	617	274	459	388	618	212	251	554	313	380	171	488	162	357	184	476	196	215	274	293	370	254	250	300	437	237	203	337	238	264	319	419	200	282	309	272	246
ENSGALG00000025388	0	0	7	0	1	2	0	0	0	0	3	0	1	0	0	0	6	0	0	0	0	12	5	6	0	0	0	2	1	11	0	0	1	4	5	5	0	0	0	6	8	3	0	4	0
ENSGALG00000048707	3	2	15	7	10	9	24	28	7	12	12	2	10	3	5	2	19	2	4	1	12	12	6	5	2	1	6	6	9	13	7	1	4	5	4	20	8	17	3	5	7	5	30	13	5
ENSGALG00000049516	220	144	399	203	278	266	350	454	138	108	633	142	239	61	28	123	415	129	54	18	184	262	225	409	48	59	104	177	43	188	63	38	128	174	138	450	212	262	105	140	146	166	256	374	127
ENSGALG00000050848	26	24	26	11	10	10	0	5	2	6	12	27	0	3	0	25	15	20	0	0	4	6	14	0	0	0	0	17	16	11	5	5	0	19	28	12	0	10	0	24	43	26	0	0	3
ENSGALG00000011894	1505	1945	2486	2540	2324	2169	2556	4161	1077	6190	2781	2113	1867	633	426	7192	3654	3311	655	1087	640	6898	2678	5697	1254	451	1169	3521	2510	1702	660	547	160	1849	1885	1686	413	515	682	3535	2319	2916	487	820	249
ENSGALG00000035223	160	192	339	390	174	278	637	621	653	170	220	253	842	278	272	213	252	238	192	623	534	270	137	212	420	253	242	279	182	223	345	345	520	222	164	306	379	263	766	268	209	204	542	462	427
ENSGALG00000047778	5	0	2	0	0	0	0	0	0	11	0	8	0	3	0	19	3	2	0	0	0	0	5	0	0	0	0	9	2	0	4	0	0	0	0	0	0	12	0	16	0	8	0	0	2
ENSGALG00000007227	507	439	527	175	157	203	102	105	135	153	109	112	76	132	98	134	100	99	68	23	87	118	126	162	69	54	67	107	90	103	118	158	69	87	81	69	91	105	88	117	69	75	86	116	67
ENSGALG00000007195	435	704	892	523	629	470	456	492	455	435	468	604	377	315	183	532	499	473	207	444	322	707	429	533	371	258	321	458	419	367	262	406	301	440	320	523	432	334	541	791	537	461	483	383	400
ENSGALG00000007199	994	1271	1359	913	933	897	814	960	899	967	890	983	632	841	605	1739	757	1276	457	428	679	1075	1149	1077	692	315	482	1359	1185	1573	542	851	527	1481	1352	1399	825	781	681	1653	1623	1307	704	750	666
ENSGALG00000020999	487	496	880	443	406	370	152	43	228	109	103	35	126	204	169	15	39	42	65	189	171	24	34	21	148	94	106	47	40	25	163	157	174	49	46	31	51	53	88	53	45	31	106	52	65
ENSGALG00000049499	2	7	5	2	5	2	7	0	3	7	3	6	0	1	4	0	1	3	0	0	0	0	0	5	1	0	0	0	0	4	1	0	1	3	0	0	0	0	0	0	4	1	0	1	0
ENSGALG00000052455	0	0	0	0	0	0	0	0	0	0	0	0	0	0	0	0	0	0	0	0	0	0	0	0	0	0	0	0	0	0	0	0	0	0	0	0	0	0	0	0	0	0	0	4	0
ENSGALG00000046877	129	604	922	727	172	197	927	145	165	139	570	384	89	616	296	118	102	63	129	395	316	102	106	158	68	292	377	126	325	200	57	44	400	222	51	334	332	90	320	243	220	62	81	318	271
ENSGALG00000047772	17	4	4	5	8	14	9	3	3	22	0	5	3	8	3	15	9	0	0	0	0	13	0	10	6	0	3	0	8	3	3	0	0	0	3	0	0	5	0	0	12	0	0	0	4
ENSGALG00000052458	1	1	0	0	0	0	0	0	0	2	0	0	0	0	0	0	0	1	0	0	0	0	0	0	0	0	0	0	0	1	0	0	0	0	0	0	0	0	0	0	0	0	0	0	0
ENSGALG00000047774	0	0	0	0	0	0	0	0	0	0	0	0	0	0	0	0	0	0	0	0	0	0	0	0	0	0	0	0	0	0	0	0	0	2	0	0	0	0	0	0	0	0	0	0	0
ENSGALG00000007244	188	238	308	341	325	311	310	275	257	230	243	318	252	288	187	205	229	230	311	360	292	150	87	140	211	362	339	149	146	139	333	389	410	53	126	75	301	99	182	150	95	69	205	179	283
ENSGALG00000017906	0	0	0	1	1	0	0	0	0	0	0	0	1	0	0	0	1	0	0	0	0	0	0	0	0	0	0	0	0	0	0	0	0	0	0	0	2	0	0	0	0	0	0	0	0
ENSGALG00000000608	36	16	534	6	6	23	0	10	0	687	704	38	11	2	5	41	20	16	0	0	4	55	58	0	5	3	2	8	109	12	0	8	4	5	8	6	3	4	2	9	8	15	8	15	8
ENSGALG00000052984	0	1	0	0	0	0	0	0	0	0	0	0	0	0	0	0	0	0	0	0	0	0	0	0	0	0	0	0	0	0	0	0	0	0	0	0	0	0	0	0	0	0	0	0	0
ENSGALG00000052981	0	0	0	0	0	0	0	0	0	0	0	0	0	0	0	0	0	0	0	0	0	0	0	0	0	0	0	0	0	0	0	0	0	0	0	0	0	2	0	0	0	0	0	0	0
ENSGALG00000052982	0	2	6	0	0	0	0	0	0	5	0	0	0	0	0	0	0	0	0	0	0	0	0	0	0	0	0	0	0	0	0	0	0	0	0	0	0	0	0	0	0	0	0	0	0
ENSGALG00000052988	0	0	0	0	0	0	0	0	0	0	0	2	0	0	0	0	0	0	0	0	0	0	0	0	0	0	0	0	0	0	0	0	0	0	2	0	0	0	0	0	0	0	0	0	0
ENSGALG00000011166	5	3	0	0	6	0	0	0	0	4	0	5	0	0	0	1	3	3	0	0	0	5	0	5	0	0	0	0	0	0	3	0	0	0	3	2	0	3	3	0	0	0	0	0	8
ENSGALG00000040270	973	914	1368	849	924	1102	776	759	734	670	640	549	700	435	189	550	848	433	187	87	312	780	892	1111	330	276	212	656	272	522	275	214	465	503	602	648	282	320	352	631	605	574	214	394	243
ENSGALG00000050589	0	0	0	0	0	0	0	0	0	0	0	0	0	0	0	0	0	0	0	0	0	0	4	0	0	0	0	0	0	0	0	0	0	0	0	0	0	0	0	0	0	0	0	0	0
ENSGALG00000012863	128	171	238	125	158	209	86	127	109	126	73	72	53	33	22	63	86	102	13	7	36	93	85	129	30	20	27	53	55	96	28	26	27	25	46	16	17	19	7	66	29	23	32	27	12
ENSGALG00000050584	3	0	5	8	6	0	0	0	0	0	0	0	0	0	0	0	3	0	0	0	0	4	0	0	0	0	0	0	0	0	0	0	0	0	0	0	0	0	0	0	0	0	0	0	0
ENSGALG00000050583	0	1	0	0	0	0	0	0	0	0	0	0	0	0	0	0	0	1	0	0	0	0	0	0	0	0	0	0	0	0	0	0	0	0	0	0	0	0	0	0	0	0	0	0	0
ENSGALG00000000836	125	127	168	135	125	161	19	45	34	104	87	115	43	38	17	55	52	68	17	0	9	62	50	75	30	22	15	28	52	54	59	26	10	45	37	41	6	32	13	33	60	43	20	30	4
ENSGALG00000001889	64	92	131	25	74	63	13	9	10	121	90	102	17	10	8	91	253	153	10	6	22	84	57	174	28	3	23	26	79	18	14	23	11	11	49	47	3	39	0	79	8	41	11	12	19
ENSGALG00000001921	567	550	690	279	410	451	310	407	335	412	185	363	257	213	141	455	298	296	101	49	137	327	468	477	214	48	192	305	386	389	172	191	125	201	348	340	110	181	123	394	278	311	169	142	114
ENSGALG00000001950	461	597	703	680	491	743	996	406	644	317	183	366	293	597	316	327	258	297	116	72	168	368	386	274	222	97	174	281	298	319	168	260	167	198	319	344	250	329	206	276	253	259	283	301	343
ENSGALG00000024034	1573	1072	1752	1739	1762	1808	1274	971	914	1534	554	1242	997	978	537	1646	555	712	584	238	519	1715	2257	1193	255	767	588	2047	1694	2371	382	669	815	1399	2648	1878	445	591	580	1912	2479	1643	363	546	257
ENSGALG00000002364	1524	1816	699	1177	1017	1417	588	558	539	1759	254	914	378	883	405	857	588	407	412	35	294	852	978	505	495	184	435	669	1064	881	427	478	120	410	790	452	429	521	376	384	422	445	220	367	246
ENSGALG00000002375	3553	1423	2496	794	2109	1266	679	752	326	1575	936	1689	445	517	418	1500	1402	448	405	354	311	1278	2209	2128	797	424	672	992	545	1294	1080	836	301	1477	357	1838	468	494	639	1704	648	1288	677	560	443
ENSGALG00000018276	2	0	0	0	0	2	1	2	4	2	5	5	1	3	1	2	3	3	2	1	1	2	2	0	4	0	1	2	1	0	0	1	0	4	1	0	0	0	0	2	2	0	0	0	1
ENSGALG00000043499	354	373	474	750	702	992	426	549	371	561	549	1008	299	158	115	847	699	1045	159	269	147	1067	857	1290	232	266	367	594	822	677	394	235	226	541	398	840	184	141	85	944	545	514	209	130	99
ENSGALG00000000866	699	762	660	503	446	631	522	443	181	2737	2093	2886	644	133	99	3792	2211	3362	154	351	325	1133	1727	2145	362	298	294	620	1688	1530	299	222	257	2041	1711	2416	133	219	434	2537	3244	2805	208	297	160
ENSGALG00000001797	229	225	250	321	499	517	127	244	148	149	51	189	73	53	35	277	224	232	41	15	30	282	236	344	71	26	50	254	197	153	60	51	31	121	149	133	21	50	44	133	105	121	36	44	20
ENSGALG00000048117	153	150	410	211	292	312	125	187	131	99	282	189	266	40	41	224	186	242	33	41	201	287	239	219	62	80	60	214	179	312	72	96	493	183	129	253	112	79	198	252	166	147	118	86	77
ENSGALG00000051180	0	0	5	0	0	0	0	0	0	0	0	0	0	0	0	0	0	3	0	0	0	10	0	34	0	0	0	0	6	7	0	0	0	0	0	0	0	0	0	0	7	0	5	0	0
ENSGALG00000051181	0	0	0	0	0	0	0	0	0	0	0	0	0	0	0	0	0	0	0	0	0	0	0	0	0	0	0	0	0	7	0	0	0	0	0	0	0	0	0	0	0	0	0	0	0
ENSGALG00000051182	5	1	1	0	4	2	0	0	0	2	0	0	0	0	0	0	0	0	0	0	0	3	0	0	0	0	0	7	0	0	0	0	0	0	0	0	0	0	0	4	0	5	0	0	0
ENSGALG00000037671	48	55	45	212	208	313	208	73	76	20	4	30	44	104	146	4	16	18	3	0	15	6	10	10	9	9	0	0	10	11	15	2	4	3	5	0	2	0	0	15	13	6	0	6	0
ENSGALG00000051186	2	0	0	0	0	0	0	0	0	0	0	0	0	0	0	0	0	0	0	0	0	0	0	0	0	0	0	0	0	0	0	0	0	0	0	0	0	0	0	0	0	0	0	0	0
ENSGALG00000036365	2221	2386	2402	1451	2021	1999	1233	1435	1075	665	398	800	1250	1017	383	784	505	554	439	203	319	824	705	790	425	323	435	434	456	436	221	212	173	324	589	482	120	254	150	388	336	375	186	183	138
ENSGALG00000046912	0	0	7	6	0	0	0	4	0	0	0	0	0	0	0	0	0	0	0	0	0	0	0	0	0	0	0	0	0	4	0	0	0	0	0	0	0	0	0	0	0	0	0	0	0
ENSGALG00000046911	0	1	0	0	0	0	0	0	0	0	0	0	0	0	0	0	0	0	0	0	0	0	0	0	0	0	0	0	0	0	0	0	0	0	0	0	0	0	0	0	0	0	0	0	0
ENSGALG00000046910	0	0	0	1	0	0	0	0	0	0	0	0	0	0	0	0	0	0	0	0	0	0	0	0	0	0	0	0	0	0	0	0	0	0	0	0	0	0	0	0	0	0	0	0	0
ENSGALG00000046917	0	0	0	0	0	0	0	0	0	0	0	0	0	0	0	0	6	0	0	0	0	0	0	0	0	0	0	0	0	0	0	0	0	0	0	0	0	0	0	0	0	0	0	0	0
ENSGALG00000046919	0	0	0	0	0	0	0	0	0	0	0	0	0	0	0	0	0	0	0	0	0	0	0	0	0	0	0	0	0	0	0	2	0	0	0	0	0	0	0	0	0	0	0	0	0
ENSGALG00000001869	8	12	3	8	4	7	0	0	0	8	0	0	0	4	2	0	0	0	0	0	0	0	0	0	0	0	0	0	4	0	0	0	0	0	0	0	0	0	0	0	0	0	0	0	0
ENSGALG00000001866	0	0	2	0	0	0	0	0	0	0	0	0	0	2	0	0	0	0	0	0	0	0	0	0	0	0	0	0	0	0	0	0	0	0	0	0	0	0	0	0	0	0	0	0	0
ENSGALG00000000400	12	44	11	35	22	25	15	17	48	108	25	112	26	15	24	13	15	31	21	4	20	17	9	0	5	19	20	4	0	0	10	7	12	0	2	7	0	4	10	0	4	0	0	0	0
ENSGALG00000031323	103	87	115	45	61	107	44	51	23	132	64	87	4	26	13	191	76	84	24	13	11	93	69	86	48	4	45	101	111	48	35	36	10	43	126	65	16	32	15	139	116	105	38	37	10
ENSGALG00000041404	7	11	17	0	0	5	0	0	0	8	0	0	0	0	0	0	0	0	0	0	0	0	8	0	0	0	0	0	3	0	0	0	0	0	0	0	0	3	0	0	0	5	0	0	0
ENSGALG00000032544	1351	1734	2297	1117	1002	1766	1694	817	1460	2329	1248	1694	212	2072	1190	2318	1185	1298	574	657	797	2193	1526	1982	954	139	899	1460	1632	1941	1052	944	311	1520	1955	1678	1519	1308	1120	1646	2726	1389	1493	1585	1429
ENSGALG00000029836	23	8	17	4	3	6	2	3	0	9	10	7	6	6	3	13	0	3	7	0	2	6	4	0	8	0	1	8	0	0	0	3	2	1	3	3	0	2	2	2	19	7	0	8	2
ENSGALG00000031754	540	734	384	2874	2190	2246	878	1830	1261	70	57	88	361	405	674	170	261	159	367	293	223	89	46	273	394	391	417	46	89	114	297	398	237	16	44	10	422	404	246	25	17	20	372	842	309
ENSGALG00000031461	855	235	606	433	482	545	377	447	321	790	244	396	115	501	241	674	351	324	274	175	131	533	371	507	348	31	307	314	307	339	271	230	56	254	281	347	205	294	224	366	383	318	227	277	226
ENSGALG00000042534	1477	1375	659	2662	2178	3029	3023	1214	1602	2539	785	1944	944	4711	1275	2676	2140	1015	2048	939	1884	1049	4575	1729	1704	827	3491	2124	8325	2596	2074	3082	842	3227	6817	4421	1551	1652	983	3236	2764	1528	935	1191	992
ENSGALG00000053750	0	0	0	0	1	0	0	0	0	1	0	0	0	0	0	1	0	0	1	0	0	1	0	1	0	0	0	0	0	0	0	0	0	1	0	0	0	0	0	0	0	1	0	0	0
ENSGALG00000040084	48	63	69	66	78	64	64	57	54	80	27	65	9	49	50	92	61	36	22	22	28	47	64	55	41	14	25	45	68	35	24	33	23	43	52	36	38	56	29	36	55	42	52	27	45
ENSGALG00000042454	7	0	32	61	3	3	0	0	13	23	12	13	0	0	6	12	9	0	0	3	0	0	0	0	0	0	3	0	26	4	0	0	0	9	0	0	0	2	2	0	0	0	0	0	0
ENSGALG00000028424	5	0	8	0	0	0	0	0	0	1160	381	312	0	0	0	10	169	23	0	0	0	14	0	0	0	0	0	33	15	0	0	0	0	0	0	0	0	0	0	4	0	0	0	0	0
ENSGALG00000010781	0	0	0	0	3	0	0	0	0	0	0	0	2	0	0	0	0	0	0	3	0	7	0	0	7	0	0	0	0	7	0	0	0	0	0	0	0	0	0	1	0	0	0	0	0
ENSGALG00000042119	2	0	4	0	0	0	0	0	0	0	5	0	0	0	0	0	0	0	0	0	0	0	0	0	0	0	0	0	0	0	0	0	0	0	0	0	0	0	0	0	0	0	0	0	0
ENSGALG00000042116	11	26	36	8	10	40	14	12	8	12	0	3	2	11	9	0	0	5	0	0	0	36	0	5	12	0	22	0	0	0	6	3	3	14	3	0	5	0	0	0	5	0	0	0	0
ENSGALG00000045327	1	1	1	0	0	1	0	0	0	24	1	12	0	0	0	1	6	2	1	0	1	4	2	0	0	1	0	17	1	1	0	0	0	0	2	0	0	0	0	17	1	0	1	0	0
ENSGALG00000016878	1336	1519	1503	1016	1254	1230	839	959	869	2233	1494	2292	231	615	407	2436	1359	1799	623	760	499	1748	1284	2087	794	124	622	1315	1555	1220	445	481	113	1233	1241	1381	374	517	298	1811	1278	1617	611	574	740
ENSGALG00000003042	487	533	707	389	338	375	402	1	311	690	480	3005	543	435	210	635	1442	699	605	1	111	456	1584	1928	391	1705	1148	2197	602	2448	830	1240	1286	1208	1643	60	382	108	1105	1872	12	397	1222	1264	242
ENSGALG00000027826	1	2	0	0	1	0	0	0	1	1	0	1	0	0	0	1	0	0	0	0	0	0	0	0	0	0	1	0	0	0	0	0	0	0	0	0	0	0	0	0	0	0	0	0	0
ENSGALG00000002968	265	350	381	108	189	196	108	120	101	225	142	249	152	86	75	243	153	59	48	58	55	234	180	196	91	57	156	174	133	168	82	68	81	87	70	58	25	61	52	77	68	96	49	50	40
ENSGALG00000002095	1478	1948	3093	1860	1893	2021	1507	1285	1457	1958	3052	2603	1220	1434	861	2765	2274	2228	491	1991	1453	3374	2798	3546	1209	175	950	3500	2312	3041	658	1174	565	3477	3160	4008	2106	1572	2033	5114	4450	3261	2436	2042	2500
ENSGALG00000033696	2145	2574	2759	7359	384	5634	14095	1074	757	220	60	93	17230	12788	5695	21	416	54	6586	3603	5066	68	12	17	9267	4001	3773	30	24	52	2338	2739	3978	10	4	10	2589	2047	2478	7	4	24	1510	2539	1709
ENSGALG00000033196	2899	3849	3908	1722	1790	2057	1277	1298	1571	2062	1371	2069	923	2569	2400	1906	1307	1234	1761	3088	2951	1048	958	1518	4073	407	3911	1129	1339	1252	1806	2662	671	1206	1262	1422	3491	3489	3627	1638	1656	1091	3509	4382	2998
ENSGALG00000039101	144	180	203	0	4	6	0	0	0	4	0	8	0	4	0	0	12	0	0	0	0	0	0	0	0	0	0	0	0	0	0	0	0	0	0	0	0	2	0	0	0	0	3	0	0
ENSGALG00000033349	8	11	10	1	13	2	0	1	4	1	0	0	1	0	0	2	1	1	0	1	0	1	1	1	0	0	0	0	0	0	0	0	0	2	0	0	0	0	0	0	0	1	0	0	0
ENSGALG00000033677	9785	11490	11781	18660	18086	13792	4884	4947	3649	418	415	873	3080	2704	1274	509	275	403	602	570	686	328	588	506	488	1206	3169	289	634	176	348	418	441	123	287	230	170	315	211	994	268	117	210	204	149
ENSGALG00000040474	284	312	204	150	197	256	98	144	142	270	62	162	30	174	121	245	144	171	103	34	49	191	221	224	126	28	97	131	158	124	102	88	11	99	163	132	48	132	77	89	98	140	85	92	82
ENSGALG00000016881	629	841	493	450	570	568	69	80	73	369	192	430	61	90	55	300	289	228	18	45	31	321	267	428	89	30	187	241	468	145	111	66	20	293	364	258	39	118	84	201	266	225	68	167	66
ENSGALG00000033417	0	1	4	0	5	3	0	0	3	0	1	1	0	2	0	8	1	0	0	0	1	1	0	1	4	3	3	0	0	0	3	0	2	1	0	0	0	3	3	0	2	0	0	7	0
ENSGALG00000033415	0	0	0	0	0	0	0	0	0	0	0	0	0	0	0	0	0	0	6	0	0	0	0	0	0	0	0	0	0	0	0	0	0	3	0	0	0	0	0	0	0	0	0	0	0
ENSGALG00000033411	3	2	2	2	3	0	0	0	5	2	0	2	4	0	0	2	2	0	0	0	0	0	0	7	8	0	0	0	2	0	8	0	0	0	0	0	0	0	0	0	0	0	0	0	0
ENSGALG00000048014	0	0	0	0	0	0	0	0	0	0	1	0	0	0	0	0	0	2	0	0	0	0	0	0	0	0	0	0	0	0	0	0	0	0	0	0	0	0	0	0	0	0	0	0	0
ENSGALG00000048010	3	0	2	0	0	0	0	0	0	0	0	0	0	0	0	0	0	0	0	0	0	0	0	0	0	0	0	0	0	0	0	0	0	0	0	0	0	0	0	0	0	0	0	0	0
ENSGALG00000033419	0	0	0	0	0	0	0	0	0	0	0	0	0	0	0	0	0	0	0	0	0	0	0	0	0	0	0	0	0	0	0	0	0	0	0	0	0	0	0	0	10	0	0	0	0
ENSGALG00000001764	0	0	0	0	0	0	0	0	0	3	0	3	4	0	0	0	0	7	0	0	0	0	0	0	0	0	0	0	0	0	0	0	0	0	2	0	0	0	2	0	6	0	0	0	0
ENSGALG00000034197	0	0	0	0	0	0	0	0	0	0	0	2	0	0	0	0	0	0	0	0	0	0	0	0	0	0	0	0	0	0	0	0	0	0	0	0	0	0	0	0	0	0	0	0	0
ENSGALG00000011570	389	412	691	241	270	270	187	281	250	192	217	254	184	126	95	228	158	232	71	181	99	192	677	212	120	80	573	712	166	174	123	110	162	176	135	280	79	94	117	274	221	182	95	125	92
ENSGALG00000043931	2	23	7	0	0	2	2	0	2	4	4	6	0	1	0	17	8	3	3	5	0	9	12	3	0	1	4	0	13	4	2	4	0	12	5	0	4	1	1	0	2	0	2	0	2
ENSGALG00000047232	0	0	0	0	0	0	0	0	0	0	0	0	0	0	0	0	0	0	0	0	0	0	0	0	3	0	2	0	0	0	0	0	0	0	0	0	0	0	0	0	0	0	0	0	0
ENSGALG00000047237	0	0	0	0	0	0	0	0	0	0	0	0	0	0	0	0	0	0	0	0	0	0	0	0	0	0	0	0	0	0	0	0	0	0	10	0	0	0	0	0	0	0	0	0	0
ENSGALG00000047239	0	0	0	0	0	0	0	0	0	0	0	0	0	0	0	0	2	0	0	0	0	0	0	0	0	0	0	0	0	0	0	0	0	3	0	0	0	0	0	0	0	0	0	0	0
ENSGALG00000027983	322	327	564	592	428	151	599	453	142	375	301	677	310	724	366	549	484	389	219	288	243	563	484	528	270	314	283	542	599	449	475	593	652	564	619	623	301	373	288	653	482	405	412	473	435
ENSGALG00000007536	65	98	85	150	106	124	79	69	70	80	56	98	54	23	40	94	143	103	32	17	20	136	188	114	39	30	58	62	78	54	39	50	50	91	65	78	26	63	36	42	65	54	33	44	26
ENSGALG00000046559	25	18	26	23	21	40	14	37	22	137	186	239	51	13	4	101	251	212	7	9	34	112	66	147	29	35	19	87	192	168	55	41	138	114	181	176	7	160	18	113	295	106	65	138	34
ENSGALG00000027722	1250	102	96	1976	89	923	1388	974	1432	1100	551	1226	774	1149	706	824	686	45	502	462	601	81	623	936	820	796	770	864	60	1467	1212	1089	1822	896	1038	1138	991	44	566	1374	1063	1092	1149	1374	1243
ENSGALG00000007478	3	3	5	0	6	5	7	5	7	35	27	7	0	0	0	13	2	7	0	6	0	0	16	6	0	0	0	0	28	9	7	0	5	5	0	3	0	4	0	0	0	8	0	3	0
ENSGALG00000050781	3	4	4	0	5	5	0	3	2	3	0	2	0	0	1	5	2	5	1	0	1	4	1	4	2	0	0	1	3	2	1	1	1	2	3	2	1	1	1	2	3	2	0	1	2
ENSGALG00000007337	258	355	98	345	291	416	178	129	129	382	49	132	47	179	74	177	121	184	52	10	48	267	202	193	75	32	95	102	242	216	88	65	24	88	169	104	28	108	93	69	154	162	28	54	33
ENSGALG00000007357	746	761	231	2413	1935	2236	1730	1728	1106	2549	619	2980	570	570	1609	2833	2553	3034	778	548	626	2643	1914	3129	944	308	1111	1959	576	2206	1475	853	503	1962	2033	2623	1321	1776	956	2938	2428	954	1543	1966	1110
ENSGALG00000007361	8	5	0	7	0	0	0	0	0	0	0	0	0	0	0	0	0	0	0	0	0	22	0	0	0	0	0	0	0	0	0	0	0	0	0	0	0	0	0	0	0	0	0	0	0
ENSGALG00000007419	297	70	355	43	10	30	0	2	0	76	36	13	0	6	0	14	26	0	5	0	16	0	52	4	2	18	12	4	83	2	16	6	17	2	14	0	33	20	0	18	4	0	5	6	0
ENSGALG00000049056	5	1	0	0	0	3	3	1	0	0	0	0	0	1	1	0	0	1	1	0	0	1	0	0	5	0	7	0	2	0	1	1	0	2	1	1	2	0	0	0	1	0	1	3	0
ENSGALG00000049055	0	0	0	0	0	0	0	0	0	0	0	0	0	0	0	0	0	0	0	0	0	0	0	0	0	0	0	0	0	0	0	0	0	9	0	0	0	0	0	0	0	0	0	0	0
ENSGALG00000049053	0	0	4	0	0	2	0	0	0	2	0	0	0	0	0	0	0	0	0	0	0	2	0	0	0	0	0	0	0	0	0	0	0	4	7	0	0	0	0	0	0	0	0	0	0
ENSGALG00000049052	0	3	0	0	0	0	0	0	1	0	5	15	0	0	0	0	0	0	0	0	0	0	0	0	0	0	0	0	0	0	0	0	0	0	0	0	0	0	0	0	0	0	0	2	0
ENSGALG00000049051	0	0	4	2	3	2	0	0	0	0	1	0	0	0	0	0	2	0	0	0	0	3	0	2	0	0	0	6	0	0	0	0	0	0	0	0	0	0	1	0	0	0	0	0	0
ENSGALG00000049058	0	0	2	0	0	0	0	2	2	0	0	3	6	6	0	0	0	10	0	2	5	0	0	0	0	2	8	0	3	0	0	0	0	0	3	0	0	0	7	0	0	0	0	3	0
ENSGALG00000030997	2	0	0	0	0	0	0	0	0	0	0	0	0	0	0	0	0	0	0	0	0	0	0	1	0	0	0	0	0	0	0	0	0	0	0	0	0	0	0	0	0	0	0	0	0
ENSGALG00000048902	5	0	15	3	0	0	0	0	0	0	0	0	0	0	0	0	0	0	0	0	0	0	0	0	0	0	0	0	0	0	0	0	0	11	4	0	0	4	3	0	0	0	0	0	0
ENSGALG00000048907	0	0	1	0	0	0	0	0	0	1	0	1	0	0	0	0	1	1	0	1	1	3	1	1	0	0	0	1	0	0	0	0	0	0	0	0	0	1	1	0	1	0	0	0	0
ENSGALG00000048904	2	0	2	0	0	0	0	0	0	0	0	0	0	0	0	0	9	11	0	0	0	6	0	0	0	0	0	14	0	0	0	2	0	0	0	0	0	0	0	0	0	2	0	0	0
ENSGALG00000048908	0	2	0	0	0	0	0	0	0	0	0	0	0	0	0	0	0	0	0	0	0	0	0	0	0	0	0	0	0	0	0	0	0	0	0	0	0	0	0	0	0	0	0	0	0
ENSGALG00000048909	0	2	0	0	0	0	0	0	0	0	0	0	0	0	0	0	0	0	0	0	0	0	0	0	0	0	0	0	0	0	0	0	0	0	0	0	0	0	0	0	0	0	0	0	0
ENSGALG00000033813	2188	3369	4063	2655	3064	3467	2245	1543	1064	254	321	202	273	479	354	391	291	281	357	198	315	430	449	416	285	357	367	288	272	275	248	469	338	304	257	244	260	193	251	325	478	188	249	306	327
ENSGALG00000011705	223	295	158	122	115	150	41	80	59	98	93	138	24	99	64	157	116	82	52	225	68	150	60	97	103	3	94	52	118	55	62	88	16	77	108	53	69	76	85	119	79	89	85	69	93
ENSGALG00000028940	922	1438	1245	1118	1225	1350	1029	1759	1016	1498	1325	1510	496	606	512	1164	969	1158	387	304	368	1403	998	1902	603	218	769	1122	928	1008	195	221	81	862	880	981	181	288	370	1365	884	1083	362	227	284
ENSGALG00000011696	1780	1905	1383	1364	1667	1728	432	538	625	761	119	150	57	233	228	399	253	181	170	93	83	285	359	414	220	23	227	114	192	139	168	132	24	91	86	66	62	34	44	164	54	57	72	46	25
ENSGALG00000028942	364	401	586	479	539	513	303	305	345	229	261	278	220	169	111	234	202	218	84	247	261	269	188	369	139	312	157	173	125	214	227	197	449	84	154	116	229	155	153	150	65	116	354	444	202
ENSGALG00000011718	3031	3374	2893	1836	2273	2667	764	1034	1056	1214	508	1121	185	790	519	1471	651	792	483	302	344	1256	982	1152	463	147	711	1083	1128	765	632	899	224	759	912	826	500	715	562	885	925	763	657	943	475
ENSGALG00000011715	6382	10904	6664	29031	17050	21114	26733	16203	25195	21317	10289	16546	7086	18865	29938	27131	13574	12088	7045	13552	8236	42383	60766	32847	7156	15705	21263	70830	79561	60265	88311	79055	81166	158776	65310	90709	44644	30374	19919	234011	209678	140813	77924	41362	70238
ENSGALG00000040026	32	24	28	48	54	33	246	161	163	46	17	16	24	125	48	7	48	9	13	40	21	16	13	15	69	10	83	18	10	12	42	34	6	6	2	9	24	33	41	4	11	0	24	41	37
ENSGALG00000011797	847	871	1744	411	418	467	426	366	467	479	322	519	203	187	229	370	155	262	32	115	102	261	372	293	129	27	95	275	309	262	104	142	79	210	241	243	93	154	80	245	346	223	173	195	164
ENSGALG00000011721	100	133	92	35	52	91	0	17	5	55	6	8	0	6	8	9	3	0	6	3	0	6	5	5	8	8	11	0	3	2	4	22	17	6	0	10	6	45	16	0	0	3	16	32	22
ENSGALG00000010019	1562	1798	1916	1024	1084	1037	778	845	706	1687	1526	1714	167	789	468	1657	929	1425	502	958	489	1413	1084	1764	642	120	740	1694	1218	1411	492	576	152	1007	1157	1476	457	649	413	1535	1612	1539	594	662	613
ENSGALG00000010031	94	179	287	58	73	42	8	16	19	32	19	37	4	4	4	40	29	19	6	5	4	29	17	48	7	0	16	19	8	7	4	9	0	7	15	6	8	15	8	5	9	4	26	14	3
ENSGALG00000010013	2081	3068	2641	1329	1777	2313	692	673	676	1378	978	2236	167	571	341	1661	1107	1257	338	492	385	1709	1384	2658	845	93	1537	1159	1544	986	389	699	176	772	855	1259	332	341	362	1142	1182	966	584	498	319
ENSGALG00000010022	655	704	361	328	378	222	383	369	331	422	359	84	212	248	456	311	331	377	403	281	281	162	168	425	706	107	404	421	377	458	230	437	91	262	144	442	510	455	356	266	495	303	442	566	451
ENSGALG00000010006	1001	1121	1138	508	514	577	187	267	352	1321	710	1203	86	179	133	1361	902	929	141	112	130	1159	932	1149	196	65	272	1054	1180	1054	174	225	68	1046	1020	1087	135	212	284	1152	1047	1134	273	153	149
ENSGALG00000049439	0	0	0	9	0	2	0	0	0	185	55	2	0	0	0	0	0	0	0	0	0	0	0	0	0	0	0	0	0	0	0	0	0	0	0	0	0	0	0	0	0	3	0	0	0
ENSGALG00000048950	34	28	57	37	48	25	6	14	4	35	23	18	5	0	13	25	16	37	12	17	10	12	7	51	9	0	15	17	9	12	10	9	2	0	8	18	2	2	6	0	12	17	4	9	10
ENSGALG00000009985	99	98	189	30	80	57	24	35	64	125	98	137	24	76	19	53	86	105	16	71	79	83	47	148	19	14	84	16	72	71	27	75	19	75	75	101	28	78	104	69	18	7	102	105	70
ENSGALG00000010035	1441	1545	1401	728	729	790	715	626	489	1655	1161	1431	175	975	457	2288	1365	1415	396	396	401	1983	2145	3024	671	207	1009	1253	1694	1764	636	660	205	1824	1652	1516	518	942	557	1761	1849	1830	657	736	555
ENSGALG00000030689	24	26	14	7	14	5	15	15	2	30	17	20	4	51	13	34	25	12	5	14	21	13	41	28	15	44	59	10	24	22	28	52	31	23	13	17	43	83	65	6	15	12	65	65	53
ENSGALG00000049224	44	28	0	11	23	19	15	8	7	3	31	10	11	17	0	21	16	24	27	37	25	9	8	9	35	10	24	14	0	0	11	13	10	13	17	0	27	13	0	15	20	3	51	62	0
ENSGALG00000050622	20	38	18	12	20	12	7	6	15	21	2	4	8	5	7	3	0	6	0	0	4	7	0	15	0	0	11	13	8	7	18	4	3	0	3	6	0	3	3	12	3	8	10	0	4
ENSGALG00000051236	17	16	12	7	14	2	4	2	3	10	0	11	14	2	5	10	2	7	2	0	0	1	6	0	5	0	2	6	3	0	11	6	0	0	4	0	0	0	0	0	2	0	0	0	0
ENSGALG00000000713	4022	2499	1466	3218	2715	2790	1998	1923	1849	5607	2392	2846	916	1217	858	3956	1866	3432	991	754	1026	4108	2353	4197	1343	647	1537	2841	2434	2570	1530	1248	490	1918	1323	2138	850	1400	1081	1169	2333	2162	1115	1550	811
ENSGALG00000025383	0	0	0	0	0	0	1	0	0	1	0	1	0	0	0	0	0	0	0	0	0	0	0	0	0	0	0	0	1	0	0	0	0	0	0	0	0	1	0	0	0	0	0	0	0
ENSGALG00000000707	2605	3279	4262	3401	3071	3419	2538	3312	2912	2894	2960	4232	4398	4093	2821	5055	3042	3503	3182	9711	3647	4359	2850	3266	5550	1152	5412	3636	4298	3448	2565	3771	1383	5596	4094	7305	5446	4789	6865	7498	7368	7916	7111	7926	7500
ENSGALG00000018261	0	0	0	0	0	0	0	0	0	0	0	0	0	0	0	0	0	0	0	0	0	0	0	0	0	0	0	0	0	0	0	0	0	0	0	0	0	1	0	0	0	0	0	0	0
ENSGALG00000054870	11	14	15	8	7	0	0	5	6	16	0	18	8	0	0	14	19	12	0	0	0	15	0	0	5	0	0	20	17	15	0	4	0	13	13	19	0	0	0	19	28	6	0	0	0
ENSGALG00000047904	0	19	9	10	10	7	2	10	13	30	15	52	10	8	3	23	23	21	3	12	8	36	7	31	6	0	8	19	9	39	2	5	0	18	24	31	2	0	2	18	35	16	13	20	0
ENSGALG00000050520	68	23	28	15	5	20	6	10	8	197	29	22	5	5	2	8	16	5	5	0	6	8	41	6	9	2	4	6	4	10	11	2	2	2	6	8	6	5	2	11	5	8	1	3	1
ENSGALG00000049351	51	13	30	8	7	30	2	11	7	43	4	7	5	4	2	5	9	7	2	0	1	4	22	5	6	2	3	5	4	2	3	3	1	2	2	3	2	7	4	15	5	8	1	5	4
ENSGALG00000050881	9	11	0	4	8	3	6	0	5	29	1	11	0	0	1	6	3	3	0	0	0	5	3	3	0	0	1	5	3	2	3	1	0	0	4	3	0	2	0	0	0	2	0	0	0
ENSGALG00000031355	10	9	25	2	3	0	0	3	0	11	5	7	0	0	0	19	10	16	0	0	1	9	6	24	0	0	0	8	8	0	0	0	0	0	0	1	0	0	2	2	0	0	0	4	0
ENSGALG00000051197	2	8	3	0	0	2	0	2	0	21	8	11	3	1	0	53	73	1	0	0	0	1	2	26	2	1	0	0	0	11	1	0	0	0	2	20	0	0	1	0	0	19	0	0	0
ENSGALG00000050905	0	0	0	2	0	0	0	0	0	4	0	0	0	0	0	0	4	0	0	0	0	0	0	0	115	0	0	0	0	0	0	0	0	0	0	0	0	0	0	0	0	0	0	0	0
ENSGALG00000054901	118	95	105	71	97	82	43	59	37	93	44	44	41	23	34	48	21	49	13	22	14	35	28	48	16	12	30	10	23	30	9	16	8	0	22	15	15	14	8	19	11	15	20	6	0
ENSGALG00000041303	0	0	0	0	0	0	0	0	0	0	0	0	0	0	0	0	0	0	0	0	0	0	0	0	0	0	0	0	3	0	0	0	0	5	0	0	0	0	0	0	0	0	0	0	0
ENSGALG00000054307	0	8	10	0	0	7	0	0	0	0	5	0	0	0	0	0	0	0	0	0	0	0	18	0	0	0	0	0	0	0	0	0	3	0	0	0	0	3	0	0	0	0	0	0	0
ENSGALG00000025204	4	2	3	1	5	3	0	1	3	4	0	1	0	1	1	1	3	2	1	0	0	1	0	0	0	0	2	1	2	0	0	0	1	2	4	0	1	1	0	1	5	0	4	3	0
ENSGALG00000054300	0	2	0	0	0	0	0	0	0	5	0	0	0	0	0	0	0	0	0	0	0	0	0	0	0	0	0	0	0	0	0	0	0	1	2	0	0	1	0	0	0	0	0	0	0
ENSGALG00000035057	686	786	1094	475	525	430	332	310	368	718	586	754	345	395	298	528	330	486	365	357	384	621	606	449	419	234	312	523	509	503	385	308	486	472	548	790	595	342	409	771	471	573	360	408	484
ENSGALG00000046820	2	2	6	4	0	5	0	0	0	4	3	0	0	0	0	6	3	0	0	0	0	0	0	0	0	0	0	0	0	0	2	0	0	0	0	0	0	0	0	0	0	0	0	0	0
ENSGALG00000029035	0	0	0	0	2	0	0	0	0	10	21	8	4	0	0	7	20	17	0	0	4	0	0	0	0	4	0	0	15	7	3	3	3	7	0	0	7	0	0	8	0	7	0	0	0
ENSGALG00000002383	0	0	0	0	0	4	0	0	0	24	40	30	6	4	0	27	73	36	0	0	7	7	14	4	6	0	4	0	10	4	2	0	7	7	7	0	4	7	0	5	6	9	0	11	8
ENSGALG00000002371	1714	1603	1019	3302	1833	2766	3050	2430	2036	1357	546	1196	969	3269	2024	732	879	1345	1011	431	1070	1743	1180	1374	1321	1622	1435	1369	1500	1137	1225	1595	2414	1077	1129	1748	1768	2214	1087	1818	1226	1210	2207	3248	1115
ENSGALG00000002326	225	190	118	121	148	181	106	58	81	263	146	449	78	88	58	264	257	221	52	4	31	182	179	197	57	39	86	162	238	205	97	102	59	36	166	109	40	47	29	77	44	90	44	36	34
ENSGALG00000002069	107	174	165	105	137	126	100	97	91	239	156	211	111	62	45	218	199	206	47	43	55	213	144	190	70	78	85	161	207	145	128	93	173	125	121	149	85	68	72	161	110	178	122	112	69
ENSGALG00000002064	498	631	914	471	364	482	539	518	540	340	330	591	530	298	222	414	317	374	230	593	319	368	354	374	338	331	387	242	301	214	358	386	506	241	249	411	399	302	420	315	452	256	368	305	316
ENSGALG00000027658	407	373	567	117	1099	1203	754	32	639	110	153	114	833	423	334	244	262	137	384	471	36	309	252	360	426	646	370	211	120	262	462	483	1128	239	329	361	554	516	41	332	351	262	740	975	919
ENSGALG00000027747	0	14	26	4	12	29	12	12	26	195	133	299	99	16	14	253	229	241	28	34	46	211	145	241	36	94	57	171	218	133	71	53	103	145	224	275	30	108	22	176	157	188	32	109	38
ENSGALG00000021355	32	20	62	18	26	51	8	16	18	137	118	148	64	0	10	178	312	342	11	33	32	207	154	196	28	40	45	138	120	124	35	35	40	89	121	158	20	74	28	162	121	167	42	60	56
ENSGALG00000028411	7	8	8	2	8	3	5	0	6	28	10	34	7	9	0	37	84	50	3	0	10	61	38	34	6	6	4	28	62	19	14	3	6	25	44	23	2	26	8	30	8	12	2	3	0
ENSGALG00000022920	1151	1251	1691	824	966	1030	484	706	570	502	496	798	412	324	234	750	609	600	212	211	189	719	520	694	247	243	339	378	551	318	246	200	502	360	421	481	160	235	186	399	401	453	239	333	336
ENSGALG00000047393	403	455	229	291	324	431	223	254	217	286	168	205	324	369	98	308	361	213	111	33	227	339	285	309	178	273	206	250	294	421	246	188	266	147	378	183	86	248	135	164	139	172	95	173	75
ENSGALG00000016094	119	117	119	23	20	36	13	28	45	54	42	83	28	17	10	50	28	32	14	27	24	22	62	41	34	51	22	68	15	30	27	29	33	19	27	24	44	13	20	20	24	21	24	53	12
ENSGALG00000030516	0	0	0	0	0	0	0	0	0	0	0	0	2	0	0	0	0	0	0	0	0	0	0	0	0	0	0	1	0	0	0	0	0	0	0	0	0	0	0	0	0	0	0	0	0
ENSGALG00000044620	1486	857	1407	778	1052	1282	548	414	635	2238	339	708	113	496	320	757	476	427	232	113	187	668	373	576	437	50	397	333	431	411	277	259	72	211	359	274	203	320	208	276	274	270	190	180	132
ENSGALG00000016086	2	0	0	0	0	4	0	3	4	11	0	4	3	0	0	8	2	4	0	0	0	106	67	15	0	13	7	23	137	60	72	21	20	107	46	110	0	5	3	98	155	51	2	22	0
ENSGALG00000016088	3354	4553	5440	2930	2530	2929	1731	2217	2356	2946	2010	3757	2585	1722	1901	2101	1224	2387	1256	2035	1134	2181	1746	1902	1662	1241	1269	1814	2419	2215	1601	1502	2987	1880	1644	2794	1420	1116	1146	2331	2204	1883	2711	1742	2275
ENSGALG00000016089	350	316	472	320	273	326	242	274	263	433	402	515	340	214	161	688	480	418	294	383	269	477	316	373	223	337	277	509	502	427	417	380	621	325	239	405	294	390	548	483	377	367	397	648	388
ENSGALG00000032329	203	287	642	105	85	121	82	69	163	140	171	283	437	192	308	50	53	73	14	106	44	36	25	42	89	54	42	94	130	89	139	141	272	35	112	236	119	139	93	165	95	71	118	120	181
ENSGALG00000000067	490	648	1109	275	334	415	181	255	347	460	595	659	225	234	180	396	354	426	74	112	154	552	681	524	98	211	196	446	679	577	237	260	596	484	456	760	115	182	174	561	619	394	181	226	146
ENSGALG00000016098	94	99	57	22	34	82	22	20	33	68	20	45	16	14	14	57	14	57	12	4	9	55	40	72	18	5	21	31	69	62	14	8	10	26	38	32	9	6	5	55	35	29	4	17	4
ENSGALG00000039105	0	0	4	0	0	0	0	0	0	0	0	0	0	0	0	0	0	2	0	0	0	0	0	0	0	0	0	0	0	0	0	0	0	0	0	0	0	0	0	0	0	0	0	0	0
ENSGALG00000004598	150	85	187	14	20	28	4	10	15	16	0	0	0	0	0	3	0	0	0	0	0	0	15	0	4	0	0	0	4	0	0	4	0	0	0	0	0	0	3	3	0	0	0	0	0
ENSGALG00000041153	117	120	193	42	30	83	51	39	37	76	32	61	32	12	5	38	34	37	2	6	0	36	41	63	8	13	13	30	37	16	13	16	28	35	27	34	0	15	0	42	46	23	17	8	3
ENSGALG00000004610	165	193	122	153	134	163	109	97	82	164	89	153	56	45	24	112	188	164	41	0	38	194	282	280	45	32	46	177	189	284	68	85	101	167	268	367	55	104	286	130	134	173	98	113	44
ENSGALG00000004625	1216	1321	1204	675	560	898	498	431	641	746	452	723	437	545	410	782	586	469	299	341	340	652	525	500	490	91	380	451	617	427	459	376	128	314	472	440	201	334	274	432	465	408	303	306	314
ENSGALG00000041861	9	14	6	2	10	6	0	3	0	9	0	0	0	0	0	10	2	0	4	0	0	12	0	0	4	0	0	0	6	18	0	0	0	0	0	0	0	0	0	0	0	0	0	0	0
ENSGALG00000004562	2278	2631	2416	1657	2275	2550	800	1024	834	1964	1776	1829	374	891	306	2060	1719	2081	422	576	484	2056	1938	3503	738	216	1145	2082	2383	2309	733	959	201	1830	2684	1645	492	826	840	2650	2590	2376	936	1226	447
ENSGALG00000004571	4327	5884	812	3171	3128	3394	2634	2409	2689	6543	7899	9231	1553	2231	298	9137	6584	13014	1062	3052	1578	6783	5416	9536	23	1132	2105	13305	8238	16391	1420	1801	727	10330	10807	11623	1819	2270	1519	17342	14710	17296	2355	3488	2340
ENSGALG00000054931	287	484	992	706	779	777	439	481	349	418	1091	651	566	166	123	639	840	445	247	443	393	627	509	864	239	387	289	620	231	559	311	307	1009	466	464	824	304	297	327	676	483	368	274	379	218
ENSGALG00000043606	123	94	144	73	111	63	52	39	53	131	168	237	41	9	23	303	323	353	49	64	45	354	350	428	68	43	62	204	166	245	101	66	96	166	159	132	41	85	53	181	88	172	66	64	42
ENSGALG00000041923	1051	1248	1438	301	508	501	198	549	793	645	292	415	180	110	132	51	135	71	17	3	33	106	74	101	46	78	62	46	41	77	41	26	51	12	55	55	7	48	49	7	27	24	33	16	0
ENSGALG00000035850	76	71	144	69	56	113	50	81	65	56	156	156	46	25	10	74	69	108	14	14	28	61	62	130	25	11	18	58	37	116	9	9	27	57	87	124	2	16	23	51	68	69	12	20	29
ENSGALG00000047035	1	0	1	0	0	0	0	0	0	0	0	0	0	0	0	0	0	0	0	0	0	0	0	0	0	0	0	0	0	0	0	0	0	0	0	0	0	0	0	0	0	0	0	0	0
ENSGALG00000050875	0	0	0	0	0	0	0	0	0	0	0	0	0	0	0	0	9	0	0	0	0	7	0	26	0	0	0	5	0	9	0	0	0	2	7	0	5	3	0	0	14	7	0	9	0
ENSGALG00000031240	58	37	35	18	31	40	58	63	42	64	23	53	54	39	15	79	28	28	14	17	27	40	17	19	44	38	29	22	25	43	38	39	49	9	32	13	29	32	38	22	13	30	19	37	40
ENSGALG00000033927	182	259	1247	1007	1076	1089	1259	1040	961	204	1706	479	1878	296	188	132	1385	219	334	440	1955	1319	1332	1574	262	288	137	1432	103	1355	260	349	3927	876	866	1407	2213	1821	2500	975	872	795	1417	2245	1442
ENSGALG00000033404	135	182	244	139	146	222	131	70	123	358	185	435	193	38	79	379	311	239	45	60	65	365	424	291	32	28	43	301	285	259	74	110	206	250	281	297	21	58	67	368	254	98	49	64	100
ENSGALG00000015068	0	0	0	0	0	0	0	0	0	0	0	0	0	0	0	0	0	0	0	0	0	0	0	0	0	0	0	0	2	0	0	0	0	0	0	0	0	0	0	0	0	0	0	0	0
ENSGALG00000015062	2	0	0	0	0	0	0	0	0	3	0	0	0	0	0	0	10	0	0	0	4	0	0	12	0	0	0	0	0	0	0	0	0	0	0	0	0	0	0	0	4	2	0	0	3
ENSGALG00000014337	125	85	35	67	42	37	15	2	18	88	36	40	0	65	21	10	8	2	0	2	0	17	7	54	6	5	27	15	7	34	11	8	8	5	41	0	0	0	15	13	12	6	5	0	6
ENSGALG00000001132	2	0	3	0	1	0	0	0	0	0	0	2	1	0	0	2	0	0	0	0	0	4	0	0	0	0	0	0	0	0	0	0	0	0	0	3	0	0	0	0	0	0	0	0	0
ENSGALG00000052936	35	19	25	36	50	15	6	13	3	12	0	5	5	3	3	16	5	8	5	0	0	10	21	84	0	6	12	7	35	29	0	20	36	4	5	8	0	5	5	15	0	4	2	3	0
ENSGALG00000025279	0	0	2	0	0	0	0	0	0	0	0	0	0	0	0	0	0	1	0	0	0	0	0	0	0	0	0	0	0	0	0	0	0	0	0	0	0	0	0	0	0	0	0	0	0
ENSGALG00000010664	93	112	36	50	49	89	30	29	26	495	48	66	0	16	16	34	19	26	2	0	2	64	58	45	0	2	2	30	74	20	8	2	2	16	50	34	0	8	7	44	32	9	0	4	0
ENSGALG00000010653	89	89	20	54	71	66	19	37	59	86	62	67	36	49	35	58	55	32	46	66	41	41	6	55	72	12	37	48	8	45	7	29	4	42	35	39	23	5	33	69	45	84	24	57	25
ENSGALG00000010641	1600	1757	2135	1084	1326	1474	656	654	810	3050	2887	3912	222	687	486	4339	2974	3564	392	1042	422	3366	3438	4422	594	177	895	3660	3609	3723	493	598	165	2653	3933	3711	419	452	384	5112	4929	4134	652	582	404
ENSGALG00000010635	5	5	3	5	2	3	0	0	2	11	0	0	0	0	0	4	4	2	4	3	0	0	8	0	0	0	2	8	1	4	0	2	0	0	0	0	0	0	0	0	4	6	0	1	0
ENSGALG00000041906	0	0	0	0	0	0	20	0	0	46	0	97	0	0	0	138	32	66	7	0	6	74	69	73	0	0	0	47	47	29	7	0	0	13	17	62	0	0	2	99	23	88	9	0	2
ENSGALG00000052040	5	2	0	3	0	0	0	0	0	2	6	3	0	0	4	18	5	7	6	3	0	15	8	13	0	0	0	8	0	14	0	0	0	2	10	15	0	0	0	0	0	5	0	0	2
ENSGALG00000010671	5388	5670	6788	2736	4172	3785	1101	2769	2500	3721	1997	2866	645	852	1199	3408	2492	2479	1120	463	893	2939	2190	2848	1362	341	1236	2162	1797	2107	718	779	493	1572	1899	1666	888	999	916	2573	1501	1783	836	1381	1151
ENSGALG00000028017	5	17	11	7	0	12	0	5	0	38	31	12	0	4	0	24	8	39	0	0	11	21	15	21	6	0	0	35	9	16	0	0	3	25	27	28	0	1	5	43	58	21	3	1	2
ENSGALG00000028762	219	192	193	93	179	178	76	110	101	376	173	276	29	88	68	823	303	234	53	17	51	565	303	555	90	14	78	213	154	99	19	68	6	80	198	208	35	57	57	65	80	186	24	32	7
ENSGALG00000009552	29	76	35	4	20	18	15	5	9	124	109	130	29	14	7	77	28	22	7	14	14	16	38	101	24	23	43	3	36	24	8	33	35	26	31	76	20	24	52	38	37	27	17	34	40
ENSGALG00000009562	0	8	19	2	0	0	0	0	5	405	120	61	0	0	0	31	17	13	0	0	2	8	0	5	6	0	0	0	0	0	0	0	0	0	3	0	0	5	0	0	0	3	0	6	0
ENSGALG00000053905	0	0	0	0	0	7	2	0	0	4	0	0	0	0	0	6	0	0	0	0	0	0	0	0	0	0	0	0	0	0	0	0	0	0	0	0	0	0	0	0	0	0	0	0	0
ENSGALG00000009510	64	84	108	85	103	119	43	40	32	28	85	28	39	7	4	63	112	22	6	0	17	54	87	112	13	0	14	20	21	30	0	2	8	41	42	0	28	14	16	41	39	12	7	8	2
ENSGALG00000009519	168	253	330	31	32	27	17	11	26	44	50	33	12	9	13	24	10	26	6	2	9	15	2	9	26	3	12	9	14	14	4	8	0	6	15	28	9	8	5	13	8	17	18	10	0
ENSGALG00000009526	290	364	604	210	299	338	188	124	129	513	358	368	154	222	164	373	291	337	237	466	318	306	171	330	440	84	417	308	281	175	179	323	106	197	194	295	293	222	240	210	245	209	237	388	161
ENSGALG00000009538	293	368	444	90	117	135	61	65	62	345	254	314	44	47	38	286	211	194	58	54	72	217	123	294	50	32	78	150	205	197	28	81	17	112	189	233	43	77	79	202	139	229	41	60	72
ENSGALG00000008417	0	0	0	0	2	0	0	0	0	32	0	0	0	0	0	4	3	3	0	0	0	0	0	0	0	0	0	0	0	2	0	0	0	5	0	0	0	0	0	0	0	2	2	0	0
ENSGALG00000009565	474	2473	680	227	1300	1526	241	137	270	346	185	300	78	212	903	141	112	201	73	88	130	281	185	243	174	155	183	140	285	164	59	202	213	107	132	216	126	186	173	219	213	188	230	241	188
ENSGALG00000009570	1483	1893	2247	1842	1746	1987	2124	2386	1889	2199	2030	3347	1550	1801	1176	2525	1499	2588	643	2026	1008	2322	1847	2729	1322	655	1235	2226	3055	2799	905	1462	780	2130	2261	3689	1565	1283	1510	3000	3046	2959	2377	1459	1823
ENSGALG00000042645	1935	3024	2787	2271	2936	3108	1212	1696	1189	3514	1818	2926	1135	825	512	2713	1892	1424	991	571	606	2481	2054	1962	651	297	1069	2485	2025	2014	694	888	291	1116	1849	1595	452	775	598	1949	2235	1657	583	1100	561
ENSGALG00000048937	13	6	39	4	5	0	0	5	0	4	74	23	0	0	2	22	9	12	4	4	9	15	48	80	6	0	8	39	22	10	4	2	0	39	28	11	0	4	4	23	76	3	16	5	0
ENSGALG00000029701	589	571	396	336	414	497	314	227	250	663	239	374	62	266	185	418	307	329	119	46	101	422	318	436	206	49	187	207	294	244	167	122	31	132	171	122	90	140	104	114	162	165	59	124	45
ENSGALG00000008621	2628	4116	2104	18251	15369	16351	9958	6955	7320	963	387	804	928	1306	536	695	734	486	384	41	259	796	511	963	621	156	439	462	504	488	282	371	375	347	469	460	139	281	214	290	364	291	191	264	301
ENSGALG00000037985	1	3	3	0	4	4	1	0	3	5	7	3	1	3	4	4	6	7	0	3	0	3	0	5	0	0	0	1	4	3	3	0	1	1	3	1	3	1	0	0	0	4	0	3	4
ENSGALG00000008606	1086	1333	1655	1095	2101	843	3658	1828	2148	454	94	1122	1536	2006	1213	895	148	1000	977	1887	943	163	427	128	1134	580	975	86	22	716	1082	924	48	551	495	685	1020	1196	775	598	707	549	892	1147	1028
ENSGALG00000011418	3	0	0	0	0	0	0	0	0	23	0	23	0	0	0	15	19	26	4	3	7	13	10	14	7	0	4	7	11	0	3	0	0	10	7	8	4	11	12	0	9	0	21	14	18
ENSGALG00000025418	24	24	20	2	12	7	9	10	8	27	20	26	5	3	7	18	24	14	5	3	5	12	19	18	4	0	4	10	13	8	2	9	3	4	8	8	4	2	4	5	4	14	4	12	2
ENSGALG00000008582	1697	1738	1634	891	1262	1611	603	688	572	1500	758	1272	142	814	493	1347	1006	799	317	433	321	969	659	1129	586	80	486	611	617	535	384	391	87	367	593	371	219	358	298	293	443	541	228	354	193
ENSGALG00000011341	0	0	0	0	0	0	0	0	0	91	43	11	0	0	0	0	0	0	0	0	0	5	0	0	0	0	0	0	0	3	0	0	0	0	0	0	0	0	0	0	0	0	0	0	0
ENSGALG00000054395	0	0	0	0	2	7	0	2	0	0	0	0	2	0	0	0	0	0	0	0	0	0	0	0	0	0	0	0	0	0	0	0	0	0	0	0	0	0	0	0	0	0	0	0	0
ENSGALG00000054390	3	0	2	0	0	0	0	0	0	0	0	0	0	0	0	0	2	0	0	0	0	0	0	0	0	0	0	0	0	0	0	0	0	0	0	0	0	0	0	9	0	0	0	0	0
ENSGALG00000049529	2064	2035	2608	923	2887	1998	626	1182	794	726	1286	1088	874	1010	480	1598	803	902	742	1680	728	1032	416	1460	799	520	1972	464	163	329	1254	1503	498	85	267	126	467	710	588	217	247	105	1061	752	237
ENSGALG00000015307	116	13	38	8	14	12	0	4	0	2	23	16	15	5	5	3	17	14	9	30	10	13	0	0	5	0	33	6	0	0	6	4	5	0	0	0	12	7	0	0	0	0	10	0	0
ENSGALG00000015293	85	38	13	108	92	215	16	4	31	58	12	45	7	28	21	34	28	30	4	0	5	62	55	10	7	4	7	11	71	61	3	6	4	25	51	55	0	3	0	56	11	21	0	0	14
ENSGALG00000015299	1576	1853	4042	1663	2330	2603	1181	1875	1343	1068	1580	1190	1223	533	273	817	1397	834	318	527	647	1692	1549	1931	422	170	513	1627	802	1705	166	356	510	1303	1333	2128	430	708	829	1625	1541	1521	651	775	671
ENSGALG00000015285	591	621	391	1104	936	1398	322	317	373	171	57	131	60	280	144	157	95	114	77	77	86	142	114	88	119	23	106	84	118	72	91	98	26	69	146	87	122	124	80	93	73	87	99	82	87
ENSGALG00000015287	22	21	42	166	113	216	9	3	40	11	12	5	2	7	2	9	3	30	0	2	5	3	5	5	0	0	3	36	34	17	3	8	0	23	12	20	0	5	8	18	9	12	3	6	25
ENSGALG00000015273	1107	1213	1538	928	1145	1113	516	652	533	1249	1175	1103	179	714	392	1145	808	903	230	428	349	1089	835	1210	515	88	381	681	836	754	302	329	72	595	751	669	307	437	272	794	892	877	440	294	378
ENSGALG00000015275	246	288	369	510	178	625	447	35	409	70	199	239	89	197	171	165	207	43	42	173	74	197	26	59	122	48	115	168	215	191	53	131	38	140	140	140	108	145	194	236	225	187	154	187	140
ENSGALG00000015263	50	55	76	69	25	51	24	28	92	51	60	32	20	31	8	36	44	39	41	15	71	49	61	43	83	2	43	53	30	37	21	23	13	64	36	109	18	22	14	79	88	25	19	60	18
ENSGALG00000053198	188	225	141	961	836	437	809	446	304	2009	1	9	62	316	99	73	35	68	91	140	125	4726	3136	85	224	29	137	1	2943	2973	123	71	15	4692	3270	3111	71	71	88	2388	2219	1933	65	98	27
ENSGALG00000047231	13	25	34	15	34	20	9	6	2	5	26	5	9	9	1	5	10	13	1	0	5	28	47	53	3	3	3	19	21	16	0	6	13	4	23	12	2	0	5	4	10	7	3	1	2
ENSGALG00000016470	22	42	19	21	11	18	4	2	0	4	0	10	1	2	2	3	4	0	0	0	0	6	0	7	2	0	2	1	2	0	4	8	4	0	0	0	0	0	0	0	0	0	2	0	0
ENSGALG00000016468	1202	1432	1155	283	523	618	205	316	260	473	288	315	38	113	102	359	174	274	83	44	50	291	228	411	138	14	157	165	144	176	59	72	10	113	173	144	53	86	75	207	197	206	92	64	87
ENSGALG00000033579	0	0	2	0	0	0	0	0	0	0	0	0	0	0	0	1	0	0	0	0	0	0	0	0	0	0	0	0	0	0	0	0	0	0	0	0	0	0	0	0	0	0	0	0	0
ENSGALG00000016461	497	409	723	268	284	316	162	181	164	438	309	461	74	272	228	365	194	238	189	382	209	266	161	252	502	60	267	161	277	237	170	369	83	297	185	293	434	384	395	377	472	365	485	362	489
ENSGALG00000042614	455	563	400	307	412	375	223	172	254	542	228	378	40	305	157	597	258	384	80	92	60	411	336	410	144	2	115	371	393	387	105	135	24	314	413	211	82	133	51	406	365	334	128	128	93
ENSGALG00000016459	209	225	372	30	26	84	22	30	22	398	49	58	22	8	15	25	16	15	5	9	4	17	109	33	24	17	9	30	47	7	7	29	15	18	12	16	2	9	20	10	6	0	0	0	2
ENSGALG00000016467	349	392	471	108	122	158	67	165	113	270	340	267	32	124	62	254	154	211	51	119	42	174	176	242	81	0	81	92	93	91	33	27	15	101	102	106	39	53	37	120	160	139	68	70	67
ENSGALG00000016464	157	101	134	132	140	163	20	24	31	40	88	790	8	16	15	72	39	118	0	2	17	63	50	6	17	0	14	14	83	79	10	8	2	74	204	191	0	8	19	25	81	141	5	5	0
ENSGALG00000016463	1972	2043	139	757	1075	1207	226	346	468	92	1397	1533	131	369	193	2290	1517	1005	198	257	273	2012	1386	114	354	54	424	1402	1234	826	168	314	77	912	1154	1103	150	303	335	938	1176	1156	281	453	332
ENSGALG00000016462	141	43	406	150	363	427	197	575	256	58	36	37	157	88	113	39	11	33	55	18	87	69	73	235	82	16	88	51	33	42	20	64	15	28	18	13	9	17	44	43	26	5	40	14	40
ENSGALG00000011162	504	439	788	334	431	497	274	266	222	717	786	1151	242	269	246	1240	600	1082	204	372	238	943	823	1142	308	226	311	788	745	928	217	199	95	559	704	748	203	208	181	727	618	763	203	266	217
ENSGALG00000039735	37	39	42	105	123	108	210	106	141	66	30	86	24	324	113	44	34	52	34	27	62	65	48	103	106	17	78	6	62	82	37	21	11	10	0	34	27	48	31	7	24	43	24	53	23
ENSGALG00000011139	84	115	52	123	93	145	34	28	24	449	181	155	26	20	0	268	177	163	11	7	8	283	374	245	30	8	41	118	100	257	24	23	13	149	163	122	22	15	33	29	105	108	17	15	24
ENSGALG00000036286	171	262	207	173	254	255	156	121	93	234	175	265	106	55	36	558	260	216	55	21	43	650	555	651	76	39	78	274	328	357	55	67	29	205	436	602	40	62	69	330	407	293	61	89	19
ENSGALG00000034802	1710	1364	1503	2551	2269	3084	1198	913	780	405	242	512	204	1488	1293	615	260	327	362	257	593	525	430	559	429	75	613	413	454	373	553	720	161	230	550	415	491	546	374	430	493	425	1046	671	736
ENSGALG00000011138	1154	1265	1428	512	529	721	465	409	426	880	629	799	293	357	340	804	451	526	149	263	180	661	517	682	248	85	229	691	643	441	257	341	132	541	562	649	204	229	216	731	642	608	362	319	291
ENSGALG00000053258	0	0	0	0	0	0	0	0	0	0	0	0	0	0	0	0	0	0	0	0	0	0	0	0	0	0	0	0	0	0	0	0	0	0	2	0	0	0	0	0	0	0	0	0	0
ENSGALG00000053434	35	54	35	6	26	75	7	3	23	1491	73	1070	4	20	43	88	195	153	3	2	16	148	258	36	8	6	2	454	36	166	3	0	1	16	67	61	2	2	1	166	72	118	4	2	7
ENSGALG00000031862	212	79	244	2	3	5	0	2	0	93	46	31	0	0	0	129	146	162	20	19	23	183	225	287	50	23	133	123	244	105	28	52	19	124	285	185	34	103	82	145	176	114	53	99	52
ENSGALG00000016929	114	72	110	112	384	162	28	140	68	35	9	28	2	0	7	35	21	14	6	0	21	10	7	10	13	0	12	22	0	20	9	3	3	8	20	9	6	16	6	8	3	14	35	4	21
ENSGALG00000016930	304	156	262	137	140	277	80	38	88	140	57	120	19	62	25	165	87	60	37	23	29	117	55	115	46	0	9	80	46	65	20	22	7	41	86	72	13	61	30	29	75	59	8	30	19
ENSGALG00000012068	46	34	86	9	0	12	6	4	10	14	8	18	0	0	13	0	0	8	0	0	3	0	0	3	5	4	4	0	0	0	0	0	0	0	0	0	0	0	0	0	0	8	0	0	0
ENSGALG00000050394	19	12	20	0	0	0	0	0	2	0	0	4	0	0	0	0	0	1	0	0	0	0	0	0	0	0	0	0	4	0	2	0	0	0	0	0	0	0	0	0	0	0	0	0	0
ENSGALG00000016921	38	40	66	30	34	31	0	14	22	63	29	27	0	0	15	16	1	17	0	8	8	18	14	14	17	0	31	16	29	26	0	23	0	20	38	37	24	26	18	22	18	21	0	23	22
ENSGALG00000016922	100	167	78	26	26	72	10	29	28	132	54	58	0	25	21	66	44	45	20	0	12	44	66	64	22	4	27	40	33	38	15	23	0	7	29	23	17	20	20	11	26	26	24	27	0
ENSGALG00000052375	439	284	201	30	107	113	27	27	68	115	20	69	5	20	28	19	16	15	24	6	9	12	16	30	15	7	32	8	11	0	36	13	2	17	5	0	13	19	11	7	0	6	20	12	24
ENSGALG00000021736	1	0	0	0	0	0	0	0	0	0	0	1	0	0	0	2	0	1	0	0	0	0	1	0	0	0	0	0	0	0	0	0	0	1	0	0	0	0	0	0	0	0	0	0	1
ENSGALG00000021771	0	0	0	0	0	0	0	1	0	0	0	1	0	0	0	1	1	1	1	0	0	0	0	0	1	0	0	0	0	0	0	0	0	0	0	0	0	0	0	0	1	0	0	0	0
ENSGALG00000012048	691	461	795	421	473	527	170	321	231	380	455	473	152	347	141	581	430	114	150	220	229	344	290	405	277	52	251	310	287	258	158	171	56	397	317	350	137	49	182	247	495	524	276	240	221
ENSGALG00000016925	376	694	222	1203	1189	1683	930	1093	639	1862	699	1606	272	1440	413	1679	1324	1315	209	142	276	1440	1187	1226	596	157	360	3362	1471	2010	394	242	134	936	796	1027	421	673	495	1573	1065	871	251	594	488
ENSGALG00000021773	0	0	0	1	0	0	0	0	1	0	0	0	0	0	0	1	1	1	0	0	0	1	0	0	0	0	2	0	1	1	0	0	1	0	0	0	0	0	0	0	0	1	0	0	0
ENSGALG00000054533	0	0	0	0	0	0	0	0	0	0	0	0	0	0	0	0	0	0	0	0	0	0	0	0	0	0	0	0	0	0	0	0	0	1	0	0	0	0	0	0	0	0	0	0	1
ENSGALG00000054537	0	0	0	0	0	0	0	3	0	0	0	0	0	0	0	0	0	0	0	0	0	2	0	0	0	0	0	0	0	0	0	0	0	0	0	0	0	0	0	0	0	0	0	0	0
ENSGALG00000054534	0	0	1	0	0	1	0	0	0	2	1	0	0	0	0	0	1	1	0	0	0	1	0	3	0	0	0	0	0	0	0	0	0	1	1	0	1	0	0	0	0	1	0	0	1
ENSGALG00000054535	0	0	0	0	0	0	0	0	0	2	0	0	0	0	0	0	0	0	0	0	0	0	0	0	0	0	0	0	0	0	0	0	0	0	0	0	0	0	0	0	0	0	0	0	0
ENSGALG00000054538	34	2	28	21	9	20	15	3	0	13	4	0	0	0	2	10	4	8	0	0	0	8	0	4	0	0	0	0	3	0	0	0	0	4	0	0	3	0	2	14	3	4	3	0	0
ENSGALG00000029867	213	348	369	211	335	154	14	107	92	134	68	56	23	32	0	114	80	105	14	10	13	55	96	180	0	26	14	61	74	55	14	13	62	48	103	59	17	20	0	68	72	83	19	69	2
ENSGALG00000048524	195	275	228	427	342	428	636	546	545	164	104	116	413	328	226	114	101	129	410	343	411	128	122	103	445	571	489	110	59	70	611	344	792	34	60	85	494	354	489	56	36	80	359	560	455
ENSGALG00000051765	1443	1255	3163	6613	6299	7382	11525	9254	7816	2745	4451	2795	4667	3416	2892	1861	4009	2316	1543	1805	2850	5301	4561	5510	2907	944	1211	3582	1070	4025	1259	899	3496	2298	2978	3315	880	1302	1380	4218	2811	2699	1206	1637	917
ENSGALG00000043785	0	0	4	0	0	0	0	0	0	6	0	3	0	0	0	7	0	7	0	0	0	4	0	0	0	0	0	0	2	0	2	0	0	9	4	0	0	0	2	0	0	0	0	0	0
ENSGALG00000047359	1356	1972	1886	5273	4869	4415	9359	11252	5890	1633	2043	1954	9315	7077	2633	1982	2635	2147	4017	2709	6323	3437	3274	3394	4553	6725	3562	2595	2342	2950	4035	3544	9934	1834	2857	2317	4450	4578	6147	3077	2825	2439	4284	8243	4882
ENSGALG00000052538	0	3	183	148	172	109	117	76	76	0	117	0	83	0	0	0	58	0	0	0	27	110	72	166	0	0	0	148	0	82	0	0	92	83	72	143	63	51	40	85	103	42	33	66	53
ENSGALG00000048807	99	90	90	35	59	77	7	14	0	131	109	155	0	22	18	102	82	231	13	5	11	91	113	72	10	7	27	173	104	231	8	19	3	77	158	97	2	9	25	182	162	181	5	6	6
ENSGALG00000033630	2008	3058	2134	1358	1502	1941	1088	1114	918	2361	1141	1673	269	1792	1161	2668	1344	1315	736	281	479	2143	2269	2436	985	174	980	1859	1907	2094	1104	1040	246	1755	2948	2157	709	1049	532	2849	1975	2427	636	901	721
ENSGALG00000040079	426	359	177	229	265	363	62	38	27	910	280	635	0	20	13	289	324	197	17	1	5	473	241	453	41	6	14	254	302	291	17	24	10	242	334	309	9	0	32	197	207	198	9	9	8
ENSGALG00000047710	21	23	26	14	0	8	0	0	3	71	45	29	0	0	0	40	21	26	6	6	3	30	18	21	0	0	4	19	23	39	0	0	4	15	11	6	2	3	4	10	17	17	12	0	0
ENSGALG00000053623	2	5	7	0	3	6	0	0	0	0	0	0	0	2	0	0	6	0	0	0	0	0	0	1	0	0	0	0	0	0	0	0	0	0	0	0	0	0	0	0	0	4	0	0	0
ENSGALG00000053622	8	3	14	3	2	6	0	4	9	5	10	4	3	6	1	6	9	6	4	0	0	0	6	9	2	0	3	3	3	0	4	4	10	9	0	29	0	3	7	3	3	4	0	0	4
ENSGALG00000053620	0	0	0	0	0	0	0	0	0	0	0	0	0	0	0	0	0	1	0	0	0	0	0	0	0	0	0	0	0	0	0	0	0	0	2	0	0	3	0	0	0	0	3	0	0
ENSGALG00000053629	0	0	0	0	0	0	0	0	0	0	0	0	0	0	0	0	0	0	0	0	0	0	0	0	0	0	2	0	0	0	0	0	0	0	0	0	0	0	0	0	0	0	0	0	0
ENSGALG00000053628	0	0	0	0	0	0	0	0	0	0	0	0	0	0	0	0	0	5	0	0	2	0	2	0	0	0	0	7	0	0	0	0	0	0	7	4	0	2	0	0	12	0	0	5	0
ENSGALG00000007111	732	881	983	601	608	684	413	306	337	441	464	549	197	240	152	544	280	354	184	164	242	415	301	347	206	42	251	256	397	204	174	178	76	220	343	320	166	140	160	370	324	298	223	188	219
ENSGALG00000027256	0	0	0	0	0	0	3	0	0	0	0	2	0	0	0	0	0	0	0	0	0	0	0	0	0	0	0	0	0	0	0	0	0	0	0	0	0	0	0	0	0	0	0	0	0
ENSGALG00000007152	0	0	0	0	0	0	0	0	0	7	0	4	0	0	0	0	0	0	0	0	0	0	0	0	0	0	0	0	0	0	0	0	0	0	6	0	0	0	0	0	0	0	0	0	0
ENSGALG00000017909	0	0	0	0	0	0	0	0	0	0	0	0	0	0	0	0	0	0	0	0	2	0	0	2	0	0	0	0	0	0	0	0	0	0	0	2	0	0	0	0	0	0	0	0	0
ENSGALG00000050374	884	698	879	318	417	592	335	375	416	543	159	441	328	224	231	651	257	374	210	143	287	414	401	580	219	161	146	280	268	340	308	224	192	164	213	309	116	215	97	142	231	417	184	354	276
ENSGALG00000029831	39	35	35	52	37	50	18	36	17	63	39	83	22	10	5	156	203	123	8	7	16	529	289	149	5	0	2	492	268	408	13	13	11	471	519	409	19	12	8	486	407	359	24	20	17
ENSGALG00000042184	221	384	397	194	236	192	292	187	322	332	413	542	237	531	308	393	293	517	148	277	145	539	590	382	274	248	206	527	648	1065	344	271	488	371	1290	881	203	322	196	781	692	716	282	405	282
ENSGALG00000043204	812	1232	981	414	568	451	359	443	243	0	0	0	117	88	59	0	0	4	96	73	121	0	0	0	133	71	69	0	0	0	137	372	92	8	3	0	91	42	54	0	0	0	56	85	40
ENSGALG00000003991	520	722	878	316	373	442	300	418	400	354	441	414	300	224	136	567	367	394	130	321	150	493	327	496	172	157	254	267	371	302	134	148	209	345	185	259	165	163	149	482	289	325	195	201	148
ENSGALG00000003969	1769	1969	2578	1264	1523	1565	1336	1397	1164	1474	1170	1563	1012	857	692	1474	809	1593	393	499	402	1297	1310	1565	500	442	515	1306	1180	1313	718	496	804	959	925	1161	359	458	284	1296	1071	1403	441	492	550
ENSGALG00000052333	42	33	6	42	17	47	20	15	18	37	0	11	15	41	15	42	10	7	14	0	12	24	35	15	35	27	5	0	41	22	20	16	10	8	18	0	14	28	14	0	0	15	12	27	13
ENSGALG00000030563	771	713	284	519	365	527	450	286	385	538	60	278	362	402	327	400	174	184	327	10	144	307	358	258	363	215	220	175	353	273	211	263	160	117	244	163	207	392	275	117	139	187	162	356	200
ENSGALG00000033204	148	195	310	102	107	137	168	158	108	167	392	289	308	71	38	467	397	310	102	147	86	278	136	382	99	110	103	221	210	172	89	37	69	215	262	304	39	82	98	352	198	250	64	81	55
ENSGALG00000004005	656	656	1459	734	575	457	511	523	762	1510	1372	1680	353	360	291	1431	1075	1673	274	741	422	1284	933	768	495	531	300	1493	1089	1518	695	492	1040	786	1000	1459	343	651	816	1131	891	767	525	559	533
ENSGALG00000034357	2	4	6	0	7	0	0	0	0	0	0	0	0	0	4	4	0	4	0	0	0	0	0	0	6	0	0	0	0	0	0	0	0	4	0	0	0	0	0	0	0	0	0	0	0
ENSGALG00000032420	1524	1712	1861	1106	1122	1353	841	1106	878	2001	1895	2708	683	758	434	2419	1478	2569	1117	1113	1073	2123	1664	2047	1309	550	1116	2063	2212	2188	603	954	417	1656	1698	1942	804	793	685	2184	1898	1979	729	753	551
ENSGALG00000045705	196	183	257	90	82	155	69	98	95	217	253	426	50	22	37	155	112	242	33	28	51	126	99	139	25	44	20	148	94	159	37	39	50	95	119	153	34	54	51	200	174	106	56	76	35
ENSGALG00000042939	514	697	870	293	420	315	313	177	257	675	593	821	167	220	164	822	398	19	144	294	164	764	485	634	159	153	205	828	989	676	190	318	214	669	635	843	295	289	227	1387	886	798	458	375	328
ENSGALG00000029536	551	769	669	310	544	616	256	406	282	563	692	756	449	273	207	1043	542	742	210	275	193	776	510	752	237	95	215	458	409	565	118	146	77	425	389	411	174	204	146	603	557	597	204	182	189
ENSGALG00000051199	16	0	0	11	6	17	29	34	31	16	6	21	34	24	27	0	10	0	27	0	32	19	19	27	26	28	17	22	19	27	28	21	55	10	14	16	0	0	34	11	0	20	0	19	26
ENSGALG00000051412	72	60	67	74	74	131	92	1174	1376	240	237	348	2635	2061	1757	342	157	412	620	1653	69	460	89	441	1462	504	699	452	436	339	779	353	1087	162	306	530	31	170	538	219	203	305	756	304	370
ENSGALG00000034014	380	336	409	136	216	204	144	142	133	422	268	318	79	93	88	381	207	263	92	65	70	339	291	315	134	60	100	329	244	303	80	106	44	166	204	249	61	86	94	253	228	237	45	55	89
ENSGALG00000051817	2	3	2	2	3	2	0	1	5	2	0	2	1	0	1	3	0	0	1	0	0	3	2	1	1	0	1	0	1	0	0	0	0	0	2	2	0	1	0	1	1	1	0	1	1
ENSGALG00000036873	813	318	845	935	852	1181	1114	215	182	335	184	322	373	887	447	1068	980	834	395	93	469	1130	1109	483	618	158	481	884	875	303	418	540	164	196	261	630	459	746	569	620	587	145	337	595	362
ENSGALG00000038885	225	281	1351	207	145	244	60	150	107	21	345	174	84	31	25	66	116	115	29	21	30	101	124	129	45	23	39	110	159	261	16	36	29	399	235	130	13	31	16	797	410	280	16	23	24
ENSGALG00000053152	174	153	428	187	76	17	118	106	6	94	37	79	277	145	93	63	53	107	156	186	213	41	131	79	137	274	205	33	53	75	194	189	239	57	90	114	142	201	260	87	48	60	203	29	250
ENSGALG00000051574	9	2	9	3	0	0	0	0	0	0	0	0	0	0	0	0	0	0	0	0	0	0	0	0	0	0	0	0	0	0	0	0	0	8	0	0	0	0	0	0	0	0	0	3	0
ENSGALG00000025907	629	597	1010	797	928	983	640	673	718	746	1129	17	322	353	219	765	615	474	194	126	305	789	1100	792	278	126	208	946	478	310	276	393	145	948	995	390	246	454	242	1200	477	547	320	486	277
ENSGALG00000041520	87	161	237	172	172	106	201	87	58	138	115	102	138	25	37	205	104	134	45	74	21	133	101	114	45	90	24	65	67	89	138	37	102	74	87	116	36	55	39	131	91	78	84	67	18
ENSGALG00000013365	2215	2215	2814	1061	1344	1386	875	1106	901	1224	1084	1162	516	625	662	1463	1135	1048	611	868	471	1178	951	1647	724	203	688	698	519	658	432	549	281	680	641	886	372	396	415	864	914	802	477	623	434
ENSGALG00000049273	75	305	608	651	119	563	145	889	639	332	473	570	689	292	263	208	2	144	255	752	417	287	2	106	310	438	499	321	375	94	470	608	933	312	305	526	504	266	5	347	375	255	355	345	241
ENSGALG00000051573	0	0	0	0	0	0	0	0	0	0	0	0	0	0	0	0	0	0	0	0	0	0	0	0	0	0	0	0	0	0	0	0	0	0	0	0	0	0	5	0	0	0	0	0	0
ENSGALG00000001948	1686	1850	1994	1001	1253	1276	874	1231	693	1011	796	893	794	851	678	1190	874	911	847	773	568	930	804	1325	968	244	611	873	451	625	479	551	352	495	547	650	483	503	445	727	711	654	524	804	596
ENSGALG00000034413	149	272	416	170	103	236	113	196	103	256	160	251	175	148	78	235	195	246	60	60	69	311	172	208	114	45	98	209	135	179	87	83	80	127	123	141	76	90	67	191	105	144	72	97	61
ENSGALG00000045544	0	0	0	0	0	0	0	0	0	0	3	0	0	0	0	0	0	0	0	0	0	0	0	0	2	0	0	0	0	0	0	0	0	0	0	0	0	0	0	0	0	0	0	0	0
ENSGALG00000049217	0	2	2	3	1	0	0	0	2	3	1	2	0	0	0	0	4	2	0	0	0	4	0	0	0	0	2	0	0	0	0	0	0	0	2	0	0	0	0	1	0	0	0	0	0
ENSGALG00000049216	0	0	0	0	3	0	0	0	0	0	0	0	0	0	0	0	0	0	0	0	0	0	0	0	0	0	0	0	0	0	0	0	0	0	0	0	0	0	0	0	0	0	0	0	0
ENSGALG00000049211	0	0	4	0	0	0	0	0	0	0	0	0	0	0	0	0	0	0	0	0	0	4	10	0	0	0	0	0	0	0	0	0	0	0	0	2	0	0	0	2	0	0	2	0	0
ENSGALG00000049210	7	9	19	11	9	12	6	8	3	59	24	18	1	3	3	34	19	44	14	0	7	28	6	14	14	0	3	9	6	11	13	0	11	1	1	9	1	4	0	0	1	13	6	3	2
ENSGALG00000051391	0	0	0	0	0	0	0	0	0	0	0	5	0	0	0	0	0	2	0	0	0	0	0	0	0	0	0	0	0	0	0	0	0	0	0	0	0	0	0	0	0	0	0	0	0
ENSGALG00000051393	0	0	0	0	0	0	0	0	0	9	0	3	0	0	0	2	0	0	0	0	0	8	4	0	0	0	0	0	0	0	0	0	0	4	0	0	0	0	3	0	0	0	0	0	0
ENSGALG00000051394	0	0	0	0	0	0	0	0	0	0	0	0	0	0	0	0	0	0	0	0	0	0	0	0	0	0	0	0	0	0	0	0	0	3	0	0	0	0	0	0	0	0	0	0	0
ENSGALG00000037194	28	4	0	0	0	0	0	0	0	60	0	37	0	0	0	5	0	3	0	0	0	0	0	0	0	0	0	0	3	0	0	0	0	2	7	0	0	0	0	0	5	0	7	0	0
ENSGALG00000051399	0	1	0	0	0	0	0	0	0	1	0	0	0	0	0	0	0	0	0	0	0	0	0	0	0	0	0	0	0	0	0	0	0	0	2	0	0	0	0	0	0	0	0	0	0
ENSGALG00000049235	16	5	6	10	7	13	8	28	10	25	0	19	4	0	7	15	17	8	6	18	9	24	4	11	22	0	8	33	0	0	3	0	0	0	0	0	9	14	4	0	0	0	14	12	3
ENSGALG00000030475	102	1269	1411	1218	124	1166	827	88	82	15	916	1109	90	792	55	99	907	70	25	8	548	115	993	1164	539	279	592	231	84	1157	8	830	417	8	112	187	118	94	108	1103	1306	887	97	764	114
ENSGALG00000041763	176	160	184	130	186	266	298	323	136	126	76	96	84	57	43	149	122	98	91	50	54	132	56	232	70	34	74	60	79	74	75	48	21	42	58	37	31	60	108	110	37	51	96	50	62
ENSGALG00000028612	17551	19408	12469	124370	97921	123153	23597	54688	79609	170	0	1839	3000	15960	4512	0	2405	0	8414	15205	8412	4	0	6	29412	4374	17933	0	17	0	19789	11082	13307	0	0	0	10109	10909	8722	0	0	0	12157	8384	15610
ENSGALG00000025882	739	672	882	492	360	504	350	429	426	602	398	595	485	259	183	683	514	423	120	289	143	522	418	630	165	140	259	229	240	315	204	158	204	179	348	303	158	132	154	248	212	262	161	180	122
ENSGALG00000025323	2	3	2	0	0	2	1	0	0	1	0	0	0	0	0	0	0	0	0	0	2	1	3	0	0	0	0	0	2	0	1	0	0	0	0	0	0	0	0	1	0	0	0	0	0
ENSGALG00000001021	165	134	90	1074	925	966	748	246	436	18	6	36	311	821	733	19	23	6	348	73	479	14	23	8	302	334	444	35	36	21	539	1031	1650	34	28	23	645	766	559	43	44	24	723	735	965
ENSGALG00000033996	335	242	347	204	212	292	173	154	100	200	150	131	77	109	52	146	132	163	31	83	76	116	102	93	64	36	114	130	120	56	43	57	16	109	81	106	66	50	26	72	87	88	45	42	50
ENSGALG00000032178	775	963	1125	41	473	117	316	392	283	392	364	551	11	371	221	77	356	424	302	499	310	9	24	30	491	47	365	448	16	304	49	347	83	221	9	324	406	401	313	388	498	293	500	491	459
ENSGALG00000040582	12	0	23	16	18	0	6	0	4	4	0	0	0	0	0	0	0	0	0	0	0	0	0	0	0	0	0	0	0	0	0	0	0	0	0	0	0	0	0	0	0	0	0	0	0
ENSGALG00000001036	344	309	556	221	214	281	131	204	174	156	157	207	136	96	88	234	150	176	85	117	56	150	207	258	103	16	78	144	168	168	57	112	54	89	122	153	79	92	67	155	137	149	90	68	83
ENSGALG00000048369	0	0	0	0	0	0	0	0	0	72	0	0	0	0	0	0	0	0	0	0	0	0	0	0	0	0	0	0	0	0	0	0	0	0	0	0	0	0	0	0	0	2	0	0	0
ENSGALG00000030139	32	57	45	14	35	34	42	36	11	16	33	32	54	22	6	59	61	15	33	12	50	106	96	108	15	92	16	30	33	35	20	23	54	21	50	90	62	54	54	15	24	34	40	35	45
ENSGALG00000007144	417	368	444	413	348	533	309	366	252	677	372	606	436	501	169	1204	911	311	170	60	123	1373	1070	1083	272	100	189	64	503	604	144	103	105	476	654	165	102	137	165	505	92	169	80	107	125
ENSGALG00000050624	0	6	0	0	0	0	0	0	0	0	0	0	0	0	0	0	0	0	0	0	0	0	0	0	0	0	0	0	0	0	0	0	0	0	0	0	0	0	0	0	0	0	0	0	0
ENSGALG00000008325	1179	1849	426	563	442	996	371	412	290	671	369	298	103	364	159	240	220	202	103	149	116	451	494	589	101	48	224	457	186	254	164	226	34	348	223	248	89	148	140	453	624	372	176	168	208
ENSGALG00000008951	35	37	27	9	19	17	21	12	0	30	15	25	0	10	4	54	7	24	8	0	6	20	41	64	13	0	21	33	24	36	10	6	0	16	32	32	15	11	0	35	41	35	7	3	6
ENSGALG00000046897	0	0	2	0	0	0	0	0	0	0	0	0	0	0	0	0	0	0	0	0	1	0	0	0	0	0	0	0	0	0	0	0	0	0	0	0	0	0	0	0	0	0	0	0	0
ENSGALG00000046895	0	0	0	0	0	0	0	0	0	0	0	0	0	0	0	0	3	0	0	0	0	0	0	0	0	0	0	0	0	0	0	0	0	0	2	0	0	2	0	0	0	0	0	0	0
ENSGALG00000046892	0	0	0	0	0	0	0	0	0	0	0	0	0	0	0	0	0	0	0	0	0	0	0	0	0	0	0	0	0	0	0	0	0	0	0	0	0	4	0	0	0	0	0	0	0
ENSGALG00000046893	0	0	0	0	0	0	0	0	0	0	0	0	0	0	0	0	0	3	0	0	0	0	0	0	0	0	0	0	0	0	0	0	0	0	0	0	0	0	0	0	0	0	0	0	0
ENSGALG00000046890	0	0	3	0	0	2	0	0	0	28	0	5	0	0	0	0	0	0	0	0	0	0	0	0	0	0	0	0	0	2	0	0	0	2	0	0	0	2	0	0	0	0	0	0	0
ENSGALG00000046891	0	0	0	0	0	0	0	0	0	0	0	0	0	0	0	1	0	3	0	0	0	0	0	0	0	1	0	0	1	0	0	0	0	1	0	0	2	1	0	0	1	0	0	2	0
ENSGALG00000036244	0	0	5	0	2	0	0	0	0	0	0	2	0	0	0	0	0	0	0	0	0	0	0	0	0	1	0	0	0	0	0	0	0	0	0	0	0	0	0	0	0	0	0	0	0
ENSGALG00000008988	744	890	464	321	462	608	247	270	253	581	153	357	56	374	216	439	224	237	134	46	76	400	315	443	167	17	218	273	304	285	168	142	26	134	372	175	80	129	91	160	255	243	109	121	85
ENSGALG00000037310	0	0	15	0	0	0	0	0	0	11	4	12	0	0	0	0	4	9	0	0	0	2	5	0	0	0	0	11	0	0	0	0	0	7	0	4	0	0	0	6	7	12	0	0	0
ENSGALG00000005796	1886	2190	2878	1366	1702	1857	668	751	922	3754	2159	3934	576	778	936	2109	1138	1368	222	480	634	1563	2398	1768	308	647	578	2492	3272	2172	2340	2264	2056	2228	2693	3797	959	1393	1246	3168	3232	2545	2609	1682	2133
ENSGALG00000005803	362	423	263	265	263	367	181	109	124	395	64	112	67	122	89	124	64	49	46	2	36	98	94	85	67	44	91	76	111	88	75	57	14	45	99	33	44	51	25	64	37	40	12	46	31
ENSGALG00000047589	0	0	5	0	0	0	0	0	0	0	3	4	0	0	0	0	0	2	0	0	0	3	0	0	0	0	0	3	5	0	0	0	0	0	1	0	0	0	0	6	0	0	0	0	0
ENSGALG00000047588	1	2	1	0	2	0	0	1	3	12	5	15	0	1	1	2	7	0	0	0	0	3	2	2	0	0	1	3	1	0	0	0	0	0	4	1	0	1	1	2	5	2	0	1	0
ENSGALG00000029235	14	58	49	0	6	17	0	3	3	2	16	0	0	3	0	9	4	0	0	0	0	0	0	0	0	0	0	0	0	0	0	0	0	0	7	0	0	0	3	0	0	0	0	0	0
ENSGALG00000018286	7	7	3	10	2	9	4	7	3	10	6	5	0	4	6	12	11	10	3	2	0	18	14	18	5	3	11	5	5	2	3	3	0	2	5	1	0	3	9	9	6	12	4	5	1
ENSGALG00000020316	50	54	120	51	101	83	82	82	45	45	57	55	53	10	21	0	42	0	17	29	17	10	0	11	15	13	35	0	15	6	25	29	22	5	11	25	12	96	49	15	17	13	96	68	57
ENSGALG00000053013	5	10	18	11	10	15	0	3	3	113	79	47	3	4	1	22	8	40	11	1	0	11	10	14	7	0	0	54	43	53	0	2	0	13	24	24	4	0	4	0	70	22	0	3	2
ENSGALG00000025792	186	106	199	78	105	127	39	34	31	116	69	103	29	33	37	110	39	58	40	9	30	74	81	142	47	26	74	84	75	96	34	25	16	41	56	74	24	24	34	86	69	62	19	16	16
ENSGALG00000013135	3218	3989	4186	1614	1697	1908	903	991	1196	5058	4139	5697	259	833	614	4550	2818	2995	564	542	538	3270	2455	4492	795	123	940	3298	3389	2939	683	994	214	2547	3177	3321	613	975	802	3496	3420	2896	942	1131	796
ENSGALG00000013131	295	409	505	248	238	338	186	228	262	281	275	302	183	282	195	229	229	239	118	316	234	207	169	302	121	80	204	208	207	101	88	315	66	174	188	137	293	294	253	191	188	172	240	371	249
ENSGALG00000051335	733	974	649	379	483	570	212	137	207	475	121	364	78	267	221	305	227	182	128	150	95	233	207	199	250	52	180	301	371	331	151	253	67	172	494	246	220	276	209	288	362	296	227	374	185
ENSGALG00000051650	3	9	0	2	0	0	0	0	0	6	0	9	0	0	0	7	0	4	0	0	0	0	0	6	2	0	0	0	0	5	0	0	0	0	0	0	0	0	0	0	0	2	0	0	0
ENSGALG00000050189	14	5	7	21	21	18	18	11	18	35	15	11	4	31	14	24	20	14	13	4	7	28	4	23	30	8	12	14	13	3	21	13	2	21	10	21	12	15	24	13	9	5	20	34	24
ENSGALG00000050319	2	0	0	0	0	0	0	0	0	18	6	0	0	0	0	3	0	12	0	0	0	0	0	0	0	0	0	8	0	0	0	0	0	0	0	0	0	0	0	0	0	0	0	0	0
ENSGALG00000034955	125	614	748	757	594	591	627	813	630	465	812	231	683	436	42	747	577	703	327	829	488	435	534	628	366	811	425	683	558	679	694	543	900	589	544	846	555	550	698	756	620	525	615	671	545
ENSGALG00000031737	8	0	19	0	3	0	0	0	0	24	0	0	2	0	0	0	5	0	5	2	5	14	0	0	4	0	6	0	0	0	0	0	0	6	0	0	0	2	4	0	0	0	0	0	0
ENSGALG00000044662	0	0	0	0	0	0	0	0	0	0	0	0	0	0	0	0	6	0	0	0	0	4	0	0	3	0	0	0	8	0	0	0	0	0	0	0	0	3	0	0	0	0	0	0	0
ENSGALG00000047648	2	39	12	6	53	0	0	0	0	28	21	22	11	0	0	36	47	33	0	0	5	32	12	23	4	21	11	29	9	0	0	16	26	47	32	10	0	7	12	56	5	46	0	9	0
ENSGALG00000038256	0	0	0	0	0	2	0	0	0	3	0	6	0	0	0	4	14	10	0	0	0	0	9	0	0	4	0	9	4	10	0	0	0	0	6	23	0	0	3	6	5	9	0	0	0
ENSGALG00000047859	0	0	0	0	0	0	0	0	0	0	0	0	0	0	0	0	0	0	0	0	0	30	0	0	0	0	0	0	0	0	0	0	0	0	0	41	0	0	0	0	0	0	0	0	0
ENSGALG00000048165	87	137	0	0	68	0	0	0	0	2	0	140	0	0	14	106	0	0	0	0	12	0	0	55	0	0	0	0	0	0	0	0	0	0	0	0	0	0	0	0	0	0	0	0	0
ENSGALG00000043009	46	66	102	26	42	25	12	12	18	186	135	247	13	12	6	69	48	104	8	12	4	48	70	68	10	11	5	115	130	98	19	13	8	103	87	103	9	7	19	214	133	92	10	12	18
ENSGALG00000046983	16	14	30	38	26	35	17	8	6	104	113	111	59	14	6	177	226	242	11	19	32	73	128	178	37	63	61	111	197	157	45	39	51	150	149	226	11	44	23	229	125	227	37	33	0
ENSGALG00000038692	0	0	0	0	1	1	0	0	0	0	0	0	0	0	0	1	1	1	0	0	0	0	0	0	0	0	0	2	1	2	2	0	0	0	2	0	0	3	0	2	3	3	1	2	0
ENSGALG00000053649	5	22	22	11	36	18	0	6	4	80	108	171	69	21	0	94	168	175	11	25	48	75	161	171	19	24	62	59	136	92	35	39	20	237	201	340	32	67	38	235	155	256	73	72	36
ENSGALG00000051271	582	514	1153	582	586	139	341	303	358	805	1296	933	392	195	124	742	912	637	259	498	121	919	700	154	178	216	82	600	571	408	248	187	184	514	301	1191	117	165	200	1134	709	941	217	258	151
ENSGALG00000017840	13	8	15	2	6	5	0	1	5	10	2	14	2	2	0	6	3	5	1	0	1	3	12	9	2	1	4	2	2	4	2	3	1	2	4	8	0	1	2	0	6	2	0	1	0
ENSGALG00000048338	6	6	14	7	18	9	3	0	0	35	40	41	5	0	6	58	56	59	0	7	6	34	53	49	10	8	11	45	55	42	22	11	8	26	27	35	10	17	0	38	29	52	11	14	4
ENSGALG00000047202	20	41	21	9	12	50	31	75	51	4	0	0	17	140	65	52	11	8	40	62	36	36	0	5	19	59	71	25	6	11	38	2	115	0	3	7	31	42	23	0	0	0	44	25	57
ENSGALG00000046730	0	0	0	0	0	0	0	0	0	0	6	0	0	0	0	0	0	0	0	0	0	0	0	0	0	0	0	0	0	0	0	0	0	3	0	0	0	0	0	110	0	0	0	0	0
ENSGALG00000044069	253	230	245	162	185	226	97	137	114	225	151	226	68	83	58	231	153	178	32	11	40	119	87	130	58	21	23	98	148	139	37	79	15	33	80	57	33	32	33	46	41	83	24	31	0
ENSGALG00000050409	39	13	8	1	4	13	1	9	4	5	2	3	1	15	2	2	3	4	1	1	0	1	1	1	4	0	0	0	2	12	0	109	1	1	1	7	0	51	0	1	2	7	1	54	1
ENSGALG00000004621	206	211	155	60	56	136	40	47	32	559	69	274	9	16	14	229	165	226	25	20	21	223	190	152	54	4	75	375	401	218	72	48	6	165	233	185	31	69	44	173	152	211	28	107	20
ENSGALG00000004663	222	215	106	76	83	123	35	63	49	226	38	108	6	55	34	175	81	77	14	14	12	129	98	47	43	0	30	74	78	66	24	24	0	39	124	49	12	41	10	37	65	42	18	14	0
ENSGALG00000004570	391	305	421	232	302	511	285	177	224	475	117	275	24	225	135	341	242	173	72	44	66	348	273	325	122	26	190	148	245	205	136	130	6	127	218	143	77	152	125	136	158	130	47	122	98
ENSGALG00000004593	477	651	239	127	238	228	111	159	79	2249	692	1952	43	82	54	2047	1284	2247	45	23	24	1839	2152	2557	50	16	109	1305	2190	1844	56	65	10	1173	1439	873	28	82	60	1046	1103	879	23	45	19
ENSGALG00000046850	8	13	27	3	8	6	2	2	6	2	3	1	3	1	0	1	1	3	2	0	2	3	1	4	1	2	1	3	3	0	0	0	3	1	2	6	0	1	0	3	0	5	2	1	0
ENSGALG00000052600	12	19	17	0	4	8	1	2	1	4	2	7	2	3	2	2	2	6	1	1	2	12	10	5	1	2	1	3	8	2	1	5	3	3	7	10	1	7	1	3	3	4	0	1	1
ENSGALG00000036550	1651	1819	2552	1099	1352	1296	887	1039	1005	1513	1531	1718	356	1178	845	1740	1002	1156	470	1028	623	1040	773	1425	710	142	665	902	955	844	435	596	203	679	719	813	397	599	432	876	981	836	523	629	623
ENSGALG00000030776	362	506	728	336	319	1022	326	520	433	4280	6929	7241	597	677	512	3791	2440	6217	167	504	216	3934	2526	3828	245	251	350	4255	3281	3848	991	287	574	1905	2191	2655	248	257	164	3932	3586	2706	323	200	84
ENSGALG00000035201	125	94	255	93	292	297	207	274	197	231	319	294	139	242	192	289	193	267	88	301	206	181	141	389	201	29	204	287	171	210	115	186	71	159	16	287	181	159	199	333	159	241	286	209	270
ENSGALG00000013920	1202	1152	1293	581	784	777	783	707	715	2479	819	920	131	1115	606	859	567	728	386	376	413	674	529	961	596	72	466	769	635	726	321	499	134	473	558	531	355	620	349	807	674	731	486	467	541
ENSGALG00000033226	4100	5898	4730	1463	2226	2665	284	459	367	3786	812	3989	183	331	329	1499	1078	2032	149	76	120	995	3099	1458	302	71	324	4220	5988	3666	299	274	103	2802	3538	2799	202	332	203	4461	2199	1708	254	284	204
ENSGALG00000003297	1867	2001	2895	831	1022	1233	512	633	671	1359	821	1478	410	303	217	1166	968	951	198	209	242	1098	935	967	363	180	375	744	1013	595	301	389	302	785	704	870	203	326	314	939	867	619	378	408	240
ENSGALG00000002692	11	36	12	0	7	2	0	0	2	0	3	3	0	0	0	2	9	7	0	0	2	4	0	0	0	0	7	0	0	0	0	0	0	0	0	0	0	0	0	0	0	0	0	0	0
ENSGALG00000052017	0	2	0	0	0	0	0	0	0	4	0	12	0	0	0	7	0	5	0	0	0	14	13	0	0	0	0	0	2	0	0	0	1	12	0	0	0	8	0	0	0	0	0	0	0
ENSGALG00000030844	783	854	816	427	515	482	317	328	307	670	648	779	133	369	235	583	373	571	208	178	194	528	529	592	322	67	300	519	411	352	253	251	98	173	286	378	187	241	134	351	267	291	190	284	292
ENSGALG00000013926	144	174	90	27	61	69	28	18	26	158	86	118	4	23	10	99	88	77	19	17	25	62	74	126	34	0	24	21	60	47	15	20	2	40	33	16	28	40	16	48	30	20	19	21	0
ENSGALG00000000451	2	4	0	0	0	0	0	0	0	82	62	0	0	0	2	0	0	0	0	0	0	0	0	0	0	0	0	0	2	0	0	0	0	0	0	0	0	2	0	0	0	0	0	0	0
[truncated: 19,855 more rows]

## Sheet: Table S4
Table S4. BM_stage_specificially_expressed_gene_list
E12	E17	D1	D7	D21	D56	D98	D140	D180
ENSGALG00000050221	ENSGALG00000013376	ENSGALG00000041938	ENSGALG00000035221	ENSGALG00000050450	ENSGALG00000047402	ENSGALG00000040292	ENSGALG00000046756	ENSGALG00000050220
ENSGALG00000014979	ENSGALG00000016664	ENSGALG00000047881	ENSGALG00000046994	ENSGALG00000049943	ENSGALG00000053581	ENSGALG00000025264	ENSGALG00000046753	ENSGALG00000054933
ENSGALG00000045914	ENSGALG00000040514	ENSGALG00000026707	ENSGALG00000048094	ENSGALG00000025546	ENSGALG00000051344	ENSGALG00000053935	ENSGALG00000047405	ENSGALG00000051884
ENSGALG00000042244	ENSGALG00000051965	ENSGALG00000054537	ENSGALG00000023032	ENSGALG00000033415	ENSGALG00000047307	ENSGALG00000048622	ENSGALG00000026814	ENSGALG00000049462
ENSGALG00000046752	ENSGALG00000047883	ENSGALG00000027256	ENSGALG00000049861	ENSGALG00000017909	ENSGALG00000052901	ENSGALG00000054155	ENSGALG00000052713	ENSGALG00000052455
ENSGALG00000052925	ENSGALG00000052555	ENSGALG00000033386	ENSGALG00000030516	ENSGALG00000052293	ENSGALG00000025549	ENSGALG00000055097	ENSGALG00000050710	ENSGALG00000054533
ENSGALG00000015140	ENSGALG00000052551	ENSGALG00000033036	ENSGALG00000051343	ENSGALG00000049583	ENSGALG00000052548	ENSGALG00000039896	ENSGALG00000030724	ENSGALG00000042128
ENSGALG00000047482	ENSGALG00000048118	ENSGALG00000052316	ENSGALG00000005896	ENSGALG00000050740	ENSGALG00000047232	ENSGALG00000046919	ENSGALG00000053740	ENSGALG00000053993
ENSGALG00000054058	ENSGALG00000036994	ENSGALG00000047970	ENSGALG00000021561	ENSGALG00000054029	ENSGALG00000053629	ENSGALG00000027124	ENSGALG00000053744	ENSGALG00000025186
ENSGALG00000053588	ENSGALG00000048635	ENSGALG00000049708	ENSGALG00000047790	ENSGALG00000055033	ENSGALG00000045544	ENSGALG00000016554	ENSGALG00000052886	ENSGALG00000050284
ENSGALG00000053053	ENSGALG00000033499	ENSGALG00000027356	ENSGALG00000050560	ENSGALG00000014746	ENSGALG00000053396	ENSGALG00000051315	ENSGALG00000052909	ENSGALG00000053747
ENSGALG00000054860	ENSGALG00000053504	ENSGALG00000053556	ENSGALG00000050399	ENSGALG00000050724	ENSGALG00000031869	ENSGALG00000046411	ENSGALG00000049555	ENSGALG00000048568
ENSGALG00000051961	ENSGALG00000020989	ENSGALG00000048649	ENSGALG00000015616	ENSGALG00000051477	ENSGALG00000050048	ENSGALG00000055039	ENSGALG00000050507	ENSGALG00000047004
ENSGALG00000036598	ENSGALG00000016557	ENSGALG00000054340	ENSGALG00000054031	ENSGALG00000050094	ENSGALG00000049776	ENSGALG00000012005	ENSGALG00000049941	ENSGALG00000052630
ENSGALG00000052082	ENSGALG00000054721	ENSGALG00000054348	ENSGALG00000049962	ENSGALG00000051227	ENSGALG00000046926	ENSGALG00000027894	ENSGALG00000053966	ENSGALG00000049802
ENSGALG00000047306	ENSGALG00000047476	ENSGALG00000051580	ENSGALG00000045619	ENSGALG00000051004	ENSGALG00000032170	ENSGALG00000042288	ENSGALG00000049745	ENSGALG00000054275
ENSGALG00000036861	ENSGALG00000021724	ENSGALG00000048163	ENSGALG00000051255	ENSGALG00000053375	ENSGALG00000050259	ENSGALG00000049102	ENSGALG00000016740	ENSGALG00000049681
ENSGALG00000048464	ENSGALG00000028478	ENSGALG00000053821	ENSGALG00000047625	ENSGALG00000039554	ENSGALG00000050670	ENSGALG00000048654	ENSGALG00000051265	ENSGALG00000054810
ENSGALG00000054622	ENSGALG00000049291	ENSGALG00000034306	ENSGALG00000050762	ENSGALG00000050192	ENSGALG00000013659	ENSGALG00000051940	ENSGALG00000051337	ENSGALG00000026297
ENSGALG00000013287	ENSGALG00000021451	ENSGALG00000029779	ENSGALG00000053880	ENSGALG00000047502	ENSGALG00000051877	ENSGALG00000051768	ENSGALG00000049463	ENSGALG00000054335
ENSGALG00000039187	ENSGALG00000047218	ENSGALG00000048046	ENSGALG00000050305	ENSGALG00000051087	ENSGALG00000051007	ENSGALG00000052430	ENSGALG00000048784	ENSGALG00000008048
ENSGALG00000047146	ENSGALG00000039479	ENSGALG00000047921	ENSGALG00000048997	ENSGALG00000041612	ENSGALG00000054338	ENSGALG00000047449	ENSGALG00000054476	ENSGALG00000051081
ENSGALG00000055047	ENSGALG00000046910	ENSGALG00000052631	ENSGALG00000049209	ENSGALG00000043909	ENSGALG00000050809	ENSGALG00000051826	ENSGALG00000053127	ENSGALG00000054680
ENSGALG00000054023	ENSGALG00000049439	ENSGALG00000054814	ENSGALG00000051694	ENSGALG00000052433	ENSGALG00000048610	ENSGALG00000052814	ENSGALG00000052981	ENSGALG00000017052
ENSGALG00000041225	ENSGALG00000049216	ENSGALG00000052836	ENSGALG00000051863	ENSGALG00000049409	ENSGALG00000048924	ENSGALG00000050638	ENSGALG00000018261	ENSGALG00000005361
ENSGALG00000053358	ENSGALG00000052553	ENSGALG00000050035	ENSGALG00000017789	ENSGALG00000028207	ENSGALG00000054519	ENSGALG00000048686	ENSGALG00000051573	ENSGALG00000003075
ENSGALG00000054293	ENSGALG00000053981	ENSGALG00000054416	ENSGALG00000048423	ENSGALG00000046834	ENSGALG00000046288	ENSGALG00000046835	ENSGALG00000051393	ENSGALG00000051825
ENSGALG00000054299	ENSGALG00000003895	ENSGALG00000047075	ENSGALG00000053972	ENSGALG00000031799	ENSGALG00000027144	ENSGALG00000054314	ENSGALG00000046895	ENSGALG00000052910
ENSGALG00000050996	ENSGALG00000038755	ENSGALG00000047387	ENSGALG00000053040	ENSGALG00000048801	ENSGALG00000053067	ENSGALG00000046989	ENSGALG00000046892	ENSGALG00000047228
ENSGALG00000047485	ENSGALG00000054228	ENSGALG00000007791	ENSGALG00000051014	ENSGALG00000053928	ENSGALG00000026577	ENSGALG00000049614	ENSGALG00000053426	ENSGALG00000026011
ENSGALG00000048090	ENSGALG00000051664	ENSGALG00000031075	ENSGALG00000053364	ENSGALG00000034125	ENSGALG00000025215	ENSGALG00000054105	ENSGALG00000053988	ENSGALG00000050466
ENSGALG00000033720	ENSGALG00000052668	ENSGALG00000051162	ENSGALG00000047134	ENSGALG00000047539	ENSGALG00000047934	ENSGALG00000013169	ENSGALG00000054749	ENSGALG00000004665
ENSGALG00000018255	ENSGALG00000054679	ENSGALG00000012748	ENSGALG00000047398	ENSGALG00000041737	ENSGALG00000030885	ENSGALG00000053802	ENSGALG00000051105	ENSGALG00000049124
ENSGALG00000025378	ENSGALG00000054093	ENSGALG00000047053	ENSGALG00000048088	ENSGALG00000053438	ENSGALG00000050620	ENSGALG00000049047	ENSGALG00000049678	ENSGALG00000035835
ENSGALG00000050070	ENSGALG00000032696	ENSGALG00000037380	ENSGALG00000029130	ENSGALG00000050654	ENSGALG00000048739	ENSGALG00000046918	ENSGALG00000050273	ENSGALG00000017017
ENSGALG00000054318	ENSGALG00000021727	ENSGALG00000009349	ENSGALG00000053137	ENSGALG00000000274	ENSGALG00000046869	ENSGALG00000047685	ENSGALG00000052313	ENSGALG00000053546
ENSGALG00000052001	ENSGALG00000037701	ENSGALG00000047937	ENSGALG00000041779	ENSGALG00000051576	ENSGALG00000049495	ENSGALG00000053547	ENSGALG00000050050	ENSGALG00000050031
ENSGALG00000046657	ENSGALG00000048061	ENSGALG00000053779	ENSGALG00000028815	ENSGALG00000049704	ENSGALG00000048673	ENSGALG00000048791	ENSGALG00000048353	ENSGALG00000051027
ENSGALG00000037111	ENSGALG00000050822	ENSGALG00000050302	ENSGALG00000033311	ENSGALG00000052607	ENSGALG00000051021	ENSGALG00000048428	ENSGALG00000053904	ENSGALG00000019696
ENSGALG00000050333	ENSGALG00000014900	ENSGALG00000050591	ENSGALG00000054216	ENSGALG00000051224	ENSGALG00000052256	ENSGALG00000047941	ENSGALG00000049314	ENSGALG00000018295
ENSGALG00000006515	ENSGALG00000051215	ENSGALG00000051530	ENSGALG00000015373	ENSGALG00000051709	ENSGALG00000052047	ENSGALG00000054979	ENSGALG00000047950	ENSGALG00000053467
ENSGALG00000053311	ENSGALG00000052266	ENSGALG00000052288	ENSGALG00000050457	ENSGALG00000025285	ENSGALG00000052485	ENSGALG00000027663	ENSGALG00000049878	ENSGALG00000049425
ENSGALG00000052887	ENSGALG00000046692	ENSGALG00000048732	ENSGALG00000048721	ENSGALG00000023897	ENSGALG00000047513	ENSGALG00000027781	ENSGALG00000047252	ENSGALG00000048058
ENSGALG00000015928	ENSGALG00000047809	ENSGALG00000048971	ENSGALG00000017933	ENSGALG00000047450	ENSGALG00000025335	ENSGALG00000050669	ENSGALG00000054928	ENSGALG00000048746
ENSGALG00000025548	ENSGALG00000048678	ENSGALG00000048342	ENSGALG00000049135	ENSGALG00000025526	ENSGALG00000047818	ENSGALG00000051781	ENSGALG00000052973	ENSGALG00000053049
ENSGALG00000054938	ENSGALG00000047419	ENSGALG00000053265	ENSGALG00000053718	ENSGALG00000052773	ENSGALG00000047607	ENSGALG00000050233	ENSGALG00000049509	ENSGALG00000037329
ENSGALG00000051261	ENSGALG00000054161	ENSGALG00000044330	ENSGALG00000049245	ENSGALG00000017912	ENSGALG00000050231	ENSGALG00000054800	ENSGALG00000048663	ENSGALG00000048406
ENSGALG00000050137	ENSGALG00000050367	ENSGALG00000017343	ENSGALG00000049320	ENSGALG00000049380	ENSGALG00000052091	ENSGALG00000052315	ENSGALG00000054022	ENSGALG00000019651
ENSGALG00000050135	ENSGALG00000048247	ENSGALG00000054837	ENSGALG00000014989	ENSGALG00000024502	ENSGALG00000049739	ENSGALG00000047204	ENSGALG00000023179	ENSGALG00000054921
ENSGALG00000042837	ENSGALG00000001932	ENSGALG00000049701	ENSGALG00000055121	ENSGALG00000046735	ENSGALG00000053360	ENSGALG00000053417	ENSGALG00000053083	ENSGALG00000051956
ENSGALG00000045823	ENSGALG00000050655	ENSGALG00000054974	ENSGALG00000034436	ENSGALG00000054644	ENSGALG00000051257	ENSGALG00000050402	ENSGALG00000053087	ENSGALG00000018256
ENSGALG00000051741	ENSGALG00000050282	ENSGALG00000048153	ENSGALG00000048541	ENSGALG00000049309	ENSGALG00000051758	ENSGALG00000025318	ENSGALG00000015434	ENSGALG00000050126
ENSGALG00000031164	ENSGALG00000038424	ENSGALG00000049016	ENSGALG00000034994	ENSGALG00000049926	ENSGALG00000053288	ENSGALG00000047363	ENSGALG00000055038	ENSGALG00000043252
ENSGALG00000052458	ENSGALG00000028552	ENSGALG00000050311	ENSGALG00000031402	ENSGALG00000003857	ENSGALG00000051198	ENSGALG00000038058	ENSGALG00000051057	ENSGALG00000054852
ENSGALG00000052984	ENSGALG00000049106	ENSGALG00000051703	ENSGALG00000052869	ENSGALG00000053687	ENSGALG00000049353	ENSGALG00000050779	ENSGALG00000054969	ENSGALG00000054859
ENSGALG00000052982	ENSGALG00000054747	ENSGALG00000052415		ENSGALG00000054556	ENSGALG00000000365	ENSGALG00000054881	ENSGALG00000028991	ENSGALG00000027990
ENSGALG00000050583	ENSGALG00000030006	ENSGALG00000046956		ENSGALG00000053712	ENSGALG00000048375	ENSGALG00000054557	ENSGALG00000048168	ENSGALG00000053892
ENSGALG00000051186	ENSGALG00000047799	ENSGALG00000050436		ENSGALG00000054712	ENSGALG00000053205	ENSGALG00000049695	ENSGALG00000052264	ENSGALG00000053898
ENSGALG00000046911	ENSGALG00000047429	ENSGALG00000049679		ENSGALG00000050917	ENSGALG00000050932	ENSGALG00000028380	ENSGALG00000053820	ENSGALG00000048404
ENSGALG00000028424	ENSGALG00000029510	ENSGALG00000055070		ENSGALG00000048548	ENSGALG00000048718	ENSGALG00000050722	ENSGALG00000049936	ENSGALG00000038935
ENSGALG00000042119	ENSGALG00000050019	ENSGALG00000027718		ENSGALG00000048549	ENSGALG00000049763	ENSGALG00000054790	ENSGALG00000052059	ENSGALG00000054953
ENSGALG00000048010	ENSGALG00000049720	ENSGALG00000028051			ENSGALG00000048407	ENSGALG00000051774	ENSGALG00000047084	ENSGALG00000007998
ENSGALG00000030997	ENSGALG00000016725	ENSGALG00000049972			ENSGALG00000049075	ENSGALG00000044037	ENSGALG00000051507	ENSGALG00000052145
ENSGALG00000048908	ENSGALG00000052778	ENSGALG00000053515			ENSGALG00000049895	ENSGALG00000052409	ENSGALG00000048378	ENSGALG00000002792
ENSGALG00000048909	ENSGALG00000050377	ENSGALG00000046392			ENSGALG00000050641	ENSGALG00000052867	ENSGALG00000049434	ENSGALG00000052339
ENSGALG00000039105	ENSGALG00000047420	ENSGALG00000050320			ENSGALG00000054000		ENSGALG00000053171	ENSGALG00000050643
ENSGALG00000047035	ENSGALG00000048130	ENSGALG00000046845			ENSGALG00000048141		ENSGALG00000051155	ENSGALG00000048840
ENSGALG00000025279	ENSGALG00000051691	ENSGALG00000015418			ENSGALG00000050544		ENSGALG00000050280	ENSGALG00000050184
ENSGALG00000054390	ENSGALG00000020458	ENSGALG00000017894			ENSGALG00000055099		ENSGALG00000048569	ENSGALG00000028877
ENSGALG00000033579	ENSGALG00000016577	ENSGALG00000051987			ENSGALG00000049792		ENSGALG00000033639	ENSGALG00000017907
ENSGALG00000051399	ENSGALG00000054408	ENSGALG00000025161			ENSGALG00000050697		ENSGALG00000050672	ENSGALG00000055125
ENSGALG00000050624	ENSGALG00000047246	ENSGALG00000047666			ENSGALG00000052617		ENSGALG00000048360	ENSGALG00000052365
ENSGALG00000037310	ENSGALG00000047783	ENSGALG00000047669			ENSGALG00000031804		ENSGALG00000051794	ENSGALG00000049086
ENSGALG00000047589	ENSGALG00000054042	ENSGALG00000001806			ENSGALG00000026584		ENSGALG00000050970	ENSGALG00000050790
ENSGALG00000050319	ENSGALG00000053232	ENSGALG00000050293					ENSGALG00000048650	ENSGALG00000049827
ENSGALG00000049156	ENSGALG00000011354	ENSGALG00000039166					ENSGALG00000054071	ENSGALG00000049243
ENSGALG00000015294	ENSGALG00000050357	ENSGALG00000002860					ENSGALG00000048681
ENSGALG00000048993	ENSGALG00000036223	ENSGALG00000049815					ENSGALG00000048445
ENSGALG00000050867	ENSGALG00000029526	ENSGALG00000050215					ENSGALG00000050594
ENSGALG00000051390	ENSGALG00000047983	ENSGALG00000047784					ENSGALG00000048133
ENSGALG00000052294	ENSGALG00000054731	ENSGALG00000049715					ENSGALG00000025484
ENSGALG00000023763	ENSGALG00000048270	ENSGALG00000026991					ENSGALG00000053643
ENSGALG00000050737	ENSGALG00000039876	ENSGALG00000049000					ENSGALG00000047385
ENSGALG00000048708	ENSGALG00000038478	ENSGALG00000047786					ENSGALG00000047388
ENSGALG00000052086	ENSGALG00000052378	ENSGALG00000049791					ENSGALG00000052189
ENSGALG00000025379	ENSGALG00000037687	ENSGALG00000050103					ENSGALG00000052234
ENSGALG00000048779	ENSGALG00000049173	ENSGALG00000016165					ENSGALG00000051762
ENSGALG00000048988	ENSGALG00000038021						ENSGALG00000053853
ENSGALG00000048982	ENSGALG00000052231						ENSGALG00000049640
ENSGALG00000048987	ENSGALG00000048760						ENSGALG00000049170
ENSGALG00000051666	ENSGALG00000025299						ENSGALG00000052102
ENSGALG00000049580	ENSGALG00000050928						ENSGALG00000048768
ENSGALG00000049585	ENSGALG00000046837						ENSGALG00000055043
ENSGALG00000047039	ENSGALG00000014650						ENSGALG00000054410
ENSGALG00000047034	ENSGALG00000046961						ENSGALG00000048684
ENSGALG00000052664	ENSGALG00000039005						ENSGALG00000048535
ENSGALG00000028701	ENSGALG00000021025						ENSGALG00000027034
ENSGALG00000054848	ENSGALG00000051446						ENSGALG00000011022
ENSGALG00000037363	ENSGALG00000055098						ENSGALG00000051333
ENSGALG00000001431	ENSGALG00000029125						ENSGALG00000052528
ENSGALG00000047378	ENSGALG00000051541						ENSGALG00000048803
ENSGALG00000049814	ENSGALG00000025198						ENSGALG00000048472
ENSGALG00000048827	ENSGALG00000047396						ENSGALG00000052721
ENSGALG00000055048	ENSGALG00000047391						ENSGALG00000050768
ENSGALG00000038767	ENSGALG00000050300						ENSGALG00000047932
ENSGALG00000050113	ENSGALG00000006329						ENSGALG00000042881
ENSGALG00000054671	ENSGALG00000037220						ENSGALG00000025645
ENSGALG00000054672	ENSGALG00000036204						ENSGALG00000049523
ENSGALG00000047171	ENSGALG00000048221						ENSGALG00000050517
ENSGALG00000047175	ENSGALG00000048368						ENSGALG00000046980
ENSGALG00000053333	ENSGALG00000025250						ENSGALG00000053573
ENSGALG00000051295	ENSGALG00000053118						ENSGALG00000054360
ENSGALG00000005766	ENSGALG00000052443						ENSGALG00000047537
ENSGALG00000044527	ENSGALG00000047226						ENSGALG00000054945
ENSGALG00000006239	ENSGALG00000047229						ENSGALG00000051891
ENSGALG00000049872	ENSGALG00000049045						ENSGALG00000040038
ENSGALG00000050945	ENSGALG00000024138						ENSGALG00000023847
ENSGALG00000050941	ENSGALG00000053433						ENSGALG00000037599
ENSGALG00000050949	ENSGALG00000049645						ENSGALG00000047779
ENSGALG00000052391	ENSGALG00000051486						ENSGALG00000029985
ENSGALG00000052393	ENSGALG00000051735						ENSGALG00000050588
ENSGALG00000052397	ENSGALG00000018312						ENSGALG00000053636
ENSGALG00000054925	ENSGALG00000053269						ENSGALG00000000892
ENSGALG00000040811	ENSGALG00000047912						ENSGALG00000052176
ENSGALG00000052970	ENSGALG00000029454						ENSGALG00000051738
ENSGALG00000047457	ENSGALG00000004163						ENSGALG00000049418
ENSGALG00000048662	ENSGALG00000029423						ENSGALG00000049592
ENSGALG00000031709	ENSGALG00000025192						ENSGALG00000049595
ENSGALG00000048591	ENSGALG00000025175						ENSGALG00000049620
ENSGALG00000053089	ENSGALG00000016020						ENSGALG00000054091
ENSGALG00000025782	ENSGALG00000028374						ENSGALG00000051304
ENSGALG00000051035	ENSGALG00000053169						ENSGALG00000053709
ENSGALG00000014904	ENSGALG00000045985						ENSGALG00000052940
ENSGALG00000051934	ENSGALG00000048944						ENSGALG00000050066
ENSGALG00000055030	ENSGALG00000048157						ENSGALG00000054016
ENSGALG00000054346	ENSGALG00000027219						ENSGALG00000046809
ENSGALG00000003512	ENSGALG00000050080						ENSGALG00000036828
ENSGALG00000051455	ENSGALG00000045087						ENSGALG00000052496
ENSGALG00000054186	ENSGALG00000049110						ENSGALG00000049904
ENSGALG00000053327	ENSGALG00000038919						ENSGALG00000046690
ENSGALG00000053323	ENSGALG00000041572						ENSGALG00000047700
ENSGALG00000053842	ENSGALG00000051841						ENSGALG00000051537
ENSGALG00000052747	ENSGALG00000051898						ENSGALG00000054111
ENSGALG00000028621	ENSGALG00000054666						ENSGALG00000025442
ENSGALG00000037758	ENSGALG00000054267						ENSGALG00000050827
ENSGALG00000048201	ENSGALG00000047413						ENSGALG00000051607
ENSGALG00000008562	ENSGALG00000049670						ENSGALG00000001900
ENSGALG00000027494	ENSGALG00000050375						ENSGALG00000054704
ENSGALG00000053797	ENSGALG00000018882						ENSGALG00000053166
ENSGALG00000025298	ENSGALG00000049788						ENSGALG00000052419
ENSGALG00000052461	ENSGALG00000004820						ENSGALG00000048942
ENSGALG00000047726	ENSGALG00000031850						ENSGALG00000002413
ENSGALG00000047728	ENSGALG00000047330						ENSGALG00000054574
ENSGALG00000008602	ENSGALG00000040641						ENSGALG00000047815
ENSGALG00000026392	ENSGALG00000041688						ENSGALG00000052447
ENSGALG00000005400	ENSGALG00000053361						ENSGALG00000052124
ENSGALG00000005404	ENSGALG00000048398						ENSGALG00000051471
ENSGALG00000049931	ENSGALG00000046999						ENSGALG00000050784
ENSGALG00000028183	ENSGALG00000050055						ENSGALG00000050783
ENSGALG00000045520	ENSGALG00000025582						ENSGALG00000050238
ENSGALG00000046682	ENSGALG00000050321						ENSGALG00000050903
ENSGALG00000047081	ENSGALG00000053289						ENSGALG00000046760
ENSGALG00000026751	ENSGALG00000051191						ENSGALG00000049671
ENSGALG00000054101	ENSGALG00000048006						ENSGALG00000050574
ENSGALG00000051311	ENSGALG00000048004						ENSGALG00000042690
ENSGALG00000050836	ENSGALG00000053021						ENSGALG00000047078
ENSGALG00000052159	ENSGALG00000024676						ENSGALG00000050295
ENSGALG00000049435	ENSGALG00000052776						ENSGALG00000055074
ENSGALG00000030087	ENSGALG00000025248						ENSGALG00000055076
ENSGALG00000009033	ENSGALG00000054386						ENSGALG00000050000
ENSGALG00000025459	ENSGALG00000050630						ENSGALG00000034564
ENSGALG00000053174	ENSGALG00000046887						ENSGALG00000034697
ENSGALG00000051158	ENSGALG00000047971						ENSGALG00000047334
ENSGALG00000055100	ENSGALG00000025244						ENSGALG00000027103
ENSGALG00000048044	ENSGALG00000033392						ENSGALG00000049194
ENSGALG00000048694	ENSGALG00000054020						ENSGALG00000025433
ENSGALG00000018251	ENSGALG00000050241						ENSGALG00000008874
ENSGALG00000018252	ENSGALG00000001695						ENSGALG00000047918
ENSGALG00000050673	ENSGALG00000048998						ENSGALG00000051933
ENSGALG00000046848	ENSGALG00000011616						ENSGALG00000050322
ENSGALG00000050092	ENSGALG00000051322						ENSGALG00000006454
ENSGALG00000026867	ENSGALG00000018279						ENSGALG00000026417
ENSGALG00000047742	ENSGALG00000047945						ENSGALG00000048793
ENSGALG00000012297	ENSGALG00000043056						ENSGALG00000048245
ENSGALG00000008761	ENSGALG00000053767						ENSGALG00000053937
ENSGALG00000012907	ENSGALG00000052386						ENSGALG00000018289
ENSGALG00000018262	ENSGALG00000040115						ENSGALG00000052428
ENSGALG00000049344	ENSGALG00000011454						ENSGALG00000026201
ENSGALG00000029034	ENSGALG00000053567						ENSGALG00000044225
ENSGALG00000010173	ENSGALG00000048841						ENSGALG00000050632
ENSGALG00000033849	ENSGALG00000051900						ENSGALG00000039633
ENSGALG00000048753	ENSGALG00000054377						ENSGALG00000047659
ENSGALG00000020261	ENSGALG00000050316						ENSGALG00000049387
ENSGALG00000020049	ENSGALG00000052923						ENSGALG00000041312
ENSGALG00000050203	ENSGALG00000007172						ENSGALG00000052305
ENSGALG00000016804	ENSGALG00000025157						ENSGALG00000051655
ENSGALG00000053722	ENSGALG00000053108						ENSGALG00000047165
ENSGALG00000053723	ENSGALG00000003908						ENSGALG00000050773
ENSGALG00000053720	ENSGALG00000028802						ENSGALG00000054719
ENSGALG00000045938	ENSGALG00000049925						ENSGALG00000047940
ENSGALG00000046774	ENSGALG00000049922						ENSGALG00000047469
ENSGALG00000046771	ENSGALG00000048729						ENSGALG00000053890
ENSGALG00000046770	ENSGALG00000050228						ENSGALG00000020193
ENSGALG00000047427	ENSGALG00000054373						ENSGALG00000047466
ENSGALG00000025293	ENSGALG00000051122						ENSGALG00000038391
ENSGALG00000041483	ENSGALG00000050296						ENSGALG00000053569
ENSGALG00000009682	ENSGALG00000007236						ENSGALG00000030353
ENSGALG00000048962	ENSGALG00000053685						ENSGALG00000017172
ENSGALG00000054076	ENSGALG00000053684						ENSGALG00000053104
ENSGALG00000051220	ENSGALG00000048371						ENSGALG00000047753
ENSGALG00000039292	ENSGALG00000047350						ENSGALG00000043260
ENSGALG00000048688	ENSGALG00000010161						ENSGALG00000049927
ENSGALG00000052777	ENSGALG00000025410						ENSGALG00000047369
ENSGALG00000054819	ENSGALG00000028402						ENSGALG00000048483
ENSGALG00000029254	ENSGALG00000053348						ENSGALG00000053442
ENSGALG00000051949	ENSGALG00000027692						ENSGALG00000053441
ENSGALG00000055068	ENSGALG00000054423						ENSGALG00000041511
ENSGALG00000055062	ENSGALG00000053531						ENSGALG00000025350
ENSGALG00000053593	ENSGALG00000052795						ENSGALG00000047256
ENSGALG00000044940	ENSGALG00000054192						ENSGALG00000048964
ENSGALG00000052028	ENSGALG00000047127						ENSGALG00000019843
ENSGALG00000031045	ENSGALG00000053001						ENSGALG00000019842
ENSGALG00000020143	ENSGALG00000055095						ENSGALG00000049330
ENSGALG00000047989	ENSGALG00000053679						ENSGALG00000046331
ENSGALG00000048447	ENSGALG00000047576						ENSGALG00000050292
ENSGALG00000048444	ENSGALG00000047435						ENSGALG00000049817
ENSGALG00000053560	ENSGALG00000048946						ENSGALG00000014228
ENSGALG00000016183	ENSGALG00000051778						ENSGALG00000048640
ENSGALG00000047129	ENSGALG00000049451						ENSGALG00000048643
ENSGALG00000050731	ENSGALG00000047911						ENSGALG00000049993
ENSGALG00000048265	ENSGALG00000051178						ENSGALG00000054007
ENSGALG00000005242	ENSGALG00000048547						ENSGALG00000048846
ENSGALG00000050794	ENSGALG00000032311						ENSGALG00000054132
ENSGALG00000046448	ENSGALG00000049365						ENSGALG00000053960
ENSGALG00000051698							ENSGALG00000046713
ENSGALG00000048248							ENSGALG00000048142
ENSGALG00000030160							ENSGALG00000051685
ENSGALG00000049963							ENSGALG00000052690
ENSGALG00000049033							ENSGALG00000052698
ENSGALG00000025485							ENSGALG00000050795
ENSGALG00000046916							ENSGALG00000026889
ENSGALG00000053869							ENSGALG00000054711
ENSGALG00000049179							ENSGALG00000052367
ENSGALG00000054337							ENSGALG00000013007
ENSGALG00000054039							ENSGALG00000025221
ENSGALG00000048284							ENSGALG00000048545
ENSGALG00000048455							ENSGALG00000047068
ENSGALG00000044997							ENSGALG00000047806
ENSGALG00000003013							ENSGALG00000051513
ENSGALG00000013912							ENSGALG00000052132
ENSGALG00000054135							ENSGALG00000048191
ENSGALG00000018314
ENSGALG00000047760
ENSGALG00000047987
ENSGALG00000052187
ENSGALG00000052230
ENSGALG00000051769
ENSGALG00000049449
ENSGALG00000042443
ENSGALG00000032125
ENSGALG00000025889
ENSGALG00000051306
ENSGALG00000039750
ENSGALG00000030596
ENSGALG00000049909
ENSGALG00000049744
ENSGALG00000049237
ENSGALG00000051168
ENSGALG00000053956
ENSGALG00000017790
ENSGALG00000048076
ENSGALG00000048079
ENSGALG00000035595
ENSGALG00000047216
ENSGALG00000042669
ENSGALG00000025252
ENSGALG00000047580
ENSGALG00000047586
ENSGALG00000055017
ENSGALG00000047916
ENSGALG00000047873
ENSGALG00000049178
ENSGALG00000011052
ENSGALG00000050889
ENSGALG00000051620
ENSGALG00000051584
ENSGALG00000054491
ENSGALG00000049377
ENSGALG00000035925
ENSGALG00000053602
ENSGALG00000048762
ENSGALG00000016296
ENSGALG00000054768
ENSGALG00000053239
ENSGALG00000053110
ENSGALG00000019736
ENSGALG00000054201
ENSGALG00000051648
ENSGALG00000026037
ENSGALG00000054861
ENSGALG00000046839
ENSGALG00000046338
ENSGALG00000027129
ENSGALG00000045023
ENSGALG00000052115
ENSGALG00000050224
ENSGALG00000027673
ENSGALG00000047318
ENSGALG00000030676
ENSGALG00000048806
ENSGALG00000049042
ENSGALG00000054654
ENSGALG00000050767
ENSGALG00000052847
ENSGALG00000051555
ENSGALG00000006131
ENSGALG00000016858
ENSGALG00000042621
ENSGALG00000052914
ENSGALG00000052911
ENSGALG00000049525
ENSGALG00000026117
ENSGALG00000026118
ENSGALG00000016523
ENSGALG00000051911
ENSGALG00000026305
ENSGALG00000031791
ENSGALG00000048872
ENSGALG00000048250
ENSGALG00000012623
ENSGALG00000047367
ENSGALG00000053158
ENSGALG00000040425
ENSGALG00000040392
ENSGALG00000042372
ENSGALG00000044073
ENSGALG00000053809
ENSGALG00000049371
ENSGALG00000051110
ENSGALG00000025535
ENSGALG00000053117
ENSGALG00000047748
ENSGALG00000052996
ENSGALG00000052995
ENSGALG00000021774
ENSGALG00000036455
ENSGALG00000019361
ENSGALG00000053771
ENSGALG00000033093
ENSGALG00000049200
ENSGALG00000011322
ENSGALG00000050384
ENSGALG00000050105
ENSGALG00000047568
ENSGALG00000010864
ENSGALG00000053439
ENSGALG00000053386
ENSGALG00000050146
ENSGALG00000050144
ENSGALG00000044817
ENSGALG00000044263
ENSGALG00000034086
ENSGALG00000028325
ENSGALG00000052823
ENSGALG00000051732
ENSGALG00000049410
ENSGALG00000037064
ENSGALG00000038763
ENSGALG00000050268
ENSGALG00000050262
ENSGALG00000006662
ENSGALG00000049643
ENSGALG00000048500
ENSGALG00000002428
ENSGALG00000054098
ENSGALG00000054548
ENSGALG00000053017
ENSGALG00000039246
ENSGALG00000052654
ENSGALG00000052657
ENSGALG00000050657
ENSGALG00000050828
ENSGALG00000014668
ENSGALG00000005504
ENSGALG00000049518
ENSGALG00000053953
ENSGALG00000014726
ENSGALG00000049323
ENSGALG00000049864
ENSGALG00000053267
ENSGALG00000054254
ENSGALG00000035565
ENSGALG00000046792
ENSGALG00000052942
ENSGALG00000049513
ENSGALG00000044491
ENSGALG00000046997
ENSGALG00000054010
ENSGALG00000051121
ENSGALG00000048495
ENSGALG00000051981
ENSGALG00000053544
ENSGALG00000017347
ENSGALG00000053099
ENSGALG00000053096
ENSGALG00000048593
ENSGALG00000025458
ENSGALG00000049944
ENSGALG00000054190
ENSGALG00000053970
ENSGALG00000051223
ENSGALG00000000568
ENSGALG00000054707
ENSGALG00000041074
ENSGALG00000026467
ENSGALG00000049281
ENSGALG00000049198
ENSGALG00000030834
ENSGALG00000038138
ENSGALG00000035494
ENSGALG00000025344
ENSGALG00000054788
ENSGALG00000054436
ENSGALG00000053785
ENSGALG00000052490
ENSGALG00000017216
ENSGALG00000050976
ENSGALG00000004260
ENSGALG00000004280
ENSGALG00000049987
ENSGALG00000053665
ENSGALG00000046699
ENSGALG00000046695
ENSGALG00000046696
ENSGALG00000049258
ENSGALG00000045936
ENSGALG00000050371
ENSGALG00000044875
ENSGALG00000033381
ENSGALG00000002200
ENSGALG00000005402
ENSGALG00000050175
ENSGALG00000051613
ENSGALG00000053570
ENSGALG00000050825
ENSGALG00000048292
ENSGALG00000053161
ENSGALG00000052090
ENSGALG00000051140
ENSGALG00000006693
ENSGALG00000055131
ENSGALG00000055138
ENSGALG00000047272
ENSGALG00000048947
ENSGALG00000048943
ENSGALG00000046859
ENSGALG00000050087
ENSGALG00000036500
ENSGALG00000051843
ENSGALG00000050272
ENSGALG00000052788
ENSGALG00000051784
ENSGALG00000049354
ENSGALG00000052875
ENSGALG00000050786
ENSGALG00000021788
ENSGALG00000048743
ENSGALG00000002848
ENSGALG00000051490
ENSGALG00000025295
ENSGALG00000050908
ENSGALG00000054268
ENSGALG00000054265
ENSGALG00000046761
ENSGALG00000015332
ENSGALG00000006044
ENSGALG00000055060
ENSGALG00000051973
ENSGALG00000055071
ENSGALG00000006031
ENSGALG00000052121
ENSGALG00000054432
ENSGALG00000036587
ENSGALG00000048319
ENSGALG00000047336
ENSGALG00000043689
ENSGALG00000048456
ENSGALG00000053949
ENSGALG00000054639
ENSGALG00000054633
ENSGALG00000048589
ENSGALG00000047132
ENSGALG00000050705
ENSGALG00000050703
ENSGALG00000037678
ENSGALG00000019290
ENSGALG00000049975
ENSGALG00000049020
ENSGALG00000047497
ENSGALG00000054199
ENSGALG00000049897
ENSGALG00000053796
ENSGALG00000051096
ENSGALG00000054142
ENSGALG00000048848
ENSGALG00000054927
ENSGALG00000025220
ENSGALG00000051254
ENSGALG00000050122
ENSGALG00000047707
ENSGALG00000052194
ENSGALG00000030765
ENSGALG00000052225
ENSGALG00000048792
ENSGALG00000054905
ENSGALG00000053282
ENSGALG00000013226
ENSGALG00000013265
ENSGALG00000044447
ENSGALG00000034962
ENSGALG00000031010
ENSGALG00000011792
ENSGALG00000048913
ENSGALG00000054382
ENSGALG00000054520
ENSGALG00000044223
ENSGALG00000051543
ENSGALG00000047045
ENSGALG00000046886
ENSGALG00000046883
ENSGALG00000007656
ENSGALG00000015753
ENSGALG00000028629
ENSGALG00000052113
ENSGALG00000011262
ENSGALG00000019756
ENSGALG00000048717
ENSGALG00000004472
ENSGALG00000035867
ENSGALG00000051996
ENSGALG00000053200
ENSGALG00000031974
ENSGALG00000054239
ENSGALG00000047286
ENSGALG00000048995
ENSGALG00000049646
ENSGALG00000049642
ENSGALG00000008908
ENSGALG00000015595
ENSGALG00000054855
ENSGALG00000046803
ENSGALG00000052206
ENSGALG00000048813
ENSGALG00000048974
ENSGALG00000018322
ENSGALG00000054642
ENSGALG00000053913
ENSGALG00000051427
ENSGALG00000051423
ENSGALG00000049302
ENSGALG00000050776
ENSGALG00000053157
ENSGALG00000013484
ENSGALG00000021952
ENSGALG00000040805
ENSGALG00000052963
ENSGALG00000055022
ENSGALG00000054375
ENSGALG00000006072
ENSGALG00000052841
ENSGALG00000048890
ENSGALG00000048891
ENSGALG00000049765
ENSGALG00000049760
ENSGALG00000048402
ENSGALG00000026969
ENSGALG00000054175
ENSGALG00000051886
ENSGALG00000052279
ENSGALG00000052277
ENSGALG00000028596
ENSGALG00000050304
ENSGALG00000048235
ENSGALG00000040716
ENSGALG00000053819
ENSGALG00000053816
ENSGALG00000052472
ENSGALG00000052477
ENSGALG00000048037
ENSGALG00000035432
ENSGALG00000008434
ENSGALG00000017936
ENSGALG00000053605
ENSGALG00000047099
ENSGALG00000047549
ENSGALG00000050398
ENSGALG00000050396
ENSGALG00000048484
ENSGALG00000033622
ENSGALG00000053447
ENSGALG00000040536
ENSGALG00000025522
ENSGALG00000052147
ENSGALG00000051493
ENSGALG00000051721
ENSGALG00000049407
ENSGALG00000050898
ENSGALG00000053826
ENSGALG00000053188
ENSGALG00000053181
ENSGALG00000055113
ENSGALG00000046700
ENSGALG00000025216
ENSGALG00000048967
ENSGALG00000052068
ENSGALG00000048573
ENSGALG00000046878
ENSGALG00000046870
ENSGALG00000046871
ENSGALG00000054597
ENSGALG00000034580
ENSGALG00000014188
ENSGALG00000031651
ENSGALG00000047281
ENSGALG00000047995
ENSGALG00000053271
ENSGALG00000050219
ENSGALG00000050968
ENSGALG00000046783
ENSGALG00000052958
ENSGALG00000051608
ENSGALG00000049999
ENSGALG00000023934
ENSGALG00000053142
ENSGALG00000054820
ENSGALG00000051374
ENSGALG00000055011
ENSGALG00000036075
ENSGALG00000046083
ENSGALG00000047529
ENSGALG00000051030
ENSGALG00000054136
ENSGALG00000048434
ENSGALG00000048431
ENSGALG00000047110
ENSGALG00000052417
ENSGALG00000048149
ENSGALG00000013123
ENSGALG00000009958
ENSGALG00000052583
ENSGALG00000027522
ENSGALG00000051682
ENSGALG00000047701
ENSGALG00000052489
ENSGALG00000045414
ENSGALG00000007814
ENSGALG00000047689
ENSGALG00000052960
ENSGALG00000052691
ENSGALG00000047575
ENSGALG00000049240
ENSGALG00000049247
ENSGALG00000049244
ENSGALG00000049795
ENSGALG00000053280
ENSGALG00000053475
ENSGALG00000054902
ENSGALG00000014136
ENSGALG00000050106
ENSGALG00000050109
ENSGALG00000050792
ENSGALG00000042846
ENSGALG00000053082
ENSGALG00000028360
ENSGALG00000051772
ENSGALG00000049453
ENSGALG00000049456
ENSGALG00000025613
ENSGALG00000051189
ENSGALG00000021908
ENSGALG00000053845
ENSGALG00000053150
ENSGALG00000052403
ENSGALG00000051170
ENSGALG00000055015
ENSGALG00000048060
ENSGALG00000027071
ENSGALG00000046873
ENSGALG00000051932
ENSGALG00000025226
ENSGALG00000036292
ENSGALG00000050644
ENSGALG00000034761
ENSGALG00000047064
ENSGALG00000040045
ENSGALG00000047091
ENSGALG00000047804
ENSGALG00000051514
ENSGALG00000036511
ENSGALG00000038966
ENSGALG00000047546
ENSGALG00000054984
ENSGALG00000051851
ENSGALG00000049367
ENSGALG00000052861
ENSGALG00000045282
ENSGALG00000048770
ENSGALG00000025381

## Sheet: Table S5
Table S5. AF_stage_specificially_expressed_gene_list
D7	D21	D56	D98	D140	D180
ENSGALG00000052007	ENSGALG00000054211	ENSGALG00000032958	ENSGALG00000053579	ENSGALG00000050911	ENSGALG00000046758
ENSGALG00000054218	ENSGALG00000054872	ENSGALG00000048870	ENSGALG00000051523	ENSGALG00000052518	ENSGALG00000047942
ENSGALG00000047400	ENSGALG00000055041	ENSGALG00000053090	ENSGALG00000048783	ENSGALG00000047401	ENSGALG00000040416
ENSGALG00000047405	ENSGALG00000042584	ENSGALG00000047507	ENSGALG00000051181	ENSGALG00000041938	ENSGALG00000051261
ENSGALG00000051637	ENSGALG00000048111	ENSGALG00000054291	ENSGALG00000046912	ENSGALG00000050450	ENSGALG00000048598
ENSGALG00000051633	ENSGALG00000003425	ENSGALG00000047485	ENSGALG00000030516	ENSGALG00000051166	ENSGALG00000053127
ENSGALG00000054823	ENSGALG00000027519	ENSGALG00000034694	ENSGALG00000015068	ENSGALG00000053056	ENSGALG00000033419
ENSGALG00000041028	ENSGALG00000052909	ENSGALG00000043860	ENSGALG00000052169	ENSGALG00000054875	ENSGALG00000053983
ENSGALG00000053588	ENSGALG00000008802	ENSGALG00000053298	ENSGALG00000047484	ENSGALG00000054860	ENSGALG00000014793
ENSGALG00000054584	ENSGALG00000045823	ENSGALG00000050589	ENSGALG00000048663	ENSGALG00000048301	ENSGALG00000053245
ENSGALG00000046824	ENSGALG00000021353	ENSGALG00000030997	ENSGALG00000054029	ENSGALG00000052555	ENSGALG00000050670
ENSGALG00000047888	ENSGALG00000024024	ENSGALG00000054537	ENSGALG00000048417	ENSGALG00000036869	ENSGALG00000046844
ENSGALG00000034574	ENSGALG00000017906	ENSGALG00000050737	ENSGALG00000051451	ENSGALG00000048469	ENSGALG00000047823
ENSGALG00000048304	ENSGALG00000050583	ENSGALG00000053927	ENSGALG00000054182	ENSGALG00000054627	ENSGALG00000010928
ENSGALG00000047306	ENSGALG00000046917	ENSGALG00000049583	ENSGALG00000052269	ENSGALG00000052714	ENSGALG00000025293
ENSGALG00000036861	ENSGALG00000039105	ENSGALG00000039224	ENSGALG00000041143	ENSGALG00000050710	ENSGALG00000051942
ENSGALG00000052931	ENSGALG00000025279	ENSGALG00000026089	ENSGALG00000054441	ENSGALG00000047922	ENSGALG00000025699
ENSGALG00000054628	ENSGALG00000033579	ENSGALG00000050746	ENSGALG00000005409	ENSGALG00000048119	ENSGALG00000047500
ENSGALG00000054622	ENSGALG00000046893	ENSGALG00000053710	ENSGALG00000026179	ENSGALG00000030724	ENSGALG00000033664
ENSGALG00000039187	ENSGALG00000032558	ENSGALG00000050535	ENSGALG00000046353	ENSGALG00000027468	ENSGALG00000047214
ENSGALG00000030046	ENSGALG00000050865	ENSGALG00000025312	ENSGALG00000050369	ENSGALG00000025658	ENSGALG00000050602
ENSGALG00000052718	ENSGALG00000053981	ENSGALG00000052745	ENSGALG00000006440	ENSGALG00000054290	ENSGALG00000054334
ENSGALG00000052710	ENSGALG00000048708	ENSGALG00000045873	ENSGALG00000026726	ENSGALG00000050997	ENSGALG00000049376
ENSGALG00000047928	ENSGALG00000049678	ENSGALG00000048163	ENSGALG00000050092	ENSGALG00000053740	ENSGALG00000000371
ENSGALG00000004101	ENSGALG00000046490	ENSGALG00000052858	ENSGALG00000004572	ENSGALG00000052886	ENSGALG00000016296
ENSGALG00000053114	ENSGALG00000048988	ENSGALG00000054448	ENSGALG00000049681	ENSGALG00000052901	ENSGALG00000050923
ENSGALG00000017342	ENSGALG00000049743	ENSGALG00000025298	ENSGALG00000047989	ENSGALG00000049558	ENSGALG00000046748
ENSGALG00000046990	ENSGALG00000052667	ENSGALG00000046925	ENSGALG00000048444	ENSGALG00000048638	ENSGALG00000038476
ENSGALG00000046994	ENSGALG00000054845	ENSGALG00000008602	ENSGALG00000026464	ENSGALG00000048636	ENSGALG00000054047
ENSGALG00000026901	ENSGALG00000048351	ENSGALG00000052057	ENSGALG00000051080	ENSGALG00000049948	ENSGALG00000048603
ENSGALG00000048635	ENSGALG00000047378	ENSGALG00000034308	ENSGALG00000047381	ENSGALG00000049943	ENSGALG00000026117
ENSGALG00000003224	ENSGALG00000049814	ENSGALG00000050362	ENSGALG00000049958	ENSGALG00000051217	ENSGALG00000040392
ENSGALG00000018255	ENSGALG00000025991	ENSGALG00000050280	ENSGALG00000048270	ENSGALG00000050600	ENSGALG00000025710
ENSGALG00000018254	ENSGALG00000024933	ENSGALG00000027889	ENSGALG00000048927	ENSGALG00000051408	ENSGALG00000048412
ENSGALG00000018258	ENSGALG00000051571	ENSGALG00000054312	ENSGALG00000055043	ENSGALG00000031578	ENSGALG00000048023
ENSGALG00000016557	ENSGALG00000049359	ENSGALG00000008761	ENSGALG00000054863	ENSGALG00000046652	ENSGALG00000049047
ENSGALG00000016943	ENSGALG00000049314	ENSGALG00000011413	ENSGALG00000052527	ENSGALG00000047520	ENSGALG00000053430
ENSGALG00000047527	ENSGALG00000051295	ENSGALG00000051410	ENSGALG00000047390	ENSGALG00000047522	ENSGALG00000049628
ENSGALG00000051064	ENSGALG00000054925	ENSGALG00000047329	ENSGALG00000048884	ENSGALG00000028476	ENSGALG00000051400
ENSGALG00000051060	ENSGALG00000046411	ENSGALG00000048853	ENSGALG00000048872	ENSGALG00000052671	ENSGALG00000049323
ENSGALG00000049297	ENSGALG00000054920	ENSGALG00000045388	ENSGALG00000049892	ENSGALG00000050333	ENSGALG00000049019
ENSGALG00000049742	ENSGALG00000054922	ENSGALG00000054898	ENSGALG00000021802	ENSGALG00000053312	ENSGALG00000049255
ENSGALG00000050331	ENSGALG00000047452	ENSGALG00000048455	ENSGALG00000053077	ENSGALG00000051265	ENSGALG00000025335
ENSGALG00000015928	ENSGALG00000047160	ENSGALG00000011590	ENSGALG00000051694	ENSGALG00000054050	ENSGALG00000049097
ENSGALG00000049468	ENSGALG00000055032	ENSGALG00000050809	ENSGALG00000053450	ENSGALG00000054053	ENSGALG00000052531
ENSGALG00000010977	ENSGALG00000049779	ENSGALG00000049449	ENSGALG00000045073	ENSGALG00000027424	ENSGALG00000052166
ENSGALG00000053297	ENSGALG00000032039	ENSGALG00000025374	ENSGALG00000049518	ENSGALG00000031300	ENSGALG00000016273
ENSGALG00000049552	ENSGALG00000043392	ENSGALG00000047449	ENSGALG00000048833	ENSGALG00000052520	ENSGALG00000055052
ENSGALG00000054461	ENSGALG00000048418	ENSGALG00000001311	ENSGALG00000054664	ENSGALG00000053877	ENSGALG00000052726
ENSGALG00000052982	ENSGALG00000054394	ENSGALG00000049373	ENSGALG00000035835	ENSGALG00000053292	ENSGALG00000035085
ENSGALG00000042119	ENSGALG00000046829	ENSGALG00000025299	ENSGALG00000021198	ENSGALG00000054476	ENSGALG00000051970
ENSGALG00000034197	ENSGALG00000021798	ENSGALG00000046742	ENSGALG00000052942	ENSGALG00000054478	ENSGALG00000048120
ENSGALG00000054535	ENSGALG00000052266	ENSGALG00000050675	ENSGALG00000049981	ENSGALG00000047774	ENSGALG00000047518
ENSGALG00000027256	ENSGALG00000027763	ENSGALG00000054043	ENSGALG00000051121	ENSGALG00000033415	ENSGALG00000017910
ENSGALG00000045544	ENSGALG00000046926	ENSGALG00000045026	ENSGALG00000048751	ENSGALG00000047237	ENSGALG00000018977
ENSGALG00000040582	ENSGALG00000000437	ENSGALG00000042099	ENSGALG00000051577	ENSGALG00000049055	ENSGALG00000046883
ENSGALG00000036244	ENSGALG00000052058	ENSGALG00000054283	ENSGALG00000048593	ENSGALG00000048902	ENSGALG00000053714
ENSGALG00000005672	ENSGALG00000051501	ENSGALG00000051911	ENSGALG00000054194	ENSGALG00000053258	ENSGALG00000052808
ENSGALG00000007406	ENSGALG00000048799	ENSGALG00000018281	ENSGALG00000050870	ENSGALG00000054533	ENSGALG00000014858
ENSGALG00000053984	ENSGALG00000050168	ENSGALG00000051302	ENSGALG00000053147	ENSGALG00000051574	ENSGALG00000052888
ENSGALG00000049391	ENSGALG00000050836	ENSGALG00000044630	ENSGALG00000025319	ENSGALG00000051394	ENSGALG00000051592
ENSGALG00000045736	ENSGALG00000001936	ENSGALG00000050303	ENSGALG00000046695	ENSGALG00000049150	ENSGALG00000053157
ENSGALG00000047309	ENSGALG00000051719	ENSGALG00000050620	ENSGALG00000002200	ENSGALG00000022206	ENSGALG00000053763
ENSGALG00000051405	ENSGALG00000050445	ENSGALG00000010980	ENSGALG00000031473	ENSGALG00000032554	ENSGALG00000037352
ENSGALG00000053212	ENSGALG00000050655	ENSGALG00000050592	ENSGALG00000051704	ENSGALG00000053429	ENSGALG00000053818
ENSGALG00000053961	ENSGALG00000001835	ENSGALG00000016043	ENSGALG00000025233	ENSGALG00000051808	ENSGALG00000046689
ENSGALG00000048980	ENSGALG00000040733	ENSGALG00000051819	ENSGALG00000049361	ENSGALG00000051805	ENSGALG00000048039
ENSGALG00000048985	ENSGALG00000048955	ENSGALG00000051486	ENSGALG00000051475	ENSGALG00000051804	ENSGALG00000018336
ENSGALG00000051667	ENSGALG00000049604	ENSGALG00000051481	ENSGALG00000051785	ENSGALG00000048993	ENSGALG00000048726
ENSGALG00000049631	ENSGALG00000005928	ENSGALG00000038763	ENSGALG00000050904	ENSGALG00000053988	ENSGALG00000053684
ENSGALG00000049630	ENSGALG00000052951	ENSGALG00000025476	ENSGALG00000025526	ENSGALG00000053989	ENSGALG00000016138
ENSGALG00000049635	ENSGALG00000028382	ENSGALG00000052324	ENSGALG00000019290	ENSGALG00000051390	ENSGALG00000016699
ENSGALG00000048357	ENSGALG00000029034	ENSGALG00000051679	ENSGALG00000026712	ENSGALG00000052294	ENSGALG00000052561
ENSGALG00000052507	ENSGALG00000010173	ENSGALG00000041392	ENSGALG00000006552	ENSGALG00000031713	ENSGALG00000048847
ENSGALG00000052508	ENSGALG00000048756	ENSGALG00000047022	ENSGALG00000046845	ENSGALG00000052086	ENSGALG00000053341
ENSGALG00000048825	ENSGALG00000048755	ENSGALG00000015730	ENSGALG00000027586	ENSGALG00000047302	ENSGALG00000052705
ENSGALG00000045317	ENSGALG00000016804	ENSGALG00000051403	ENSGALG00000054480	ENSGALG00000027044	ENSGALG00000050104
ENSGALG00000050113	ENSGALG00000047799	ENSGALG00000049764	ENSGALG00000021777	ENSGALG00000053216	ENSGALG00000052365
ENSGALG00000053902	ENSGALG00000025291	ENSGALG00000044330	ENSGALG00000044760	ENSGALG00000053214	ENSGALG00000048541
ENSGALG00000053903	ENSGALG00000025553	ENSGALG00000053801	ENSGALG00000021856	ENSGALG00000051108	ENSGALG00000038966
ENSGALG00000047173	ENSGALG00000048655	ENSGALG00000046792	ENSGALG00000053034	ENSGALG00000050279
ENSGALG00000001273	ENSGALG00000055068	ENSGALG00000049513	ENSGALG00000053076	ENSGALG00000050276
ENSGALG00000051294	ENSGALG00000049184	ENSGALG00000003814	ENSGALG00000054239	ENSGALG00000053003
ENSGALG00000050744	ENSGALG00000049188	ENSGALG00000048452	ENSGALG00000050818	ENSGALG00000029252
ENSGALG00000012869	ENSGALG00000049939	ENSGALG00000026923	ENSGALG00000054852	ENSGALG00000052664
ENSGALG00000053715	ENSGALG00000052033	ENSGALG00000008275	ENSGALG00000047364	ENSGALG00000051310
ENSGALG00000052398	ENSGALG00000054232	ENSGALG00000049944	ENSGALG00000013484	ENSGALG00000048353
ENSGALG00000052391	ENSGALG00000020458	ENSGALG00000042150	ENSGALG00000047465	ENSGALG00000054740
ENSGALG00000052393	ENSGALG00000053069	ENSGALG00000050976	ENSGALG00000048897	ENSGALG00000051540
ENSGALG00000052395	ENSGALG00000025485	ENSGALG00000053195	ENSGALG00000013294	ENSGALG00000053906
ENSGALG00000047456	ENSGALG00000016577	ENSGALG00000035943	ENSGALG00000054551	ENSGALG00000054093
ENSGALG00000049501	ENSGALG00000052060	ENSGALG00000025500	ENSGALG00000047835	ENSGALG00000027356
ENSGALG00000048592	ENSGALG00000052681	ENSGALG00000052411	ENSGALG00000051608	ENSGALG00000051439
ENSGALG00000053556	ENSGALG00000036222	ENSGALG00000055131	ENSGALG00000051377	ENSGALG00000037094
ENSGALG00000049060	ENSGALG00000053480	ENSGALG00000048058	ENSGALG00000055011	ENSGALG00000051298
ENSGALG00000008263	ENSGALG00000032125	ENSGALG00000048943	ENSGALG00000050347	ENSGALG00000050748
ENSGALG00000051938	ENSGALG00000025888	ENSGALG00000048554	ENSGALG00000054903	ENSGALG00000005766
ENSGALG00000055033	ENSGALG00000048269	ENSGALG00000034240	ENSGALG00000050108	ENSGALG00000032696
ENSGALG00000050048	ENSGALG00000036484	ENSGALG00000053591	ENSGALG00000048544	ENSGALG00000050941
ENSGALG00000054343	ENSGALG00000035595	ENSGALG00000028950	ENSGALG00000048772	ENSGALG00000047457
ENSGALG00000037878	ENSGALG00000043914	ENSGALG00000047158		ENSGALG00000049509
ENSGALG00000050724	ENSGALG00000052378	ENSGALG00000050985		ENSGALG00000050531
ENSGALG00000049776	ENSGALG00000049238	ENSGALG00000054401		ENSGALG00000048664
ENSGALG00000049415	ENSGALG00000035393	ENSGALG00000038454		ENSGALG00000048669
ENSGALG00000037242	ENSGALG00000045889	ENSGALG00000044343		ENSGALG00000048591
ENSGALG00000051073	ENSGALG00000052814	ENSGALG00000050323		ENSGALG00000054022
ENSGALG00000027494	ENSGALG00000007004	ENSGALG00000052013		ENSGALG00000023179
ENSGALG00000053993	ENSGALG00000051434	ENSGALG00000048792		ENSGALG00000053087
ENSGALG00000052465	ENSGALG00000011447	ENSGALG00000013226		ENSGALG00000015434
ENSGALG00000005400	ENSGALG00000035131	ENSGALG00000035914		ENSGALG00000014904
ENSGALG00000053482	ENSGALG00000054040	ENSGALG00000047658		ENSGALG00000050040
ENSGALG00000049931	ENSGALG00000045023	ENSGALG00000053202		ENSGALG00000054341
ENSGALG00000021734	ENSGALG00000047061	ENSGALG00000008908		ENSGALG00000007319
ENSGALG00000026176	ENSGALG00000048801	ENSGALG00000013154		ENSGALG00000052582
ENSGALG00000053618	ENSGALG00000045825	ENSGALG00000014218		ENSGALG00000052587
ENSGALG00000053619	ENSGALG00000016678	ENSGALG00000053892		ENSGALG00000051581
ENSGALG00000050363	ENSGALG00000006423	ENSGALG00000053029		ENSGALG00000051057
ENSGALG00000048247	ENSGALG00000053777	ENSGALG00000020193		ENSGALG00000039979
ENSGALG00000050839	ENSGALG00000050510	ENSGALG00000054957		ENSGALG00000048416
ENSGALG00000009033	ENSGALG00000035650	ENSGALG00000047096		ENSGALG00000048166
ENSGALG00000009032	ENSGALG00000018245	ENSGALG00000050156		ENSGALG00000052264
ENSGALG00000025459	ENSGALG00000023195	ENSGALG00000050453		ENSGALG00000026453
ENSGALG00000023444	ENSGALG00000000038	ENSGALG00000049895		ENSGALG00000040959
ENSGALG00000033541	ENSGALG00000049089	ENSGALG00000039411		ENSGALG00000052852
ENSGALG00000010486	ENSGALG00000047394	ENSGALG00000005862		ENSGALG00000025834
ENSGALG00000048045	ENSGALG00000052035	ENSGALG00000019843		ENSGALG00000053791
ENSGALG00000048959	ENSGALG00000050306	ENSGALG00000053023		ENSGALG00000053790
ENSGALG00000018305	ENSGALG00000053055	ENSGALG00000050646		ENSGALG00000053795
ENSGALG00000018306	ENSGALG00000038645	ENSGALG00000043735		ENSGALG00000050733
ENSGALG00000050094	ENSGALG00000002303	ENSGALG00000035027		ENSGALG00000015172
ENSGALG00000005995	ENSGALG00000048229	ENSGALG00000018268		ENSGALG00000051507
ENSGALG00000004146	ENSGALG00000025164	ENSGALG00000034983		ENSGALG00000047081
ENSGALG00000047106	ENSGALG00000052440	ENSGALG00000054827		ENSGALG00000048499
ENSGALG00000052237	ENSGALG00000052443	ENSGALG00000053146		ENSGALG00000033638
ENSGALG00000018262	ENSGALG00000026964	ENSGALG00000050180		ENSGALG00000054107
ENSGALG00000051465	ENSGALG00000047228	ENSGALG00000013123		ENSGALG00000050161
ENSGALG00000038254	ENSGALG00000052456	ENSGALG00000025491		ENSGALG00000050160
ENSGALG00000053723	ENSGALG00000025154	ENSGALG00000018332		ENSGALG00000010711
ENSGALG00000047428	ENSGALG00000041661	ENSGALG00000016913		ENSGALG00000050837
ENSGALG00000050561	ENSGALG00000050461	ENSGALG00000030684		ENSGALG00000051710
ENSGALG00000051604	ENSGALG00000051137	ENSGALG00000054902		ENSGALG00000050443
ENSGALG00000048962	ENSGALG00000034474	ENSGALG00000034587		ENSGALG00000054737
ENSGALG00000054078	ENSGALG00000051233	ENSGALG00000051178		ENSGALG00000053171
ENSGALG00000048688	ENSGALG00000052657	ENSGALG00000052363		ENSGALG00000048804
ENSGALG00000054818	ENSGALG00000018312	ENSGALG00000052364		ENSGALG00000050286
ENSGALG00000051945	ENSGALG00000049128	ENSGALG00000055077		ENSGALG00000048040
ENSGALG00000025153	ENSGALG00000047185	ENSGALG00000039312		ENSGALG00000052346
ENSGALG00000030875	ENSGALG00000047189	ENSGALG00000051513		ENSGALG00000052345
ENSGALG00000053560	ENSGALG00000046831	ENSGALG00000009787		ENSGALG00000049606
ENSGALG00000054595	ENSGALG00000051909	ENSGALG00000028054		ENSGALG00000039151
ENSGALG00000027333	ENSGALG00000054010	ENSGALG00000047725		ENSGALG00000048566
ENSGALG00000025367	ENSGALG00000046800	ENSGALG00000025385		ENSGALG00000048568
ENSGALG00000043106	ENSGALG00000053141	ENSGALG00000053884		ENSGALG00000053030
ENSGALG00000048699	ENSGALG00000054350			ENSGALG00000033639
ENSGALG00000049572	ENSGALG00000032712			ENSGALG00000047004
ENSGALG00000049963	ENSGALG00000052598			ENSGALG00000050672
ENSGALG00000049968	ENSGALG00000054973			ENSGALG00000047820
ENSGALG00000013097	ENSGALG00000045249			ENSGALG00000047822
ENSGALG00000054897	ENSGALG00000048214			ENSGALG00000048364
ENSGALG00000054039	ENSGALG00000050907			ENSGALG00000049104
ENSGALG00000003013	ENSGALG00000049012			ENSGALG00000051873
ENSGALG00000003193	ENSGALG00000016859			ENSGALG00000050855
ENSGALG00000049637	ENSGALG00000053665			ENSGALG00000049340
ENSGALG00000029526	ENSGALG00000046699			ENSGALG00000047616
ENSGALG00000047760	ENSGALG00000038579			ENSGALG00000035857
ENSGALG00000052188	ENSGALG00000053465			ENSGALG00000027779
ENSGALG00000051760	ENSGALG00000053466			ENSGALG00000029631
ENSGALG00000051763	ENSGALG00000027663			ENSGALG00000046773
ENSGALG00000017052	ENSGALG00000028374			ENSGALG00000047421
ENSGALG00000025889	ENSGALG00000019941			ENSGALG00000001122
ENSGALG00000054494	ENSGALG00000052415			ENSGALG00000048659
ENSGALG00000040223	ENSGALG00000055134			ENSGALG00000051389
ENSGALG00000005361	ENSGALG00000048057			ENSGALG00000054814
ENSGALG00000048076	ENSGALG00000050272			ENSGALG00000051369
ENSGALG00000053460	ENSGALG00000047607			ENSGALG00000051360
ENSGALG00000053713	ENSGALG00000048743			ENSGALG00000055063
ENSGALG00000051319	ENSGALG00000023897			ENSGALG00000055064
ENSGALG00000051990	ENSGALG00000018503			ENSGALG00000044942
ENSGALG00000005661	ENSGALG00000054064			ENSGALG00000052572
ENSGALG00000047873	ENSGALG00000052540			ENSGALG00000049187
ENSGALG00000051826	ENSGALG00000025433			ENSGALG00000048999
ENSGALG00000052444	ENSGALG00000043096			ENSGALG00000043575
ENSGALG00000009482	ENSGALG00000048406			ENSGALG00000052855
ENSGALG00000052100	ENSGALG00000054404			ENSGALG00000048446
ENSGALG00000046281	ENSGALG00000047497			ENSGALG00000053372
ENSGALG00000047624	ENSGALG00000050610			ENSGALG00000042165
ENSGALG00000051453	ENSGALG00000046392			ENSGALG00000053394
ENSGALG00000052812	ENSGALG00000053496			ENSGALG00000014762
ENSGALG00000020292	ENSGALG00000053498			ENSGALG00000050190
ENSGALG00000032718	ENSGALG00000052229			ENSGALG00000047900
ENSGALG00000019736	ENSGALG00000051758			ENSGALG00000054414
ENSGALG00000050922	ENSGALG00000048896			ENSGALG00000054419
ENSGALG00000046745	ENSGALG00000025207			ENSGALG00000051691
ENSGALG00000001156	ENSGALG00000048798			ENSGALG00000052922
ENSGALG00000009349	ENSGALG00000051498			ENSGALG00000050078
ENSGALG00000020486	ENSGALG00000015261			ENSGALG00000049033
ENSGALG00000010198	ENSGALG00000021778			ENSGALG00000049036
ENSGALG00000052115	ENSGALG00000049357			ENSGALG00000047075
ENSGALG00000052119	ENSGALG00000054386			ENSGALG00000053232
ENSGALG00000030676	ENSGALG00000054383			ENSGALG00000052170
ENSGALG00000036852	ENSGALG00000046886			ENSGALG00000054337
ENSGALG00000054585	ENSGALG00000047862			ENSGALG00000054338
ENSGALG00000046204	ENSGALG00000033392			ENSGALG00000053643
ENSGALG00000003839	ENSGALG00000024502			ENSGALG00000053646
ENSGALG00000045792	ENSGALG00000051114			ENSGALG00000050682
ENSGALG00000047934	ENSGALG00000051112			ENSGALG00000050358
ENSGALG00000052314	ENSGALG00000052305			ENSGALG00000049539
ENSGALG00000055098	ENSGALG00000045111			ENSGALG00000029227
ENSGALG00000054826	ENSGALG00000050056			ENSGALG00000054135
ENSGALG00000050559	ENSGALG00000048696			ENSGALG00000054680
ENSGALG00000051910	ENSGALG00000054857			ENSGALG00000053481
ENSGALG00000047539	ENSGALG00000027319			ENSGALG00000053488
ENSGALG00000051077	ENSGALG00000048324			ENSGALG00000054916
ENSGALG00000051079	ENSGALG00000052535			ENSGALG00000018314
ENSGALG00000049756	ENSGALG00000051421			ENSGALG00000047983
ENSGALG00000050301	ENSGALG00000047944			ENSGALG00000050808
ENSGALG00000053308	ENSGALG00000049844			ENSGALG00000052189
ENSGALG00000000115	ENSGALG00000045194			ENSGALG00000052236
ENSGALG00000051092	ENSGALG00000001141			ENSGALG00000052234
ENSGALG00000043476	ENSGALG00000025735			ENSGALG00000051659
ENSGALG00000055123	ENSGALG00000052921			ENSGALG00000048278
ENSGALG00000042439	ENSGALG00000053414			ENSGALG00000053850
ENSGALG00000053807	ENSGALG00000037581			ENSGALG00000053851
ENSGALG00000049371	ENSGALG00000045847			ENSGALG00000053853
ENSGALG00000047308	ENSGALG00000018324			ENSGALG00000053855
ENSGALG00000052441	ENSGALG00000050304			ENSGALG00000053856
ENSGALG00000050591	ENSGALG00000039159			ENSGALG00000054706
ENSGALG00000046906	ENSGALG00000048235			ENSGALG00000025313
ENSGALG00000048020	ENSGALG00000047268			ENSGALG00000054694
ENSGALG00000049043	ENSGALG00000053813			ENSGALG00000048072
ENSGALG00000051991	ENSGALG00000048030			ENSGALG00000048071
ENSGALG00000051382	ENSGALG00000049921			ENSGALG00000048079
ENSGALG00000010057	ENSGALG00000052084			ENSGALG00000054510
ENSGALG00000047729	ENSGALG00000047098			ENSGALG00000017922
ENSGALG00000038543	ENSGALG00000040536			ENSGALG00000049175
ENSGALG00000026011	ENSGALG00000050365			ENSGALG00000049409
ENSGALG00000034325	ENSGALG00000010375			ENSGALG00000039629
ENSGALG00000050859	ENSGALG00000052149			ENSGALG00000034070
ENSGALG00000051733	ENSGALG00000051721			ENSGALG00000049377
ENSGALG00000051731	ENSGALG00000051725			ENSGALG00000052813
ENSGALG00000050165	ENSGALG00000050898			ENSGALG00000052231
ENSGALG00000010160	ENSGALG00000025685			ENSGALG00000007741
ENSGALG00000048732	ENSGALG00000015176			ENSGALG00000048768
ENSGALG00000054751	ENSGALG00000049815			ENSGALG00000025185
ENSGALG00000039403	ENSGALG00000052956			ENSGALG00000048186
ENSGALG00000002840	ENSGALG00000052954			ENSGALG00000054764
ENSGALG00000051139	ENSGALG00000047430			ENSGALG00000053233
ENSGALG00000051671	ENSGALG00000050555			ENSGALG00000016370
ENSGALG00000048503	ENSGALG00000050550			ENSGALG00000029648
ENSGALG00000016492	ENSGALG00000049999			ENSGALG00000034157
ENSGALG00000054549	ENSGALG00000054003			ENSGALG00000054410
ENSGALG00000053663	ENSGALG00000037035			ENSGALG00000048684
ENSGALG00000053015	ENSGALG00000047112			ENSGALG00000048537
ENSGALG00000053018	ENSGALG00000048149			ENSGALG00000027034
ENSGALG00000005504	ENSGALG00000054790			ENSGALG00000054046
ENSGALG00000018235	ENSGALG00000049913			ENSGALG00000046837
ENSGALG00000034315	ENSGALG00000049004			ENSGALG00000055050
ENSGALG00000047346	ENSGALG00000050693			ENSGALG00000031799
ENSGALG00000048836	ENSGALG00000050340			ENSGALG00000048336
ENSGALG00000017341	ENSGALG00000053280			ENSGALG00000047315
ENSGALG00000023580	ENSGALG00000050101			ENSGALG00000048803
ENSGALG00000049327	ENSGALG00000039440			ENSGALG00000052253
ENSGALG00000000274	ENSGALG00000052409			ENSGALG00000046961
ENSGALG00000049863	ENSGALG00000052402			ENSGALG00000048619
ENSGALG00000048695	ENSGALG00000052362			ENSGALG00000050832
ENSGALG00000036097	ENSGALG00000050046			ENSGALG00000054654
ENSGALG00000016498	ENSGALG00000025226			ENSGALG00000008898
ENSGALG00000025793	ENSGALG00000050701			ENSGALG00000047932
ENSGALG00000054258	ENSGALG00000052781			ENSGALG00000048101
ENSGALG00000053707	ENSGALG00000052867			ENSGALG00000049856
ENSGALG00000049160	ENSGALG00000049243			ENSGALG00000043872
ENSGALG00000050546	ENSGALG00000047123			ENSGALG00000021163
ENSGALG00000044491				ENSGALG00000054282
ENSGALG00000051388				ENSGALG00000047300
ENSGALG00000054791				ENSGALG00000040870
ENSGALG00000049140				ENSGALG00000052910
ENSGALG00000048676				ENSGALG00000029125
ENSGALG00000047152				ENSGALG00000050517
ENSGALG00000053096				ENSGALG00000048602
ENSGALG00000053093				ENSGALG00000048609
ENSGALG00000008273				ENSGALG00000053572
ENSGALG00000051928				ENSGALG00000050060
ENSGALG00000052590				ENSGALG00000054360
ENSGALG00000052596				ENSGALG00000047538
ENSGALG00000051022				ENSGALG00000051078
ENSGALG00000015606				ENSGALG00000049754
ENSGALG00000053972				ENSGALG00000049885
ENSGALG00000052757				ENSGALG00000013169
ENSGALG00000051223				ENSGALG00000053300
ENSGALG00000054705				ENSGALG00000051277
ENSGALG00000054707				ENSGALG00000037220
ENSGALG00000046054				ENSGALG00000040038
ENSGALG00000047855				ENSGALG00000041295
ENSGALG00000038138				ENSGALG00000048842
ENSGALG00000048218				ENSGALG00000053805
ENSGALG00000040898				ENSGALG00000047220
ENSGALG00000004280				ENSGALG00000029985
ENSGALG00000001081				ENSGALG00000043908
ENSGALG00000053660				ENSGALG00000050588
ENSGALG00000029740				ENSGALG00000049202
ENSGALG00000049560				ENSGALG00000049200
ENSGALG00000030629				ENSGALG00000050384
ENSGALG00000016258				ENSGALG00000053437
ENSGALG00000016020				ENSGALG00000051813
ENSGALG00000051613				ENSGALG00000051814
ENSGALG00000042798				ENSGALG00000051815
ENSGALG00000003176				ENSGALG00000050143
ENSGALG00000052419				ENSGALG00000050140
ENSGALG00000009904				ENSGALG00000050853
ENSGALG00000027783				ENSGALG00000054623
ENSGALG00000051145				ENSGALG00000052288
ENSGALG00000043200				ENSGALG00000052303
ENSGALG00000046188				ENSGALG00000052820
ENSGALG00000048050				ENSGALG00000051732
ENSGALG00000047279				ENSGALG00000049418
ENSGALG00000040720				ENSGALG00000050466
ENSGALG00000048940				ENSGALG00000022827
ENSGALG00000042617				ENSGALG00000048734
ENSGALG00000048559				ENSGALG00000054752
ENSGALG00000004102				ENSGALG00000051673
ENSGALG00000024749				ENSGALG00000049598
ENSGALG00000052622				ENSGALG00000049620
ENSGALG00000052161				ENSGALG00000048506
ENSGALG00000003302				ENSGALG00000048500
ENSGALG00000036500				ENSGALG00000054091
ENSGALG00000036504				ENSGALG00000053011
ENSGALG00000053197				ENSGALG00000047028
ENSGALG00000049352				ENSGALG00000052655
ENSGALG00000047609				ENSGALG00000050658
ENSGALG00000050433				ENSGALG00000050654
ENSGALG00000036360				ENSGALG00000027940
ENSGALG00000049831				ENSGALG00000051305
ENSGALG00000050908				ENSGALG00000028381
ENSGALG00000054265				ENSGALG00000048347
ENSGALG00000046761				ENSGALG00000052517
ENSGALG00000046767				ENSGALG00000047692
ENSGALG00000050572				ENSGALG00000051404
ENSGALG00000032914				ENSGALG00000049322
ENSGALG00000016677				ENSGALG00000049495
ENSGALG00000051359				ENSGALG00000049494
ENSGALG00000051973				ENSGALG00000050755
ENSGALG00000047892				ENSGALG00000031645
ENSGALG00000018294				ENSGALG00000034189
ENSGALG00000052074				ENSGALG00000016494
ENSGALG00000047335				ENSGALG00000054054
ENSGALG00000032592				ENSGALG00000050951
ENSGALG00000009041				ENSGALG00000054254
ENSGALG00000054632				ENSGALG00000046799
ENSGALG00000050705				ENSGALG00000050547
ENSGALG00000044567				ENSGALG00000049989
ENSGALG00000050986				ENSGALG00000054090
ENSGALG00000050989				ENSGALG00000017927
ENSGALG00000017398				ENSGALG00000054016
ENSGALG00000053759				ENSGALG00000017347
ENSGALG00000003952				ENSGALG00000046809
ENSGALG00000052937				ENSGALG00000054837
ENSGALG00000048087				ENSGALG00000047670
ENSGALG00000033489				ENSGALG00000050037
ENSGALG00000049960				ENSGALG00000051575
ENSGALG00000054888				ENSGALG00000051570
ENSGALG00000054309				ENSGALG00000052591
ENSGALG00000025582				ENSGALG00000036823
ENSGALG00000053654				ENSGALG00000051027
ENSGALG00000053655				ENSGALG00000051026
ENSGALG00000043998				ENSGALG00000049700
ENSGALG00000027398				ENSGALG00000049704
ENSGALG00000025220				ENSGALG00000047997
ENSGALG00000008635				ENSGALG00000053357
ENSGALG00000052194				ENSGALG00000047887
ENSGALG00000052225				ENSGALG00000052754
ENSGALG00000054489				ENSGALG00000052756
ENSGALG00000054482				ENSGALG00000054979
ENSGALG00000047765				ENSGALG00000025493
ENSGALG00000013225				ENSGALG00000048219
ENSGALG00000052422				ENSGALG00000053783
ENSGALG00000044447				ENSGALG00000046107
ENSGALG00000034962				ENSGALG00000049908
ENSGALG00000045310				ENSGALG00000051149
ENSGALG00000048006				ENSGALG00000048208
ENSGALG00000019300				ENSGALG00000049584
ENSGALG00000012155				ENSGALG00000055082
ENSGALG00000054520				ENSGALG00000054805
ENSGALG00000050630				ENSGALG00000052046
ENSGALG00000046888				ENSGALG00000046690
ENSGALG00000046882				ENSGALG00000051533
ENSGALG00000035137				ENSGALG00000051537
ENSGALG00000049143				ENSGALG00000050311
ENSGALG00000047651				ENSGALG00000018319
ENSGALG00000052805				ENSGALG00000054111
ENSGALG00000041779				ENSGALG00000054114
ENSGALG00000054775				ENSGALG00000038995
ENSGALG00000053201				ENSGALG00000050827
ENSGALG00000052307				ENSGALG00000051707
ENSGALG00000029675				ENSGALG00000048299
ENSGALG00000047288				ENSGALG00000048290
ENSGALG00000048522				ENSGALG00000048296
ENSGALG00000039256				ENSGALG00000052350
ENSGALG00000015595				ENSGALG00000047278
ENSGALG00000051324				ENSGALG00000053166
ENSGALG00000048624				ENSGALG00000046956
ENSGALG00000048817				ENSGALG00000046951
ENSGALG00000051425				ENSGALG00000055132
ENSGALG00000052883				ENSGALG00000048052
ENSGALG00000050777				ENSGALG00000052353
ENSGALG00000010137				ENSGALG00000048942
ENSGALG00000051100				ENSGALG00000002413
ENSGALG00000053898				ENSGALG00000047076
ENSGALG00000050527				ENSGALG00000050662
ENSGALG00000048614				ENSGALG00000046851
ENSGALG00000033701				ENSGALG00000050083
ENSGALG00000053563				ENSGALG00000052160
ENSGALG00000006072				ENSGALG00000048393
ENSGALG00000025532				ENSGALG00000038561
ENSGALG00000048891				ENSGALG00000049113
ENSGALG00000051042				ENSGALG00000013084
ENSGALG00000049765				ENSGALG00000051844
ENSGALG00000049760				ENSGALG00000051841
ENSGALG00000050316				ENSGALG00000025285
ENSGALG00000050318				ENSGALG00000052127
ENSGALG00000054177				ENSGALG00000052124
ENSGALG00000032315				ENSGALG00000051474
ENSGALG00000052472				ENSGALG00000051472
ENSGALG00000015045				ENSGALG00000051784
ENSGALG00000008434				ENSGALG00000050780
ENSGALG00000053605				ENSGALG00000050430
ENSGALG00000054690				ENSGALG00000036364
ENSGALG00000049578				ENSGALG00000021788
ENSGALG00000053445				ENSGALG00000037576
ENSGALG00000029560				ENSGALG00000026627
ENSGALG00000041575				ENSGALG00000053253
ENSGALG00000050846				ENSGALG00000051490
ENSGALG00000047668				ENSGALG00000027705
ENSGALG00000048721				ENSGALG00000050903
ENSGALG00000054722				ENSGALG00000054267
ENSGALG00000053188				ENSGALG00000046760
ENSGALG00000053185				ENSGALG00000049673
ENSGALG00000039416				ENSGALG00000050571
ENSGALG00000051122				ENSGALG00000042690
ENSGALG00000049313				ENSGALG00000042692
ENSGALG00000047258				ENSGALG00000021728
ENSGALG00000040567				ENSGALG00000054800
ENSGALG00000048576				ENSGALG00000051971
ENSGALG00000027189				ENSGALG00000055074
ENSGALG00000054555				ENSGALG00000055076
ENSGALG00000052687				ENSGALG00000055073
ENSGALG00000008178				ENSGALG00000050003
ENSGALG00000005519				ENSGALG00000006031
ENSGALG00000047193				ENSGALG00000034697
ENSGALG00000025909				ENSGALG00000052091
ENSGALG00000053598				ENSGALG00000047330
ENSGALG00000053271				ENSGALG00000049194
ENSGALG00000050789				ENSGALG00000051014
ENSGALG00000053736				ENSGALG00000049730
ENSGALG00000047784				ENSGALG00000052707
ENSGALG00000013212				ENSGALG00000050707
ENSGALG00000025413				ENSGALG00000050703
ENSGALG00000051371				ENSGALG00000047918
ENSGALG00000036075				ENSGALG00000037678
ENSGALG00000048439				ENSGALG00000050987
ENSGALG00000053969				ENSGALG00000050988
ENSGALG00000053344				ENSGALG00000053751
ENSGALG00000053349				ENSGALG00000034267
ENSGALG00000006258				ENSGALG00000049546
ENSGALG00000047097				ENSGALG00000049541
ENSGALG00000032638				ENSGALG00000047491
ENSGALG00000049651				ENSGALG00000047493
ENSGALG00000022762				ENSGALG00000047492
ENSGALG00000054792				ENSGALG00000049975
ENSGALG00000054423				ENSGALG00000049972
ENSGALG00000047705				ENSGALG00000033739
ENSGALG00000052483				ENSGALG00000051933
ENSGALG00000044425				ENSGALG00000046683
ENSGALG00000049910				ENSGALG00000047743
ENSGALG00000053532				ENSGALG00000055120
ENSGALG00000047786				ENSGALG00000009573
ENSGALG00000055090				ENSGALG00000034363
ENSGALG00000053674				ENSGALG00000051093
ENSGALG00000044243				ENSGALG00000045605
ENSGALG00000052691				ENSGALG00000050322
ENSGALG00000052695				ENSGALG00000050321
ENSGALG00000050691				ENSGALG00000048581
ENSGALG00000053985				ENSGALG00000051953
ENSGALG00000053475				ENSGALG00000047349
ENSGALG00000050103				ENSGALG00000017016
ENSGALG00000043896				ENSGALG00000051254
ENSGALG00000001912				ENSGALG00000048132
ENSGALG00000032800				ENSGALG00000038930
ENSGALG00000024136				ENSGALG00000053864
ENSGALG00000011635				ENSGALG00000053282
ENSGALG00000050721				ENSGALG00000018289
ENSGALG00000025578				ENSGALG00000047767
ENSGALG00000048547				ENSGALG00000051196
ENSGALG00000048549				ENSGALG00000051192
ENSGALG00000052617				ENSGALG00000046967
ENSGALG00000050616				ENSGALG00000021772
ENSGALG00000025594				ENSGALG00000048913
ENSGALG00000032318				ENSGALG00000047691
ENSGALG00000046962				ENSGALG00000054380
ENSGALG00000050892				ENSGALG00000051547
ENSGALG00000049367				ENSGALG00000050632
ENSGALG00000003911				ENSGALG00000047869
ENSGALG00000049820				ENSGALG00000046053
ENSGALG00000049827				ENSGALG00000049147
ENSGALG00000051363				ENSGALG00000053418
				ENSGALG00000039633
				ENSGALG00000050876
				ENSGALG00000052113
				ENSGALG00000052800
				ENSGALG00000052809
				ENSGALG00000048714
				ENSGALG00000048719
				ENSGALG00000054774
				ENSGALG00000054127
				ENSGALG00000050244
				ENSGALG00000046736
				ENSGALG00000015824
				ENSGALG00000048992
				ENSGALG00000048994
				ENSGALG00000051655
				ENSGALG00000051656
				ENSGALG00000048693
				ENSGALG00000012890
				ENSGALG00000048527
				ENSGALG00000048529
				ENSGALG00000010342
				ENSGALG00000047363
				ENSGALG00000048813
				ENSGALG00000054645
				ENSGALG00000051426
				ENSGALG00000051423
				ENSGALG00000047162
				ENSGALG00000047165
				ENSGALG00000052730
				ENSGALG00000052735
				ENSGALG00000051285
				ENSGALG00000050775
				ENSGALG00000050773
				ENSGALG00000049849
				ENSGALG00000053897
				ENSGALG00000053890
				ENSGALG00000052969
				ENSGALG00000052968
				ENSGALG00000047467
				ENSGALG00000040115
				ENSGALG00000050521
				ENSGALG00000011459
				ENSGALG00000053569
				ENSGALG00000053561
				ENSGALG00000046945
				ENSGALG00000049766
				ENSGALG00000048407
				ENSGALG00000030353
				ENSGALG00000007172
				ENSGALG00000052279
				ENSGALG00000052275
				ENSGALG00000025998
				ENSGALG00000025157
				ENSGALG00000048238
				ENSGALG00000053812
				ENSGALG00000054457
				ENSGALG00000053101
				ENSGALG00000052474
				ENSGALG00000046932
				ENSGALG00000046935
				ENSGALG00000034952
				ENSGALG00000043260
				ENSGALG00000048036
				ENSGALG00000048037
				ENSGALG00000049922
				ENSGALG00000049920
				ENSGALG00000047369
				ENSGALG00000052642
				ENSGALG00000053410
				ENSGALG00000047099
				ENSGALG00000049271
				ENSGALG00000051296
				ENSGALG00000048489
				ENSGALG00000048483
				ENSGALG00000050687
				ENSGALG00000053440
				ENSGALG00000053444
				ENSGALG00000041511
				ENSGALG00000052143
				ENSGALG00000048729
				ENSGALG00000048724
				ENSGALG00000054724
				ENSGALG00000055110
				ENSGALG00000055116
				ENSGALG00000052339
				ENSGALG00000047255
				ENSGALG00000048965
				ENSGALG00000049610
				ENSGALG00000019842
				ENSGALG00000054087
				ENSGALG00000053683
				ENSGALG00000054557
				ENSGALG00000053024
				ENSGALG00000052640
				ENSGALG00000054590
				ENSGALG00000051464
				ENSGALG00000048371
				ENSGALG00000047351
				ENSGALG00000049130
				ENSGALG00000047197
				ENSGALG00000052851
				ENSGALG00000002289
				ENSGALG00000049817
				ENSGALG00000049818
				ENSGALG00000007831
				ENSGALG00000049907
				ENSGALG00000014228
				ENSGALG00000002287
				ENSGALG00000025182
				ENSGALG00000054246
				ENSGALG00000053733
				ENSGALG00000046786
				ENSGALG00000052953
				ENSGALG00000050558
				ENSGALG00000032971
				ENSGALG00000048643
				ENSGALG00000054820
				ENSGALG00000050025
				ENSGALG00000047529
				ENSGALG00000048846
				ENSGALG00000051031
				ENSGALG00000049714
				ENSGALG00000054618
				ENSGALG00000052764
				ENSGALG00000040468
				ENSGALG00000051238
				ENSGALG00000048142
				ENSGALG00000050252
				ENSGALG00000027522
				ENSGALG00000051682
				ENSGALG00000052484
				ENSGALG00000052486
				ENSGALG00000053538
				ENSGALG00000009511
				ENSGALG00000052690
				ENSGALG00000052698
				ENSGALG00000047572
				ENSGALG00000049795
				ENSGALG00000050694
				ENSGALG00000052263
				ENSGALG00000047435
				ENSGALG00000054188
				ENSGALG00000052389
				ENSGALG00000050795
				ENSGALG00000052510
				ENSGALG00000042845
				ENSGALG00000031485
				ENSGALG00000051772
				ENSGALG00000048266
				ENSGALG00000048262
				ENSGALG00000009274
				ENSGALG00000054711
				ENSGALG00000054716
				ENSGALG00000053159
				ENSGALG00000053150
				ENSGALG00000052403
				ENSGALG00000055121
				ENSGALG00000048060
				ENSGALG00000052367
				ENSGALG00000031144
				ENSGALG00000025221
				ENSGALG00000054509
				ENSGALG00000054502
				ENSGALG00000047065
				ENSGALG00000047066
				ENSGALG00000034516
				ENSGALG00000047806
				ENSGALG00000018292
				ENSGALG00000040613
				ENSGALG00000048380
				ENSGALG00000049163
				ENSGALG00000026584
				ENSGALG00000052729
				ENSGALG00000050890
				ENSGALG00000052131
				ENSGALG00000016169
				ENSGALG00000040945
				ENSGALG00000052790
				ENSGALG00000051444
				ENSGALG00000049366
				ENSGALG00000052869
				ENSGALG00000052860
				ENSGALG00000050790
				ENSGALG00000050424
				ENSGALG00000050428
				ENSGALG00000049319
				ENSGALG00000048195
				ENSGALG00000048197
				ENSGALG00000054497
				ENSGALG00000016367

## Sheet: Table S6
Table S6. The number of DEGs between each developmental stages in BM and AF tissues
Number of DEGs between each developmental stages of breast muscle
	E12	E17	D01	D07	D21	D56	D98	D140	D180
E12	0	554	1851	2156	2942	2645	2845	3308	3448
E17	878	0	422	1052	2208	1775	1996	2578	2782
D01	1674	457	0	189	1197	969	1251	1710	1876
D07	2041	1211	320	0	389	326	647	1083	1253
D21	2475	2028	1264	323	0	30	269	224	258
D56	2618	1971	1280	409	14	0	95	356	546
D98	2904	2271	1705	845	522	231	0	371	408
D140	2783	2336	1681	879	188	296	128	0	8
D180	2791	2410	1802	992	238	472	261	5	0
Number of DEGs between each developmental stages of abdominal fat
	D07	D21	D56	D98	D140	D180
D07	0	685	1250	1408	2114	2287
D21	492	0	80	283	997	1107
D56	923	77	0	186	622	817
D98	1005	288	307	0	209	240
D140	1502	831	645	152	0	24
D180	1560	906	888	207	24	0
* The up triangular matrices shows the up regulated gene number, and the down triangular matrices shows the down regulated gene number.

## Sheet: Table S7
Table S7. BM and AF expressed transcription factors of DDGs number in different stages
Stages	BM TF	BM TF cofactors	AF TF	AF TF cofactors
E12	421	392	-*	-
E17	414	391	-	-
D01	408	388	-	-
D07	399	387	351	304
D21	389	388	342	301
D56	391	385	336	293
D98	386	389	330	294
D140	392	387	322	293
D180	391	387	323	295
The * means abdominal fat samples are not available in the early 3 stages.

## Sheet: Table S8
Table S8. DDGs list
DDGs of BM	TF of BM DDGs	TF cofactors of BM DDGs	DDGs of AF	TF of AF DDGs	TF cofactors of AF DDGs
ENSGALG00000018335	ENSGALG00000032992	ENSGALG00000000156	ENSGALG00000027608	ENSGALG00000017098	ENSGALG00000000146
ENSGALG00000027608	ENSGALG00000009645	ENSGALG00000000401	ENSGALG00000031381	ENSGALG00000030011	ENSGALG00000000156
ENSGALG00000031381	ENSGALG00000032259	ENSGALG00000000404	ENSGALG00000014965	ENSGALG00000029588	ENSGALG00000000244
ENSGALG00000050223	ENSGALG00000001031	ENSGALG00000000551	ENSGALG00000026594	ENSGALG00000015705	ENSGALG00000000402
ENSGALG00000014965	ENSGALG00000039573	ENSGALG00000000589	ENSGALG00000014979	ENSGALG00000032546	ENSGALG00000000404
ENSGALG00000014962	ENSGALG00000015705	ENSGALG00000000678	ENSGALG00000014991	ENSGALG00000008702	ENSGALG00000000551
ENSGALG00000014963	ENSGALG00000032546	ENSGALG00000000843	ENSGALG00000051082	ENSGALG00000001143	ENSGALG00000000589
ENSGALG00000026594	ENSGALG00000016823	ENSGALG00000000884	ENSGALG00000003604	ENSGALG00000033517	ENSGALG00000000884
ENSGALG00000054582	ENSGALG00000039982	ENSGALG00000000903	ENSGALG00000026077	ENSGALG00000004597	ENSGALG00000000903
ENSGALG00000014991	ENSGALG00000027247	ENSGALG00000000943	ENSGALG00000048771	ENSGALG00000004274	ENSGALG00000000991
ENSGALG00000051082	ENSGALG00000036869	ENSGALG00000000991	ENSGALG00000000146	ENSGALG00000007651	ENSGALG00000001021
ENSGALG00000003604	ENSGALG00000012304	ENSGALG00000001021	ENSGALG00000031255	ENSGALG00000040180	ENSGALG00000001153
ENSGALG00000003657	ENSGALG00000029382	ENSGALG00000001153	ENSGALG00000050914	ENSGALG00000013793	ENSGALG00000001245
ENSGALG00000003665	ENSGALG00000029316	ENSGALG00000001229	ENSGALG00000050912	ENSGALG00000009424	ENSGALG00000001489
ENSGALG00000026077	ENSGALG00000028912	ENSGALG00000001245	ENSGALG00000011498	ENSGALG00000012799	ENSGALG00000001506
ENSGALG00000048771	ENSGALG00000005708	ENSGALG00000001332	ENSGALG00000019622	ENSGALG00000043460	ENSGALG00000001555
ENSGALG00000030512	ENSGALG00000004274	ENSGALG00000001363	ENSGALG00000042371	ENSGALG00000040971	ENSGALG00000001595
ENSGALG00000028210	ENSGALG00000033087	ENSGALG00000001489	ENSGALG00000011518	ENSGALG00000046336	ENSGALG00000001633
ENSGALG00000011739	ENSGALG00000007651	ENSGALG00000001506	ENSGALG00000039920	ENSGALG00000029024	ENSGALG00000001644
ENSGALG00000007494	ENSGALG00000030902	ENSGALG00000001555	ENSGALG00000043379	ENSGALG00000042095	ENSGALG00000001774
ENSGALG00000032992	ENSGALG00000037164	ENSGALG00000001569	ENSGALG00000049464	ENSGALG00000012049	ENSGALG00000001802
ENSGALG00000012322	ENSGALG00000013793	ENSGALG00000001596	ENSGALG00000007917	ENSGALG00000022896	ENSGALG00000002066
ENSGALG00000052007	ENSGALG00000009424	ENSGALG00000001644	ENSGALG00000007183	ENSGALG00000008393	ENSGALG00000002138
ENSGALG00000007404	ENSGALG00000038026	ENSGALG00000001708	ENSGALG00000009627	ENSGALG00000015101	ENSGALG00000002144
ENSGALG00000050915	ENSGALG00000012799	ENSGALG00000001727	ENSGALG00000009612	ENSGALG00000000836	ENSGALG00000002198
ENSGALG00000050912	ENSGALG00000043460	ENSGALG00000001768	ENSGALG00000009615	ENSGALG00000042534	ENSGALG00000002219
ENSGALG00000054219	ENSGALG00000040971	ENSGALG00000001774	ENSGALG00000009690	ENSGALG00000002968	ENSGALG00000002222
ENSGALG00000019622	ENSGALG00000007520	ENSGALG00000001802	ENSGALG00000046585	ENSGALG00000028942	ENSGALG00000002336
ENSGALG00000042371	ENSGALG00000046336	ENSGALG00000001976	ENSGALG00000024498	ENSGALG00000010035	ENSGALG00000002469
ENSGALG00000011518	ENSGALG00000029329	ENSGALG00000002060	ENSGALG00000021074	ENSGALG00000016086	ENSGALG00000002484
ENSGALG00000037533	ENSGALG00000008393	ENSGALG00000002066	ENSGALG00000003206	ENSGALG00000031862	ENSGALG00000002499
ENSGALG00000017190	ENSGALG00000015101	ENSGALG00000002070	ENSGALG00000034860	ENSGALG00000005796	ENSGALG00000002634
ENSGALG00000007025	ENSGALG00000007000	ENSGALG00000002144	ENSGALG00000042159	ENSGALG00000044069	ENSGALG00000002656
ENSGALG00000049464	ENSGALG00000042534	ENSGALG00000002197	ENSGALG00000009533	ENSGALG00000030844	ENSGALG00000002659
ENSGALG00000007917	ENSGALG00000002968	ENSGALG00000002198	ENSGALG00000054759	ENSGALG00000006074	ENSGALG00000002781
ENSGALG00000046759	ENSGALG00000007357	ENSGALG00000002219	ENSGALG00000009549	ENSGALG00000009129	ENSGALG00000002836
ENSGALG00000046757	ENSGALG00000010035	ENSGALG00000002222	ENSGALG00000039108	ENSGALG00000009925	ENSGALG00000002959
ENSGALG00000009616	ENSGALG00000016086	ENSGALG00000002249	ENSGALG00000037712	ENSGALG00000017195	ENSGALG00000002963
ENSGALG00000009627	ENSGALG00000004598	ENSGALG00000002336	ENSGALG00000001028	ENSGALG00000015008	ENSGALG00000002971
ENSGALG00000009612	ENSGALG00000016462	ENSGALG00000002377	ENSGALG00000032717	ENSGALG00000005354	ENSGALG00000003085
ENSGALG00000009645	ENSGALG00000040079	ENSGALG00000002424	ENSGALG00000017098	ENSGALG00000015688	ENSGALG00000003144
ENSGALG00000009690	ENSGALG00000043204	ENSGALG00000002484	ENSGALG00000052037	ENSGALG00000014976	ENSGALG00000003233
ENSGALG00000046585	ENSGALG00000040582	ENSGALG00000002499	ENSGALG00000034376	ENSGALG00000014138	ENSGALG00000003261
ENSGALG00000004120	ENSGALG00000008988	ENSGALG00000002581	ENSGALG00000030011	ENSGALG00000017050	ENSGALG00000003304
ENSGALG00000021074	ENSGALG00000005796	ENSGALG00000002659	ENSGALG00000052945	ENSGALG00000037437	ENSGALG00000003325
ENSGALG00000049890	ENSGALG00000044069	ENSGALG00000002682	ENSGALG00000032585	ENSGALG00000041470	ENSGALG00000003339
ENSGALG00000015132	ENSGALG00000006074	ENSGALG00000002686	ENSGALG00000052195	ENSGALG00000032994	ENSGALG00000003428
ENSGALG00000034860	ENSGALG00000016147	ENSGALG00000002735	ENSGALG00000029588	ENSGALG00000036017	ENSGALG00000003498
ENSGALG00000042159	ENSGALG00000009129	ENSGALG00000002781	ENSGALG00000021304	ENSGALG00000036163	ENSGALG00000003559
ENSGALG00000043623	ENSGALG00000009925	ENSGALG00000002922	ENSGALG00000003582	ENSGALG00000034076	ENSGALG00000003605
ENSGALG00000009549	ENSGALG00000017195	ENSGALG00000002954	ENSGALG00000023552	ENSGALG00000014297	ENSGALG00000003634
ENSGALG00000032259	ENSGALG00000015008	ENSGALG00000002959	ENSGALG00000026625	ENSGALG00000012538	ENSGALG00000003650
ENSGALG00000039108	ENSGALG00000005354	ENSGALG00000002971	ENSGALG00000003446	ENSGALG00000038420	ENSGALG00000003771
ENSGALG00000037712	ENSGALG00000012629	ENSGALG00000003026	ENSGALG00000003547	ENSGALG00000016971	ENSGALG00000003786
ENSGALG00000001031	ENSGALG00000008253	ENSGALG00000003085	ENSGALG00000013376	ENSGALG00000031890	ENSGALG00000003793
ENSGALG00000001028	ENSGALG00000036043	ENSGALG00000003221	ENSGALG00000039773	ENSGALG00000000616	ENSGALG00000003803
ENSGALG00000032717	ENSGALG00000028415	ENSGALG00000003325	ENSGALG00000050416	ENSGALG00000013424	ENSGALG00000003914
ENSGALG00000034478	ENSGALG00000015688	ENSGALG00000003339	ENSGALG00000052865	ENSGALG00000013420	ENSGALG00000003950
ENSGALG00000053868	ENSGALG00000014976	ENSGALG00000003428	ENSGALG00000029971	ENSGALG00000028817	ENSGALG00000004044
ENSGALG00000043603	ENSGALG00000037437	ENSGALG00000003474	ENSGALG00000050793	ENSGALG00000037455	ENSGALG00000004122
ENSGALG00000018344	ENSGALG00000041470	ENSGALG00000003498	ENSGALG00000020986	ENSGALG00000030455	ENSGALG00000004123
ENSGALG00000052037	ENSGALG00000036017	ENSGALG00000003522	ENSGALG00000036111	ENSGALG00000034111	ENSGALG00000004143
ENSGALG00000041973	ENSGALG00000036163	ENSGALG00000003566	ENSGALG00000016299	ENSGALG00000004304	ENSGALG00000004192
ENSGALG00000041909	ENSGALG00000030998	ENSGALG00000003596	ENSGALG00000016300	ENSGALG00000008886	ENSGALG00000004288
ENSGALG00000003582	ENSGALG00000034076	ENSGALG00000003605	ENSGALG00000016301	ENSGALG00000043641	ENSGALG00000004324
ENSGALG00000013372	ENSGALG00000016287	ENSGALG00000003634	ENSGALG00000016309	ENSGALG00000012966	ENSGALG00000004496
ENSGALG00000003446	ENSGALG00000012538	ENSGALG00000003641	ENSGALG00000016313	ENSGALG00000001518	ENSGALG00000004508
ENSGALG00000003547	ENSGALG00000031700	ENSGALG00000003650	ENSGALG00000015705	ENSGALG00000029387	ENSGALG00000004542
ENSGALG00000039773	ENSGALG00000038420	ENSGALG00000003681	ENSGALG00000015699	ENSGALG00000017389	ENSGALG00000004701
ENSGALG00000034328	ENSGALG00000016971	ENSGALG00000003803	ENSGALG00000015708	ENSGALG00000029401	ENSGALG00000004825
ENSGALG00000039573	ENSGALG00000013086	ENSGALG00000003875	ENSGALG00000050742	ENSGALG00000003248	ENSGALG00000004997
ENSGALG00000039156	ENSGALG00000023296	ENSGALG00000003950	ENSGALG00000016531	ENSGALG00000039228	ENSGALG00000004998
ENSGALG00000020985	ENSGALG00000013420	ENSGALG00000004044	ENSGALG00000015598	ENSGALG00000033083	ENSGALG00000005087
ENSGALG00000050793	ENSGALG00000038265	ENSGALG00000004122	ENSGALG00000054030	ENSGALG00000001073	ENSGALG00000005145
ENSGALG00000051487	ENSGALG00000005409	ENSGALG00000004123	ENSGALG00000027714	ENSGALG00000036543	ENSGALG00000005230
ENSGALG00000020986	ENSGALG00000007914	ENSGALG00000004143	ENSGALG00000023089	ENSGALG00000025759	ENSGALG00000005279
[truncated: 8,469 more rows]

## Sheet: Table S9
Table S9. Transcription factors of DDGs and WGCNA results
[truncated: 1,135 more rows]

[truncated: 2 more sheets: Table S10, Table S11]
